# Supplementary material for: Identification and Expression Profiling of miRNAome in Goat longissimus dorsi Muscle from Prenatal Stages to a Neonatal Stage
Source: PLoS One. 2016 Oct 31;11(10):e0165764. doi: 10.1371/journal.pone.0165764 (PMC5087842; doi:10.1371/journal.pone.0165764)
Supplement: S8 Table — (XLSX) [file pone.0165764.s008.xlsx]

## Sheet: List
Table S8 Significant Gene ontology (GO) pathways for the targets of DE miRNAs between different stages.
Table S8-1 Significantly enriched Gene ontology (GO) biological processes for the targets of DE miRNAs between E45 and E60.
Table S8-2 Significantly enriched Gene ontology (GO) biological processes for the targets of DE miRNAs between E45 and E105.
Table S8-3 Significantly enriched Gene ontology (GO) biological processes for the targets of DE miRNAs between E45 and B3.
Table S8-4 Significantly enriched Gene ontology (GO) biological processes for the targets of DE miRNAs between E60 and E105.
Table S8-5 Significantly enriched Gene ontology (GO) biological processes for the targets of DE miRNAs between E60 and B3.
Table S8-6 Significantly enriched Gene ontology (GO) biological processes for the targets of DE miRNAs between E105 and B3.

## Sheet: E45 vs E60
Table S8-1 Significantly enriched Gene ontology (GO) biological processes for the targets of DE miRNAs between E45 and E60.
GO id	GO Terms	Gene number	Genes	p-value	change direction(DE miRNAs)
GO:0007517	muscle organ development	11	SRPK3, MEF2C, LAMA2, BVES, ACTA1, NEB, FHL1, MYH3, DMD, ITGB1BP2, CAPN3	1.82e-07	down
GO:0006936	muscle contraction	9	DES, ACTA1, MYBPC1, MYH3, SNTB1, DAG1, ACTN2, MYOM1, MYH8	1.61e-06	down
GO:0003012	muscle system process	9	DES, ACTA1, MYBPC1, MYH3, SNTB1, DAG1, ACTN2, MYOM1, MYH8	3.24e-06	down
GO:0007044	cell-substrate junction assembly	4	ITGA6, ACTN2, LAMC1, ITGB3	0.000247065	down
GO:0030029	actin filament-based process	8	TNXB, ACTA1, PDLIM7, XIRP2, MYH3, LMO7, DAAM1, CAPN3	0.000312895	down
GO:0007155	cell adhesion	13	LAMA2, EMCN, TNXB, COL6A6, ITGA6, MYBPC1, PECAM1, LMO7, ACTN2, LAMC1, ITGB3, MCAM, ADAM15	0.000336709	down
GO:0022610	biological adhesion	13	LAMA2, EMCN, TNXB, COL6A6, ITGA6, MYBPC1, PECAM1, LMO7, ACTN2, LAMC1, ITGB3, MCAM, ADAM15	0.00034111	down
GO:0030036	actin cytoskeleton organization	7	TNXB, ACTA1, PDLIM7, XIRP2, LMO7, DAAM1, CAPN3	0.00136288	down
GO:0034329	cell junction assembly	4	ITGA6, ACTN2, LAMC1, ITGB3	0.00138715	down
GO:0031589	cell-substrate adhesion	5	ITGA6, ACTN2, LAMC1, ITGB3, ADAM15	0.001923	down
GO:0007010	cytoskeleton organization	9	DES, TNXB, ACTA1, PDLIM7, XIRP2, DMD, LMO7, DAAM1, CAPN3	0.00234635	down
GO:0034330	cell junction organization	4	ITGA6, ACTN2, LAMC1, ITGB3	0.00357991	down
GO:0031032	actomyosin structure organization	3	ACTA1, LMO7, CAPN3	0.00991563	down
GO:0007160	cell-matrix adhesion	4	ITGA6, ACTN2, ITGB3, ADAM15	0.0122908	down
GO:0030155	regulation of cell adhesion	4	LAMA2, EMCN, ITGA6, TGM2	0.0378128	down
GO:0001568	blood vessel development	7	ZMIZ1, NTRK2, PRRX1, THBS1, GJA5, COL5A1, SLIT2	7.6e-05	up
GO:0001944	vasculature development	7	ZMIZ1, NTRK2, PRRX1, THBS1, GJA5, COL5A1, SLIT2	8.69e-05	up
GO:0042127	regulation of cell proliferation	9	S1PR3, ID2, JARID2, ZMIZ1, PRRX1, GJA1, WFDC1, THBS1, TBX18	0.00184694	up
GO:0048598	embryonic morphogenesis	6	WNT5A, PRRX1, FBN2, GJA5, TBX18, SLIT2	0.00199885	up
GO:0030326	embryonic limb morphogenesis	4	WNT5A, PRRX1, FBN2, GJA5	0.00213754	up
GO:0035113	embryonic appendage morphogenesis	4	WNT5A, PRRX1, FBN2, GJA5	0.00213754	up
GO:0035107	appendage morphogenesis	4	WNT5A, PRRX1, FBN2, GJA5	0.00308663	up
GO:0035108	limb morphogenesis	4	WNT5A, PRRX1, FBN2, GJA5	0.00308663	up
GO:0048514	blood vessel morphogenesis	5	ZMIZ1, NTRK2, PRRX1, THBS1, SLIT2	0.00338724	up
GO:0048736	appendage development	4	WNT5A, PRRX1, FBN2, GJA5	0.00345201	up
GO:0060173	limb development	4	WNT5A, PRRX1, FBN2, GJA5	0.00345201	up
GO:0007507	heart development	5	ID2, ZMIZ1, GJA1, GJA5, COL5A1	0.00362263	up
GO:0048666	neuron development	5	ALCAM, NTRK2, GJA1, AGRN, SLIT2	0.0174131	up
GO:0008219	cell death	7	ATN1, PREX1, YWHAB, GJA1, THBS1, SCRIB, DAPK1	0.0180881	up
GO:0016265	death	7	ATN1, PREX1, YWHAB, GJA1, THBS1, SCRIB, DAPK1	0.0186552	up
GO:0051960	regulation of nervous system development	4	ATN1, NTRK2, AGRN, SLIT2	0.018923	up
GO:0060284	regulation of cell development	4	ATN1, NTRK2, AGRN, SLIT2	0.0224586	up
GO:0002040	sprouting angiogenesis	2	THBS1, SLIT2	0.0263066	up
GO:0035295	tube development	4	WNT5A, GJA5, SCRIB, SLIT2	0.0269584	up
GO:0006915	apoptosis	6	PREX1, YWHAB, GJA1, THBS1, SCRIB, DAPK1	0.0312254	up
GO:0012501	programmed cell death	6	PREX1, YWHAB, GJA1, THBS1, SCRIB, DAPK1	0.0329959	up
GO:0008284	positive regulation of cell proliferation	5	S1PR3, ID2, ZMIZ1, PRRX1, TBX18	0.0331945	up
GO:0008045	motor axon guidance	2	ALCAM, SLIT2	0.0377807	up
GO:0030182	neuron differentiation	5	ALCAM, NTRK2, GJA1, AGRN, SLIT2	0.03958	up
GO:0048844	artery morphogenesis	2	ZMIZ1, PRRX1	0.0406285	up
GO:0000122	negative regulation of transcription from RNA polymerase II promoter	4	DNMT3A, ID2, ATN1, JARID2	0.0435466	up
GO:0016481	negative regulation of transcription	5	DNMT3A, ID2, ATN1, JARID2, YWHAB	0.0457115	up
GO:0007009	plasma membrane organization	2	AGRN, COL5A1	0.0462996	up
GO:0016477	cell migration	4	THBS1, COL5A1, SCRIB, SLIT2	0.0476994	up
GO:0002053	positive regulation of mesenchymal cell proliferation	2	PRRX1, TBX18	0.0491229	up

## Sheet: E45 vs E105
Table S8-2 Significantly enriched Gene ontology (GO) biological processes for the targets of DE miRNAs between E45 and E105.
GO ID	GO Terms	Gene number	Genes	p-value*	change direction(DE miRNAs)
GO:0007517	muscle organ development	20	SRPK3, MEF2C, MYF6, ZFAND5, ACTA1, FHL1, MET, MBNL1, TPM1, CAPN3, LAMA2, BVES, NEB, DMD, ITGB1BP2, VAMP5, HBEGF, SGCE, MYOG, SNTA1	6.55734e-10	down
GO:0006936	muscle contraction	16	MYH1, ACTA1, MYBPC1, DAG1, ACTN2, TPM1, MYH8, MYOT, DES, SNTB1, RYR1, CAMK2D, TMOD4, MYOM1, CASQ2, SNTA1	1.40216e-08	down
GO:0003012	muscle system process	16	MYH1, ACTA1, MYBPC1, DAG1, ACTN2, TPM1, MYH8, MYOT, DES, SNTB1, RYR1, CAMK2D, TMOD4, MYOM1, CASQ2, SNTA1	4.96856e-08	down
GO:0007155	cell adhesion	24	F11R, EMCN, TNXB, EPDR1, MYBPC1, LMO7, ACTN2, ECM2, MCAM, CTNNA3, CDH5, LAMA2, AMIGO2, LYVE1, S1PR1, COL6A6, CD93, CD34, STAB1, TEK, PECAM1, SGCE, LAMC1, ADAM15	0.000517204	down
GO:0022610	biological adhesion	24	F11R, EMCN, TNXB, EPDR1, MYBPC1, LMO7, ACTN2, ECM2, MCAM, CTNNA3, CDH5, LAMA2, AMIGO2, LYVE1, S1PR1, COL6A6, CD93, CD34, STAB1, TEK, PECAM1, SGCE, LAMC1, ADAM15	0.000527526	down
GO:0007519	skeletal muscle tissue development	7	MYF6, ACTA1, DMD, VAMP5, MYOG, MBNL1, SNTA1	0.000531639	down
GO:0060538	skeletal muscle organ development	7	MYF6, ACTA1, DMD, VAMP5, MYOG, MBNL1, SNTA1	0.000531639	down
GO:0042692	muscle cell differentiation	9	CAST, SYNE1, ACTA1, SEMA4C, MYOG, MBNL1, CAPN3, TPM1, SNTA1	0.000573974	down
GO:0060537	muscle tissue development	9	MYF6, ZFAND5, ACTA1, DMD, VAMP5, MYOG, MBNL1, TPM1, SNTA1	0.000711983	down
GO:0030036	actin cytoskeleton organization	12	TNXB, ACTA1, PDLIM7, GSN, XIRP2, CAPZA2, SSH2, PDLIM3, LMO7, DAAM1, CAPN3, TPM1	0.000783127	down
GO:0031589	cell-substrate adhesion	8	LYVE1, EPDR1, TEK, ACTN2, SGCE, LAMC1, ECM2, ADAM15	0.000801131	down
GO:0030155	regulation of cell adhesion	9	LAMA2, EMCN, ADAM10, S1PR1, GSN, PODXL, TGM2, ECM2, TPM1	0.00129296	down
GO:0030029	actin filament-based process	12	TNXB, ACTA1, PDLIM7, GSN, XIRP2, CAPZA2, SSH2, PDLIM3, LMO7, DAAM1, CAPN3, TPM1	0.00132103	down
GO:0014706	striated muscle tissue development	8	MYF6, ACTA1, DMD, VAMP5, MYOG, MBNL1, TPM1, SNTA1	0.00247279	down
GO:0007160	cell-matrix adhesion	7	LYVE1, EPDR1, TEK, ACTN2, SGCE, ECM2, ADAM15	0.00253693	down
GO:0051270	regulation of cell motion	10	RTN4, LAMA2, ADAM10, S1PR1, ETS1, CLIC4, TEK, HBEGF, TPM1, KDR	0.00309971	down
GO:0006793	phosphorus metabolic process	27	PPP2R3A, EFNA1, SSH2, NDUFS7, MAP3K5, SNRK, MORC3, TEK, CAMK2D, ADRA2B, GHR, SRPK3, PTPRB, GPD2, OBSCN, ADAM10, ALPK3, MET, PIM1, NPR1, PRKCH, KDR, DUSP1, PTP4A3, PPM1K, DUSP27, NRK	0.00433407	down
GO:0006796	phosphate metabolic process	27	PPP2R3A, EFNA1, SSH2, NDUFS7, MAP3K5, SNRK, MORC3, TEK, CAMK2D, ADRA2B, GHR, SRPK3, PTPRB, GPD2, OBSCN, ADAM10, ALPK3, MET, PIM1, NPR1, PRKCH, KDR, DUSP1, PTP4A3, PPM1K, DUSP27, NRK	0.00433407	down
GO:0030334	regulation of cell migration	9	RTN4, LAMA2, ADAM10, S1PR1, CLIC4, TEK, HBEGF, TPM1, KDR	0.00475201	down
GO:0042127	regulation of cell proliferation	23	TP53I11, ADAM10, ROGDI, FOXO1, CDH5, PURA, KDR, AGTR1, MNAT1, S1PR1, MORC3, CDKN2C, DBP, ETS1, TEK, TGM2, CAMK2D, TGIF1, HBEGF, LAMC1, PMP22, IL13RA1, TOB1	0.00512474	down
GO:0006941	striated muscle contraction	5	MYH1, CAMK2D, MYOM1, TPM1, CASQ2	0.00544	down
GO:0001944	vasculature development	11	RTN4, ZFAND5, EMCN, S1PR1, EPAS1, TGM2, FOXO1, ADRA2B, ANGPT2, CDH5, KDR	0.00568676	down
GO:0007010	cytoskeleton organization	15	TNXB, PDLIM7, ACTA1, CAPZA2, SSH2, PDLIM3, LMO7, DAAM1, TPM1, CAPN3, DES, GSN, XIRP2, DMD, SYNM	0.00787418	down
GO:0055002	striated muscle cell development	5	ACTA1, MYOG, CAPN3, TPM1, SNTA1	0.00840123	down
GO:0031032	actomyosin structure organization	4	ACTA1, LMO7, CAPN3, TPM1	0.00895932	down
GO:0006898	receptor-mediated endocytosis	5	MRC1, RAMP2, PDLIM7, STAB1, GHR	0.00897942	down
GO:0032535	regulation of cellular component size	11	RTN4, ADAM10, ACTA1, NEB, CDKN2C, GSN, CAPZA2, FHL1, NPR1, HBEGF, CCNG1	0.00953575	down
GO:0040012	regulation of locomotion	9	RTN4, LAMA2, ADAM10, S1PR1, CLIC4, TEK, HBEGF, TPM1, KDR	0.00998782	down
GO:0055001	muscle cell development	5	ACTA1, MYOG, CAPN3, TPM1, SNTA1	0.0108678	down
GO:0051146	striated muscle cell differentiation	6	CAST, ACTA1, MYOG, CAPN3, TPM1, SNTA1	0.0116724	down
GO:0048661	positive regulation of smooth muscle cell proliferation	4	MNAT1, S1PR1, TGM2, HBEGF	0.0118845	down
GO:0001568	blood vessel development	10	RTN4, EMCN, S1PR1, EPAS1, TGM2, FOXO1, ADRA2B, ANGPT2, CDH5, KDR	0.0139439	down
GO:0051482	elevation of cytosolic calcium ion concentration during G-protein signaling, coupled to IP3 second messenger (phospholipase C activating)	3	AGTR1, S1PR1, TGM2	0.014159	down
GO:0055065	metal ion homeostasis	9	AGTR1, ANXA7, S1PR1, ATP2A1, CAMK2D, RYR1, TGM2, ATP1A2, KDR	0.0143962	down
GO:0032103	positive regulation of response to external stimulus	5	AGTR1, ADAM10, S1PR1, TGM2, KDR	0.0170978	down
GO:0006470	protein amino acid dephosphorylation	7	PTPRB, PPP2R3A, PTP4A3, DUSP1, DUSP27, PPM1K, SSH2	0.0171857	down
GO:0007167	enzyme linked receptor protein signaling pathway	12	FMOD, FOS, ZFAND5, EFNA1, MET, TEK, HBEGF, FOXO1, ANGPTL1, TOB1, KDR, GHR	0.0173308	down
GO:0010927	cellular component assembly involved in morphogenesis	4	ACTA1, PMP22, CAPN3, TPM1	0.0178468	down
GO:0044236	multicellular organismal metabolic process	4	MNAT1, TNXB, ADAMTS2, GHR	0.0192052	down
GO:0030198	extracellular matrix organization	6	TNXB, OLFML2A, LAMC1, VWA1, ECM2, ADAMTS2	0.0225242	down
GO:0007169	transmembrane receptor protein tyrosine kinase signaling pathway	9	ZFAND5, EFNA1, MET, TEK, HBEGF, FOXO1, ANGPTL1, KDR, GHR	0.0231425	down
GO:0055074	calcium ion homeostasis	8	AGTR1, ANXA7, S1PR1, ATP2A1, RYR1, TGM2, ATP1A2, KDR	0.0268501	down
GO:0001525	angiogenesis	7	RTN4, EMCN, S1PR1, EPAS1, ADRA2B, ANGPT2, KDR	0.0273739	down
GO:0006468	protein amino acid phosphorylation	18	SRPK3, OBSCN, ADAM10, ALPK3, EFNA1, MET, PIM1, NPR1, PRKCH, KDR, MAP3K5, SNRK, MORC3, TEK, CAMK2D, NRK, ADRA2B, GHR	0.0295736	down
GO:0008016	regulation of heart contraction	5	DES, EPAS1, HBEGF, ATP1A2, TPM1	0.0312393	down
GO:0001558	regulation of cell growth	8	RTN4, AGTR1, ADAM10, CDKN2C, CAMK2D, NPR1, HBEGF, CISH	0.0313561	down
GO:0016311	dephosphorylation	7	PTPRB, PPP2R3A, PTP4A3, DUSP1, DUSP27, PPM1K, SSH2	0.032375	down
GO:0051384	response to glucocorticoid stimulus	5	C1QB, FOS, DUSP1, BCHE, GHR	0.0325434	down
GO:0006875	cellular metal ion homeostasis	8	AGTR1, ANXA7, S1PR1, ATP2A1, CAMK2D, RYR1, TGM2, ATP1A2	0.0326416	down
GO:0048660	regulation of smooth muscle cell proliferation	4	MNAT1, S1PR1, TGM2, HBEGF	0.0339354	down
GO:0000187	activation of MAPK activity	5	MAP3K5, EFNA1, MET, ADRA2B, GHR	0.0380751	down
GO:0043062	extracellular structure organization	7	TNXB, OLFML2A, LAMC1, VWA1, ECM2, ADAMTS2, SNTA1	0.0407636	down
GO:0008361	regulation of cell size	8	RTN4, ADAM10, ACTA1, CDKN2C, FHL1, NPR1, HBEGF, CCNG1	0.0408934	down
GO:0030239	myofibril assembly	3	ACTA1, CAPN3, TPM1	0.0411463	down
GO:0045859	regulation of protein kinase activity	11	MNAT1, MAP3K5, CDKN2C, EFNA1, MET, PIM1, ADRA2B, CCNG1, PKIA, CISH, GHR	0.0421001	down
GO:0031960	response to corticosteroid stimulus	5	C1QB, FOS, DUSP1, BCHE, GHR	0.0425564	down
GO:0048514	blood vessel morphogenesis	8	RTN4, EMCN, S1PR1, EPAS1, TGM2, ADRA2B, ANGPT2, KDR	0.0456059	down
GO:0010107	potassium ion import	2	ABCC9, KCNJ11	0.0456393	down
GO:0016525	negative regulation of angiogenesis	3	STAB1, NPR1, ANGPT2	0.0485897	down
GO:0032956	regulation of actin cytoskeleton organization	5	S1PR1, NEB, GSN, CAPZA2, TPM1	0.048975	down
GO:0006396	RNA processing	35	SCAF1, FUS, PUS1, TRA2B, TRA2A, RBM6, SART3, APLP1, HNRNPA3, HNRNPM, SRRT, RBM4B, MOV10, RRP1B, TARDBP, METTL1, HNRNPD, SNRNP70, LSM2, PRPF40B, RBM25, KHDRBS1, PABPN1, PDCD11, KHDRBS3, EXOSC7, HNRNPA2B1, SMAD3, SRPK1, HNRNPH3, SFPQ, KHSRP, CPSF4, RNPC3, CPSF1	1.37388e-08	up
GO:0006397	mRNA processing	26	FUS, SCAF1, TRA2B, TRA2A, APLP1, HNRNPA3, HNRNPM, RBM4B, MOV10, TARDBP, HNRNPD, LSM2, SNRNP70, PRPF40B, RBM25, KHDRBS1, PABPN1, KHDRBS3, HNRNPA2B1, SRPK1, HNRNPH3, SFPQ, KHSRP, RNPC3, CPSF4, CPSF1	1.72549e-08	up
GO:0016071	mRNA metabolic process	28	FUS, SCAF1, TRA2B, TRA2A, APLP1, HNRNPA3, HNRNPM, RBM4B, MOV10, WIBG, TARDBP, HNRNPD, LSM2, SNRNP70, PRPF40B, RBM25, KHDRBS1, PABPN1, KHDRBS3, SMG6, HNRNPA2B1, SRPK1, HNRNPH3, SFPQ, KHSRP, RNPC3, CPSF4, CPSF1	1.79894e-08	up
GO:0008380	RNA splicing	21	FUS, SCAF1, PABPN1, TRA2B, HNRNPA2B1, TRA2A, SRPK1, HNRNPA3, HNRNPM, RBM4B, HNRNPH3, TARDBP, SFPQ, HNRNPD, KHSRP, SNRNP70, RNPC3, LSM2, PRPF40B, RBM25, CPSF1	2.35878e-06	up
GO:0016458	gene silencing	9	DNMT3A, SRRT, MOV10, TNRC6C, XPO5, SND1, SMAD3, TNRC6A, SMARCA4	2.02614e-05	up
GO:0010629	negative regulation of gene expression	27	XPO5, CBX3, CBX5, SRRT, MOV10, TNRC6C, ATN1, WWP2, SND1, GATAD2A, PER1, RARB, TNRC6A, KHDRBS1, SATB1, DNMT3A, BMP2, EHMT1, YWHAB, FZD1, SMAD3, ILF3, HIPK2, DNMT1, RBM15, NCOR2, SMARCA4	2.25366e-05	up
GO:0040029	regulation of gene expression, epigenetic	10	ATRX, DNMT3A, SRRT, MOV10, SND1, GATAD2A, SMAD3, DNMT1, TNRC6A, SMARCA4	3.22717e-05	up
GO:0031047	gene silencing by RNA	7	SRRT, MOV10, TNRC6C, XPO5, SND1, SMAD3, TNRC6A	5.58049e-05	up
GO:0000398	nuclear mRNA splicing, via spliceosome	13	FUS, PABPN1, TRA2B, HNRNPA2B1, TRA2A, HNRNPA3, HNRNPM, HNRNPH3, HNRNPD, SNRNP70, LSM2, CPSF1, RBM25	9.22891e-05	up
GO:0000375	RNA splicing, via transesterification reactions	13	FUS, PABPN1, TRA2B, HNRNPA2B1, TRA2A, HNRNPA3, HNRNPM, HNRNPH3, HNRNPD, SNRNP70, LSM2, CPSF1, RBM25	9.22891e-05	up
GO:0000377	RNA splicing, via transesterification reactions with bulged adenosine as nucleophile	13	FUS, PABPN1, TRA2B, HNRNPA2B1, TRA2A, HNRNPA3, HNRNPM, HNRNPH3, HNRNPD, SNRNP70, LSM2, CPSF1, RBM25	9.22891e-05	up
GO:0010605	negative regulation of macromolecule metabolic process	32	XPO5, CBX3, CBX5, SRRT, MOV10, TNRC6C, ATN1, WWP2, SND1, GATAD2A, PER1, RARB, TNRC6A, KHDRBS1, PRKCA, DNMT3A, SATB1, BMP2, EHMT1, NF2, YWHAB, FZD1, SMAD3, ILF3, CDC20, HIPK2, DNMT1, PSME3, RBM15, NCOR2, EIF2AK4, SMARCA4	0.000162753	up
GO:0007507	heart development	14	NRP2, BMP2, GJA1, COL2A1, GJA5, SMO, CASP3, LY6E, ZMIZ1, MKKS, ADAMTS1, RARB, MYH10, SMARCA4	0.000623117	up
GO:0030705	cytoskeleton-dependent intracellular transport	7	NDE1, MACF1, MAP1S, HTT, KLC1, MYO9B, MYH10	0.000734723	up
GO:0003007	heart morphogenesis	8	SMO, BMP2, LY6E, ZMIZ1, MKKS, ADAMTS1, COL2A1, SMARCA4	0.000832987	up
GO:0016441	posttranscriptional gene silencing	5	SRRT, MOV10, SND1, SMAD3, TNRC6A	0.000858467	up
GO:0035194	posttranscriptional gene silencing by RNA	5	SRRT, MOV10, SND1, SMAD3, TNRC6A	0.000858467	up
GO:0010558	negative regulation of macromolecule biosynthetic process	24	KHDRBS1, PRKCA, DNMT3A, SATB1, BMP2, EHMT1, NF2, YWHAB, FZD1, SMAD3, CBX3, ILF3, CBX5, ATN1, HIPK2, GATAD2A, DNMT1, PER1, RARB, RBM15, TNRC6A, NCOR2, EIF2AK4, SMARCA4	0.00123508	up
GO:0051276	chromosome organization	22	DNMT3A, SATB1, EHMT1, TADA2A, SMG6, NASP, SETD1B, CBX3, NDC80, TRRAP, CBX5, NCAPD2, NCAPH, SMARCB1, SMARCC1, DNMT1, RNF168, ACIN1, CHD6, RTEL1, SMARCA4, CHD3	0.00140217	up
GO:0000902	cell morphogenesis	18	PRKCA, NRP2, RAB8A, BMP2, CCK, PTK7, GJA1, PIP5K1C, NDC80, SCRIB, SLIT2, ALCAM, SMO, NDE1, MACF1, MAP1S, MKKS, MYH10	0.00141884	up
GO:0048729	tissue morphogenesis	12	BMP2, LY6E, MACF1, NF2, HTT, PTK7, SMAD3, MKKS, TBX18, SCRIB, SLIT2, SMARCA4	0.00147903	up
GO:0031327	negative regulation of cellular biosynthetic process	24	KHDRBS1, PRKCA, DNMT3A, SATB1, BMP2, EHMT1, NF2, YWHAB, FZD1, SMAD3, CBX3, ILF3, CBX5, ATN1, HIPK2, GATAD2A, DNMT1, PER1, RARB, RBM15, TNRC6A, NCOR2, EIF2AK4, SMARCA4	0.00171585	up
GO:0009890	negative regulation of biosynthetic process	24	KHDRBS1, PRKCA, DNMT3A, SATB1, BMP2, EHMT1, NF2, YWHAB, FZD1, SMAD3, CBX3, ILF3, CBX5, ATN1, HIPK2, GATAD2A, DNMT1, PER1, RARB, RBM15, TNRC6A, NCOR2, EIF2AK4, SMARCA4	0.00224738	up
GO:0006259	DNA metabolic process	22	DNMT3A, XRCC2, SMG6, DTL, NASP, TP53BP1, GINS4, TTC5, MCM4, ATRX, RFC3, CASP3, XPC, SMARCB1, SFPQ, GATAD2A, DNMT1, RNF168, FEN1, RTEL1, TOP3B, NYNRIN	0.00235764	up
GO:0010970	microtubule-based transport	5	NDE1, MACF1, MAP1S, HTT, KLC1	0.00298617	up
GO:0043414	biopolymer methylation	7	ATRX, DNMT3A, EHMT1, METTL14, GATAD2A, DNMT1, PCMT1	0.00321616	up
GO:0016481	negative regulation of transcription	20	KHDRBS1, DNMT3A, SATB1, BMP2, EHMT1, YWHAB, FZD1, SMAD3, CBX3, ILF3, CBX5, ATN1, HIPK2, GATAD2A, DNMT1, PER1, RARB, RBM15, NCOR2, SMARCA4	0.00384561	up
GO:0022402	cell cycle process	23	KHDRBS1, HAUS5, XRCC2, SMAD3, ILF3, NDC80, CDC20, NCAPD2, AKT1, CCNB1, NCAPH, NDE1, NUMA1, CCND1, MACF1, CEP250, RCC2, CCND2, TARDBP, PSME3, ZNF318, MAP2K6, MYH10	0.00402035	up
GO:0010604	positive regulation of macromolecule metabolic process	31	CCK, ABLIM3, GJA1, SCRIB, AKT1, SMARCB1, WIBG, RNF168, AGRN, RARB, PRKCA, BMP2, TP53BP1, SMAD3, SIX2, ILF3, CREB5, CDC20, SREBF2, CCNB1, CCND1, CCND2, EBF3, ZMIZ1, SMARCC1, HIPK2, DNMT1, ZNF462, PSME3, RBM15, SMARCA4	0.00410177	up
GO:0032989	cellular component morphogenesis	18	PRKCA, NRP2, RAB8A, BMP2, CCK, PTK7, GJA1, PIP5K1C, NDC80, SCRIB, SLIT2, ALCAM, SMO, NDE1, MACF1, MAP1S, MKKS, MYH10	0.00438757	up
GO:0008219	cell death	27	FUS, CCK, LITAF, HTT, PREX1, YWHAB, SMAD3, RTKN, GJA1, REEP1, VAV2, SCRIB, DAPK1, APLP1, AKT1, SLTM, SLC11A2, CASP3, NISCH, ATN1, TIAM2, MAP1S, TARDBP, HIPK2, PSME3, ACIN1, RTEL1	0.00481243	up
GO:0030030	cell projection organization	17	PRKCA, NRP2, RAB8A, CCK, GJA1, PIP5K1C, MTSS1L, VAV2, PRKG1, SLIT2, AKT1, ALCAM, SMO, MACF1, MAP1S, MKKS, MYH10	0.00486952	up
GO:0035195	gene silencing by miRNA	4	SRRT, MOV10, SMAD3, TNRC6A	0.005005	up
GO:0010608	posttranscriptional regulation of gene expression	12	PRKCA, AKT1, SRRT, MOV10, TNRC6C, WIBG, SND1, HNRNPD, SMAD3, TNRC6A, EIF2AK4, APLP1	0.00503953	up
GO:0032259	methylation	7	ATRX, DNMT3A, EHMT1, METTL14, GATAD2A, DNMT1, PCMT1	0.00519424	up
GO:0016265	death	27	FUS, CCK, LITAF, HTT, PREX1, YWHAB, SMAD3, RTKN, GJA1, REEP1, VAV2, SCRIB, DAPK1, APLP1, AKT1, SLTM, SLC11A2, CASP3, NISCH, ATN1, TIAM2, MAP1S, TARDBP, HIPK2, PSME3, ACIN1, RTEL1	0.00523231	up
GO:0016568	chromatin modification	14	DNMT3A, EHMT1, TADA2A, SETD1B, NASP, CBX3, TRRAP, SMARCB1, SMARCC1, DNMT1, RNF168, CHD6, CHD3, SMARCA4	0.00530232	up
GO:0048598	embryonic morphogenesis	15	WNT5A, NF2, HTT, PTK7, SMAD3, SIX2, COL2A1, GJA5, SLIT2, MACF1, MKKS, RARB, FBN2, TBX18, SMARCA4	0.00547505	up
GO:0048858	cell projection morphogenesis	13	PRKCA, NRP2, ALCAM, SMO, RAB8A, CCK, MACF1, MAP1S, GJA1, MKKS, PIP5K1C, SLIT2, MYH10	0.00572534	up
GO:0045934	negative regulation of nucleobase, nucleoside, nucleotide and nucleic acid metabolic process	21	KHDRBS1, DNMT3A, SATB1, BMP2, EHMT1, NF2, YWHAB, FZD1, SMAD3, CBX3, ILF3, CBX5, ATN1, HIPK2, GATAD2A, DNMT1, PER1, RARB, RBM15, NCOR2, SMARCA4	0.00578413	up
GO:0006338	chromatin remodeling	6	SMARCB1, SMARCC1, NASP, CBX3, CHD6, SMARCA4	0.00627822	up
GO:0001707	mesoderm formation	5	MACF1, NF2, HTT, SMAD3, SLIT2	0.00660362	up
GO:0051172	negative regulation of nitrogen compound metabolic process	21	KHDRBS1, DNMT3A, SATB1, BMP2, EHMT1, NF2, YWHAB, FZD1, SMAD3, CBX3, ILF3, CBX5, ATN1, HIPK2, GATAD2A, DNMT1, PER1, RARB, RBM15, NCOR2, SMARCA4	0.00667279	up
GO:0032990	cell part morphogenesis	13	PRKCA, NRP2, ALCAM, SMO, RAB8A, CCK, MACF1, MAP1S, GJA1, MKKS, PIP5K1C, SLIT2, MYH10	0.00795809	up
GO:0048332	mesoderm morphogenesis	5	MACF1, NF2, HTT, SMAD3, SLIT2	0.00800926	up
GO:0030010	establishment of cell polarity	4	NDE1, PTK7, NDC80, SCRIB	0.00801041	up
GO:0045892	negative regulation of transcription, DNA-dependent	16	DNMT3A, SATB1, BMP2, EHMT1, SMAD3, CBX3, ILF3, CBX5, ATN1, HIPK2, GATAD2A, DNMT1, RARB, RBM15, NCOR2, SMARCA4	0.00833739	up
GO:0006915	apoptosis	23	CCK, LITAF, HTT, PREX1, YWHAB, SMAD3, GJA1, RTKN, VAV2, SCRIB, APLP1, DAPK1, SLC11A2, AKT1, SLTM, CASP3, NISCH, TIAM2, MAP1S, HIPK2, PSME3, ACIN1, RTEL1	0.0083443	up
GO:0001704	formation of primary germ layer	5	MACF1, NF2, HTT, SMAD3, SLIT2	0.00959813	up
GO:0051253	negative regulation of RNA metabolic process	16	DNMT3A, SATB1, BMP2, EHMT1, SMAD3, CBX3, ILF3, CBX5, ATN1, HIPK2, GATAD2A, DNMT1, RARB, RBM15, NCOR2, SMARCA4	0.00963154	up
GO:0015931	nucleobase, nucleoside, nucleotide and nucleic acid transport	8	PABPN1, POM121, SMG6, HNRNPA2B1, KHSRP, NUP93, GJA1, NUP188	0.00974045	up
GO:0012501	programmed cell death	23	CCK, LITAF, HTT, PREX1, YWHAB, SMAD3, GJA1, RTKN, VAV2, SCRIB, APLP1, DAPK1, SLC11A2, AKT1, SLTM, CASP3, NISCH, TIAM2, MAP1S, HIPK2, PSME3, ACIN1, RTEL1	0.00976948	up
GO:0045737	positive regulation of cyclin-dependent protein kinase activity	3	AKT1, CCND1, CCND2	0.0113113	up
GO:0000278	mitotic cell cycle	16	KHDRBS1, HAUS5, NDC80, CDC20, NCAPD2, AKT1, CCNB1, NCAPH, NDE1, CCND1, NUMA1, RCC2, CEP250, CCND2, TARDBP, PSME3	0.0116007	up
GO:0007049	cell cycle	27	HAUS5, XRCC2, AKT1, NDE1, NCAPH, NUMA1, CEP250, MACF1, SMARCB1, TARDBP, MAP2K6, TFDP1, KHDRBS1, NASP, SMAD3, ILF3, NDC80, CDC20, NCAPD2, CCNB1, CCND1, RGS2, RCC2, CCND2, PSME3, ZNF318, MYH10	0.012403	up
GO:0006305	DNA alkylation	4	ATRX, DNMT3A, GATAD2A, DNMT1	0.0133722	up
GO:0006306	DNA methylation	4	ATRX, DNMT3A, GATAD2A, DNMT1	0.0133722	up
GO:0051247	positive regulation of protein metabolic process	12	PRKCA, CCNB1, AKT1, CCND1, BMP2, CCK, CCND2, WIBG, DNMT1, GJA1, CDC20, PSME3	0.0137763	up
GO:0022403	cell cycle phase	17	KHDRBS1, HAUS5, XRCC2, NDC80, CDC20, ILF3, NCAPD2, AKT1, CCNB1, NCAPH, NDE1, CCND1, NUMA1, RCC2, CCND2, TARDBP, ZNF318	0.0140127	up
GO:0006325	chromatin organization	16	DNMT3A, SATB1, EHMT1, TADA2A, NASP, SETD1B, CBX3, TRRAP, CBX5, SMARCB1, SMARCC1, DNMT1, RNF168, CHD6, SMARCA4, CHD3	0.0140965	up
GO:0048812	neuron projection morphogenesis	11	PRKCA, NRP2, ALCAM, SMO, CCK, MACF1, MAP1S, GJA1, PIP5K1C, SLIT2, MYH10	0.0146004	up
GO:0015850	organic alcohol transport	4	SLC5A3, NISCH, LY6E, HIAT1	0.0149641	up
GO:0007369	gastrulation	6	MACF1, NF2, HTT, SMAD3, MKKS, SLIT2	0.0157131	up
GO:0033554	cellular response to stress	21	WNT5A, XRCC2, DTL, TP53BP1, TTC5, SLC11A2, ATRX, SMO, RFC3, CASP3, CCND1, XPC, SFPQ, HIPK2, INSIG1, RNF168, TNRC6A, FEN1, MAP2K6, EIF2AK4, RTEL1	0.0162131	up
GO:0050657	nucleic acid transport	7	PABPN1, POM121, SMG6, HNRNPA2B1, KHSRP, NUP93, NUP188	0.0163431	up
GO:0051236	establishment of RNA localization	7	PABPN1, POM121, SMG6, HNRNPA2B1, KHSRP, NUP93, NUP188	0.0163431	up
GO:0050658	RNA transport	7	PABPN1, POM121, SMG6, HNRNPA2B1, KHSRP, NUP93, NUP188	0.0163431	up
GO:0032582	negative regulation of gene-specific transcription	5	BMP2, SMAD3, RBM15, NCOR2, SMARCA4	0.0179458	up
GO:0035295	tube development	11	WNT5A, TNS3, BMP2, CRISPLD2, PTK7, MKKS, RARB, GJA5, SCRIB, LGR4, SLIT2	0.0179735	up
GO:0006403	RNA localization	7	PABPN1, POM121, SMG6, HNRNPA2B1, KHSRP, NUP93, NUP188	0.018726	up
GO:0007163	establishment or maintenance of cell polarity	5	NDE1, MACF1, PTK7, NDC80, SCRIB	0.0192273	up
GO:0031175	neuron projection development	12	PRKCA, NRP2, ALCAM, SMO, CCK, MACF1, MAP1S, GJA1, PIP5K1C, PRKG1, SLIT2, MYH10	0.0195378	up
GO:0043009	chordate embryonic development	14	XRCC2, HTT, NASP, PTK7, SIX2, COL2A1, SMO, PLCG1, LY6E, ZMIZ1, KIAA1217, TBX18, MYH10, SMARCA4	0.0231017	up
GO:0009628	response to abiotic stimulus	15	PRKCA, BMP2, XRCC2, HTT, GJA1, AKT1, SNN, CCND1, CASP3, XPC, CIRBP, MKKS, RNF168, HSPB3, FEN1	0.0236141	up
GO:0009792	embryonic development ending in birth or egg hatching	14	XRCC2, HTT, NASP, PTK7, SIX2, COL2A1, SMO, PLCG1, LY6E, ZMIZ1, KIAA1217, TBX18, MYH10, SMARCA4	0.0243437	up
GO:0032270	positive regulation of cellular protein metabolic process	11	PRKCA, CCNB1, AKT1, CCND1, BMP2, CCK, CCND2, WIBG, DNMT1, CDC20, PSME3	0.0255098	up
GO:0006974	response to DNA damage stimulus	15	XRCC2, DTL, TP53BP1, TTC5, ATRX, RFC3, CCND1, CASP3, XPC, SFPQ, HIPK2, RNF168, FEN1, MAP2K6, RTEL1	0.0260093	up
GO:0008637	apoptotic mitochondrial changes	4	AKT1, CASP3, CCK, SMAD3	0.0266798	up
GO:0048666	neuron development	14	PRKCA, NRP2, CCK, HTT, GJA1, PIP5K1C, PRKG1, SLIT2, ALCAM, SMO, MACF1, MAP1S, AGRN, MYH10	0.0270719	up
GO:0006730	one-carbon metabolic process	7	ATRX, DNMT3A, EHMT1, METTL14, GATAD2A, DNMT1, PCMT1	0.0306125	up
GO:0006304	DNA modification	4	ATRX, DNMT3A, GATAD2A, DNMT1	0.0314121	up
GO:0034330	cell junction organization	5	NF2, SMAD3, GJA1, ACTN1, GJA5	0.0315083	up
GO:0006357	regulation of transcription from RNA polymerase II promoter	24	DNMT3A, SATB1, BMP2, EHMT1, LITAF, ABLIM3, SMAD3, SIX2, MED22, SREBF2, ATN1, SMARCB1, SMARCC1, ZMIZ1, HIPK2, DNMT1, ZNF462, RARB, AGRN, RBM15, NCOR2, SMARCA4, CHD3, TFDP1	0.032497	up
GO:0009411	response to UV	5	AKT1, CCND1, CASP3, XPC, FEN1	0.0351561	up
GO:0051028	mRNA transport	6	PABPN1, POM121, SMG6, KHSRP, NUP93, NUP188	0.0361206	up
GO:0045216	cell-cell junction organization	4	NF2, SMAD3, GJA1, GJA5	0.0365539	up
GO:0001501	skeletal system development	13	PRKCA, WNT5A, BMP2, TCOF1, SIX2, SMAD3, COL2A1, GJA5, SMO, PTN, KIAA1217, PAPSS1, CDH11	0.0370393	up
GO:0030900	forebrain development	8	ATRX, NDE1, HTT, MKKS, PRKG1, APLP1, MYH10, SMARCA4	0.0413472	up
GO:0050432	catecholamine secretion	2	NISCH, LY6E	0.0415478	up
GO:0007010	cytoskeleton organization	16	HAUS5, NF2, ABLIM3, PREX1, ACTN1, MYO9B, NDC80, EVL, PRKG1, NDE1, NISCH, CEP250, MACF1, MAP1S, PACSIN2, MYH10	0.0421782	up
GO:0007067	mitosis	10	CCNB1, NCAPH, NDE1, NUMA1, HAUS5, RCC2, TARDBP, CDC20, NDC80, NCAPD2	0.042948	up
GO:0000280	nuclear division	10	CCNB1, NCAPH, NDE1, NUMA1, HAUS5, RCC2, TARDBP, CDC20, NDC80, NCAPD2	0.042948	up
GO:0032268	regulation of cellular protein metabolic process	17	PRKCA, BMP2, CCK, NF2, YWHAB, CDC20, APLP1, AKT1, CCNB1, CCND1, TNRC6C, CCND2, WIBG, DNMT1, PSME3, TNRC6A, EIF2AK4	0.0431496	up
GO:0051412	response to corticosterone stimulus	3	PRKCA, CCND1, PTGS1	0.0434222	up
GO:0031401	positive regulation of protein modification process	9	PRKCA, CCNB1, CCND1, BMP2, CCK, CCND2, DNMT1, CDC20, PSME3	0.0436556	up
GO:0008203	cholesterol metabolic process	6	TM7SF2, MBTPS2, INSIG1, HMGCS1, IDI1, SREBF2	0.0442499	up
GO:0045893	positive regulation of transcription, DNA-dependent	17	BMP2, TP53BP1, ABLIM3, SMAD3, SIX2, CREB5, ILF3, SREBF2, SMARCB1, SMARCC1, ZMIZ1, HIPK2, ZNF462, RARB, AGRN, RBM15, SMARCA4	0.0443292	up
GO:0000279	M phase	13	HAUS5, XRCC2, NDC80, CDC20, ILF3, NCAPD2, CCNB1, NUMA1, NDE1, NCAPH, RCC2, TARDBP, ZNF318	0.0452756	up
GO:0000087	M phase of mitotic cell cycle	10	CCNB1, NCAPH, NDE1, NUMA1, HAUS5, RCC2, TARDBP, CDC20, NDC80, NCAPD2	0.0470655	up
GO:0006401	RNA catabolic process	5	SMG6, EXOSC7, WIBG, HNRNPD, FEN1	0.0475095	up
GO:0051254	positive regulation of RNA metabolic process	17	BMP2, TP53BP1, ABLIM3, SMAD3, SIX2, CREB5, ILF3, SREBF2, SMARCB1, SMARCC1, ZMIZ1, HIPK2, ZNF462, RARB, AGRN, RBM15, SMARCA4	0.0476815	up

## Sheet: E45 vs B3
Table S8-3 Significantly enriched Gene ontology (GO) biological processes for the targets of DE miRNAs between E45 and B3.
GO ID	GO Terms	Gene number	Genes	p-value	change direction(DE miRNAs)
GO:0015980	energy derivation by oxidation of organic compounds	23	NDUFB6, ACO2, ALDH5A1, IL6ST, NDUFA9, NDUFAB1, IDH3B, CRAT, GYG1, PPP1R3A, ACADVL, NDUFS7, NDUFV3, SDHB, NNT, PPP1R2, NDUFV1, DLD, SDHD, NDUFV2, IDH2, SUCLA2, NDUFS1	3.50885e-14	down
GO:0045333	cellular respiration	17	NDUFB6, ACO2, ALDH5A1, NDUFA9, NDUFAB1, IDH3B, NDUFV3, NDUFS7, SDHB, NNT, NDUFV1, DLD, SDHD, NDUFV2, IDH2, SUCLA2, NDUFS1	3.62789e-11	down
GO:0006091	generation of precursor metabolites and energy	28	NDUFB6, ENPP1, IL6ST, NDUFAB1, NDUFS7, ETFDH, IDH2, SUCLA2, NDUFS1, ACO2, ALDH5A1, NDUFA9, IDH3B, CRAT, GYG1, PPP1R3A, PFKM, ACADVL, NDUFV3, SDHB, NNT, PPP1R2, NDUFV1, NDUFV2, PGM1, DLD, SDHD, ATP5C1	4.91356e-11	down
GO:0006084	acetyl-CoA metabolic process	10	SDHB, ACSS1, NNT, ACO2, MLYCD, DLD, SDHD, IDH2, IDH3B, SUCLA2	3.92232e-09	down
GO:0007517	muscle organ development	19	MYF6, ZFAND5, CAV2, ACADM, ACTA1, CRYAB, FHL1, MBNL1, TPM1, CAPN3, LAMA2, NEB, DMD, ITGB1BP2, NDUFV2, VAMP5, TGFBR3, JPH1, SNTA1	1.1112e-07	down
GO:0006936	muscle contraction	16	MYH1, ACTA1, MYBPC1, CRYAB, ACTN2, PDE4D, TRIM63, TPM1, MYOT, DES, MYOM2, RYR1, SMPX, TMOD4, STBD1, SNTA1	2.15998e-07	down
GO:0006732	coenzyme metabolic process	16	GPD1, NAMPT, MOCS2, ACO2, ALDH5A1, IDH3B, COQ9, SDHB, ACSS1, NNT, MLYCD, DLD, SDHD, GPX3, IDH2, SUCLA2	2.15998e-07	down
GO:0010927	cellular component assembly involved in morphogenesis	9	CD9, NEURL, ACTA1, NEURL2, PMP22, CAPN3, UBE2B, TPM1, TMOD1	2.90581e-07	down
GO:0022904	respiratory electron transport chain	11	NDUFV3, NDUFS7, SDHB, NDUFB6, ALDH5A1, NDUFA9, NDUFV1, NDUFV2, DLD, NDUFAB1, NDUFS1	3.16073e-07	down
GO:0003012	muscle system process	16	MYH1, ACTA1, MYBPC1, CRYAB, ACTN2, PDE4D, TRIM63, TPM1, MYOT, DES, MYOM2, RYR1, SMPX, TMOD4, STBD1, SNTA1	7.27632e-07	down
GO:0006120	mitochondrial electron transport, NADH to ubiquinone	9	NDUFV3, NDUFS7, NDUFB6, NDUFA9, NDUFV1, NDUFV2, DLD, NDUFAB1, NDUFS1	1.02701e-06	down
GO:0006631	fatty acid metabolic process	17	ACADM, PTGES2, ALDH5A1, ACADS, STAT5A, STAT5B, ADIPOR2, NDUFAB1, CRAT, DECR1, HADHB, ACADVL, ACSL1, MLYCD, ETFDH, QKI, GHR	1.18586e-06	down
GO:0022900	electron transport chain	13	NDUFB6, NDUFA9, ALDH5A1, NDUFAB1, NDUFS7, NDUFV3, SDHB, NDUFV1, SDHD, DLD, NDUFV2, ETFDH, NDUFS1	1.6965e-06	down
GO:0006099	tricarboxylic acid cycle	7	SDHB, NNT, ACO2, SDHD, IDH2, IDH3B, SUCLA2	3.41267e-06	down
GO:0046356	acetyl-CoA catabolic process	7	SDHB, NNT, ACO2, SDHD, IDH2, IDH3B, SUCLA2	3.41267e-06	down
GO:0055114	oxidation reduction	31	NDUFB6, EGLN3, NDUFAB1, AASS, NDUFS7, GPX3, IDH2, ETFDH, GFOD1, NDUFS1, GPD2, GPD1, PTGR2, ACADM, NDUFA9, ACADS, ALDH5A1, IDH3B, DECR1, GMPR, PHYH, MSRB3, ACADVL, NDUFV3, SDHB, NNT, HSDL2, NDUFV1, NDUFV2, DLD, SDHD	4.44218e-06	down
GO:0051186	cofactor metabolic process	16	GPD1, NAMPT, MOCS2, ACO2, ALDH5A1, IDH3B, COQ9, SDHB, ACSS1, NNT, MLYCD, DLD, SDHD, GPX3, IDH2, SUCLA2	4.72449e-06	down
GO:0009109	coenzyme catabolic process	7	SDHB, NNT, ACO2, SDHD, IDH2, IDH3B, SUCLA2	7.41948e-06	down
GO:0034440	lipid oxidation	8	ACADVL, ACADM, ACADS, ETFDH, ADIPOR2, DECR1, CRAT, HADHB	7.53021e-06	down
GO:0019395	fatty acid oxidation	8	ACADVL, ACADM, ACADS, ETFDH, ADIPOR2, DECR1, CRAT, HADHB	7.53021e-06	down
GO:0042773	ATP synthesis coupled electron transport	9	NDUFV3, NDUFS7, NDUFB6, NDUFA9, NDUFV1, NDUFV2, DLD, NDUFAB1, NDUFS1	9.82412e-06	down
GO:0042775	mitochondrial ATP synthesis coupled electron transport	9	NDUFV3, NDUFS7, NDUFB6, NDUFA9, NDUFV1, NDUFV2, DLD, NDUFAB1, NDUFS1	9.82412e-06	down
GO:0006635	fatty acid beta-oxidation	7	ACADVL, ACADM, ACADS, ETFDH, DECR1, CRAT, HADHB	1.17599e-05	down
GO:0006105	succinate metabolic process	5	SDHB, ALDH5A1, STAT5A, STAT5B, GHR	1.48754e-05	down
GO:0010033	response to organic substance	32	CAV2, ENPP1, IL6ST, STAT5A, STAT5B, CALCOCO2, FOXO1, C1S, KCNJ11, FOS, ACSL1, GSN, GHR, TXNIP, SOCS2, ACTA1, ACADS, CRYAB, ADIPOR2, LIFR, IL6R, UBE2B, LPIN1, C1QB, CDKN1A, GLUL, DUSP1, RYR1, TGFBR3, EIF2AK2, DNAJB4, PPP1R15A	1.75868e-05	down
GO:0042692	muscle cell differentiation	12	CAV2, ACADM, ACTA1, SEMA4C, QKI, MBNL1, NEURL2, CAPN3, IFRD1, TPM1, SNTA1, TMOD1	1.89836e-05	down
GO:0051187	cofactor catabolic process	7	SDHB, NNT, ACO2, SDHD, IDH2, IDH3B, SUCLA2	2.19103e-05	down
GO:0006103	2-oxoglutarate metabolic process	5	STAT5A, STAT5B, DLD, IDH3B, GHR	2.44224e-05	down
GO:0060537	muscle tissue development	12	MYF6, CAV2, ZFAND5, ACADM, ACTA1, DMD, NDUFV2, VAMP5, TGFBR3, MBNL1, TPM1, SNTA1	2.57901e-05	down
GO:0050801	ion homeostasis	22	MPZ, ENPP1, IL6ST, NPR1, ATP1A2, ABCB6, KCNJ11, AGTR1, ANXA7, CD9, S1PR1, ATP2A2, ATP2A1, DLD, RYR1, TGM2, QKI, PMP22, JPH1, CUTC, NDUFS1, IFI6	3.62182e-05	down
GO:0043648	dicarboxylic acid metabolic process	7	SDHB, ALDH5A1, STAT5A, STAT5B, DLD, IDH3B, GHR	3.81554e-05	down
GO:0048878	chemical homeostasis	25	ENPP1, IL6ST, FOXO3, KCNJ11, AGTR1, CD9, ANXA7, S1PR1, TGM2, QKI, JPH1, CUTC, NDUFS1, MPZ, EPAS1, NPR1, PFKM, ATP1A2, ABCB6, ATP2A2, DLD, ATP2A1, RYR1, PMP22, IFI6	4.32385e-05	down
GO:0009060	aerobic respiration	7	SDHB, NNT, ACO2, SDHD, IDH2, IDH3B, SUCLA2	4.53228e-05	down
GO:0009062	fatty acid catabolic process	7	ACADVL, ACADM, ACADS, ETFDH, DECR1, CRAT, HADHB	5.35293e-05	down
GO:0009725	response to hormone stimulus	20	TXNIP, CAV2, SOCS2, ENPP1, ACTA1, CRYAB, ACADS, STAT5A, STAT5B, ADIPOR2, FOXO1, IL6R, LPIN1, UBE2B, FOS, C1QB, CDKN1A, DUSP1, TGFBR3, GHR	7.63176e-05	down
GO:0019725	cellular homeostasis	23	MPZ, PTGES2, ENPP1, IL6ST, ATP1A2, PFKM, ABCB6, KCNJ11, AGTR1, ANXA7, CD9, S1PR1, ATP2A2, DMD, ATP2A1, DLD, RYR1, TGM2, QKI, PMP22, JPH1, NDUFS1, IFI6	8.19485e-05	down
GO:0014706	striated muscle tissue development	11	MYF6, CAV2, ACADM, ACTA1, DMD, NDUFV2, VAMP5, TGFBR3, MBNL1, TPM1, SNTA1	8.89643e-05	down
GO:0042592	homeostatic process	31	PTGES2, ENPP1, IL6ST, STAT5A, CSF1, STAT5B, FOXO3, KCNJ11, ANXA7, CD9, AGTR1, S1PR1, DMD, TGM2, QKI, JPH1, CUTC, NDUFS1, MPZ, EPAS1, NPR1, ATP1A2, PFKM, ABCB6, ATP2A2, ATP2A1, DLD, RYR1, TGFBR3, PMP22, IFI6	9.36769e-05	down
GO:0006873	cellular ion homeostasis	20	MPZ, ENPP1, IL6ST, ATP1A2, KCNJ11, ABCB6, AGTR1, ANXA7, CD9, S1PR1, ATP2A2, ATP2A1, DLD, RYR1, TGM2, QKI, PMP22, JPH1, NDUFS1, IFI6	9.82002e-05	down
GO:0006119	oxidative phosphorylation	10	NDUFV3, NDUFS7, NDUFB6, NDUFA9, NDUFV1, NDUFV2, DLD, NDUFAB1, ATP5C1, NDUFS1	0.000101092	down
GO:0055082	cellular chemical homeostasis	20	MPZ, ENPP1, IL6ST, ATP1A2, KCNJ11, ABCB6, AGTR1, ANXA7, CD9, S1PR1, ATP2A2, ATP2A1, DLD, RYR1, TGM2, QKI, PMP22, JPH1, NDUFS1, IFI6	0.000120855	down
GO:0006006	glucose metabolic process	12	GPD2, GPD1, PPP1R2, ALDH5A1, CRYAB, IL6ST, PGM1, PDK4, PPP1R3A, PFKM, GYG1, KCNJ11	0.000162639	down
GO:0031032	actomyosin structure organization	6	ACTA1, LMO7, NEURL2, CAPN3, TPM1, TMOD1	0.000163547	down
GO:0032870	cellular response to hormone stimulus	11	FOS, SOCS2, DUSP1, ENPP1, STAT5A, STAT5B, ADIPOR2, FOXO1, UBE2B, LPIN1, GHR	0.00022376	down
GO:0006101	citrate metabolic process	4	ACO2, STAT5A, STAT5B, GHR	0.000224165	down
GO:0009719	response to endogenous stimulus	20	TXNIP, CAV2, SOCS2, ENPP1, ACTA1, CRYAB, ACADS, STAT5A, STAT5B, ADIPOR2, FOXO1, IL6R, LPIN1, UBE2B, FOS, C1QB, CDKN1A, DUSP1, TGFBR3, GHR	0.00027122	down
GO:0048545	response to steroid hormone stimulus	13	TXNIP, CAV2, SOCS2, ACTA1, CRYAB, ACADS, STAT5B, IL6R, FOS, C1QB, CDKN1A, DUSP1, GHR	0.000306532	down
GO:0019318	hexose metabolic process	13	GPD2, GPD1, IL6ST, CRYAB, ALDH5A1, PFKFB3, PDK4, PPP1R3A, GYG1, PFKM, KCNJ11, PPP1R2, PGM1	0.000306532	down
GO:0030258	lipid modification	8	ACADVL, ACADM, ACADS, ETFDH, ADIPOR2, DECR1, CRAT, HADHB	0.000325419	down
GO:0060396	growth hormone receptor signaling pathway	4	SOCS2, STAT5A, STAT5B, GHR	0.000353631	down
GO:0055002	striated muscle cell development	7	CAV2, ACTA1, NEURL2, CAPN3, TPM1, SNTA1, TMOD1	0.000434096	down
GO:0060416	response to growth hormone stimulus	4	SOCS2, STAT5A, STAT5B, GHR	0.000523008	down
GO:0030239	myofibril assembly	5	ACTA1, NEURL2, CAPN3, TPM1, TMOD1	0.000590287	down
GO:0055001	muscle cell development	7	CAV2, ACTA1, NEURL2, CAPN3, TPM1, SNTA1, TMOD1	0.000649888	down
GO:0043603	cellular amide metabolic process	7	NAMPT, GPD1, STAT5A, STAT5B, DLD, IDH3B, GHR	0.000649888	down
GO:0007010	cytoskeleton organization	20	CAV2, NEURL, PDLIM7, ACTA1, CRYAB, SSH2, PDLIM3, LMO7, LPIN1, TPM1, UBE2B, CAPN3, ANK1, DES, XIRP2, GSN, DMD, SYNM, NEURL2, TMOD1	0.000677552	down
GO:0051262	protein tetramerization	6	ALDH5A1, GPX3, AASS, ACTN2, DECR1, PFKM	0.000808188	down
GO:0006796	phosphate metabolic process	34	CAV2, PPP2R3A, NDUFB6, ENPP1, STAT5A, SSH2, NDUFAB1, PINK1, NDUFS7, MORC3, TEK, EEF2K, ADRA2B, NDUFS1, GHR, PTPRB, GPD2, GPD1, OBSCN, ALPK3, NDUFA9, PDK4, AK3, NPR1, NDUFV3, MAPK6, DUSP1, NDUFV1, NDUFV2, DLD, ATP5C1, TGFBR3, PPM1L, EIF2AK2	0.000827744	down
GO:0006793	phosphorus metabolic process	34	CAV2, PPP2R3A, NDUFB6, ENPP1, STAT5A, SSH2, NDUFAB1, PINK1, NDUFS7, MORC3, TEK, EEF2K, ADRA2B, NDUFS1, GHR, PTPRB, GPD2, GPD1, OBSCN, ALPK3, NDUFA9, PDK4, AK3, NPR1, NDUFV3, MAPK6, DUSP1, NDUFV1, NDUFV2, DLD, ATP5C1, TGFBR3, PPM1L, EIF2AK2	0.000827744	down
GO:0046449	creatinine metabolic process	3	STAT5A, STAT5B, GHR	0.00106504	down
GO:0005996	monosaccharide metabolic process	13	GPD2, GPD1, IL6ST, CRYAB, ALDH5A1, PFKFB3, PDK4, PPP1R3A, GYG1, PFKM, KCNJ11, PPP1R2, PGM1	0.00112121	down
GO:0030155	regulation of cell adhesion	10	LAMA2, CD36, S1PR1, GSN, STAT5A, PODXL, CSF1, STAT5B, TGM2, TPM1	0.00121347	down
GO:0032103	positive regulation of response to external stimulus	7	AGTR1, S1PR1, IL6ST, STAT5A, STAT5B, TGM2, IL6R	0.00132275	down
GO:0051289	protein homotetramerization	5	ALDH5A1, GPX3, ACTN2, DECR1, PFKM	0.00136857	down
GO:0051146	striated muscle cell differentiation	8	CAV2, ACADM, ACTA1, NEURL2, CAPN3, TPM1, SNTA1, TMOD1	0.00141161	down
GO:0007519	skeletal muscle tissue development	7	MYF6, CAV2, ACTA1, DMD, VAMP5, MBNL1, SNTA1	0.00155329	down
GO:0060538	skeletal muscle organ development	7	MYF6, CAV2, ACTA1, DMD, VAMP5, MBNL1, SNTA1	0.00155329	down
GO:0006508	proteolysis	35	THOP1, UBE2G1, ENPEP, C1S, UBAC1, FEM1A, CRADD, LNPEP, DDI2, SQSTM1, MAP1LC3B, WWP1, TPP2, PSMD4, RNF34, USP13, CFLAR, RNF144B, SOCS2, UBE2L6, UBR3, TRIM63, CAPN3, UBE2B, CISH, C1QB, DLD, FBXO30, FBXO31, FBXO32, USP25, ASB5, NEURL2, CTSH, ADAM15	0.00162017	down
GO:0006549	isoleucine metabolic process	3	STAT5A, STAT5B, GHR	0.00210335	down
GO:0000255	allantoin metabolic process	3	STAT5A, STAT5B, GHR	0.00210335	down
GO:0050729	positive regulation of inflammatory response	5	AGTR1, IL6ST, STAT5A, STAT5B, TGM2	0.00236391	down
GO:0045768	positive regulation of anti-apoptosis	5	CDKN1A, DUSP1, IL6ST, LIFR, IL6R	0.00236391	down
GO:0043434	response to peptide hormone stimulus	10	CAV2, SOCS2, ENPP1, STAT5A, STAT5B, FOXO1, IL6R, UBE2B, LPIN1, GHR	0.00271508	down
GO:0006163	purine nucleotide metabolic process	11	ATP1B1, ADSSL1, ATP2A2, ENPP1, ATP2A1, AK3, ATP5C1, NPR1, PDE4D, ATP1A2, NDUFS1	0.00293782	down
GO:0012501	programmed cell death	23	CFLAR, OBSCN, RNF144B, NOL3, AIMP2, EGLN3, FOXO3, ITM2B, CRADD, DDIT4, VDAC1, TSC22D3, GSN, SQSTM1, BAG3, ATP2A1, BAG2, TGM2, EIF2AK2, RNF34, PPP1R15A, NDUFS1, IFI6	0.00306825	down
GO:0019941	modification-dependent protein catabolic process	22	RNF144B, SOCS2, UBE2G1, UBE2L6, UBR3, TRIM63, UBAC1, FEM1A, UBE2B, CISH, MAP1LC3B, SQSTM1, WWP1, FBXO30, FBXO31, PSMD4, FBXO32, ASB5, NEURL2, USP25, RNF34, USP13	0.00315663	down
GO:0043632	modification-dependent macromolecule catabolic process	22	RNF144B, SOCS2, UBE2G1, UBE2L6, UBR3, TRIM63, UBAC1, FEM1A, UBE2B, CISH, MAP1LC3B, SQSTM1, WWP1, FBXO30, FBXO31, PSMD4, FBXO32, ASB5, NEURL2, USP25, RNF34, USP13	0.00315663	down
GO:0044242	cellular lipid catabolic process	7	ACADVL, ACADM, ACADS, ETFDH, DECR1, CRAT, HADHB	0.00319392	down
GO:0019530	taurine metabolic process	3	STAT5A, STAT5B, GHR	0.00346166	down
GO:0006573	valine metabolic process	3	STAT5A, STAT5B, GHR	0.00346166	down
GO:0070120	ciliary neurotrophic factor-mediated signaling pathway	3	IL6ST, LIFR, IL6R	0.00346166	down
GO:0032355	response to estradiol stimulus	6	TXNIP, SOCS2, DUSP1, CRYAB, STAT5B, GHR	0.00352467	down
GO:0051384	response to glucocorticoid stimulus	7	C1QB, FOS, CDKN1A, DUSP1, ACADS, IL6R, GHR	0.00363662	down
GO:0051270	regulation of cell motion	11	LAMA2, S1PR1, IL6ST, DLL4, CSF1, TEK, STAT5B, TGFBR3, RRAS, IL6R, TPM1	0.00384816	down
GO:0030036	actin cytoskeleton organization	12	ACTA1, PDLIM7, GSN, XIRP2, SSH2, PDLIM3, LMO7, NEURL2, CAPN3, TPM1, LPIN1, TMOD1	0.00400042	down
GO:0019915	lipid storage	4	CD36, ENPP1, STAT5A, STAT5B	0.00447695	down
GO:0030334	regulation of cell migration	10	LAMA2, S1PR1, IL6ST, DLL4, CSF1, TEK, TGFBR3, RRAS, IL6R, TPM1	0.00501663	down
GO:0006085	acetyl-CoA biosynthetic process	3	ACSS1, MLYCD, DLD	0.00512753	down
GO:0046395	carboxylic acid catabolic process	8	ACADVL, ACADM, ACADS, ETFDH, AASS, DECR1, CRAT, HADHB	0.00523264	down
GO:0016054	organic acid catabolic process	8	ACADVL, ACADM, ACADS, ETFDH, AASS, DECR1, CRAT, HADHB	0.00523264	down
GO:0051603	proteolysis involved in cellular protein catabolic process	22	RNF144B, SOCS2, UBE2G1, UBE2L6, UBR3, TRIM63, UBAC1, FEM1A, UBE2B, CISH, MAP1LC3B, SQSTM1, WWP1, FBXO30, FBXO31, PSMD4, FBXO32, ASB5, NEURL2, USP25, RNF34, USP13	0.00530463	down
GO:0006915	apoptosis	22	CFLAR, OBSCN, RNF144B, NOL3, AIMP2, EGLN3, FOXO3, ITM2B, CRADD, DDIT4, VDAC1, TSC22D3, GSN, SQSTM1, BAG3, ATP2A1, BAG2, EIF2AK2, RNF34, PPP1R15A, NDUFS1, IFI6	0.00545307	down
GO:0070482	response to oxygen levels	9	CDKN1A, ATP1B1, NOL3, EPAS1, STAT5B, EGLN3, RYR1, UBE2B, DDIT4	0.00550293	down
GO:0044257	cellular protein catabolic process	22	RNF144B, SOCS2, UBE2G1, UBE2L6, UBR3, TRIM63, UBAC1, FEM1A, UBE2B, CISH, MAP1LC3B, SQSTM1, WWP1, FBXO30, FBXO31, PSMD4, FBXO32, ASB5, NEURL2, USP25, RNF34, USP13	0.00554431	down
GO:0031960	response to corticosteroid stimulus	7	C1QB, FOS, CDKN1A, DUSP1, ACADS, IL6R, GHR	0.00554955	down
GO:0045767	regulation of anti-apoptosis	5	CDKN1A, DUSP1, IL6ST, LIFR, IL6R	0.00565585	down
GO:0007167	enzyme linked receptor protein signaling pathway	15	TXNIP, ZFAND5, SOCS2, IL6ST, STAT5A, STAT5B, LIFR, FOXO1, ECSIT, FOS, TEK, TGFBR3, PPM1L, GHR, TOB1	0.00584288	down
GO:0051259	protein oligomerization	10	CAV2, ALDH5A1, CRYAB, GPX3, TGM2, AASS, ACTN2, DECR1, PFKM, TRIM21	0.00604931	down
GO:0055066	di-, tri-valent inorganic cation homeostasis	12	AGTR1, ANXA7, S1PR1, ATP2A2, IL6ST, ATP2A1, RYR1, TGM2, ATP1A2, CUTC, JPH1, ABCB6	0.00605489	down
GO:0006916	anti-apoptosis	11	CFLAR, NOL3, SOCS2, SQSTM1, CRYAB, BAG3, STAT5A, STAT5B, TGM2, FOXO1, IFI6	0.0060593	down
GO:0007259	JAK-STAT cascade	5	SOCS2, IL6ST, STAT5A, STAT5B, GHR	0.00620986	down
GO:0044057	regulation of system process	14	LAMA2, AGTR1, DES, EPAS1, ATP2A2, IL6ST, ATP2A1, MYBPH, PINK1, NPR1, ATP1A2, BHLHE40, TPM1, TPM3	0.00624476	down
GO:0006790	sulfur metabolic process	8	MOCS2, ENPP1, ALDH5A1, STAT5A, STAT5B, GPX3, DLD, GHR	0.00633454	down
GO:0030029	actin filament-based process	12	ACTA1, PDLIM7, GSN, XIRP2, SSH2, PDLIM3, LMO7, NEURL2, CAPN3, TPM1, LPIN1, TMOD1	0.00643143	down
GO:0030163	protein catabolic process	22	RNF144B, SOCS2, UBE2G1, UBE2L6, UBR3, TRIM63, UBAC1, FEM1A, UBE2B, CISH, MAP1LC3B, SQSTM1, WWP1, FBXO30, FBXO31, PSMD4, FBXO32, ASB5, NEURL2, USP25, RNF34, USP13	0.00775335	down
GO:0006874	cellular calcium ion homeostasis	10	AGTR1, ANXA7, S1PR1, ATP2A2, IL6ST, ATP2A1, RYR1, TGM2, ATP1A2, JPH1	0.0083201	down
GO:0009165	nucleotide biosynthetic process	10	NAMPT, ATP1B1, ADSSL1, ATP2A2, ATP2A1, AK3, ATP5C1, NPR1, ATP1A2, CMPK2	0.00914277	down
GO:0051260	protein homooligomerization	7	ALDH5A1, CRYAB, GPX3, TGM2, ACTN2, DECR1, PFKM	0.00943483	down
GO:0009991	response to extracellular stimulus	11	FOS, CDKN1A, ATG9A, ACSL1, ACTA1, DUSP1, GSN, ACADS, IL6ST, ADIPOR2, GHR	0.00943619	down
GO:0016310	phosphorylation	26	OBSCN, CAV2, NDUFB6, ALPK3, NDUFA9, STAT5A, PDK4, AK3, NDUFAB1, PINK1, NPR1, NDUFS7, NDUFV3, MAPK6, MORC3, NDUFV1, TEK, DLD, NDUFV2, ATP5C1, EEF2K, TGFBR3, ADRA2B, EIF2AK2, NDUFS1, GHR	0.00981178	down
GO:0055074	calcium ion homeostasis	10	AGTR1, ANXA7, S1PR1, ATP2A2, IL6ST, ATP2A1, RYR1, TGM2, ATP1A2, JPH1	0.00983267	down
GO:0009108	coenzyme biosynthetic process	6	NAMPT, ACSS1, MOCS2, MLYCD, DLD, COQ9	0.00996161	down
GO:0008219	cell death	24	CFLAR, OBSCN, RNF144B, NOL3, AIMP2, EGLN3, FOXO3, ITM2B, CRADD, DDIT4, VDAC1, TSC22D3, GSN, SQSTM1, HSPB8, BAG3, ATP2A1, BAG2, TGM2, EIF2AK2, RNF34, PPP1R15A, NDUFS1, IFI6	0.0100757	down
GO:0051188	cofactor biosynthetic process	7	NAMPT, ACSS1, MOCS2, MLYCD, DLD, COQ9, SUCLA2	0.0103985	down
GO:0019221	cytokine-mediated signaling pathway	6	IL6ST, STAT5A, STAT5B, LIFR, TGM2, IL6R	0.010566	down
GO:0016265	death	24	CFLAR, OBSCN, RNF144B, NOL3, AIMP2, EGLN3, FOXO3, ITM2B, CRADD, DDIT4, VDAC1, TSC22D3, GSN, SQSTM1, HSPB8, BAG3, ATP2A1, BAG2, TGM2, EIF2AK2, RNF34, PPP1R15A, NDUFS1, IFI6	0.0106914	down
GO:0048660	regulation of smooth muscle cell proliferation	5	MFN2, S1PR1, STAT5B, TGM2, IL6R	0.0111137	down
GO:0040012	regulation of locomotion	10	LAMA2, S1PR1, IL6ST, DLL4, CSF1, TEK, TGFBR3, RRAS, IL6R, TPM1	0.0111676	down
GO:0040018	positive regulation of multicellular organism growth	4	STAT5A, CSF1, STAT5B, GHR	0.011445	down
GO:0034654	nucleobase, nucleoside, nucleotide and nucleic acid biosynthetic process	10	NAMPT, ATP1B1, ADSSL1, ATP2A2, ATP2A1, AK3, ATP5C1, NPR1, ATP1A2, CMPK2	0.0115459	down
GO:0034404	nucleobase, nucleoside and nucleotide biosynthetic process	10	NAMPT, ATP1B1, ADSSL1, ATP2A2, ATP2A1, AK3, ATP5C1, NPR1, ATP1A2, CMPK2	0.0115459	down
GO:0030005	cellular di-, tri-valent inorganic cation homeostasis	11	AGTR1, ANXA7, S1PR1, ATP2A2, IL6ST, ATP2A1, RYR1, TGM2, ATP1A2, JPH1, ABCB6	0.0116002	down
GO:0006600	creatine metabolic process	3	STAT5A, STAT5B, GHR	0.0118514	down
GO:0006599	phosphagen metabolic process	3	STAT5A, STAT5B, GHR	0.0118514	down
GO:0009141	nucleoside triphosphate metabolic process	8	ATP1B1, ATP2A2, ENPP1, ATP2A1, AK3, ATP5C1, ATP1A2, NDUFS1	0.0125231	down
GO:0006875	cellular metal ion homeostasis	10	AGTR1, ANXA7, S1PR1, ATP2A2, IL6ST, ATP2A1, RYR1, TGM2, ATP1A2, JPH1	0.0126701	down
GO:0006979	response to oxidative stress	9	TXNIP, FOS, DUSP1, EPAS1, CRYAB, GPX3, ETFDH, CA3, TPM1	0.0131175	down
GO:0000302	response to reactive oxygen species	6	TXNIP, FOS, DUSP1, CRYAB, GPX3, TPM1	0.013966	down
GO:0042391	regulation of membrane potential	8	CD9, MPZ, DLD, QKI, PMP22, KCNJ11, NDUFS1, IFI6	0.0140471	down
GO:0001666	response to hypoxia	8	ATP1B1, NOL3, EPAS1, STAT5B, EGLN3, RYR1, UBE2B, DDIT4	0.0140471	down
GO:0006107	oxaloacetate metabolic process	3	STAT5A, STAT5B, GHR	0.0146301	down
GO:0046034	ATP metabolic process	7	ATP1B1, ATP2A2, ATP2A1, AK3, ATP5C1, ATP1A2, NDUFS1	0.014956	down
GO:0043627	response to estrogen stimulus	7	TXNIP, CAV2, SOCS2, DUSP1, CRYAB, STAT5B, GHR	0.014956	down
GO:0007595	lactation	4	CAV2, NEURL, STAT5A, STAT5B	0.0156368	down
GO:0009150	purine ribonucleotide metabolic process	8	ATP1B1, ADSSL1, ATP2A2, ATP2A1, AK3, ATP5C1, ATP1A2, NDUFS1	0.0162797	down
GO:0030278	regulation of ossification	6	PDLIM7, ENPP1, IL6ST, CSF1, IL6R, TOB1	0.0163236	down
GO:0055065	metal ion homeostasis	10	AGTR1, ANXA7, S1PR1, ATP2A2, IL6ST, ATP2A1, RYR1, TGM2, ATP1A2, JPH1	0.0165366	down
GO:0034097	response to cytokine stimulus	6	FOS, IL6ST, LIFR, CALCOCO2, IL6R, GHR	0.0171647	down
GO:0042517	positive regulation of tyrosine phosphorylation of Stat3 protein	3	IL6ST, IL6R, GHR	0.0176592	down
GO:0051240	positive regulation of multicellular organismal process	11	DDX58, LAMA2, IL6ST, STAT5A, CSF1, ATP2A1, STAT5B, PINK1, IL6R, TPM1, GHR	0.0183518	down
GO:0007568	aging	7	C1QB, FOS, SOCS2, MORC3, GSN, CRYAB, DLD	0.0184209	down
GO:0032989	cellular component morphogenesis	15	NEURL, ACTA1, RTN4RL1, LIFR, TPM1, UBE2B, CAPN3, MFN2, CD9, ANK1, DMD, TGFBR3, NEURL2, PMP22, TMOD1	0.0197059	down
GO:0048661	positive regulation of smooth muscle cell proliferation	4	S1PR1, STAT5B, TGM2, IL6R	0.0205829	down
GO:0051482	elevation of cytosolic calcium ion concentration during G-protein signaling, coupled to IP3 second messenger (phospholipase C activating)	3	AGTR1, S1PR1, TGM2	0.0209285	down
GO:0045214	sarcomere organization	3	NEURL2, CAPN3, TPM1	0.0209285	down
GO:0044265	cellular macromolecule catabolic process	23	RNF144B, SOCS2, UBE2G1, UBE2L6, UBR3, TRIM63, UBAC1, FEM1A, UBE2B, CISH, CD36, MAP1LC3B, SQSTM1, WWP1, FBXO30, FBXO31, PSMD4, FBXO32, ASB5, NEURL2, USP25, RNF34, USP13	0.02094	down
GO:0055080	cation homeostasis	12	AGTR1, ANXA7, S1PR1, ATP2A2, IL6ST, ATP2A1, RYR1, TGM2, ATP1A2, CUTC, JPH1, ABCB6	0.0209556	down
GO:0044271	nitrogen compound biosynthetic process	13	NAMPT, ADSSL1, ATP1B1, MOCS2, AK3, NPR1, ATP1A2, CMPK2, GLUL, ATP2A2, ATP2A1, ATP5C1, SUCLA2	0.021521	down
GO:0070665	positive regulation of leukocyte proliferation	5	CDKN1A, IL6ST, STAT5A, CSF1, STAT5B	0.021608	down
GO:0032946	positive regulation of mononuclear cell proliferation	5	CDKN1A, IL6ST, STAT5A, CSF1, STAT5B	0.021608	down
GO:0009259	ribonucleotide metabolic process	8	ATP1B1, ADSSL1, ATP2A2, ATP2A1, AK3, ATP5C1, ATP1A2, NDUFS1	0.0222013	down
GO:0006164	purine nucleotide biosynthetic process	8	ATP1B1, ADSSL1, ATP2A2, ATP2A1, AK3, ATP5C1, NPR1, ATP1A2	0.0229403	down
GO:0030003	cellular cation homeostasis	11	AGTR1, ANXA7, S1PR1, ATP2A2, IL6ST, ATP2A1, RYR1, TGM2, ATP1A2, JPH1, ABCB6	0.0234975	down
GO:0009205	purine ribonucleoside triphosphate metabolic process	7	ATP1B1, ATP2A2, ATP2A1, AK3, ATP5C1, ATP1A2, NDUFS1	0.0241408	down
GO:0009152	purine ribonucleotide biosynthetic process	7	ATP1B1, ADSSL1, ATP2A2, ATP2A1, AK3, ATP5C1, ATP1A2	0.0241408	down
GO:0010744	positive regulation of foam cell differentiation	3	AGTR1, CD36, CSF1	0.0244276	down
GO:0009057	macromolecule catabolic process	24	RNF144B, SOCS2, UBE2G1, UBE2L6, UBR3, TRIM63, UBAC1, FEM1A, UBE2B, CISH, LYVE1, CD36, MAP1LC3B, SQSTM1, WWP1, FBXO30, FBXO31, PSMD4, FBXO32, ASB5, NEURL2, USP25, RNF34, USP13	0.0245108	down
GO:0009199	ribonucleoside triphosphate metabolic process	7	ATP1B1, ATP2A2, ATP2A1, AK3, ATP5C1, ATP1A2, NDUFS1	0.0250447	down
GO:0051480	cytosolic calcium ion homeostasis	7	AGTR1, S1PR1, IL6ST, RYR1, TGM2, ATP1A2, JPH1	0.0250447	down
GO:0009968	negative regulation of signal transduction	10	MFN2, SOCS2, ENPP1, IL6ST, RGS5, CILP, DDIT4L, CISH, TOB1, DDIT4	0.0254944	down
GO:0042127	regulation of cell proliferation	24	TXNIP, NAMPT, CAV2, IL6ST, STAT5A, CSF1, STAT5B, EGLN3, LIFR, FOXO1, IL6R, SESN1, MFN2, AGTR1, CD9, CDKN1A, S1PR1, MORC3, TEK, TGM2, TGFBR3, PMP22, EIF2AK2, TOB1	0.0265482	down
GO:0006754	ATP biosynthetic process	6	ATP1B1, ATP2A2, ATP2A1, AK3, ATP5C1, ATP1A2	0.0271844	down
GO:0005977	glycogen metabolic process	4	PPP1R2, IL6ST, PPP1R3A, GYG1	0.0283617	down
GO:0009144	purine nucleoside triphosphate metabolic process	7	ATP1B1, ATP2A2, ATP2A1, AK3, ATP5C1, ATP1A2, NDUFS1	0.0288856	down
GO:0044042	glucan metabolic process	4	PPP1R2, IL6ST, PPP1R3A, GYG1	0.0305174	down
GO:0006073	cellular glucan metabolic process	4	PPP1R2, IL6ST, PPP1R3A, GYG1	0.0305174	down
GO:0009260	ribonucleotide biosynthetic process	7	ATP1B1, ADSSL1, ATP2A2, ATP2A1, AK3, ATP5C1, ATP1A2	0.0309437	down
GO:0032535	regulation of cellular component size	11	CDKN1A, ACTA1, NEB, ENPP1, GSN, CRYAB, FHL1, ADIPOR2, TGFBR3, NPR1, CCNG1	0.0344808	down
GO:0009081	branched chain family amino acid metabolic process	3	STAT5A, STAT5B, GHR	0.0362075	down
GO:0048584	positive regulation of response to stimulus	10	AGTR1, C1QB, S1PR1, IL6ST, STAT5A, STAT5B, TGM2, SEMA4C, IL6R, C1S	0.0365888	down
GO:0046544	development of secondary male sexual characteristics	2	STAT5A, STAT5B	0.0376357	down
GO:0009206	purine ribonucleoside triphosphate biosynthetic process	6	ATP1B1, ATP2A2, ATP2A1, AK3, ATP5C1, ATP1A2	0.0388559	down
GO:0006575	cellular amino acid derivative metabolic process	8	ACADM, EPAS1, ALDH5A1, STAT5A, STAT5B, GPX3, NPR1, GHR	0.0392659	down
GO:0032869	cellular response to insulin stimulus	5	ENPP1, FOXO1, UBE2B, LPIN1, GHR	0.0402488	down
GO:0009201	ribonucleoside triphosphate biosynthetic process	6	ATP1B1, ATP2A2, ATP2A1, AK3, ATP5C1, ATP1A2	0.0403147	down
GO:0009145	purine nucleoside triphosphate biosynthetic process	6	ATP1B1, ATP2A2, ATP2A1, AK3, ATP5C1, ATP1A2	0.0403147	down
GO:0042516	regulation of tyrosine phosphorylation of Stat3 protein	3	IL6ST, IL6R, GHR	0.0405308	down
GO:0006511	ubiquitin-dependent protein catabolic process	10	RNF144B, SQSTM1, UBE2G1, UBR3, FBXO31, PSMD4, TRIM63, USP25, UBE2B, USP13	0.0417557	down
GO:0031099	regeneration	5	MYF6, CDKN1A, RTN4RL1, GSN, LIFR	0.0421126	down
GO:0010035	response to inorganic substance	9	TXNIP, FOS, CDKN1A, DUSP1, GSN, CRYAB, GPX3, CAPN3, TPM1	0.0421581	down
GO:0008361	regulation of cell size	9	CDKN1A, ACTA1, ENPP1, CRYAB, FHL1, ADIPOR2, TGFBR3, NPR1, CCNG1	0.0432207	down
GO:0009142	nucleoside triphosphate biosynthetic process	6	ATP1B1, ATP2A2, ATP2A1, AK3, ATP5C1, ATP1A2	0.0448889	down
GO:0045646	regulation of erythrocyte differentiation	3	STAT5A, STAT5B, FOXO3	0.0450375	down
GO:0006090	pyruvate metabolic process	4	GPD2, GPD1, PGM1, DLD	0.0451943	down
GO:0007272	ensheathment of neurons	4	CD9, MPZ, QKI, PMP22	0.0451943	down
GO:0008366	axon ensheathment	4	CD9, MPZ, QKI, PMP22	0.0451943	down
GO:0051591	response to cAMP	4	FOS, DUSP1, IL6R, C1S	0.0451943	down
GO:0010648	negative regulation of cell communication	10	MFN2, SOCS2, ENPP1, IL6ST, RGS5, CILP, DDIT4L, CISH, TOB1, DDIT4	0.0475791	down
GO:0034599	cellular response to oxidative stress	4	FOS, EPAS1, GPX3, TPM1	0.0479251	down
GO:0045667	regulation of osteoblast differentiation	4	PDLIM7, IL6ST, IL6R, TOB1	0.0479251	down
GO:0006112	energy reserve metabolic process	4	PPP1R2, IL6ST, PPP1R3A, GYG1	0.0479251	down
GO:0006937	regulation of muscle contraction	5	ATP2A1, MYBPH, ATP1A2, TPM1, TPM3	0.0479925	down
GO:0009628	response to abiotic stimulus	13	TXNIP, ACTA1, CRYAB, IL6R, ATP1A2, GMPR, UBE2B, FOS, ANXA7, CDKN1A, DUSP1, HSPB8, DNAJB4	0.0487122	down
GO:0051276	chromosome organization	100	XRCC5, HMGN2, XRCC6, CBX3, CBX1, CBX5, BRPF1, SMARCD1, HIRIP3, TLK1, ACIN1, TADA2A, RCOR1, MTA2, HMG20A, ARID1A, HMG20B, NCAPD2, MAD2L1, EP300, BAZ1B, RFC1, KDM2A, SMARCAL1, PRDM5, PAF1, RNF20, SUV420H1, SMARCA4, MEAF6, HMGB1, SETD1B, TRRAP, NIPBL, SMARCB1, LEO1, RNF168, DNMT3A, EHMT1, SMG6, NDC80, CTR9, TNKS1BP1, HDAC3, SMARCC1, MSL1, SMARCC2, SUPT16H, DNMT1, SMC1A, NCOR1, RERE, HDAC7, RSF1, HP1…	1.00903e-13	up
GO:0016568	chromatin modification	67	RSF1, CBX3, CTCF, BRPF1, PRMT6, SMARCD1, TLK1, KDM5A, KDM5B, KDM5C, TBL1XR1, TADA2A, RCOR1, HMG20A, ARID1A, HMG20B, RBBP7, EYA3, EP300, KDM2A, BAZ1B, SMARCAL1, ASH1L, PRDM5, PAF1, USP22, JMJD1C, NSD1, RNF20, SUV420H1, SMARCA4, MEAF6, ING3, ING2, SETD1B, TRRAP, ARID2, CHD9, CHD8, SMARCB1, LEO1, RNF168, KDM3A, CHD6, BAZ2A, CHD4, TERF2, CHD3, DNMT3A, CSRP2BP, EHMT1, NASP, SIRT1, CTR9, PHF17, HDAC3, …	6.89132e-13	up
GO:0016071	mRNA metabolic process	81	SCAF1, RALY, PRPF4B, RBM15B, U2AF2, RBM5, SYNCRIP, WTAP, PNN, DCPS, RBM4B, APP, WIBG, TARDBP, PCBP2, MAGOHB, LSM2, RBM10, LUC7L3, PABPN1, KHDRBS1, SRPK2, PHRF1, KHDRBS3, PTBP1, HNRNPA2B1, SF1, PRPF3, HNRNPR, SRPK1, HNRNPU, PRPF6, PCF11, AQR, VEGFA, KHSRP, CPSF7, CPSF6, SNRNP40, RBM39, THOC2, KIAA1429, FUS, FIP1L1, TRA2B, PPIL1, TRA2A, SF3B4, APLP1, POLR2A, SF3B2, HNRNPA3, SF3B1, HNRNPM, HNRNPD, P…	1.17828e-12	up
GO:0008380	RNA splicing	68	RALY, SCAF1, PRPF4B, RBM15B, U2AF2, RBM5, SYNCRIP, ZNF638, WTAP, PNN, RBM4B, TARDBP, PCBP2, MAGOHB, LSM2, RBM10, LUC7L3, PABPN1, SRPK2, PTBP1, HNRNPA2B1, SF1, PRPF3, HNRNPR, SRPK1, HNRNPU, PRPF6, PCF11, AQR, KHSRP, CPSF7, SNRNP40, RBM39, THOC2, KIAA1429, FUS, TRA2B, PPIL1, TRA2A, SF3B4, POLR2A, SF3B2, HNRNPA3, HNRNPM, SF3B1, PPP2CA, HNRNPD, PRPF40B, PPWD1, RBM25, DHX9, TSEN54, YTHDC1, CASC3, DDX5…	1.29691e-12	up
GO:0006397	mRNA processing	73	SCAF1, RALY, PRPF4B, RBM15B, U2AF2, RBM5, SYNCRIP, WTAP, PNN, RBM4B, APP, TARDBP, PCBP2, MAGOHB, LSM2, RBM10, LUC7L3, PABPN1, KHDRBS1, SRPK2, PHRF1, KHDRBS3, PTBP1, HNRNPA2B1, SF1, PRPF3, HNRNPR, SRPK1, HNRNPU, PRPF6, PCF11, AQR, KHSRP, CPSF7, CPSF6, SNRNP40, RBM39, THOC2, KIAA1429, FUS, FIP1L1, TRA2B, PPIL1, TRA2A, SF3B4, POLR2A, SF3B2, APLP1, HNRNPA3, SF3B1, HNRNPM, HNRNPD, PRPF40B, PPWD1, RBM2…	2.57591e-12	up
GO:0006325	chromatin organization	80	HMGN2, RSF1, HP1BP3, ARID4B, CBX3, CTCF, CBX1, CBX5, BRPF1, PRMT6, SMARCD1, HIRIP3, TLK1, KDM5A, KDM5B, KDM5C, TBL1XR1, TADA2A, MTA2, RCOR1, HMG20A, HMG20B, ARID1A, RBBP7, EYA3, EP300, KDM2A, BAZ1B, SMARCAL1, ASH1L, PRDM5, PAF1, USP22, JMJD1C, NSD1, RNF20, SUV420H1, SMARCA4, MEAF6, HMGB1, ING3, ING2, SETD1B, TRRAP, TSPYL4, TSPYL5, ARID2, CHD9, CHD8, CDYL, SMARCB1, CHD2, LEO1, RNF168, KDM3A, CHD6,…	1.00793e-11	up
GO:0045449	regulation of transcription	341	MEF2C, HMGN2, XRCC6, FST, MED25, ZNF250, REST, MED22, MED20, CTNNB1, MAMSTR, SIN3B, BRPF1, APP, ZFP90, RARB, TIGD5, BCL7A, IKBKAP, TADA2A, ZNF646, RCOR1, HMG20A, HMG20B, ZNF500, RFC1, PRDM4, BAZ1B, ZNF783, PRDM5, MED18, VEGFA, SMARCAL1, MNT, PIAS2, VGLL3, TGIF2, CDCA7L, PIAS1, SUV420H1, CRTC3, ZNF79, ZNF133, ZNF131, AFAP1L2, CALR, PFN1, TCF20, ATN1, HTATSF1, LEO1, AGRN, TCF4, HIP1, KLF5, ZNF398, …	1.80133e-11	up
GO:0031327	negative regulation of cellular biosynthetic process	101	MEF2C, JDP2, RBM15B, FST, TGFB3, CBX3, REST, CTNNB1, CBX5, SIN3B, RARB, BCL7A, MTA2, GABPA, EIF2AK1, TRIM33, EIF2AK3, EIF2AK4, RAD17, SMARCA4, EID1, PALM, HMGB1, TIPIN, CALR, ATN1, TCF4, ZNF423, DNMT3A, BMP2, EHMT1, KLF12, SMAD7, RYBP, CD276, SMAD3, SMAD2, SKI, UBP1, HDAC3, SMARCC2, JAZF1, DNMT1, SMURF2, NCOR1, NCOR2, RSF1, CTCF, ZEB2, ZEB1, GLI2, PDCD4, EDNRA, PRMT6, NR2F2, ZNF496, KDM5B, KHDRBS…	3.17661e-10	up
GO:0010629	negative regulation of gene expression	93	MEF2C, JDP2, RSF1, RBM15B, DICER1, FST, CBX3, CTCF, ZEB2, ZEB1, REST, GLI2, PDCD4, CBX5, CTNNB1, SIN3B, DGCR8, WWP2, SND1, PRMT6, RARB, NR2F2, BCL7A, ZNF496, KDM5B, EGR1, KHDRBS1, TBL1XR1, MTA2, LDB1, GABPA, TP53, SPEN, RBBP7, MBD1, MXD3, PURB, GZF1, TARBP2, TRIM33, NAB2, LCOR, NSD1, SMARCA4, BTAF1, EID1, HMGB1, CALR, ZNF174, SRRT, SORBS3, TNRC6C, ATN1, LANCL2, HINFP, GATAD2A, PEX14, TNRC6B, TCF4…	4.72348e-10	up
GO:0009890	negative regulation of biosynthetic process	102	MEF2C, JDP2, RBM15B, FST, TGFB3, CBX3, REST, CTNNB1, CBX5, SIN3B, RARB, BCL7A, MTA2, GABPA, EIF2AK1, TRIM33, EIF2AK3, EIF2AK4, RAD17, SMARCA4, EID1, PALM, HMGB1, TIPIN, CALR, ATN1, TCF4, ZNF423, DNMT3A, BMP2, EHMT1, KLF12, SMAD7, RYBP, CD276, SMAD3, SMAD2, SKI, UBP1, HDAC3, SMARCC2, JAZF1, DNMT1, SMURF2, NCOR1, NCOR2, RSF1, CTCF, ZEB2, ZEB1, GLI2, PDCD4, EDNRA, PRMT6, NR2F2, ZNF496, KDM5B, KHDRBS…	4.90739e-10	up
GO:0010558	negative regulation of macromolecule biosynthetic process	98	MEF2C, JDP2, RBM15B, FST, TGFB3, CBX3, REST, CTNNB1, CBX5, SIN3B, RARB, BCL7A, MTA2, GABPA, EIF2AK1, TRIM33, EIF2AK3, EIF2AK4, RAD17, SMARCA4, EID1, HMGB1, TIPIN, CALR, ATN1, TCF4, ZNF423, DNMT3A, BMP2, EHMT1, KLF12, SMAD7, RYBP, CD276, SMAD3, SMAD2, SKI, UBP1, HDAC3, SMARCC2, JAZF1, DNMT1, SMURF2, NCOR1, NCOR2, RSF1, CTCF, ZEB2, ZEB1, GLI2, PDCD4, PRMT6, NR2F2, ZNF496, KDM5B, PRKCA, KHDRBS1, EGR…	7.86482e-10	up
GO:0045934	negative regulation of nucleobase, nucleoside, nucleotide and nucleic acid metabolic process	92	MEF2C, JDP2, RSF1, RBM15B, FST, TGFB3, CBX3, CTCF, ZEB2, ZEB1, REST, GLI2, PDCD4, CBX5, CTNNB1, EDNRA, SIN3B, PRMT6, RARB, NR2F2, BCL7A, KDM5B, ZNF496, EGR1, KHDRBS1, TBL1XR1, MTA2, LDB1, GABPA, TP53, SPEN, RBBP7, MBD1, MXD3, PURB, GZF1, TRIM33, NAB2, LCOR, NSD1, RAD17, SMARCA4, PALM, EID1, BTAF1, HMGB1, TIPIN, CALR, ZNF174, SORBS3, ATN1, LANCL2, HINFP, GATAD2A, PEX14, TCF4, BAZ2A, TERF2, ZNF423,…	2.40238e-09	up
GO:0006350	transcription	275	MEF2C, SCAF1, MED25, ZNF250, REST, MED22, MED20, CTNNB1, PRIM1, MAMSTR, SIN3B, BRPF1, ZFP90, RARB, IKBKAP, TADA2A, RCOR1, HMG20A, HMG20B, ZNF500, RFC1, BAZ1B, PRDM4, ZNF783, PRDM5, MED18, MNT, PIAS2, VGLL3, TGIF2, CDCA7L, PIAS1, SUV420H1, CRTC3, ZNF79, ZNF133, ZNF131, MYEF2, TCF20, HTATSF1, LEO1, TCF4, HIP1, KLF5, ZNF398, ZNF623, SMAD9, KLF12, SMAD7, SUB1, TP53BP1, MAML1, ASXL1, MAML2, RYBP, SMAD…	4.56269e-09	up
GO:0051172	negative regulation of nitrogen compound metabolic process	92	MEF2C, JDP2, RSF1, RBM15B, FST, TGFB3, CBX3, CTCF, ZEB2, ZEB1, REST, GLI2, PDCD4, CBX5, CTNNB1, EDNRA, SIN3B, PRMT6, RARB, NR2F2, BCL7A, KDM5B, ZNF496, EGR1, KHDRBS1, TBL1XR1, MTA2, LDB1, GABPA, TP53, SPEN, RBBP7, MBD1, MXD3, PURB, GZF1, TRIM33, NAB2, LCOR, NSD1, RAD17, SMARCA4, PALM, EID1, BTAF1, HMGB1, TIPIN, CALR, ZNF174, SORBS3, ATN1, LANCL2, HINFP, GATAD2A, PEX14, TCF4, BAZ2A, TERF2, ZNF423,…	4.80498e-09	up
GO:0016481	negative regulation of transcription	84	MEF2C, JDP2, RSF1, RBM15B, FST, CBX3, CTCF, ZEB2, ZEB1, REST, GLI2, PDCD4, CBX5, CTNNB1, SIN3B, PRMT6, RARB, NR2F2, BCL7A, ZNF496, KDM5B, EGR1, KHDRBS1, TBL1XR1, MTA2, LDB1, GABPA, TP53, SPEN, RBBP7, MBD1, MXD3, PURB, GZF1, TRIM33, NAB2, LCOR, NSD1, SMARCA4, BTAF1, EID1, HMGB1, CALR, ZNF174, SORBS3, ATN1, LANCL2, HINFP, GATAD2A, PEX14, TCF4, BAZ2A, ZNF423, DNMT3A, BMP2, EHMT1, TBX3, KLF12, SMAD7,…	5.43104e-09	up
GO:0010605	negative regulation of macromolecule metabolic process	117	MEF2C, JDP2, RBM15B, FST, TGFB3, CBX3, REST, CBX5, CTNNB1, SIN3B, WWP2, SND1, RAB23, RARB, BCL7A, ANAPC5, MTA2, GABPA, EIF2AK1, MAD2L1, TRIM33, EIF2AK3, EIF2AK4, RAD17, SMARCA4, EID1, HMGB1, TIPIN, CALR, ATN1, TCF4, ZNF423, DNMT3A, BMP2, EHMT1, KLF12, SMAD7, RYBP, CD276, SMAD3, CDC20, SMAD2, SKI, UBP1, HDAC3, SMARCC2, JAZF1, DNMT1, SMURF2, NCOR1, NCOR2, RSF1, DICER1, CTCF, ZEB2, ZEB1, GLI2, PDCD4…	1.88564e-08	up
GO:0045892	negative regulation of transcription, DNA-dependent	67	MEF2C, JDP2, RSF1, FST, CBX3, CTCF, REST, ZEB1, GLI2, CBX5, CTNNB1, SIN3B, PRMT6, RARB, NR2F2, ZNF496, KDM5B, EGR1, TBL1XR1, LDB1, MTA2, GABPA, TP53, SPEN, RBBP7, PURB, GZF1, LCOR, NSD1, SMARCA4, HMGB1, EID1, CALR, ZNF174, SORBS3, ATN1, GATAD2A, PEX14, TCF4, BAZ2A, DNMT3A, BMP2, EHMT1, TBX3, KLF12, VHL, JARID2, SMAD7, RYBP, TRIM27, SMAD3, ILF3, SKI, SMAD2, PHF12, TRIM24, SNAI2, SIRT1, HDAC3, ID1,…	7.85352e-08	up
GO:0006396	RNA processing	91	SCAF1, RALY, PRPF4B, RBM15B, U2AF2, DICER1, RBM5, SYNCRIP, RBM6, ZNF638, WTAP, PNN, RBM4B, DDX17, APP, DGCR8, TARDBP, CTU2, PCBP2, MAGOHB, LSM2, RBM10, LUC7L3, FTSJ3, PABPN1, KHDRBS1, SRPK2, PHRF1, KHDRBS3, PTBP1, HNRNPA2B1, SF1, PRPF3, MRM1, HNRNPR, SRPK1, HNRNPU, PRPF6, PCF11, TARBP2, AQR, LARP7, KHSRP, CPSF7, CPSF6, SNRNP40, RBM39, THOC2, TRUB2, KIAA1429, FUS, FIP1L1, TRA2B, PPIL1, TRA2A, SF3B…	1.28494e-07	up
GO:0051253	negative regulation of RNA metabolic process	67	MEF2C, JDP2, RSF1, FST, CBX3, CTCF, REST, ZEB1, GLI2, CBX5, CTNNB1, SIN3B, PRMT6, RARB, NR2F2, ZNF496, KDM5B, EGR1, TBL1XR1, LDB1, MTA2, GABPA, TP53, SPEN, RBBP7, PURB, GZF1, LCOR, NSD1, SMARCA4, HMGB1, EID1, CALR, ZNF174, SORBS3, ATN1, GATAD2A, PEX14, TCF4, BAZ2A, DNMT3A, BMP2, EHMT1, TBX3, KLF12, VHL, JARID2, SMAD7, RYBP, TRIM27, SMAD3, ILF3, SKI, SMAD2, PHF12, TRIM24, SNAI2, SIRT1, HDAC3, ID1,…	1.50525e-07	up
GO:0007010	cytoskeleton organization	76	RHOJ, MTSS1, PDLIM7, PREX1, WASF2, PRKG1, TTL, CTNNB1, TTLL3, DSTN, NDE1, NISCH, CEP250, CAP1, FMNL3, ARHGEF2, ACTN4, ACTN1, ARHGEF17, TMSB10, PCM1, UBE2C, FLNB, VASP, THY1, ARHGEF11, EPB41L2, RND3, SS18, SCIN, CFL1, SDCBP, HAUS8, DBN1, HAUS4, TRIOBP, PALM, HAUS6, HAUS5, CNN3, ABLIM3, CALD1, CETN3, MYO9B, CYTH2, CALR, DAAM1, RCC1, PFN1, PTK2, MACF1, OBSL1, GRID2IP, CLASP1, ACTC1, NF2, TAOK2, NF1,…	2.49575e-07	up
GO:0006357	regulation of transcription from RNA polymerase II promoter	111	MEF2C, JDP2, XRCC6, FST, TGFB3, MED22, MED20, CTNNB1, APP, SMARCD1, RARB, IKBKAP, MTA2, GABPA, SIX2, AHR, EP300, SMARCAL1, VEGFA, MED18, SMARCA4, EID1, HMGB1, CAMTA2, LITAF, CALR, ARNT, PFN1, ATN1, SMARCB1, HTATSF1, AGRN, TCF4, TFDP1, DNMT3A, TAF4, BMP2, EHMT1, MAP2K1, KLF12, SUB1, SMAD7, MAML1, MAML2, RYBP, SMAD3, SMAD2, SKI, UBP1, SREBF2, NOTCH1, HDAC3, SMARCC1, PRKAR1A, SMARCC2, JAZF1, DNMT1, …	4.44327e-07	up
GO:0006259	DNA metabolic process	84	XRCC5, XRCC2, XRCC6, CTCF, PRIM1, ANKRD17, CASP3, MCM7, NSMCE1, PRMT6, PSIP1, NSMCE2, POLG2, TOP2B, TOP2A, WDR33, RTEL1, CDC7, POLH, DTL, CHTF8, DDB1, TP53, PAPD7, RBBP7, MCM4, MCM6, RFC5, EYA3, RFC3, XPC, RFC1, RFC2, WRAP53, SMARCAL1, CDK2AP1, KPNA2, RAD17, TOP3B, MED1, HMGB1, WRNIP1, TIPIN, POLA1, PPT1, UBE2V2, TTC5, RPA1, ERCC5, ERCC6, SMARCB1, HINFP, GATAD2A, RNF168, ERCC3, APEX1, BAZ2A, FEN1…	4.57729e-07	up
GO:0030036	actin cytoskeleton organization	47	RHOJ, TRIOBP, MTSS1, PDLIM7, CNN3, PREX1, CALD1, WASF2, MYO9B, CYTH2, PRKG1, DAAM1, CALR, DSTN, TTLL3, PFN1, NISCH, GRID2IP, OBSL1, CAP1, FMNL3, ARHGEF2, ACTC1, TAOK2, ACTN4, NF2, NF1, FSCN1, ACTN1, ARHGEF17, EVL, TMSB10, FLNB, GAS7, VASP, ARHGEF11, EPB41L2, PPP1R9B, RND3, PPP1R9A, CFL1, SCIN, SDCBP, CRK, DBN1, CDC42BPB, MYH10	4.96476e-07	up
GO:0046907	intracellular transport	101	XPO1, SEC31A, AP1G1, RBM15B, USE1, TGFB3, MIPEP, SSR1, APP, TLK1, GLE1, PABPN1, SCAMP2, ERP29, SIX2, VPS41, AP4M1, ERGIC1, SEC61B, AAAS, ARRB1, SDCBP, VPS26B, PACS1, ARFGAP3, AKAP12, DSCR3, MYO9B, CTSA, CALR, MACF1, STX16, SEC61A1, RAB8A, TAOK2, MAP2K1, SMG6, HTT, SMG5, SMG7, MALT1, ICMT, NXF1, PPIH, KIAA1279, PCNA, XPO7, RERE, MYH10, ARSB, COPA, WASF2, CLTC, AKT1, NDE1, AP2B1, COPB1, ANP32A, MKK…	1.17867e-06	up
GO:0016569	covalent chromatin modification	31	MEAF6, ING3, TRRAP, BRPF1, PRMT6, LEO1, KDM3A, RNF168, BAZ2A, DNMT3A, CSRP2BP, EHMT1, TADA2A, SIRT1, CTR9, EYA3, PHF17, HDAC3, EP300, BAZ1B, WHSC1L1, PRDM5, PAF1, USP22, RBM14, APBB1, NSD1, RNF20, RNF40, SMARCA4, SUV420H1	1.72976e-06	up
GO:0000398	nuclear mRNA splicing, via spliceosome	35	FUS, U2AF2, TRA2B, TRA2A, RBM5, SF3B4, SF3B2, POLR2A, HNRNPA3, HNRNPM, SF3B1, PCBP2, HNRNPD, LSM2, RBM25, PABPN1, SRPK2, DHX9, PTBP1, HNRNPA2B1, SF1, YTHDC1, PRPF3, HNRNPR, RBMX, HNRNPU, PRPF6, PCF11, HNRNPH3, HNRNPUL1, CPSF7, SNRNP40, HNRNPH1, SMC1A, CSTF1	1.96403e-06	up
GO:0000375	RNA splicing, via transesterification reactions	35	FUS, U2AF2, TRA2B, TRA2A, RBM5, SF3B4, SF3B2, POLR2A, HNRNPA3, HNRNPM, SF3B1, PCBP2, HNRNPD, LSM2, RBM25, PABPN1, SRPK2, DHX9, PTBP1, HNRNPA2B1, SF1, YTHDC1, PRPF3, HNRNPR, RBMX, HNRNPU, PRPF6, PCF11, HNRNPH3, HNRNPUL1, CPSF7, SNRNP40, HNRNPH1, SMC1A, CSTF1	1.96403e-06	up
GO:0000377	RNA splicing, via transesterification reactions with bulged adenosine as nucleophile	35	FUS, U2AF2, TRA2B, TRA2A, RBM5, SF3B4, SF3B2, POLR2A, HNRNPA3, HNRNPM, SF3B1, PCBP2, HNRNPD, LSM2, RBM25, PABPN1, SRPK2, DHX9, PTBP1, HNRNPA2B1, SF1, YTHDC1, PRPF3, HNRNPR, RBMX, HNRNPU, PRPF6, PCF11, HNRNPH3, HNRNPUL1, CPSF7, SNRNP40, HNRNPH1, SMC1A, CSTF1	1.96403e-06	up
GO:0001568	blood vessel development	48	NRP2, DICER1, WASF2, PRRX1, CSPG4, JAG1, GJA5, MMP2, GJC1, CTNNB1, EDNRA, AKT1, PTK2, CUL7, PKD1, PLCD1, LOX, NR2F2, RASA1, RECK, COL18A1, KLF5, PLAT, SPHK2, TBX3, VHL, SMAD7, NF1, ARHGAP24, NCL, UBP1, SLIT2, THY1, ANXA2, SMO, LAMA4, NOTCH1, HDAC3, BGN, NUS1, MEOX2, ID1, LAMA5, ZMIZ1, VEGFA, NTRK2, POFUT1, SMARCA4	2.18247e-06	up
GO:0048598	embryonic morphogenesis	56	NDST1, DICER1, TGFB3, PRRX1, ZEB2, ZEB1, GLI2, GJA5, CTNNB1, RAB23, MKKS, PRKACA, RARB, LDB1, TP53, SIX2, SLIT2, VASP, ACVR2B, GNAQ, CFL1, EXT1, TBX18, NSD1, EXT2, SMARCA4, MED1, WNT5A, TSHZ1, ARFRP1, PTK7, COL2A1, ZBTB17, PFN1, MACF1, HOXA6, ALDH1A3, FBN2, TBX3, NF2, HTT, FTO, SMAD3, SKI, SMAD2, NOTCH2, NOTCH1, LAMA5, GFPT1, SP3, CDON, PRKAR1A, LRP6, PBX1, IFT52, LRP5	2.85323e-06	up
GO:0030029	actin filament-based process	47	RHOJ, TRIOBP, MTSS1, PDLIM7, CNN3, PREX1, CALD1, WASF2, MYO9B, CYTH2, PRKG1, DAAM1, CALR, DSTN, TTLL3, PFN1, NISCH, GRID2IP, OBSL1, CAP1, FMNL3, ARHGEF2, ACTC1, TAOK2, ACTN4, NF2, NF1, FSCN1, ACTN1, ARHGEF17, EVL, TMSB10, FLNB, GAS7, VASP, ARHGEF11, EPB41L2, PPP1R9B, RND3, PPP1R9A, CFL1, SCIN, SDCBP, CRK, DBN1, CDC42BPB, MYH10	3.21989e-06	up
GO:0045935	positive regulation of nucleobase, nucleoside, nucleotide and nucleic acid metabolic process	95	MEF2C, RSF1, XRCC6, TGFB3, CTCF, ZEB1, GLI2, CTNNB1, APP, BRPF1, SMARCD1, SHC1, RARB, YAP1, NR2F2, KDM5A, EGR1, TBL1XR1, FOXJ2, MTA2, TP53, SIX2, ARID1A, AHR, PRPF6, ARHGEF11, EYA3, NCOA1, EP300, ZMIZ1, VEGFA, MGEA5, PDGFRA, CAND1, PIAS2, PIAS1, USP22, NSD1, RNF20, MED1, SMARCA4, CAMTA2, ING2, ABLIM3, AFAP1L2, CALR, ARNT, STAT6, RGMB, CHD8, ERCC6, SMARCB1, HINFP, NFAT5, RNF168, KDM3A, AGRN, ERCC3…	3.85212e-06	up
GO:0008104	protein localization	125	XPO1, SEC31A, AP1G1, XPO4, USE1, TGFB3, VPS52, MIPEP, VPS33A, SSR1, CTNNB1, VPS13D, AAGAB, RAB23, TLK1, GLE1, SCAMP4, SCAMP2, ACTN4, ERP29, SIX2, TMSB10, VPS41, AP4M1, SEC61B, SDCBP, VPS26B, PACS1, FRAS1, PALM, ARFGAP3, AKAP12, RAB40C, AKAP10, CTSA, PPT1, SNX4, ARF5, CALR, MACF1, STX16, SEC61A1, RAB8A, RAB8B, TAOK2, HTT, ICMT, NDC80, REEP1, PPIH, ARF4, PCNA, XPO7, RERE, COPA, VPS37B, NUP188, CLTC…	4.10677e-06	up
GO:0001944	vasculature development	48	NRP2, DICER1, WASF2, PRRX1, CSPG4, JAG1, GJA5, MMP2, GJC1, CTNNB1, EDNRA, AKT1, PTK2, CUL7, PKD1, PLCD1, LOX, NR2F2, RASA1, RECK, COL18A1, KLF5, PLAT, SPHK2, TBX3, VHL, SMAD7, NF1, ARHGAP24, NCL, UBP1, SLIT2, THY1, ANXA2, SMO, LAMA4, NOTCH1, HDAC3, BGN, NUS1, MEOX2, ID1, LAMA5, ZMIZ1, VEGFA, NTRK2, POFUT1, SMARCA4	4.36013e-06	up
GO:0045184	establishment of protein localization	111	XPO1, SEC31A, AP1G1, XPO4, USE1, TGFB3, VPS52, MIPEP, VPS33A, SSR1, AAGAB, RAB23, TLK1, GLE1, SCAMP4, SCAMP2, ACTN4, ERP29, SIX2, VPS41, AP4M1, SEC61B, SDCBP, VPS26B, PACS1, FRAS1, ARFGAP3, AKAP12, RAB40C, CTSA, PPT1, SNX4, ARF5, CALR, MACF1, STX16, SEC61A1, RAB8A, RAB8B, TAOK2, HTT, ICMT, PPIH, ARF4, PCNA, XPO7, RERE, COPA, VPS37B, NUP188, CLTC, CANX, AKT1, AP2B1, COPB1, NECAP2, NECAP1, KDELR1, …	6.77302e-06	up
GO:0033554	cellular response to stress	87	XRCC5, PXDN, XRCC2, XRCC6, PRDX2, ANKRD17, CASP3, MCM7, CASP9, PCBP4, XYLT1, NSMCE1, INSIG1, PRMT6, NSMCE2, TLK1, POLG2, FAM129A, GNL1, TOP2A, WDR33, RTEL1, DBNL, POLH, DTL, DDB1, TP53, PAPD7, RFC5, EYA3, MAP4K3, SMO, PYCR1, CCND1, RFC3, XPC, BAZ1B, RFC1, RFC2, VCAN, EIF2AK3, EIF2AK4, RAD17, MAP3K11, WNT5A, HMGB1, PTPLAD1, WRNIP1, POLA1, TIPIN, UBE2V2, TTC5, ARNT, RPA1, SLC11A2, ERCC5, ERCC6, HIN…	7.09432e-06	up
GO:0006468	protein amino acid phosphorylation	99	PRPF4B, STK35, TGFB3, LPAR1, PRKG1, DMPK, CSNK2A2, APP, PIK3C3, TLK1, PRKACA, IKBKAP, DBNL, STK24, CSNK1G2, WNK1, STK4, WEE1, MARK2, MAP4K3, MAP4K4, EIF2AK1, BAZ1B, PDGFRA, NEK8, EIF2AK3, EIF2AK4, NEK6, FGFR1, FGFR4, PTPLAD1, STK10, ERBB2, PTK7, EPHB4, EPHB2, PTK2, TTBK2, BMP2, NIN, MAP2K1, TAOK2, RYK, SMAD7, TAOK3, TRIO, SMAD2, ATM, NTRK2, GRK5, CDC42BPB, CDK19, CDK17, FASTK, CAD, PRDX2, FER, FE…	7.19899e-06	up
GO:0015031	protein transport	110	XPO1, SEC31A, AP1G1, XPO4, USE1, TGFB3, VPS52, MIPEP, VPS33A, SSR1, AAGAB, RAB23, TLK1, GLE1, SCAMP4, SCAMP2, ACTN4, ERP29, SIX2, VPS41, AP4M1, SEC61B, SDCBP, VPS26B, PACS1, FRAS1, ARFGAP3, AKAP12, RAB40C, CTSA, PPT1, SNX4, ARF5, CALR, MACF1, STX16, SEC61A1, RAB8A, RAB8B, TAOK2, HTT, ICMT, PPIH, ARF4, PCNA, XPO7, RERE, COPA, VPS37B, NUP188, CLTC, CANX, AKT1, AP2B1, COPB1, NECAP2, NECAP1, KDELR1, …	7.51188e-06	up
GO:0016570	histone modification	29	MEAF6, ING3, TRRAP, BRPF1, PRMT6, LEO1, KDM3A, RNF168, BAZ2A, CSRP2BP, EHMT1, TADA2A, SIRT1, CTR9, EYA3, PHF17, HDAC3, EP300, BAZ1B, WHSC1L1, PRDM5, PAF1, USP22, RBM14, APBB1, NSD1, RNF20, RNF40, SUV420H1	8.07479e-06	up
GO:0051173	positive regulation of nitrogen compound metabolic process	96	MEF2C, RSF1, XRCC6, TGFB3, CTCF, ZEB1, GLI2, CTNNB1, AKT1, APP, BRPF1, SMARCD1, SHC1, RARB, YAP1, NR2F2, KDM5A, EGR1, TBL1XR1, FOXJ2, MTA2, TP53, SIX2, ARID1A, AHR, PRPF6, ARHGEF11, EYA3, NCOA1, EP300, ZMIZ1, VEGFA, MGEA5, PDGFRA, CAND1, PIAS2, PIAS1, USP22, NSD1, RNF20, MED1, SMARCA4, CAMTA2, ING2, ABLIM3, AFAP1L2, CALR, ARNT, STAT6, RGMB, CHD8, ERCC6, SMARCB1, HINFP, NFAT5, RNF168, KDM3A, AGRN,…	8.29453e-06	up
GO:0035295	tube development	43	WNT5A, FGFR4, DICER1, PTK7, TGFB3, ZEB2, GLI2, GJA5, ASAH1, SCRIB, LGR4, CTNNB1, EDNRA, PFN1, SPRY1, GPC3, MKKS, LOX, RARB, PCSK5, TRAF4, BMP2, MAN1A2, TBX3, SMAD2, SLIT2, VASP, GZF1, TNS3, MAN2A1, ACVR2B, NOTCH1, EP300, LAMA5, SP3, VEGFA, CFL1, PDGFRA, MAPK8IP3, PBX1, IFT52, NFIB, MED1	8.47328e-06	up
GO:0006886	intracellular protein transport	63	XPO1, COPA, AP1G1, TGFB3, MIPEP, CLTC, SSR1, AKT1, AP2B1, COPB1, TLK1, KDELR1, AP3B1, STX6, SEC23A, KDELR2, STX5, ARHGEF2, ERP29, TP53, SIX2, VPS41, AP4M1, IPO8, HERC2, SEC61B, MGEA5, SDCBP, KPNA2, PACS1, BID, YWHAZ, AP1M1, ARFGAP3, SNX15, SNX17, AKAP12, CTSA, CALR, SEC63, MACF1, STX16, EXOC4, PEX14, APPBP2, TNPO2, TNPO1, SEC61A1, TAOK2, HTT, IPO11, YWHAB, ICMT, COG3, PPIH, ERBB2IP, COG7, GSK3B, …	9.40053e-06	up
GO:0070727	cellular macromolecule localization	68	COPA, XPO1, AP1G1, TGFB3, MIPEP, CLTC, SSR1, CTNNB1, AKT1, AP2B1, COPB1, TLK1, KDELR1, AP3B1, STX6, SEC23A, KDELR2, STX5, ARHGEF2, ERP29, TP53, SIX2, VPS41, AP4M1, IPO8, HERC2, SEC61B, MGEA5, SDCBP, KPNA2, PACS1, BID, ARFGAP3, YWHAZ, AP1M1, SNX15, SNX17, AKAP12, CTSA, CALR, SEC63, MACF1, STX16, EXOC4, PEX14, APPBP2, TNPO2, TNPO1, SEC61A1, TERF2, TAOK2, HTT, IPO11, YWHAB, ICMT, REEP1, CASC3, COG3,…	9.40984e-06	up
GO:0016192	vesicle-mediated transport	87	COPA, SEC31A, PDLIM7, LDLR, AP1G1, WASF2, USE1, EPS15L1, TXLNA, ITSN2, CLTC, VPS33A, CTNNB1, AP2B1, APP, COPB1, NECAP2, ZFPL1, NECAP1, CAP1, KDELR1, AP3B1, STX6, SEC23A, KDELR3, KDELR2, STX5, DBNL, SCAMP2, NCALD, KIF17, VPS41, AP4M1, LDLRAP1, ERGIC1, GAPVD1, STXBP6, FNBP1L, ARRB1, IGF2R, SCIN, RIN2, COPE, SH3GL1, PACS1, ARFGAP3, YWHAZ, AP1M1, GNAI3, SNX17, PPT1, CYTH2, SNX4, ARF5, DTNBP1, APLP1, …	1.40331e-05	up
GO:0034613	cellular protein localization	67	COPA, XPO1, AP1G1, TGFB3, MIPEP, CLTC, SSR1, CTNNB1, AKT1, AP2B1, COPB1, TLK1, KDELR1, AP3B1, STX6, SEC23A, KDELR2, STX5, ARHGEF2, ERP29, TP53, SIX2, VPS41, AP4M1, IPO8, HERC2, SEC61B, MGEA5, SDCBP, KPNA2, PACS1, BID, ARFGAP3, YWHAZ, AP1M1, SNX15, SNX17, AKAP12, CTSA, CALR, SEC63, MACF1, STX16, EXOC4, PEX14, APPBP2, TNPO2, TNPO1, SEC61A1, TERF2, TAOK2, HTT, IPO11, YWHAB, ICMT, REEP1, COG3, PPIH, …	1.40578e-05	up
GO:0006974	response to DNA damage stimulus	62	XRCC5, XRCC2, XRCC6, ANKRD17, CASP3, MCM7, CASP9, PCBP4, NSMCE1, PRMT6, NSMCE2, TLK1, POLG2, GNL1, TOP2A, WDR33, RTEL1, POLH, DTL, DDB1, TP53, PAPD7, EYA3, RFC5, CCND1, RFC3, XPC, BAZ1B, RFC1, RFC2, RAD17, HMGB1, WRNIP1, TIPIN, POLA1, UBE2V2, TTC5, RPA1, ERCC5, ERCC6, HINFP, RNF168, ERCC3, APEX1, FEN1, TERF2, TRIP13, UPF1, TP53BP1, SIRT1, ATM, ATRX, SFPQ, POLD2, TDG, PCNA, SUPT16H, DGKZ, CUL4B, R…	1.69438e-05	up
GO:0006260	DNA replication	38	HMGB1, WRNIP1, POLA1, TIPIN, PRIM1, RPA1, MCM7, POLG2, TOP2A, TERF2, FEN1, CDC7, UPF1, POLH, DTL, NASP, CHTF8, GINS4, PAPD7, RBBP7, SIRT1, MCM4, MCM6, RFC5, TNKS1BP1, RFC3, RFC1, RFC2, POLD2, CDK2AP1, SUPT16H, PCNA, RBM14, NFIA, RAD17, NFIB, TOP3B, MED1	1.81368e-05	up
GO:0007369	gastrulation	20	NF2, HTT, LDB1, ARFRP1, TP53, SMAD3, SMAD2, ZBTB17, SLIT2, CTNNB1, ACVR2B, MACF1, PRKAR1A, LRP6, MKKS, PRKACA, EXT1, NSD1, EXT2, LRP5	1.89214e-05	up
GO:0045941	positive regulation of transcription	85	MEF2C, RSF1, XRCC6, TGFB3, CTCF, ZEB1, GLI2, CTNNB1, APP, BRPF1, SMARCD1, RARB, YAP1, NR2F2, KDM5A, EGR1, TBL1XR1, FOXJ2, MTA2, TP53, SIX2, ARID1A, AHR, PRPF6, ARHGEF11, NCOA1, EP300, ZMIZ1, VEGFA, CAND1, PIAS2, USP22, PIAS1, NSD1, RNF20, MED1, SMARCA4, CAMTA2, ING2, ABLIM3, AFAP1L2, ARNT, STAT6, RGMB, CHD8, SMARCB1, HINFP, NFAT5, KDM3A, AGRN, ERCC3, NFATC2, TCF4, ZNF423, KLF5, BMP2, SMAD9, TBX3,…	1.94127e-05	up
GO:0048729	tissue morphogenesis	36	FRAS1, FST, PTK7, ZEB2, JAG1, GLI2, SCRIB, CTNNB1, PFN1, GPC3, MACF1, ALDH1A3, MKKS, PRKACA, BMP2, ACTC1, TBX3, NF2, HTT, SMAD7, SMAD3, SMAD2, SLIT2, VASP, GZF1, NOTCH2, NOTCH1, LAMA5, FREM2, CFL1, PRKAR1A, PBX1, IFT52, TBX18, EXT2, SMARCA4	3.12643e-05	up
GO:0010628	positive regulation of gene expression	86	MEF2C, RSF1, XRCC6, TGFB3, CTCF, ZEB1, GLI2, CTNNB1, APP, BRPF1, SMARCD1, RARB, YAP1, NR2F2, KDM5A, EGR1, TBL1XR1, FOXJ2, MTA2, TP53, SIX2, ARID1A, AHR, PRPF6, ARHGEF11, NCOA1, EP300, ZMIZ1, VEGFA, CAND1, PIAS2, PIAS1, USP22, NSD1, RNF20, MED1, SMARCA4, CAMTA2, ING2, ABLIM3, AFAP1L2, ARNT, STAT6, RGMB, CHD8, SMARCB1, HINFP, NFAT5, KDM3A, AGRN, ERCC3, NFATC2, TCF4, ZNF423, KLF5, BMP2, SMAD9, TBX3,…	3.36385e-05	up
GO:0007049	cell cycle	108	XRCC2, WTAP, CTNNB1, APP, TARDBP, TLK1, ANAPC5, CHTF8, HMG20B, WEE1, TACC1, AHR, NCAPD2, MAD2L1, EP300, RCC2, PRDM5, RAD17, NEK6, EID1, TIPIN, RCC1, CALR, CCNG2, SESN3, URGCP, NIPBL, MACF1, SMARCB1, CLASP1, TFDP1, CKAP2, MAP2K1, TP53BP2, SMAD3, CDC20, NDC80, GAS7, ATM, NOTCH2, HDAC3, RGS2, ZNF318, SMC1A, NCOR1, MYH10, SPIN1, LZTS2, SENP5, LATS1, LATS2, AKT1, NDE1, MCM7, CEP250, PCBP4, PSMD5, DHCR…	4.41675e-05	up
GO:0007242	intracellular signaling cascade	161	TGFB3, ITPKB, LPAR1, PRKCSH, RGL1, CTNNB1, RGL2, S1PR3, TIAM2, PIK3C3, SPRED2, RAB23, TLK1, GNG2, PRKACA, SPRED1, DDAH2, RAPGEF1, PAG1, DBNL, IKBKAP, MAGI3, SOCS6, WNK1, SOCS7, SOCS4, ARID1A, SOCS5, STK4, MARK2, MAP4K3, MAP4K4, RND3, TNS3, SDCBP, PIAS2, PIAS1, EIF2AK3, RAD17, WNT5A, FGFR1, PTPLAD1, ERBB2, ARFRP1, TIPIN, RAB40C, AKAP13, MYO9B, ARF5, CALR, MYO9A, DOCK1, RHOBTB2, ARHGDIA, RAB8A, RAB…	4.74105e-05	up
GO:0006281	DNA repair	49	XRCC5, HMGB1, XRCC2, WRNIP1, XRCC6, POLA1, UBE2V2, TTC5, RPA1, ANKRD17, ERCC5, ERCC6, NSMCE1, PRMT6, HINFP, NSMCE2, RNF168, POLG2, ERCC3, APEX1, TOP2A, WDR33, RTEL1, FEN1, TRIP13, UPF1, POLH, DDB1, TP53BP1, TP53, PAPD7, SIRT1, ATM, ATRX, EYA3, RFC5, RFC3, XPC, RFC1, RFC2, SFPQ, POLD2, TDG, SUPT16H, PCNA, CUL4B, RBM14, SMC1A, RAD17	5.67339e-05	up
GO:0010557	positive regulation of macromolecule biosynthetic process	93	MEF2C, RSF1, XRCC6, TGFB3, CTCF, ZEB1, GLI2, CTNNB1, AKT1, APP, BRPF1, WIBG, SMARCD1, SHC1, RARB, YAP1, NR2F2, FAM129A, KDM5A, EGR1, TBL1XR1, FOXJ2, MTA2, TP53, SIX2, ARID1A, AHR, PRPF6, ARHGEF11, NCOA1, EP300, ZMIZ1, VEGFA, PDGFRA, CAND1, PIAS2, PIAS1, USP22, NSD1, RNF20, MED1, SMARCA4, CAMTA2, ING2, ABLIM3, AFAP1L2, CALR, ARNT, STAT6, RGMB, CHD8, SMARCB1, HINFP, NFAT5, KDM3A, AGRN, ERCC3, NFATC…	7.34968e-05	up
GO:0010604	positive regulation of macromolecule metabolic process	116	MEF2C, XRCC6, TGFB3, CTNNB1, APP, BRPF1, WIBG, SMARCD1, RARB, ANAPC5, MTA2, SIX2, ARID1A, AHR, EP300, VEGFA, PDGFRA, PIAS2, PIAS1, RNF20, SMARCA4, CAMTA2, AFAP1L2, CALR, SCRIB, ARNT, SMARCB1, RNF168, AGRN, TCF4, ZNF423, KLF5, BMP2, SMAD9, MAP2K1, KLF12, SMAD7, TAF8, MAML1, TP53BP1, MAML2, CD276, SMAD3, CDC20, SMAD2, DDX5, SREBF2, NOTCH1, EBF3, SMARCC1, EBF2, EBF1, SMARCC2, DNMT1, RSF1, GJA1, CTCF…	7.37879e-05	up
GO:0040029	regulation of gene expression, epigenetic	20	DNMT3A, DICER1, TRIM27, SMAD3, CTCF, ARID1A, SMAD2, IGF2, SIRT1, ATRX, TARBP2, SRRT, DGCR8, SND1, SMARCD1, GATAD2A, DNMT1, TNRC6A, BAZ2A, SMARCA4	7.94651e-05	up
GO:0048736	appendage development	24	WNT5A, TBX3, DICER1, FTO, PRRX1, SKI, COL2A1, GJA5, CTNNB1, NOTCH2, NOTCH1, GNAQ, MEOX2, RAB23, LRP6, PBX1, RARB, FBN2, IFT52, NR2F2, PCSK5, SMARCA4, LRP5, MED1	7.97558e-05	up
GO:0060173	limb development	24	WNT5A, TBX3, DICER1, FTO, PRRX1, SKI, COL2A1, GJA5, CTNNB1, NOTCH2, NOTCH1, GNAQ, MEOX2, RAB23, LRP6, PBX1, RARB, FBN2, IFT52, NR2F2, PCSK5, SMARCA4, LRP5, MED1	7.97558e-05	up
GO:0048514	blood vessel morphogenesis	39	NRP2, DICER1, WASF2, PRRX1, CSPG4, JAG1, CTNNB1, GJC1, EDNRA, PTK2, CUL7, PLCD1, NR2F2, RASA1, KLF5, PLAT, COL18A1, VHL, SMAD7, NF1, ARHGAP24, UBP1, NCL, SLIT2, ANXA2, THY1, SMO, HDAC3, NOTCH1, BGN, MEOX2, NUS1, ID1, LAMA5, ZMIZ1, VEGFA, NTRK2, POFUT1, SMARCA4	8.41627e-05	up
GO:0060284	regulation of cell development	38	XRCC5, XRCC2, XRCC6, TGFB3, REST, CALR, GLI2, TTL, TTC3, EPHB2, PTK2, ATN1, AGRN, BOC, ARHGDIA, SPP1, BMP2, ARHGEF1, TBX3, SMAD7, PLXNB2, NF1, MAP1B, TP53, SMAD3, IGF2, SMAD2, SLIT2, THY1, NOTCH3, SMO, NOTCH1, HDAC3, CCND2, NTRK2, PBX1, TGIF2, DBN1	9.90215e-05	up
GO:0043009	chordate embryonic development	54	XRCC2, NDST1, TGFB3, PRRX1, ZEB2, ZEB1, GLI2, EDNRA, GABPA, TP53, SIX2, VASP, RIC8A, MAN2A1, SMO, EP300, ZMIZ1, CFL1, PDGFRA, KIAA1217, TBX18, SMARCA4, MED1, FKBP8, SYVN1, FUT8, PTK7, COL2A1, ARNT, RPA1, PFN1, CHD8, HOXA6, HINFP, PKD2, PKD1, PCSK5, TERF2, TBX3, HTT, NASP, TAF8, SMAD2, ICMT, ATM, PLCG1, MEOX2, GFPT1, SP3, MAPK8IP3, PBX1, IFT52, POFUT1, MYH10	0.000104477	up
GO:0051252	regulation of RNA metabolic process	218	MEF2C, HMGN2, FST, XRCC6, SYNCRIP, ZNF250, REST, MED22, MED20, CTNNB1, APP, SIN3B, ZFP90, RARB, IKBKAP, HMG20A, HMG20B, ZNF500, ZNF783, VEGFA, SMARCAL1, MED18, MNT, TGIF2, PIAS2, PIAS1, ZNF79, ZNF133, ZNF131, AFAP1L2, CALR, PFN1, TCF20, ATN1, HTATSF1, AGRN, TCF4, KLF5, ZNF398, DNMT3A, DHX9, BMP2, SMAD9, KLF12, MAP2K1, SUB1, SMAD7, TP53BP1, MAML1, MAML2, RYBP, SMAD3, SMAD2, SKI, UBP1, NOTCH2, NOTC…	0.000106921	up
GO:0007507	heart development	39	SRI, NRP2, ERBB2, GJA1, COL2A1, GLI2, GJA5, GJC1, CTNNB1, EDNRA, CASP3, PKD2, MKKS, OBSL1, PKD1, RARB, PCSK5, ACTC1, BMP2, TBX3, SMAD7, NF1, SMAD2, ATM, SMO, ACVR2B, NOTCH1, EP300, GNAQ, ID1, ZMIZ1, MOSPD3, ADAMTS1, IFT52, ADAM19, POFUT1, MED1, SMARCA4, MYH10	0.000126675	up
GO:0030201	heparan sulfate proteoglycan metabolic process	8	CSGALNACT1, NDST1, SULF2, NDST2, SULF1, EXT1, EXT2, HS2ST1	0.00012992	up
GO:0009792	embryonic development ending in birth or egg hatching	54	XRCC2, NDST1, TGFB3, PRRX1, ZEB2, ZEB1, GLI2, EDNRA, GABPA, TP53, SIX2, VASP, RIC8A, MAN2A1, SMO, EP300, ZMIZ1, CFL1, PDGFRA, KIAA1217, TBX18, SMARCA4, MED1, FKBP8, SYVN1, FUT8, PTK7, COL2A1, ARNT, RPA1, PFN1, CHD8, HOXA6, HINFP, PKD2, PKD1, PCSK5, TERF2, TBX3, HTT, NASP, TAF8, SMAD2, ICMT, ATM, PLCG1, MEOX2, GFPT1, SP3, MAPK8IP3, PBX1, IFT52, POFUT1, MYH10	0.000133203	up
GO:0006913	nucleocytoplasmic transport	31	XPO1, NUP160, RBM15B, TGFB3, CALR, AKT1, ANP32A, GLE1, TNPO2, TNPO1, PABPN1, UPF1, SMG6, HTT, SMG5, IPO11, SMG7, TP53, SIX2, MALT1, IPO8, NXF1, PPIH, AAAS, SEC61B, GSK3B, THOC5, THOC2, XPO7, KPNA2, RERE	0.00013789	up
GO:0009100	glycoprotein metabolic process	37	GALNT2, OSTC, GALNT1, APH1A, LDLR, NDST1, FUT8, NDST2, MAN1B1, COL2A1, HS2ST1, ST3GAL1, GALNT10, MPDU1, B3GNT1, CHST14, RPN2, OGT, DHCR24, MGAT4B, MAN1A2, MOGS, MAN1C1, CSGALNACT1, COG3, MAN2A1, ADAMTS9, BGN, COG7, SULF2, ST8SIA4, BACE1, SULF1, MGEA5, EXT1, POFUT1, EXT2	0.000158998	up
GO:0045786	negative regulation of cell cycle	20	BMP2, TAF6, TP53BP2, GMNN, TP53, SMAD3, CDK6, ZBTB17, LATS1, PDCD4, LATS2, SCRIB, ATM, HDAC3, CASP3, MAD2L1, PRDM4, DGKZ, APBB1, SMARCA4	0.000164137	up
GO:0051169	nuclear transport	31	XPO1, NUP160, RBM15B, TGFB3, CALR, AKT1, ANP32A, GLE1, TNPO2, TNPO1, PABPN1, UPF1, SMG6, HTT, SMG5, IPO11, SMG7, TP53, SIX2, MALT1, IPO8, NXF1, PPIH, AAAS, SEC61B, GSK3B, THOC5, THOC2, XPO7, KPNA2, RERE	0.000174623	up
GO:0030323	respiratory tube development	23	WNT5A, FGFR4, MAN1A2, DICER1, TGFB3, SMAD2, GLI2, ASAH1, CTNNB1, MAN2A1, TNS3, ACVR2B, NOTCH1, EP300, LAMA5, SP3, VEGFA, PDGFRA, MAPK8IP3, LOX, PCSK5, TRAF4, NFIB	0.000193293	up
GO:0051726	regulation of cell cycle	53	XPO1, CTCF, LATS1, PDCD4, LATS2, AKT1, CSNK2A2, APP, CASP3, CUL7, PCBP4, CDK13, CDC7, DDB1, TP53, CDK6, HERC2, UBE2C, CCND1, MAD2L1, XPC, PRDM4, CCND2, MNT, USP22, CHFR, NEK6, RAD17, SMARCA4, TIPIN, AFAP1L2, TRRAP, RCC1, CALR, ZBTB17, CCNG2, SCRIB, MYCBP2, HINFP, ERCC3, BMP2, TBX3, TAF6, TP53BP2, GMNN, SMAD3, IGF2, ATM, PPP1R9B, HDAC3, DGKZ, SMC1A, APBB1	0.000197112	up
GO:0051056	regulation of small GTPase mediated signal transduction	43	ARFGAP3, RABGAP1, PREX1, ERBB2, RABGAP1L, AKAP13, CYTH2, ITPKB, LPAR1, ITSN2, SCRIB, RGL1, RGL2, TBC1D16, PLEKHG3, TIAM2, GIT2, RASA3, RAPGEF1, RASA1, IQSEC1, GIT1, ARHGEF2, TBC1D2B, ARHGEF1, MAP2K1, TBC1D10B, NF1, PSD3, ARHGEF17, TRIO, ICMT, VAV2, TBC1D22B, DNMBP, ARHGEF11, NOTCH2, GAPVD1, ACAP3, SYDE1, ACAP2, DGKZ, CRK	0.000220616	up
GO:0022604	regulation of cell morphogenesis	27	RHOJ, PALM, TGFB3, TTC3, TTL, EPHB2, PTK2, ARHGDIA, RASA1, FN1, SPP1, ARHGEF1, TAOK2, SMAD7, PLXNB2, MAP1B, SMAD3, FBLIM1, SMAD2, GAS7, SLIT2, THY1, FYN, VEGFA, CYFIP1, AKAP2, MYH10	0.000222637	up
GO:0030198	extracellular matrix organization	23	RECK, COL18A1, VHL, LUM, NF1, COL2A1, COL5A2, APLP2, EMILIN1, ANXA2, APLP1, CSGALNACT1, PTK2, APP, SMOC1, TGFBI, PDGFRA, COL12A1, LOX, VWA1, APBB1, GFOD2, SMARCA4	0.000259218	up
GO:0006355	regulation of transcription, DNA-dependent	211	MEF2C, HMGN2, FST, XRCC6, ZNF250, REST, MED22, MED20, CTNNB1, APP, SIN3B, ZFP90, RARB, IKBKAP, HMG20A, HMG20B, ZNF500, ZNF783, VEGFA, SMARCAL1, MED18, MNT, TGIF2, PIAS2, PIAS1, ZNF79, ZNF133, ZNF131, AFAP1L2, CALR, PFN1, TCF20, ATN1, HTATSF1, AGRN, TCF4, ZNF398, KLF5, DNMT3A, BMP2, SMAD9, KLF12, MAP2K1, SUB1, SMAD7, TP53BP1, MAML1, MAML2, RYBP, SMAD3, SMAD2, SKI, UBP1, NOTCH2, NOTCH1, TULP4, ZNF2…	0.000272058	up
GO:0035107	appendage morphogenesis	22	WNT5A, TBX3, DICER1, FTO, PRRX1, SKI, COL2A1, GJA5, CTNNB1, NOTCH2, NOTCH1, GNAQ, RAB23, LRP6, PBX1, RARB, FBN2, IFT52, PCSK5, SMARCA4, LRP5, MED1	0.000340846	up
GO:0035108	limb morphogenesis	22	WNT5A, TBX3, DICER1, FTO, PRRX1, SKI, COL2A1, GJA5, CTNNB1, NOTCH2, NOTCH1, GNAQ, RAB23, LRP6, PBX1, RARB, FBN2, IFT52, PCSK5, SMARCA4, LRP5, MED1	0.000340846	up
GO:0046578	regulation of Ras protein signal transduction	37	ARFGAP3, RABGAP1, PREX1, ERBB2, RABGAP1L, AKAP13, ITPKB, CYTH2, LPAR1, ITSN2, SCRIB, TBC1D16, PLEKHG3, TIAM2, GIT2, IQSEC1, GIT1, ARHGEF2, TBC1D2B, ARHGEF1, MAP2K1, TBC1D10B, NF1, PSD3, TRIO, ARHGEF17, ICMT, VAV2, TBC1D22B, DNMBP, ARHGEF11, NOTCH2, ACAP3, SYDE1, ACAP2, DGKZ, CRK	0.000348285	up
GO:0000122	negative regulation of transcription from RNA polymerase II promoter	44	MEF2C, HMGB1, EID1, JDP2, FST, ZEB1, CALR, GLI2, ZNF174, CTNNB1, SORBS3, ATN1, RARB, TCF4, NR2F2, ZNF496, EGR1, DNMT3A, TBL1XR1, EHMT1, KLF12, VHL, SMAD7, JARID2, MTA2, GABPA, RYBP, TRIM27, TP53, SMAD3, SKI, SNAI2, RBBP7, GZF1, HDAC3, ID1, JAZF1, DNMT1, LCOR, NSD1, NCOR1, RBM15, NCOR2, SMARCA4	0.000368548	up
GO:0000902	cell morphogenesis	55	NRP2, GJA1, PIP5K1C, GLI2, CTNNB1, TTLL3, NDE1, APP, MKKS, CAP1, TOP2B, PRKCA, ARHGEF2, PCM1, STK4, VASP, SLIT2, MARK2, ARHGEF11, SMO, SS18, CFL1, VCAN, ERBB2, PTK7, SCRIB, MYCBP2, EPHB2, ALCAM, PTK2, MACF1, B3GNT1, CLASP1, FN1, COL18A1, ACTB, RAB8A, BMP2, MAP2K1, RYK, VHL, CREB1, MAP1B, NDC80, GAS7, SEMA6A, NOTCH1, ERBB2IP, MAP1S, LAMA5, MAPK8IP3, CYFIP1, APBB1, CDC42BPB, MYH10	0.000369609	up
GO:0031328	positive regulation of cellular biosynthetic process	93	MEF2C, RSF1, XRCC6, TGFB3, CTCF, ZEB1, GLI2, CTNNB1, AKT1, APP, BRPF1, WIBG, SMARCD1, SHC1, RARB, YAP1, NR2F2, FAM129A, KDM5A, EGR1, TBL1XR1, FOXJ2, MTA2, TP53, SIX2, ARID1A, AHR, PRPF6, ARHGEF11, NCOA1, EP300, ZMIZ1, VEGFA, PDGFRA, CAND1, PIAS2, PIAS1, USP22, NSD1, RNF20, MED1, SMARCA4, CAMTA2, ING2, ABLIM3, AFAP1L2, CALR, ARNT, STAT6, RGMB, CHD8, SMARCB1, HINFP, NFAT5, KDM3A, AGRN, ERCC3, NFATC…	0.000380709	up
GO:0051052	regulation of DNA metabolic process	24	NF2, POLH, IL27RA, WRNIP1, GMNN, TP53, TIPIN, TGFB3, UBE2V2, IGF2, GLI2, CALR, STAT6, EYA3, PPP2CA, PDGFRA, PCNA, MGEA5, RNF168, SHC1, KPNA2, TERF2, RTEL1, RAD17	0.000392305	up
GO:0006469	negative regulation of protein kinase activity	20	PRKCA, NF2, HMGCR, NF1, IGF2, PDCD4, LATS1, LATS2, SPRY4, THY1, AKT1, TARBP2, CASP3, SPRY1, RGS4, PPP2CA, SPRED2, MLLT1, SPRED1, DUSP6	0.000436925	up
GO:0035113	embryonic appendage morphogenesis	20	WNT5A, TBX3, DICER1, FTO, PRRX1, SKI, GJA5, CTNNB1, NOTCH2, NOTCH1, GNAQ, LRP6, RAB23, PBX1, RARB, FBN2, IFT52, SMARCA4, LRP5, MED1	0.000436925	up
GO:0030326	embryonic limb morphogenesis	20	WNT5A, TBX3, DICER1, FTO, PRRX1, SKI, GJA5, CTNNB1, NOTCH2, NOTCH1, GNAQ, LRP6, RAB23, PBX1, RARB, FBN2, IFT52, SMARCA4, LRP5, MED1	0.000436925	up
GO:0002009	morphogenesis of an epithelium	22	FRAS1, BMP2, HTT, PTK7, ZEB2, JAG1, GLI2, SCRIB, VASP, CTNNB1, GZF1, PFN1, NOTCH2, GPC3, FREM2, LAMA5, ALDH1A3, CFL1, MKKS, PBX1, IFT52, TBX18	0.000453199	up
GO:0051254	positive regulation of RNA metabolic process	69	MEF2C, XRCC6, TGFB3, CTCF, ZEB1, GLI2, CTNNB1, APP, SMARCD1, YAP1, RARB, NR2F2, EGR1, TBL1XR1, FOXJ2, MTA2, TP53, SIX2, ARID1A, AHR, PRPF6, ARHGEF11, NCOA1, EP300, ZMIZ1, VEGFA, PIAS2, CAND1, PIAS1, NSD1, MED1, SMARCA4, CAMTA2, ABLIM3, AFAP1L2, ARNT, STAT6, CHD8, ERCC6, SMARCB1, NFAT5, AGRN, NFATC2, TCF4, ERCC3, BMP2, TBX3, MAP2K1, KLF12, TAF8, MAML1, CREB1, TP53BP1, MAML2, SMAD3, CREB5, ILF3, SM…	0.000543957	up
GO:0006338	chromatin remodeling	15	RSF1, NASP, CBX3, ARID1A, SIRT1, CHD8, BAZ1B, SMARCB1, SMARCC1, SMARCD1, SMARCC2, CHD6, BAZ2A, RERE, SMARCA4	0.000583876	up
GO:0045596	negative regulation of cell differentiation	37	HMGB3, DICER1, FST, PRDX2, REST, JAG1, ZEB1, CALR, GLI2, TTC3, EPHB2, CTNNB1, PTK2, ARHGDIA, SPP1, ARHGEF1, TBX3, SMAD7, LDB1, NF1, TP53, SMAD3, SIX2, CDK6, SKI, SOCS5, SIRT1, THY1, NOTCH3, NOTCH2, CCND1, NOTCH1, HDAC3, PBX1, THOC5, RBM15, HDAC7	0.000601985	up
GO:0043414	biopolymer methylation	17	DNMT3A, EHMT1, CTCF, ICMT, ATRX, METTL14, WHSC1L1, PRMT6, PRDM5, GATAD2A, DNMT1, PCMT1, NSD1, RNF20, BAZ2A, FTSJ3, SUV420H1	0.000603311	up
GO:0009891	positive regulation of biosynthetic process	93	MEF2C, RSF1, XRCC6, TGFB3, CTCF, ZEB1, GLI2, CTNNB1, AKT1, APP, BRPF1, WIBG, SMARCD1, SHC1, RARB, YAP1, NR2F2, FAM129A, KDM5A, EGR1, TBL1XR1, FOXJ2, MTA2, TP53, SIX2, ARID1A, AHR, PRPF6, ARHGEF11, NCOA1, EP300, ZMIZ1, VEGFA, PDGFRA, CAND1, PIAS2, PIAS1, USP22, NSD1, RNF20, MED1, SMARCA4, CAMTA2, ING2, ABLIM3, AFAP1L2, CALR, ARNT, STAT6, RGMB, CHD8, SMARCB1, HINFP, NFAT5, KDM3A, AGRN, ERCC3, NFATC…	0.000616975	up
GO:0033673	negative regulation of kinase activity	20	PRKCA, NF2, HMGCR, NF1, IGF2, PDCD4, LATS1, LATS2, SPRY4, THY1, AKT1, TARBP2, CASP3, SPRY1, RGS4, PPP2CA, SPRED2, MLLT1, SPRED1, DUSP6	0.000682523	up
GO:0007265	Ras protein signal transduction	22	RHOJ, DBNL, ARHGEF1, MAP2K1, PTPLAD1, NF1, WASF2, YWHAB, RTKN, MYO9B, TAX1BP3, RFXANK, RGL2, ARHGEF11, NISCH, GNB1, CFL1, SDCBP, SHC1, SHC2, ARHGDIA, DHCR24	0.000777538	up
GO:0016310	phosphorylation	104	PRPF4B, STK35, TGFB3, LPAR1, PRKG1, DMPK, CSNK2A2, APP, PIK3C3, TLK1, PRKACA, IKBKAP, DBNL, STK24, CSNK1G2, WNK1, STK4, WEE1, MARK2, MAP4K3, MAP4K4, EIF2AK1, BAZ1B, PDGFRA, NEK8, EIF2AK3, EIF2AK4, NEK6, FGFR1, FGFR4, PTPLAD1, STK10, ERBB2, PTK7, EPHB4, EPHB2, PTK2, TTBK2, BMP2, NIN, TAOK2, MAP2K1, RYK, SMAD7, TAOK3, TRIO, SMAD2, ATM, NTRK2, GRK5, CDC42BPB, CDK19, CDK17, FASTK, PRDX2, CAD, FER, FE…	0.000783876	up
GO:0006261	DNA-dependent DNA replication	15	HMGB1, TIPIN, POLA1, MCM4, MCM6, RPA1, PRIM1, RFC3, MCM7, RFC1, POLD2, CDK2AP1, POLG2, FEN1, TOP3B	0.000852185	up
GO:0030324	lung development	21	WNT5A, FGFR4, MAN1A2, DICER1, TGFB3, SMAD2, GLI2, ASAH1, CTNNB1, MAN2A1, TNS3, ACVR2B, NOTCH1, EP300, LAMA5, SP3, VEGFA, PDGFRA, MAPK8IP3, LOX, NFIB	0.000899777	up
GO:0001501	skeletal system development	49	NDST1, PDLIM7, LTBP3, TCOF1, PRRX1, TGFB3, ZEB1, GLI2, MMP2, GJA5, CTNNB1, COL12A1, PRKCA, SIX2, SMO, CTSK, ACVR2B, GNAQ, NAB2, PDGFRA, KIAA1217, EXT1, EIF2AK3, EXT2, WNT5A, FGFR1, ACP2, COL2A1, HOXA6, PKD1, PTN, PAPSS1, PCSK5, SPP1, BMP2, BMP1, EVC, TBX3, RYK, NF1, SMAD3, IGF2, COL5A2, ANXA2, GFPT1, SP3, PBX1, BMP5, CDH11	0.000908754	up
GO:0006605	protein targeting	36	PACS1, BID, XPO1, YWHAZ, TGFB3, AKAP12, MIPEP, CALR, SEC63, SSR1, AKT1, MACF1, EXOC4, PEX14, TNPO2, TNPO1, SEC61A1, AP3B1, TAOK2, HTT, IPO11, YWHAB, TP53, SIX2, ICMT, IPO8, PPIH, SEC61B, ERBB2IP, GSK3B, YWHAQ, MGEA5, SDCBP, XPO7, KPNA2, RERE	0.00109561	up
GO:0016044	membrane organization	56	COPA, SEC31A, PDLIM7, LDLR, AP1G1, WASF2, EPS15L1, ITSN2, CLTC, APP, COPB1, NECAP2, NECAP1, CAP1, DHCR24, AP3B1, SEC23A, STX6, DBNL, TP53, LDLRAP1, GAPVD1, ARRB1, FNBP1L, IGF2R, RIN2, COPE, SH3GL1, BID, AP1M1, GNAI3, SNX17, SNX4, CYTH2, PPT1, DTNBP1, APLP1, ELMOD3, DOCK1, FCER1G, AGRN, HIP1, RAB8A, HTT, RUFY1, REEP1, CORO1C, SH3BP4, PLSCR3, RAB34, RAB22A, LRP6, SH3D19, MYH10, CLCN5, LRP5	0.00109993	up
GO:0001889	liver development	14	JARID2, ERBB2, NF1, ICMT, CTNNB1, MAN2A1, NOTCH1, CCND1, HDAC3, EP300, CCND2, SP3, AACS, MED1	0.00110035	up
GO:0007264	small GTPase mediated signal transduction	47	RHOJ, PTPLAD1, WASF2, ARFRP1, RAB40C, RTKN, MYO9B, ARF5, RFXANK, RGL1, RGL2, NISCH, DOCK1, RHOBTB2, RAB23, SHC1, RHOC, RAPGEF1, SHC2, ARHGDIA, DHCR24, RAP2A, RAB2B, DBNL, RAB8A, ARHGEF1, RAP2C, RAB8B, MAP2K1, NF1, YWHAB, RGS19, VAV2, TAX1BP3, ARHGEF11, ARL3, RND3, GNB1, ARF4, RAB22A, RAB34, CFL1, YWHAQ, RIN2, SDCBP, RIT1, ARL4D	0.00110035	up
GO:0060541	respiratory system development	22	WNT5A, FGFR4, MAN1A2, DICER1, TGFB3, SMAD2, GLI2, ASAH1, CTNNB1, MAN2A1, TNS3, ACVR2B, NOTCH1, EP300, LAMA5, ALDH1A3, SP3, VEGFA, PDGFRA, MAPK8IP3, LOX, NFIB	0.00113731	up
GO:0045893	positive regulation of transcription, DNA-dependent	67	MEF2C, XRCC6, TGFB3, CTCF, ZEB1, GLI2, CTNNB1, APP, SMARCD1, YAP1, RARB, NR2F2, EGR1, TBL1XR1, FOXJ2, MTA2, TP53, SIX2, ARID1A, AHR, PRPF6, ARHGEF11, NCOA1, EP300, ZMIZ1, VEGFA, PIAS2, CAND1, PIAS1, NSD1, MED1, SMARCA4, CAMTA2, ABLIM3, AFAP1L2, ARNT, STAT6, CHD8, SMARCB1, NFAT5, AGRN, NFATC2, TCF4, ERCC3, BMP2, TBX3, KLF12, TAF8, MAML1, CREB1, TP53BP1, MAML2, SMAD3, CREB5, ILF3, SMAD2, SREBF2, NO…	0.00115542	up
GO:0051168	nuclear export	15	PABPN1, XPO1, UPF1, SMG6, NUP160, SMG5, SMG7, MALT1, NXF1, CALR, GSK3B, GLE1, THOC5, THOC2, XPO7	0.0012176	up
GO:0043062	extracellular structure organization	29	TNC, ERBB2, LUM, UTRN, COL2A1, APLP2, CTNNB1, APLP1, APP, PTK2, SMOC1, TGFBI, COL12A1, AGRN, LOX, VWA1, GFOD2, COL18A1, RECK, VHL, NF1, MAP1B, COL5A2, EMILIN1, ANXA2, CSGALNACT1, PDGFRA, APBB1, SMARCA4	0.00146087	up
GO:0043407	negative regulation of MAP kinase activity	11	PRKCA, SPRY1, HMGCR, PPP2CA, RGS4, NF1, SPRED2, SPRED1, PDCD4, SPRY4, DUSP6	0.00147582	up
GO:0051348	negative regulation of transferase activity	20	PRKCA, NF2, HMGCR, NF1, IGF2, PDCD4, LATS1, LATS2, SPRY4, THY1, AKT1, TARBP2, CASP3, SPRY1, RGS4, PPP2CA, SPRED2, MLLT1, SPRED1, DUSP6	0.00154302	up
GO:0006275	regulation of DNA replication	15	NF2, GMNN, WRNIP1, TP53, TGFB3, TIPIN, IGF2, GLI2, CALR, PPP2CA, PDGFRA, PCNA, SHC1, RAD17, TERF2	0.00170581	up
GO:0032989	cellular component morphogenesis	57	NRP2, GJA1, PIP5K1C, GLI2, CTNNB1, TTLL3, NDE1, APP, MKKS, CAP1, TOP2B, PRKCA, ARHGEF2, PCM1, STK4, VASP, SLIT2, MARK2, ARHGEF11, SMO, SS18, CFL1, VCAN, ERBB2, PTK7, SCRIB, MYCBP2, EPHB2, ALCAM, PTK2, MACF1, B3GNT1, OBSL1, CLASP1, FN1, COL18A1, ACTB, RAB8A, BMP2, ACTC1, MAP2K1, RYK, VHL, CREB1, MAP1B, NDC80, GAS7, SEMA6A, NOTCH1, ERBB2IP, MAP1S, LAMA5, MAPK8IP3, CYFIP1, APBB1, CDC42BPB, MYH10	0.00170849	up
GO:0051301	cell division	45	HAUS4, CDK19, HAUS6, LZTS2, HAUS5, CETN3, TIPIN, RCC1, SENP5, CCNG2, LATS1, LATS2, DSTN, NDE1, NCAPH, CLASP1, RASA1, CDK13, CDC7, ARHGEF2, PDS5B, ANAPC5, PAPD7, CDK6, CDC20, NDC80, UBE2C, WEE1, TACC1, NCAPD2, ARL3, ARHGEF11, CCND1, NOTCH1, MAD2L1, RCC2, CCND2, CFL1, CDCA7L, CDK11B, HAUS8, CHFR, SMC1A, NEK6, MYH10	0.00173673	up
GO:0050657	nucleic acid transport	20	PABPN1, XPO1, UPF1, NUP160, SMG6, SMG5, SMG7, HNRNPA2B1, NUP93, NUP188, CASC3, NXF1, ATXN2, POM121, KHSRP, MAGOHB, THOC5, GLE1, THOC2, XPO7	0.0017517	up
GO:0050658	RNA transport	20	PABPN1, XPO1, UPF1, NUP160, SMG6, SMG5, SMG7, HNRNPA2B1, NUP93, NUP188, CASC3, NXF1, ATXN2, POM121, KHSRP, MAGOHB, THOC5, GLE1, THOC2, XPO7	0.0017517	up
GO:0051236	establishment of RNA localization	20	PABPN1, XPO1, UPF1, NUP160, SMG6, SMG5, SMG7, HNRNPA2B1, NUP93, NUP188, CASC3, NXF1, ATXN2, POM121, KHSRP, MAGOHB, THOC5, GLE1, THOC2, XPO7	0.0017517	up
GO:0045597	positive regulation of cell differentiation	37	XRCC5, XRCC2, PDLIM7, XRCC6, TGFB3, ITPKB, JAG1, GLI2, EPHB2, CTNNB1, ARNT, AKT1, ACIN1, BOC, FNDC3B, ARHGDIA, AP3B1, SH3PXD2B, BMP2, SMAD9, ARHGEF1, MAP2K1, VHL, PLXNB2, MAP1B, CD276, SMAD3, IGF2, SMAD2, BAD, SOCS5, SLIT2, SMO, ACVR2B, NOTCH1, SCIN, TGIF2	0.00176613	up
GO:0022402	cell cycle process	76	LZTS2, XRCC2, LATS1, LATS2, CTNNB1, AKT1, NDE1, APP, CEP250, PCBP4, TARDBP, PSMD5, DHCR24, CDC7, KHDRBS1, ARHGEF2, ANAPC5, TP53, PAPD7, SF1, CDK6, UBE2C, WEE1, NCAPD2, CCND1, MAD2L1, RCC2, CCND2, CDK2AP1, PSME3, CDK11B, HAUS8, CHFR, KPNA2, NEK6, MAP3K11, HAUS4, HAUS6, HAUS5, CETN3, TIPIN, POLA1, CALR, RCC1, CCNG2, SESN3, RPA1, NCAPH, NUMA1, NIPBL, MACF1, PKD2, HINFP, PKD1, CLASP1, TRIP13, CSRP2BP…	0.00177372	up
GO:0032259	methylation	17	DNMT3A, EHMT1, CTCF, ICMT, ATRX, METTL14, WHSC1L1, PRMT6, PRDM5, GATAD2A, DNMT1, PCMT1, NSD1, RNF20, BAZ2A, FTSJ3, SUV420H1	0.00181212	up
GO:0016458	gene silencing	14	DNMT3A, DICER1, SMAD3, SMAD2, SIRT1, TARBP2, SRRT, TNRC6C, DGCR8, SND1, TNRC6B, TNRC6A, BAZ2A, SMARCA4	0.00189051	up
GO:0050767	regulation of neurogenesis	29	XRCC5, XRCC2, XRCC6, REST, GLI2, CALR, TTC3, TTL, EPHB2, PTK2, ATN1, ARHGDIA, SPP1, BMP2, ARHGEF1, PLXNB2, NF1, MAP1B, TP53, SLIT2, THY1, NOTCH3, SMO, NOTCH1, CCND2, NTRK2, PBX1, TGIF2, DBN1	0.00193342	up
GO:0033865	nucleoside bisphosphate metabolic process	6	PANK2, PANK3, HMGCR, PANK1, ACLY, PAPSS1	0.00218128	up
GO:0015012	heparan sulfate proteoglycan biosynthetic process	6	CSGALNACT1, NDST1, NDST2, EXT1, EXT2, HS2ST1	0.00218128	up
GO:0034330	cell junction organization	14	NF2, TAOK2, SMAD7, TGFB3, SMAD3, ACTN1, GJA1, CTNNA1, GJA5, THY1, GJC1, LAMA5, ITGA5, FN1	0.00224008	up
GO:0010390	histone monoubiquitination	5	LEO1, PAF1, RNF20, RNF40, CTR9	0.00224839	up
GO:0051960	regulation of nervous system development	32	XRCC5, XRCC2, XRCC6, REST, GLI2, CALR, TTC3, TTL, EPHB2, PTK2, ATN1, AGRN, ARHGDIA, SPP1, PRKCA, BMP2, ARHGEF1, PLXNB2, NF1, MAP1B, TP53, SLIT2, THY1, NOTCH3, SMO, NOTCH1, CCND2, NTRK2, PBX1, TGIF2, EIF2AK3, DBN1	0.00233486	up
GO:0046777	protein amino acid autophosphorylation	18	CSNK1G2, ERBB2, TAOK3, CAD, TRIM24, FER, STK4, AKT1, PTK2, EIF2AK1, FYN, NTRK2, PDGFRA, CDK12, PRKACA, YES1, EIF2AK3, MAP3K11	0.00237271	up
GO:0016441	posttranscriptional gene silencing	8	SRRT, TARBP2, DGCR8, SND1, DICER1, SMAD3, SMAD2, TNRC6A	0.00242679	up
GO:0035194	posttranscriptional gene silencing by RNA	8	SRRT, TARBP2, DGCR8, SND1, DICER1, SMAD3, SMAD2, TNRC6A	0.00242679	up
GO:0006403	RNA localization	20	PABPN1, XPO1, UPF1, NUP160, SMG6, SMG5, SMG7, HNRNPA2B1, NUP93, NUP188, CASC3, NXF1, ATXN2, POM121, KHSRP, MAGOHB, THOC5, GLE1, THOC2, XPO7	0.00252616	up
GO:0001503	ossification	22	BMP2, BMP1, PDLIM7, NF1, TGFB3, SMAD3, IGF2, COL2A1, GLI2, MMP2, COL5A2, SMO, CTSK, NAB2, SP3, PTN, EXT1, EXT2, EIF2AK3, BMP5, SPP1, CDH11	0.00256479	up
GO:0008219	cell death	92	MEF2C, SGPP1, PREX1, FASTK, RBM5, GJA1, PDCD4, CTNNB1, AKT1, CASP3, APP, NISCH, TIAM2, CASP9, ATXN10, SHARPIN, TARDBP, SPG20, SPG21, NGFRAP1, DAP, ACIN1, TOP2A, LUC7L3, RTEL1, DHCR24, MAGI3, ARHGEF2, TP53, ARHGEF17, GAN, STK4, AHR, DAPK1, NME6, ARHGEF11, SLTM, EP300, ZFYVE26, MGEA5, CDK11B, PSME3, EIF2AK3, NEK6, MAP3K11, TRAF1, BID, FUS, FKBP8, UBE2Z, APH1A, LITAF, MMD, AKAP13, RTKN, PPT1, SCRIB,…	0.00263908	up
GO:0007015	actin filament organization	16	ARHGEF2, ACTC1, ACTN4, PREX1, CALD1, FSCN1, ACTN1, EVL, GAS7, TTLL3, DSTN, PPP1R9B, PPP1R9A, SCIN, CFL1, DBN1	0.00276743	up
GO:0006406	mRNA export from nucleus	10	PABPN1, UPF1, NUP160, SMG6, SMG5, SMG7, GLE1, THOC5, NXF1, THOC2	0.00289783	up
GO:0031047	gene silencing by RNA	10	SRRT, TARBP2, TNRC6C, DGCR8, SND1, DICER1, SMAD3, SMAD2, TNRC6B, TNRC6A	0.00289783	up
GO:0010608	posttranscriptional regulation of gene expression	34	DICER1, SYNCRIP, CALR, APLP1, AKT1, SRRT, APP, TNRC6C, DGCR8, WIBG, SND1, HNRNPD, TNRC6B, FAM129A, TNRC6A, PRKCA, DHX9, UPF1, SMAD7, VHL, SMAD3, SMAD2, CASC3, HNRNPU, COG3, SARNP, TARBP2, ATXN2, TRNAU1AP, EIF2AK1, COG7, VEGFA, EIF2AK3, EIF2AK4	0.00291467	up
GO:0051028	mRNA transport	18	PABPN1, XPO1, UPF1, NUP160, SMG6, SMG5, SMG7, NUP93, NUP188, CASC3, NXF1, POM121, KHSRP, MAGOHB, THOC5, GLE1, THOC2, XPO7	0.00306708	up
GO:0006897	endocytosis	35	PDLIM7, LDLR, AP1G1, SNX17, WASF2, PPT1, SNX4, EPS15L1, CYTH2, ITSN2, APLP1, ELMOD3, APP, DOCK1, NECAP2, NECAP1, FCER1G, CAP1, HIP1, AP3B1, DBNL, RUFY1, LDLRAP1, CORO1C, SH3BP4, GAPVD1, FNBP1L, IGF2R, RAB22A, RAB34, LRP6, RIN2, SH3GL1, CLCN5, LRP5	0.00309529	up
GO:0010324	membrane invagination	35	PDLIM7, LDLR, AP1G1, SNX17, WASF2, PPT1, SNX4, EPS15L1, CYTH2, ITSN2, APLP1, ELMOD3, APP, DOCK1, NECAP2, NECAP1, FCER1G, CAP1, HIP1, AP3B1, DBNL, RUFY1, LDLRAP1, CORO1C, SH3BP4, GAPVD1, FNBP1L, IGF2R, RAB22A, RAB34, LRP6, RIN2, SH3GL1, CLCN5, LRP5	0.00309529	up
GO:0015014	heparan sulfate proteoglycan biosynthetic process, polysaccharide chain biosynthetic process	4	CSGALNACT1, EXT1, EXT2, HS2ST1	0.00318502	up
GO:0001525	angiogenesis	26	NRP2, DICER1, WASF2, CSPG4, JAG1, CTNNB1, EDNRA, PTK2, PLCD1, KLF5, COL18A1, VHL, ARHGAP24, UBP1, NCL, SLIT2, ANXA2, THY1, HDAC3, NOTCH1, MEOX2, NUS1, LAMA5, ID1, VEGFA, POFUT1	0.00321652	up
GO:0032774	RNA biosynthetic process	44	SCAF1, RSF1, TCOF1, MYEF2, POLR2A, ARNT, PRIM1, FUBP1, TROVE2, ERCC6, MAZ, TARDBP, NFAT5, MLLT1, TCEA2, GTF3C2, KDM5A, ERCC3, APEX1, GTF3C1, GTF3C4, TRIP13, KLF5, PHRF1, TAF4, POLR3H, TADA2A, TAF6, CREB1, GABPA, TP53, CDK9, CREB5, TRIM24, MBD1, AHR, PRDM4, GTF2I, ASH1L, MNT, SUPT16H, LCOR, NCOR1, MED1	0.00322157	up
GO:0016265	death	92	MEF2C, SGPP1, PREX1, FASTK, RBM5, GJA1, PDCD4, CTNNB1, AKT1, CASP3, APP, NISCH, TIAM2, CASP9, ATXN10, SHARPIN, TARDBP, SPG20, SPG21, NGFRAP1, DAP, ACIN1, TOP2A, LUC7L3, RTEL1, DHCR24, MAGI3, ARHGEF2, TP53, ARHGEF17, GAN, STK4, AHR, DAPK1, NME6, ARHGEF11, SLTM, EP300, ZFYVE26, MGEA5, CDK11B, PSME3, EIF2AK3, NEK6, MAP3K11, TRAF1, BID, FUS, FKBP8, UBE2Z, APH1A, LITAF, MMD, AKAP13, RTKN, PPT1, SCRIB,…	0.00325578	up
GO:0044265	cellular macromolecule catabolic process	92	LDLR, PPP2R5C, UBE2G2, SAE1, SENP5, DCPS, CASP3, CUL7, MGRN1, WWP2, WIBG, NSMCE2, USP11, NEURL1B, USP10, PSMD5, TBL1XR1, ANAPC5, DTL, FBXL20, DDB1, SOCS6, SOCS7, ERLIN2, ERLIN1, SOCS4, GAN, SOCS5, HERC2, HERC1, UBE2C, PJA2, UBE2O, PJA1, XPC, SEC61B, MAD2L1, KDM2A, TRIM33, MIB2, BACE1, USP20, PSME3, CAND1, PIAS2, FBXL7, USP22, PIAS1, ADAM19, SPOPL, CHFR, UBE2S, RNF20, SYVN1, UBE2Z, APH1A, RAB40C, …	0.0033626	up
GO:0016055	Wnt receptor signaling pathway	24	WNT5A, TBL1XR1, LZTS2, CSNK1G2, RYK, LDB1, TLE3, FZD1, CTNND1, TAX1BP3, CTNNB1, CSNK2A2, DKK3, CHD8, CCND1, DACT1, MACF1, NXN, INVS, GSK3B, HMGXB4, KREMEN1, LRP6, LRP5	0.00340127	up
GO:0009057	macromolecule catabolic process	98	PPP2R5C, USE1, SAE1, DCPS, CUL7, WWP2, WIBG, ANAPC5, DTL, SOCS6, SOCS7, SOCS4, SOCS5, ADAMTS9, SEC61B, MAD2L1, TRIM33, KDM2A, MIB2, BACE1, FBXL7, PIAS2, PIAS1, RNF20, SYVN1, UBA6, RAB40C, PPT1, UBE2V2, HNRNPD, RNF168, SMG6, SMG5, SMG7, CDC20, MALT1, CASC3, ATM, DNASE2, UBE2E3, TULP4, DCP2, UBA2, TDG, SMURF2, LDLR, UBE2G2, SENP5, AKT1, CASP3, MGRN1, NSMCE2, USP11, NEURL1B, USP10, PSMD5, DHCR24, TB…	0.00343519	up
GO:0035196	gene silencing by miRNA, production of miRNAs	6	SRRT, TARBP2, DGCR8, DICER1, SMAD3, SMAD2	0.00344857	up
GO:0080135	regulation of cellular response to stress	20	DBNL, POLH, TAOK2, PTPLAD1, TAOK3, UBE2V2, ZEB2, SIRT1, PDCD4, AKT1, EYA3, HDAC3, ERCC6, SEMA4C, MAPK8IP3, RNF168, NCOR1, RTEL1, SPP1, MAP3K11	0.00356915	up
GO:0035195	gene silencing by miRNA	7	SRRT, TARBP2, DGCR8, DICER1, SMAD3, SMAD2, TNRC6A	0.00359524	up
GO:0006297	nucleotide-excision repair, DNA gap filling	7	RFC5, RPA1, RFC3, RFC1, RFC2, POLD2, PCNA	0.00359524	up
GO:0007498	mesoderm development	16	TBX3, NF2, HTT, SMAD3, SMAD2, SNAI2, SLIT2, ACVR2B, MACF1, PPP2CA, VEGFA, PRKAR1A, PRKACA, EXT1, EXT2, MEST	0.00365056	up
GO:0032583	regulation of gene-specific transcription	24	MEF2C, TBL1XR1, BMP2, SMAD7, CREB1, XRCC6, TP53, TGFB3, SMAD3, IGF2, SMAD2, SIRT1, ARNT, CTNNB1, HDAC3, NOTCH1, SMARCB1, PEX14, NR2F2, RNF20, RBM15, NCOR1, NCOR2, SMARCA4	0.00374647	up
GO:0009101	glycoprotein biosynthetic process	27	GALNT2, OSTC, GALNT1, NDST1, FUT8, LDLR, NDST2, MAN1B1, HS2ST1, ST3GAL1, GALNT10, MPDU1, B3GNT1, OGT, RPN2, MGAT4B, MAN1A2, MOGS, MAN1C1, COG3, CSGALNACT1, MAN2A1, COG7, ST8SIA4, EXT1, POFUT1, EXT2	0.00388293	up
GO:0006793	phosphorus metabolic process	118	PRPF4B, STK35, TGFB3, PTPN23, PTPN21, LPAR1, PRKG1, DMPK, CSNK2A2, APP, PIK3C3, TLK1, PRKACA, IKBKAP, DBNL, STK24, CSNK1G2, WNK1, PTPRS, STK4, WEE1, MARK2, MAP4K3, MAP4K4, EIF2AK1, BAZ1B, NEK8, PDGFRA, EIF2AK3, EIF2AK4, NEK6, FGFR1, FGFR4, PTPLAD1, STK10, ERBB2, PTK7, EPHB4, G6PC3, EPHB2, PTK2, TTBK2, BMP2, PTPN9, TAOK2, MAP2K1, NIN, SMAD7, RYK, TAOK3, TRIO, SMAD2, ATM, NTRK2, GRK5, CDC42BPB, CDK…	0.00413049	up
GO:0006796	phosphate metabolic process	118	PRPF4B, STK35, TGFB3, PTPN23, PTPN21, LPAR1, PRKG1, DMPK, CSNK2A2, APP, PIK3C3, TLK1, PRKACA, IKBKAP, DBNL, STK24, CSNK1G2, WNK1, PTPRS, STK4, WEE1, MARK2, MAP4K3, MAP4K4, EIF2AK1, BAZ1B, NEK8, PDGFRA, EIF2AK3, EIF2AK4, NEK6, FGFR1, FGFR4, PTPLAD1, STK10, ERBB2, PTK7, EPHB4, G6PC3, EPHB2, PTK2, TTBK2, BMP2, PTPN9, TAOK2, MAP2K1, NIN, SMAD7, RYK, TAOK3, TRIO, SMAD2, ATM, NTRK2, GRK5, CDC42BPB, CDK…	0.00413049	up
GO:0033523	histone H2B ubiquitination	5	LEO1, PAF1, RNF20, RNF40, CTR9	0.00415925	up
GO:0034329	cell junction assembly	11	TAOK2, ITGA5, SMAD7, LAMA5, GJA1, ACTN1, CTNNA1, GJA5, THY1, FN1, GJC1	0.00420432	up
GO:0006351	transcription, DNA-dependent	43	SCAF1, RSF1, TCOF1, MYEF2, POLR2A, ARNT, FUBP1, TROVE2, ERCC6, MAZ, TARDBP, NFAT5, MLLT1, TCEA2, GTF3C2, KDM5A, ERCC3, APEX1, GTF3C1, GTF3C4, TRIP13, KLF5, PHRF1, TAF4, POLR3H, TADA2A, TAF6, CREB1, GABPA, TP53, CDK9, CREB5, TRIM24, MBD1, AHR, PRDM4, GTF2I, ASH1L, MNT, SUPT16H, LCOR, NCOR1, MED1	0.0042755	up
GO:0033043	regulation of organelle organization	34	TRIOBP, XPO1, CTCF, RCC1, LATS1, DSTN, MYCBP2, CTNNB1, SORBS3, CUL7, MACF1, CEP250, CLASP1, TLK1, RASA1, TERF2, CDK13, ARHGEF2, NF2, MAP1A, MAP1B, SMAD3, IGF2, TMSB10, HERC2, ATM, MAD2L1, GOLPH3, CFL1, SCIN, DNMT1, NEK6, MAP6D1, SPTAN1	0.00455094	up
GO:0001701	in utero embryonic development	29	SYVN1, XRCC2, FUT8, TGFB3, ARNT, RPA1, EDNRA, CHD8, HINFP, PKD2, PKD1, TERF2, TBX3, NASP, TAF8, GABPA, TP53, SMAD2, ICMT, RIC8A, MAN2A1, PLCG1, ZMIZ1, SP3, PDGFRA, MAPK8IP3, SMARCA4, MYH10, MED1	0.00456582	up
GO:0030900	forebrain development	26	NDST1, ZEB2, GLI2, PRKG1, APLP2, CTNNB1, APLP1, APP, NDE1, ALDH1A3, MKKS, TOP2B, NR2F2, TBX3, HTT, CREB1, NF1, NOTCH3, ATRX, NOTCH1, GNAQ, FYN, MAPK8IP3, NFIB, SMARCA4, MYH10	0.00460579	up
GO:0007346	regulation of mitotic cell cycle	26	TP53, SMAD3, IGF2, AFAP1L2, TRRAP, HERC2, UBE2C, RCC1, SCRIB, ATM, MYCBP2, PPP1R9B, HDAC3, CCND1, APP, MAD2L1, CUL7, PCBP4, DGKZ, USP22, CHFR, APBB1, NEK6, RAD17, SMARCA4, CDK13	0.00460579	up
GO:0015931	nucleobase, nucleoside, nucleotide and nucleic acid transport	21	PABPN1, XPO1, UPF1, NUP160, SMG6, SMG5, SMG7, HNRNPA2B1, GJA1, NUP93, NUP188, NXF1, CASC3, ATXN2, POM121, KHSRP, MAGOHB, THOC5, GLE1, THOC2, XPO7	0.00463537	up
GO:0006289	nucleotide-excision repair	13	DDB1, TP53, RPA1, RFC5, RFC3, ERCC5, ERCC6, XPC, RFC1, RFC2, POLD2, PCNA, ERCC3	0.00479495	up
GO:0010720	positive regulation of cell development	15	XRCC5, BMP2, ARHGEF1, XRCC2, PLXNB2, XRCC6, MAP1B, TGFB3, SMAD3, SMAD2, SLIT2, EPHB2, SMO, NOTCH1, ARHGDIA	0.00484868	up
GO:0016574	histone ubiquitination	7	LEO1, RNF168, PAF1, USP22, RNF20, RNF40, CTR9	0.00496461	up
GO:0035116	embryonic hindlimb morphogenesis	7	NOTCH1, DICER1, LRP6, RARB, MED1, SMARCA4, CTNNB1	0.00496461	up
GO:0031050	dsRNA fragmentation	6	SRRT, TARBP2, DGCR8, DICER1, SMAD3, SMAD2	0.00516933	up
GO:0007163	establishment or maintenance of cell polarity	12	NDE1, MACF1, ERBB2IP, CFL1, PTK7, CLASP1, NDC80, CAP1, SCRIB, CDC42BPB, MARK2, ARHGEF11	0.00541572	up
GO:0060348	bone development	22	BMP2, BMP1, PDLIM7, NF1, TGFB3, SMAD3, IGF2, COL2A1, GLI2, MMP2, COL5A2, SMO, CTSK, NAB2, SP3, PTN, EXT1, EXT2, EIF2AK3, BMP5, SPP1, CDH11	0.00580453	up
GO:0048193	Golgi vesicle transport	23	STX6, PACS1, SEC23A, COPA, AP1M1, RAB8A, SCAMP2, SEC31A, HTT, AP1G1, USE1, VPS41, CLTC, DTNBP1, ERGIC1, COG3, COG5, COG7, ARRB1, COPB1, STX16, SH3D19, COPE	0.00589253	up
GO:0006029	proteoglycan metabolic process	11	CSGALNACT1, BGN, NDST1, SULF2, NDST2, SULF1, CHST14, COL2A1, EXT1, EXT2, HS2ST1	0.00604127	up
GO:0043408	regulation of MAPKKK cascade	20	DBNL, NF2, TAOK2, PTPLAD1, ERBB2, NF1, TAOK3, ZEB2, IGF2, LPAR1, PDCD4, CTNNB1, AKT1, HDAC3, SORBS3, ERCC6, SEMA4C, MAPK8IP3, NCOR1, MAP3K11	0.0067354	up
GO:0015936	coenzyme A metabolic process	5	PANK2, PANK3, HMGCR, PANK1, ACLY	0.00692673	up
GO:0006513	protein monoubiquitination	5	LEO1, PAF1, RNF20, RNF40, CTR9	0.00692673	up
GO:0006491	N-glycan processing	5	MGAT4B, MAN2A1, MAN1A2, FUT8, ST8SIA4	0.00692673	up
GO:0043405	regulation of MAP kinase activity	24	PRKCA, DBNL, MAP2K1, HMGCR, PTPLAD1, ERBB2, NF1, TGFB3, PRDX2, ZEB2, LPAR1, PDCD4, TRIB2, SPRY4, SPRY1, ERCC6, RGS4, PPP2CA, SPRED2, MAPK8IP3, SHC1, SPRED1, DUSP6, MAP3K11	0.00707764	up
GO:0006487	protein amino acid N-linked glycosylation	11	MGAT4B, MAN2A1, OSTC, MAN1A2, FUT8, ST8SIA4, MPDU1, MAN1B1, MOGS, RPN2, MAN1C1	0.00716738	up
GO:0031053	primary microRNA processing	4	SRRT, DGCR8, SMAD3, SMAD2	0.00739891	up
GO:0043244	regulation of protein complex disassembly	12	TRIOBP, ARHGEF2, UPF1, MAP1A, SCIN, CFL1, MAP1B, MGEA5, CLASP1, SPTAN1, DSTN, MAP6D1	0.0074301	up
GO:0048332	mesoderm morphogenesis	10	MACF1, NF2, TBX3, HTT, PRKAR1A, SMAD3, PRKACA, SMAD2, EXT2, SLIT2	0.00795599	up
GO:0016567	protein ubiquitination	21	VHL, DDB1, SOCS7, UBE2V2, SAE1, HERC2, UBE2C, RBBP6, CTR9, AKT1, TRIM33, WWP2, MIB2, LEO1, CAND1, RNF168, PAF1, USP22, CHFR, RNF20, RNF40	0.00832327	up
GO:0006333	chromatin assembly or disassembly	22	RSF1, HP1BP3, MTA2, ARID4B, CBX3, CTCF, CBX1, TSPYL4, TSPYL5, CBX5, CHD9, CHD8, CDYL, BAZ1B, SMARCC1, SMARCC2, CHD2, SUPT16H, HIRIP3, CHD6, CHD4, CHD3	0.00839138	up
GO:0000271	polysaccharide biosynthetic process	11	CSGALNACT1, AKT1, B3GAT3, XYLT2, NDST1, XYLT1, B3GNT1, CERCAM, EXT1, EXT2, HS2ST1	0.00844909	up
GO:0051297	centrosome organization	9	HAUS4, NDE1, HAUS6, HAUS5, CEP250, CETN3, HAUS8, PCM1, CTNNB1	0.00862993	up
GO:0007219	Notch signaling pathway	12	NOTCH3, NOTCH2, APP, NOTCH1, APH1A, MIB2, MAML1, MAML2, JAG1, SPEN, POFUT1, RBM15	0.00863453	up
GO:0051094	positive regulation of developmental process	40	XRCC5, XRCC2, PDLIM7, FST, XRCC6, TGFB3, ITPKB, JAG1, GLI2, EPHB2, CTNNB1, ARNT, AKT1, ACIN1, BOC, FNDC3B, ARHGDIA, AP3B1, SH3PXD2B, PRKCA, BMP2, SMAD9, ARHGEF1, MAP2K1, VHL, PLXNB2, MAP1B, CD276, SMAD3, IGF2, SMAD2, BAD, SOCS5, SLIT2, SMO, ACVR2B, NOTCH1, SCIN, TGIF2, HDAC7	0.00867683	up
GO:0006730	one-carbon metabolic process	20	DNMT3A, PPME1, EHMT1, CTCF, ICMT, ATRX, METTL14, DHFR, WHSC1L1, PRMT6, PRDM5, GATAD2A, DNMT1, PCMT1, KDM3A, NSD1, BAZ2A, RNF20, FTSJ3, SUV420H1	0.00901713	up
GO:0017015	regulation of transforming growth factor beta receptor signaling pathway	10	PEG10, ING2, TRIM33, HTRA1, TGFB3, SMAD3, SKI, SMAD2, SMURF2, ZEB1	0.00949115	up
GO:0048858	cell projection morphogenesis	36	NRP2, ERBB2, PIP5K1C, GJA1, GLI2, MYCBP2, EPHB2, TTLL3, ALCAM, APP, PTK2, MACF1, B3GNT1, MKKS, TOP2B, PRKCA, ACTB, RAB8A, MAP2K1, RYK, CREB1, MAP1B, PCM1, GAS7, SLIT2, VASP, SMO, SEMA6A, NOTCH1, MAP1S, LAMA5, CYFIP1, MAPK8IP3, VCAN, APBB1, MYH10	0.00950034	up
GO:0030030	cell projection organization	50	NRP2, MTSS1, WASF2, GJA1, PIP5K1C, MTSS1L, LPAR1, GLI2, PRKG1, TTLL3, AKT1, APP, IFT20, ATXN10, MKKS, TOP2B, PRKCA, PCM1, VASP, SLIT2, SMO, SDCBP, VCAN, FGFR1, ERBB2, EPHB2, MYCBP2, ALCAM, PTK2, MACF1, B3GNT1, THBS4, KLF5, ACTB, RAB8A, MAP2K1, RYK, CREB1, MAP1B, VAV2, GAS7, PPP1R9B, SEMA6A, NOTCH1, MAP1S, LAMA5, CYFIP1, MAPK8IP3, APBB1, MYH10	0.00968726	up
GO:0000280	nuclear division	33	HAUS4, HAUS6, LZTS2, HAUS5, CETN3, TIPIN, RCC1, LATS1, CCNG2, LATS2, NUMA1, NDE1, NCAPH, NIPBL, TARDBP, CLASP1, ARHGEF2, PDS5B, MAP2K1, ANAPC5, PAPD7, NDC80, CDC20, UBE2C, WEE1, NCAPD2, MAD2L1, RCC2, CDK11B, HAUS8, CHFR, SMC1A, NEK6	0.00989357	up
GO:0007067	mitosis	33	HAUS4, HAUS6, LZTS2, HAUS5, CETN3, TIPIN, RCC1, LATS1, CCNG2, LATS2, NUMA1, NDE1, NCAPH, NIPBL, TARDBP, CLASP1, ARHGEF2, PDS5B, MAP2K1, ANAPC5, PAPD7, NDC80, CDC20, UBE2C, WEE1, NCAPD2, MAD2L1, RCC2, CDK11B, HAUS8, CHFR, SMC1A, NEK6	0.00989357	up
GO:0009968	negative regulation of signal transduction	33	TGFB3, FSTL3, PRDX2, CALR, AKT1, CHD8, PEG10, HTRA1, HMGXB4, PPP2CA, PRKCA, NF2, SMAD7, NF1, TAOK3, SOCS6, SOCS7, RGS19, SKI, SOCS4, SOCS5, TAX1BP3, SIRT1, THY1, DKK3, CCND1, HDAC3, RGS2, TRIM33, RGS4, LRP6, DGKZ, NCOR1	0.0105482	up
GO:0000278	mitotic cell cycle	50	HAUS4, HAUS6, LZTS2, HAUS5, CETN3, POLA1, TIPIN, RCC1, LATS1, CCNG2, LATS2, AKT1, NDE1, APP, NCAPH, NUMA1, NIPBL, CEP250, TARDBP, HINFP, CLASP1, PSMD5, KHDRBS1, CDC7, ARHGEF2, PDS5B, ANAPC5, MAP2K1, PAPD7, CDC20, NDC80, CDK6, UBE2C, WEE1, NCAPD2, CCND1, MAD2L1, RCC2, CCND2, PSMD10, PRDM5, CDK2AP1, CDK11B, PSME3, HAUS8, CHFR, SMC1A, KPNA2, NEK6, MAP3K11	0.0107074	up
GO:0001704	formation of primary germ layer	10	MACF1, NF2, HTT, PRKAR1A, SMAD3, PRKACA, SMAD2, EXT2, SLIT2, CTNNB1	0.0112396	up
GO:0001702	gastrulation with mouth forming second	7	ACVR2B, LDB1, LRP6, ZBTB17, NSD1, CTNNB1, LRP5	0.0113349	up
GO:0008360	regulation of cell shape	12	RHOJ, PALM, TAOK2, FYN, VEGFA, FBLIM1, CYFIP1, GAS7, AKAP2, RASA1, MYH10, FN1	0.0114913	up
GO:0045859	regulation of protein kinase activity	47	HMGCR, PTPLAD1, ERBB2, TGFB3, PRDX2, ZEB2, LPAR1, PDCD4, LATS1, SPRY4, LATS2, APLP2, TRIB2, EDNRA, AKT1, SPRY1, APP, CASP3, ERCC6, PPP2CA, SPRED2, MLLT1, PRKACA, SHC1, SPRED1, AGK, PRKCA, DBNL, MAP2K1, SPHK2, TAOK2, NF2, NF1, MALT1, IGF2, THY1, TARBP2, ACVR2B, CCND1, CCND2, RGS4, PRKAR1A, DGKZ, MAPK8IP3, PRKD3, DUSP6, MAP3K11	0.0116655	up
GO:0006915	apoptosis	75	MEF2C, SGPP1, PREX1, FASTK, RBM5, GJA1, PDCD4, CTNNB1, AKT1, CASP3, APP, NISCH, CASP9, TIAM2, SHARPIN, NGFRAP1, DAP, ACIN1, TOP2A, RTEL1, LUC7L3, DHCR24, MAGI3, ARHGEF2, TP53, ARHGEF17, STK4, AHR, DAPK1, NME6, ARHGEF11, SLTM, EP300, PSME3, CDK11B, EIF2AK3, NEK6, TRAF1, BID, FKBP8, UBE2Z, APH1A, LITAF, AKAP13, RTKN, PPT1, SCRIB, APLP1, SLC11A2, PEG10, DOCK1, TRAF4, HIP1, CKAP2, ACTC1, TAOK2, HTT, …	0.0126149	up
GO:0000087	M phase of mitotic cell cycle	33	HAUS4, HAUS6, LZTS2, HAUS5, CETN3, TIPIN, RCC1, LATS1, CCNG2, LATS2, NUMA1, NDE1, NCAPH, NIPBL, TARDBP, CLASP1, ARHGEF2, PDS5B, MAP2K1, ANAPC5, PAPD7, NDC80, CDC20, UBE2C, WEE1, NCAPD2, MAD2L1, RCC2, CDK11B, HAUS8, CHFR, SMC1A, NEK6	0.0127278	up
GO:0022415	viral reproductive process	13	XRCC5, WWP2, SMARCB1, HTATSF1, XRCC6, PSIP1, SMAD3, DEK, THOC5, THOC2, UBP1, PCSK5, NFIA	0.0127503	up
GO:0010769	regulation of cell morphogenesis involved in differentiation	15	ARHGEF1, SMAD7, PLXNB2, MAP1B, TGFB3, SMAD3, SMAD2, SLIT2, TTC3, TTL, THY1, EPHB2, PTK2, ARHGDIA, SPP1	0.0129335	up
GO:0006405	RNA export from nucleus	10	PABPN1, UPF1, NUP160, SMG6, SMG5, SMG7, GLE1, THOC5, NXF1, THOC2	0.0132183	up
GO:0032582	negative regulation of gene-specific transcription	11	MEF2C, TBL1XR1, HDAC3, BMP2, SMAD7, SMAD3, PEX14, RBM15, NCOR1, NCOR2, SMARCA4	0.0133605	up
GO:0043549	regulation of kinase activity	48	HMGCR, PTPLAD1, ERBB2, TGFB3, PRDX2, ZEB2, LPAR1, PDCD4, LATS1, SPRY4, LATS2, APLP2, TRIB2, AKT1, EDNRA, SPRY1, APP, CASP3, ERCC6, PPP2CA, SPRED2, MLLT1, PRKACA, SHC1, SPRED1, AGK, PRKCA, DBNL, MAP2K1, SPHK2, TAOK2, NF2, NF1, MALT1, IGF2, VAV2, THY1, TARBP2, ACVR2B, CCND1, CCND2, RGS4, PRKAR1A, DGKZ, MAPK8IP3, PRKD3, DUSP6, MAP3K11	0.0135507	up
GO:0045664	regulation of neuron differentiation	22	ARHGEF1, PLXNB2, MAP1B, REST, GLI2, CALR, SLIT2, TTL, TTC3, THY1, EPHB2, NOTCH3, NOTCH1, PTK2, ATN1, CCND2, NTRK2, PBX1, TGIF2, DBN1, ARHGDIA, SPP1	0.0139506	up
GO:0016571	histone methylation	7	EHMT1, WHSC1L1, PRMT6, PRDM5, NSD1, RNF20, SUV420H1	0.0143588	up
GO:0042981	regulation of apoptosis	96	XRCC5, MEF2C, XRCC2, PREX1, FASTK, RBM5, TGFB3, PRDX2, AKT1, CASP3, APP, TIAM2, CASP9, PCBP4, DNAJC5, NGFRAP1, DAP, RARB, DDAH2, TOP2A, RTEL1, IP6K2, DHCR24, PRKCA, ARHGEF2, ACTN4, TP53, ADNP, ACTN1, ARHGEF17, PRKCE, STK4, DAPK1, NME6, ARHGEF11, SMO, IGF2R, SCIN, VEGFA, CFL1, MNT, PSME3, EIF2AK3, MAP3K11, NMNAT1, CAMK1D, TRAF1, BID, HMGB1, ING3, YWHAZ, SYVN1, APH1A, PAFAH2, ERBB2, AKAP13, COL2A1,…	0.0145325	up
GO:0031023	microtubule organizing center organization	9	HAUS4, NDE1, HAUS6, HAUS5, CEP250, CETN3, HAUS8, PCM1, CTNNB1	0.0149745	up
GO:0007167	enzyme linked receptor protein signaling pathway	46	FMOD, FGFR1, MTSS1, MPZL1, FGFR4, FUT8, NDST1, LTBP3, ERBB2, FST, TGFB3, FSTL1, EPHB4, EPHB2, AKT1, RGMB, PTK2, PTN, SHC1, AGRN, RAPGEF1, GIGYF1, PLAT, BMP2, SMAD9, NIN, SMAD7, CREB1, PTPRA, SMAD3, SOCS7, TRIO, IGF2, SKI, SMAD2, SOCS5, SS18, ACVR2B, ERBB2IP, ID1, VEGFA, ARF4, NTRK2, PDGFRA, SMURF2, EIF2AK3	0.0152491	up
GO:0007243	protein kinase cascade	49	NDST1, TGFB3, ITPKB, PRDX2, LPAR1, PRKCSH, LATS2, AKT1, TICAM2, SPRED2, SHC1, PRKACA, SPRED1, PRKCA, DBNL, IKBKAP, SRPK2, WNK1, SOCS6, STK4, SRPK1, MARK2, DAPK1, IFNAR1, MAP4K3, TYK2, SS18, MAP4K4, PIAS1, MAP3K11, WNT5A, FGFR1, PTPLAD1, ERBB2, ERCC6, PPP2CA, PKD2, PKD1, MAP2K1, TAOK2, TAOK3, NF1, MALT1, IGF2, ICK, FYN, RGS4, MAPK8IP3, DUSP6	0.0163309	up
GO:0035239	tube morphogenesis	21	BMP2, TBX3, DICER1, PTK7, ZEB2, GLI2, LGR4, SCRIB, VASP, CTNNB1, GZF1, EDNRA, PFN1, NOTCH1, GPC3, LAMA5, VEGFA, CFL1, MKKS, PBX1, IFT52	0.0165932	up
GO:0032200	telomere organization	8	XRCC5, TNKS1BP1, RFC1, SMG6, WRAP53, XRCC6, TERF2, RTEL1	0.0166459	up
GO:0006457	protein folding	27	COPA, FKBP9, FKBP8, PPIL1, TTC9C, PDIA6, PDIA5, CALR, CANX, SEC63, DNAJC18, MPDU1, PPIL4, MKKS, DNAJC5, QSOX1, PPWD1, ERP29, SACS, PPIE, PPIH, HSP90B1, PPIB, CCT8, FKBP14, DNAJB1, FKBP10	0.0166491	up
GO:0048285	organelle fission	33	HAUS4, HAUS6, LZTS2, HAUS5, CETN3, TIPIN, RCC1, LATS1, CCNG2, LATS2, NUMA1, NDE1, NCAPH, NIPBL, TARDBP, CLASP1, ARHGEF2, PDS5B, MAP2K1, ANAPC5, PAPD7, NDC80, CDC20, UBE2C, WEE1, NCAPD2, MAD2L1, RCC2, CDK11B, HAUS8, CHFR, SMC1A, NEK6	0.0171619	up
GO:0012501	programmed cell death	75	MEF2C, SGPP1, PREX1, FASTK, RBM5, GJA1, PDCD4, CTNNB1, AKT1, CASP3, APP, NISCH, CASP9, TIAM2, SHARPIN, NGFRAP1, DAP, ACIN1, TOP2A, RTEL1, LUC7L3, DHCR24, MAGI3, ARHGEF2, TP53, ARHGEF17, STK4, AHR, DAPK1, NME6, ARHGEF11, SLTM, EP300, PSME3, CDK11B, EIF2AK3, NEK6, TRAF1, BID, FKBP8, UBE2Z, APH1A, LITAF, AKAP13, RTKN, PPT1, SCRIB, APLP1, SLC11A2, PEG10, DOCK1, TRAF4, HIP1, CKAP2, ACTC1, TAOK2, HTT, …	0.0175379	up
GO:0001707	mesoderm formation	9	MACF1, NF2, HTT, PRKAR1A, SMAD3, PRKACA, SMAD2, EXT2, SLIT2	0.0176935	up
GO:0006023	aminoglycan biosynthetic process	7	CSGALNACT1, B3GAT3, XYLT2, XYLT1, B3GNT1, EXT1, EXT2	0.0179013	up
GO:0032990	cell part morphogenesis	36	NRP2, ERBB2, PIP5K1C, GJA1, GLI2, MYCBP2, EPHB2, TTLL3, ALCAM, APP, PTK2, MACF1, B3GNT1, MKKS, TOP2B, PRKCA, ACTB, RAB8A, MAP2K1, RYK, CREB1, MAP1B, PCM1, GAS7, SLIT2, VASP, SMO, SEMA6A, NOTCH1, MAP1S, LAMA5, CYFIP1, MAPK8IP3, VCAN, APBB1, MYH10	0.0179213	up
GO:0045667	regulation of osteoblast differentiation	10	ACVR2B, BMP2, PDLIM7, CD276, FZD1, SMAD3, CDK6, SKI, HDAC7, CTNNB1	0.0179328	up
GO:0019058	viral infectious cycle	10	XRCC5, WWP2, SMARCB1, HTATSF1, XRCC6, PSIP1, DEK, UBP1, PCSK5, NFIA	0.0179328	up
GO:0051338	regulation of transferase activity	49	HMGCR, PTPLAD1, ERBB2, TGFB3, PRDX2, ZEB2, LPAR1, PDCD4, LATS1, SPRY4, LATS2, APLP2, TRIB2, AKT1, EDNRA, SPRY1, APP, CASP3, ERCC6, PPP2CA, SPRED2, MLLT1, SHC1, PRKACA, SPRED1, AGK, PRKCA, DBNL, MAP2K1, SPHK2, TAOK2, NF2, NF1, MALT1, IGF2, VAV2, THY1, TARBP2, ACVR2B, CCND1, CCND2, RGS4, WRAP53, PRKAR1A, DGKZ, MAPK8IP3, PRKD3, DUSP6, MAP3K11	0.0179497	up
GO:0043413	biopolymer glycosylation	21	MGAT4B, GALNT2, OSTC, GALNT1, MAN1A2, LDLR, FUT8, MAN1B1, MOGS, MAN1C1, COG3, ST3GAL1, MAN2A1, GALNT10, COG7, ST8SIA4, MPDU1, B3GNT1, OGT, RPN2, POFUT1	0.0179686	up
GO:0070085	glycosylation	21	MGAT4B, GALNT2, OSTC, GALNT1, MAN1A2, LDLR, FUT8, MAN1B1, MOGS, MAN1C1, COG3, ST3GAL1, MAN2A1, GALNT10, COG7, ST8SIA4, MPDU1, B3GNT1, OGT, RPN2, POFUT1	0.0179686	up
GO:0006486	protein amino acid glycosylation	21	MGAT4B, GALNT2, OSTC, GALNT1, MAN1A2, LDLR, FUT8, MAN1B1, MOGS, MAN1C1, COG3, ST3GAL1, MAN2A1, GALNT10, COG7, ST8SIA4, MPDU1, B3GNT1, OGT, RPN2, POFUT1	0.0179686	up
GO:0051225	spindle assembly	6	HAUS4, HAUS6, HDAC3, HAUS5, HAUS8, NCOR1	0.0180382	up
GO:0043409	negative regulation of MAPKKK cascade	6	AKT1, HDAC3, NF2, NF1, TAOK3, NCOR1	0.0180382	up
GO:0000059	protein import into nucleus, docking	6	XPO1, IPO11, IPO8, TNPO2, XPO7, TNPO1	0.0180382	up
GO:0060070	Wnt receptor signaling pathway through beta-catenin	6	TBL1XR1, CCND1, CHD8, GSK3B, LRP6, CTNNB1	0.0180382	up
GO:0001822	kidney development	17	BMP2, NF1, SIX2, GLI2, SLIT2, GZF1, ACVR2B, SPRY1, GPC3, INVS, LAMA5, ALDH1A3, PKD2, ADAMTS1, PBX1, RARB, PCSK5	0.0184066	up
GO:0048812	neuron projection morphogenesis	31	NRP2, ERBB2, GJA1, PIP5K1C, GLI2, EPHB2, MYCBP2, ALCAM, APP, PTK2, MACF1, B3GNT1, TOP2B, PRKCA, ACTB, MAP2K1, RYK, CREB1, MAP1B, GAS7, SLIT2, VASP, SMO, SEMA6A, NOTCH1, MAP1S, MAPK8IP3, CYFIP1, VCAN, APBB1, MYH10	0.0185789	up
GO:0043067	regulation of programmed cell death	96	XRCC5, MEF2C, XRCC2, PREX1, FASTK, RBM5, TGFB3, PRDX2, AKT1, CASP3, APP, TIAM2, CASP9, PCBP4, DNAJC5, NGFRAP1, DAP, RARB, DDAH2, TOP2A, RTEL1, IP6K2, DHCR24, PRKCA, ARHGEF2, ACTN4, TP53, ADNP, ACTN1, ARHGEF17, PRKCE, STK4, DAPK1, NME6, ARHGEF11, SMO, IGF2R, SCIN, VEGFA, CFL1, MNT, PSME3, EIF2AK3, MAP3K11, NMNAT1, CAMK1D, TRAF1, BID, HMGB1, ING3, YWHAZ, SYVN1, APH1A, PAFAH2, ERBB2, AKAP13, COL2A1,…	0.0186746	up
GO:0016331	morphogenesis of embryonic epithelium	12	PFN1, HTT, LAMA5, ALDH1A3, CFL1, PTK7, ZEB2, IFT52, GLI2, TBX18, VASP, CTNNB1	0.0193014	up
GO:0006928	cell motion	60	NRP2, MTSS1, PLXNA2, HMGCR, WASF2, ZEB2, GLI2, PRKG1, DSTN, NDE1, APP, SPINT2, CAP1, MSN, NR2F2, TOP2B, PRKCA, CERCAM, VASP, SLIT2, CCNL2, ARHGEF11, SMO, TNS3, CFL1, SDCBP, VCAN, PALM, FUT8, ERBB2, CALD1, VIM, SCRIB, TPM4, MYCBP2, EPHB2, TPM3, ALCAM, PTK2, MACF1, B3GNT1, ARHGDIA, FN1, THBS4, ACTB, PLAT, MAP2K1, TAOK2, VHL, VAV2, SEMA6A, ITGA5, FYN, ID1, LAMA5, LRP6, MAPK8IP3, APBB1, LRP5, MYH10	0.0196629	up
GO:0000184	nuclear-transcribed mRNA catabolic process, nonsense-mediated decay	8	DCPS, UPF1, SMG6, DCP2, SMG5, WIBG, SMG7, CASC3	0.0199793	up
GO:0033365	protein localization in organelle	23	PACS1, BID, XPO1, YWHAZ, HTT, IPO11, TP53, TGFB3, SIX2, MIPEP, IPO8, COG3, AKT1, PPIH, SEC61B, MACF1, COG7, XPO7, TNPO2, KPNA2, TNPO1, SEC61A1, RERE	0.0200271	up
GO:0010941	regulation of cell death	96	XRCC5, MEF2C, XRCC2, PREX1, FASTK, RBM5, TGFB3, PRDX2, AKT1, CASP3, APP, TIAM2, CASP9, PCBP4, DNAJC5, NGFRAP1, DAP, RARB, DDAH2, TOP2A, RTEL1, IP6K2, DHCR24, PRKCA, ARHGEF2, ACTN4, TP53, ADNP, ACTN1, ARHGEF17, PRKCE, STK4, DAPK1, NME6, ARHGEF11, SMO, IGF2R, SCIN, VEGFA, CFL1, MNT, PSME3, EIF2AK3, MAP3K11, NMNAT1, CAMK1D, TRAF1, BID, HMGB1, ING3, YWHAZ, SYVN1, APH1A, PAFAH2, ERBB2, AKAP13, COL2A1,…	0.0205051	up
GO:0001656	metanephros development	10	SPRY1, BMP2, GPC3, LAMA5, NF1, SIX2, PBX1, RARB, SLIT2, GZF1	0.0207011	up
GO:0030509	BMP signaling pathway	10	ACVR2B, RGMB, BMP2, SMAD9, ID1, SMAD7, FST, SKI, FSTL1, SMURF2	0.0207011	up
GO:0000819	sister chromatid segregation	9	NCAPH, MAD2L1, PDS5B, NIPBL, PAPD7, NDC80, SMC1A, LATS1, NCAPD2	0.0207489	up
GO:0001667	ameboidal cell migration	9	NRP2, SMO, LAMA5, WASF2, CFL1, LRP6, ZEB2, CAP1, LRP5	0.0207489	up
GO:0000226	microtubule cytoskeleton organization	23	HAUS4, HAUS6, HAUS5, MAP1B, CETN3, NDC80, UBE2C, PCM1, RCC1, TTL, CTNNB1, TTLL3, SS18, NDE1, HDAC3, PTK2, MACF1, CEP250, MAP1S, CLASP1, HAUS8, SMC1A, NCOR1	0.0215125	up
GO:0010564	regulation of cell cycle process	19	CDC7, XPO1, TIPIN, CTCF, IGF2, HERC2, UBE2C, RCC1, CALR, ATM, MYCBP2, PPP1R9B, MAD2L1, CUL7, PCBP4, APBB1, NEK6, SMARCA4, CDK13	0.0217092	up
GO:0009411	response to UV	12	AKT1, ERCC5, CCND1, CASP3, ERCC6, XPC, CASP9, POLH, TP53, SCARA3, ERCC3, FEN1	0.0217538	up
GO:0050769	positive regulation of neurogenesis	12	XRCC5, SMO, NOTCH1, BMP2, XRCC2, ARHGEF1, PLXNB2, XRCC6, MAP1B, SLIT2, ARHGDIA, EPHB2	0.0217538	up
GO:0006265	DNA topological change	4	TOP2B, ERCC3, TOP2A, TOP3B	0.0223862	up
GO:0022403	cell cycle phase	53	LZTS2, XRCC2, LATS1, LATS2, AKT1, NDE1, APP, TARDBP, CDC7, KHDRBS1, ARHGEF2, ANAPC5, PAPD7, CDK6, UBE2C, WEE1, NCAPD2, CCND1, MAD2L1, RCC2, CCND2, CDK2AP1, CDK11B, HAUS8, CHFR, KPNA2, NEK6, MAP3K11, HAUS4, HAUS6, HAUS5, CETN3, TIPIN, POLA1, RCC1, CCNG2, RPA1, NUMA1, NCAPH, NIPBL, HINFP, CLASP1, TRIP13, PDS5B, MAP2K1, ILF3, NDC80, CDC20, ATM, HDAC3, ZNF318, SMC1A, NCOR1	0.0225865	up
GO:0006366	transcription from RNA polymerase II promoter	33	SCAF1, MYEF2, ARNT, POLR2A, FUBP1, ERCC6, MAZ, TARDBP, NFAT5, MLLT1, ERCC3, KDM5A, APEX1, TRIP13, KLF5, PHRF1, TAF4, TADA2A, TAF6, GABPA, CDK9, CREB5, TRIM24, MBD1, AHR, PRDM4, GTF2I, ASH1L, MNT, SUPT16H, LCOR, NCOR1, MED1	0.0227529	up
GO:0032392	DNA geometric change	6	HMGB1, MCM7, ERCC3, MCM4, MCM6, TOP3B	0.0230666	up
GO:0032508	DNA duplex unwinding	6	HMGB1, MCM7, ERCC3, MCM4, MCM6, TOP3B	0.0230666	up
GO:0009952	anterior/posterior pattern formation	22	TSHZ1, TBX3, HTT, LDB1, ZEB2, SMAD2, ATM, CTNNB1, SF3B1, ACVR2B, NOTCH1, EP300, MEOX2, HOXA6, LRP6, PBX1, NR2F2, POFUT1, TBX18, PCSK5, MLLT3, LRP5	0.0237462	up
GO:0009311	oligosaccharide metabolic process	8	MGAT4B, MAN2A1, MAN1A2, FUT8, ST8SIA4, MPDU1, MAN1B1, MOGS	0.0237512	up
GO:0007051	spindle organization	10	HAUS4, HAUS6, HDAC3, HAUS5, NDC80, HAUS8, RCC1, SMC1A, UBE2C, NCOR1	0.0237641	up
GO:0016051	carbohydrate biosynthetic process	18	FUT8, NDST1, CERCAM, G6PC3, HS2ST1, CSGALNACT1, AKT1, PGM3, B3GAT3, XYLT2, CHST10, XYLT1, GFPT1, MPDU1, B3GNT1, CHST14, EXT1, EXT2	0.0238553	up
GO:0030031	cell projection assembly	15	KLF5, MTSS1, RAB8A, WASF2, LPAR1, MTSS1L, PCM1, VAV2, TTLL3, LAMA5, SDCBP, CYFIP1, MKKS, MYH10, THBS4	0.0239619	up
GO:0000075	cell cycle checkpoint	16	DDB1, TP53, TIPIN, TRRAP, CCNG2, ATM, CCND1, XPC, MAD2L1, PCBP4, HINFP, DGKZ, CHFR, SMC1A, ERCC3, RAD17	0.0241078	up
GO:0007266	Rho protein signal transduction	9	RHOJ, ARHGEF1, PTPLAD1, CFL1, RTKN, MYO9B, TAX1BP3, ARHGDIA, ARHGEF11	0.0241604	up
GO:0032446	protein modification by small protein conjugation	21	VHL, DDB1, SOCS7, UBE2V2, SAE1, HERC2, UBE2C, RBBP6, CTR9, AKT1, TRIM33, WWP2, MIB2, LEO1, CAND1, RNF168, PAF1, USP22, CHFR, RNF20, RNF40	0.0243757	up
GO:0040007	growth	27	FGFR1, TGFB3, GLI2, AKT1, APP, ERCC5, BMP2, GATM, TAF8, SMAD2, ICMT, SOCS5, DDX5, VAT1, NOTCH3, SMO, NOTCH2, ACVR2B, NOTCH1, ERBB2IP, ZMIZ1, WHSC1L1, CYFIP1, CHRND, EMP3, BMP5, SMARCA4	0.0244849	up
GO:0044092	negative regulation of molecular function	44	PALM, RSF1, GNAI3, HMGCR, PRDX2, PDCD4, LATS1, LATS2, SPRY4, AKT1, S1PR3, SPRY1, CASP3, WWP2, PPP2CA, SPRED2, PKD2, MLLT1, PEX14, SPRED1, PSMD5, DHCR24, PRKCA, NF2, ANAPC5, SMAD7, NF1, TP53, IGF2, CDC20, UBE2C, SIRT1, THY1, TARBP2, SMO, MAD2L1, ID1, PSMD10, RGS4, PBX1, ZNF462, CAND1, PSME3, DUSP6	0.0248086	up
GO:0030163	protein catabolic process	75	PPP2R5C, UBE2G2, USE1, SAE1, SENP5, AKT1, CUL7, MGRN1, WWP2, NSMCE2, USP11, USP10, NEURL1B, PSMD5, TBL1XR1, ANAPC5, DTL, FBXL20, DDB1, SOCS6, SOCS7, ERLIN2, ERLIN1, GAN, SOCS4, HERC2, SOCS5, HERC1, UBE2C, PJA2, UBE2O, PJA1, SEC61B, MAD2L1, KDM2A, TRIM33, MIB2, BACE1, USP20, PIAS2, PSME3, CAND1, FBXL7, USP22, PIAS1, ADAM19, SPOPL, CHFR, RNF20, UBE2S, UBE2Z, SYVN1, APH1A, RAB40C, UBA6, PPT1, UBE2V2…	0.0249758	up
GO:0045944	positive regulation of transcription from RNA polymerase II promoter	48	MEF2C, CAMTA2, ABLIM3, XRCC6, TGFB3, ZEB1, GLI2, CTNNB1, ARNT, STAT6, CHD8, APP, SMARCB1, NFAT5, AGRN, YAP1, RARB, ERCC3, NFATC2, EGR1, TBL1XR1, BMP2, KLF12, CREB1, MAML1, MTA2, MAML2, TP53, SMAD3, SIX2, SMAD2, AHR, PRPF6, SREBF2, NOTCH1, NCOA1, EP300, ZMIZ1, VEGFA, PBX1, CAND1, ZNF462, RBM14, APBB1, RBM15, NFIB, MED1, SMARCA4	0.0254359	up
GO:0042733	embryonic digit morphogenesis	7	GNAQ, TBX3, LRP6, RAB23, IFT52, CTNNB1, LRP5	0.0266839	up
GO:0051129	negative regulation of cellular component organization	22	TRIOBP, HMGB1, ARHGEF2, ARHGEF1, SMAD7, MAP1A, MAP1B, TMSB10, TTC3, ATM, THY1, EPHB2, PTK2, MAD2L1, SCIN, DNMT1, CLASP1, TERF2, ARHGDIA, MAP6D1, SPP1, SPTAN1	0.0273386	up
GO:0018209	peptidyl-serine modification	9	PRKCA, AKT1, GALNT2, GALNT1, BGN, TTBK2, GSK3B, PRKACA, STK4	0.027946	up
GO:0008213	protein amino acid alkylation	9	EHMT1, WHSC1L1, PRMT6, PRDM5, PCMT1, ICMT, NSD1, RNF20, SUV420H1	0.027946	up
GO:0042475	odontogenesis of dentine-containing tooth	9	SMO, ACVR2B, BMP2, NF2, LAMA5, FST, PDGFRA, GLI2, CTNNB1	0.027946	up
GO:0006479	protein amino acid methylation	9	EHMT1, WHSC1L1, PRMT6, PRDM5, PCMT1, ICMT, NSD1, RNF20, SUV420H1	0.027946	up
GO:0060021	palate development	8	ACVR2B, TSHZ1, MEOX2, PDGFRA, PRRX1, TGFB3, SMAD2, COL2A1	0.0279852	up
GO:0070302	regulation of stress-activated protein kinase signaling pathway	13	AKT1, DBNL, HDAC3, ERCC6, TAOK2, PTPLAD1, TAOK3, SEMA4C, MAPK8IP3, ZEB2, NCOR1, PDCD4, MAP3K11	0.0282285	up
GO:0031175	neuron projection development	35	NRP2, FGFR1, ERBB2, PIP5K1C, GJA1, PRKG1, GLI2, MYCBP2, EPHB2, ALCAM, APP, PTK2, MACF1, ATXN10, B3GNT1, TOP2B, PRKCA, ACTB, MAP2K1, RYK, CREB1, MAP1B, GAS7, SLIT2, VASP, PPP1R9B, SMO, SEMA6A, NOTCH1, MAP1S, CYFIP1, MAPK8IP3, VCAN, APBB1, MYH10	0.0284718	up
GO:0051174	regulation of phosphorus metabolic process	60	HMGCR, TGFB3, PRDX2, ZEB2, LPAR1, PDCD4, LATS1, SPRY4, LATS2, AKT1, EDNRA, SPRY1, APP, CASP3, MCM7, SPRED2, SHC1, PRKACA, SPRED1, FAM129A, PRKCA, DBNL, PRKCE, THY1, TARBP2, CCND1, ACVR2B, CCND2, PRKD3, RAD17, MAP3K11, PTPLAD1, ERBB2, APLP2, TRIB2, ERCC6, PPP2CA, MLLT1, AGK, BMP2, NF2, SPHK2, MAP2K1, TAOK2, SMG6, SMG5, SMAD7, NF1, SMG7, YWHAB, SMAD3, IGF2, MALT1, VAV2, PPP1R9B, RGS4, PRKAR1A, MAPK…	0.0286105	up
GO:0019220	regulation of phosphate metabolic process	60	HMGCR, TGFB3, PRDX2, ZEB2, LPAR1, PDCD4, LATS1, SPRY4, LATS2, AKT1, EDNRA, SPRY1, APP, CASP3, MCM7, SPRED2, SHC1, PRKACA, SPRED1, FAM129A, PRKCA, DBNL, PRKCE, THY1, TARBP2, CCND1, ACVR2B, CCND2, PRKD3, RAD17, MAP3K11, PTPLAD1, ERBB2, APLP2, TRIB2, ERCC6, PPP2CA, MLLT1, AGK, BMP2, NF2, SPHK2, MAP2K1, TAOK2, SMG6, SMG5, SMAD7, NF1, SMG7, YWHAB, SMAD3, IGF2, MALT1, VAV2, PPP1R9B, RGS4, PRKAR1A, MAPK…	0.0286105	up
GO:0007224	smoothened signaling pathway	6	SMO, FKBP8, NDST1, CDON, IFT52, GLI2	0.0289185	up
GO:0006891	intra-Golgi vesicle-mediated transport	6	COG3, PACS1, COG5, COPB1, STX16, COPE	0.0289185	up
GO:0070647	protein modification by small protein conjugation or removal	24	VHL, DDB1, SOCS7, UBE2V2, SAE1, TRRAP, HERC2, UBE2C, RBBP6, CTR9, AKT1, TRIM33, WWP2, MIB2, USP46, LEO1, USP20, RNF168, CAND1, PAF1, USP22, CHFR, RNF20, RNF40	0.0291808	up
GO:0010648	negative regulation of cell communication	34	GNAI3, TGFB3, FSTL3, PRDX2, CALR, AKT1, CHD8, PEG10, HTRA1, HMGXB4, PPP2CA, PRKCA, NF2, SMAD7, NF1, TAOK3, SOCS6, SOCS7, RGS19, SKI, SOCS4, SOCS5, TAX1BP3, SIRT1, THY1, DKK3, CCND1, HDAC3, RGS2, TRIM33, RGS4, LRP6, DGKZ, NCOR1	0.0298284	up
GO:0006302	double-strand break repair	12	RPA1, EYA3, XRCC5, XRCC2, XRCC6, POLA1, TP53, PAPD7, RNF168, UBE2V2, FEN1, TRIP13	0.0304765	up
GO:0051603	proteolysis involved in cellular protein catabolic process	72	PPP2R5C, UBE2G2, SAE1, SENP5, CUL7, MGRN1, WWP2, USP11, NSMCE2, USP10, NEURL1B, PSMD5, TBL1XR1, ANAPC5, DTL, FBXL20, DDB1, SOCS6, SOCS7, ERLIN2, ERLIN1, GAN, SOCS4, HERC2, SOCS5, HERC1, UBE2C, PJA2, UBE2O, PJA1, SEC61B, MAD2L1, KDM2A, TRIM33, MIB2, BACE1, USP20, FBXL7, PIAS2, PSME3, CAND1, USP22, PIAS1, ADAM19, SPOPL, CHFR, RNF20, UBE2S, UBE2Z, SYVN1, APH1A, RAB40C, UBA6, UBE2V2, MYCBP2, RNF168, …	0.0306562	up
GO:0048666	neuron development	44	NRP2, FGFR1, ERBB2, PIP5K1C, GJA1, PPT1, PRKG1, GLI2, MYCBP2, EPHB2, ALCAM, APP, PTK2, MACF1, ATXN10, DYNLL2, B3GNT1, AGRN, TOP2B, PRKCA, ACTB, MAP2K1, HTT, RYK, CREB1, MAP1B, FIG4, GAS7, SLIT2, VASP, THY1, PPP1R9B, SMO, SEMA6A, NOTCH1, GNAQ, MAP1S, VEGFA, NTRK2, CYFIP1, MAPK8IP3, VCAN, APBB1, MYH10	0.0308121	up
GO:0010551	regulation of specific transcription from RNA polymerase II promoter	16	MEF2C, TBL1XR1, SMAD7, CREB1, XRCC6, TP53, SMAD3, SIRT1, CTNNB1, HDAC3, NOTCH1, SMARCB1, RBM15, NCOR1, NCOR2, SMARCA4	0.0313433	up
GO:0007389	pattern specification process	36	FKBP8, TSHZ1, FST, ZEB2, ZEB1, GLI2, CTNNB1, EDNRA, SF3B1, HOXA6, RAB23, PKD2, MKKS, NR2F2, PCSK5, MLLT3, TBX3, HTT, LDB1, FTO, SMAD2, ATM, NOTCH2, SMO, ACVR2B, NOTCH1, EP300, MEOX2, VEGFA, LRP6, PBX1, IFT52, POFUT1, TBX18, BMP5, LRP5	0.0314779	up
GO:0006606	protein import into nucleus	15	XPO1, HTT, IPO11, TP53, TGFB3, SIX2, IPO8, AKT1, PPIH, SEC61B, TNPO2, XPO7, KPNA2, TNPO1, RERE	0.0315762	up
GO:0035137	hindlimb morphogenesis	7	NOTCH1, DICER1, LRP6, RARB, MED1, SMARCA4, CTNNB1	0.0319853	up
GO:0033692	cellular polysaccharide biosynthetic process	7	CSGALNACT1, AKT1, B3GNT1, CERCAM, EXT1, EXT2, HS2ST1	0.0319853	up
GO:0051098	regulation of binding	23	RSF1, TAF6, SMAD7, CALD1, RUNX1T1, SMAD3, MALT1, SMAD2, SKI, PRDX2, SIRT1, LDLRAP1, SMO, EP300, ID1, SMARCB1, PEX14, ZNF462, PBX1, NR2F2, APEX1, EIF2AK3, SMARCA4	0.0322857	up
GO:0051493	regulation of cytoskeleton organization	21	TRIOBP, XPO1, ARHGEF2, NF2, MAP1A, MAP1B, SMAD3, TMSB10, LATS1, CTNNB1, DSTN, MYCBP2, SORBS3, MACF1, CEP250, SCIN, CFL1, CLASP1, RASA1, SPTAN1, MAP6D1	0.0323938	up
GO:0007569	cell aging	8	TBX3, HTT, ZMIZ1, MNT, TP53, PDCD4, SIRT1, TERF2	0.0327024	up
GO:0006612	protein targeting to membrane	8	MACF1, TAOK2, EXOC4, MGEA5, SDCBP, ICMT, SEC63, SSR1	0.0327024	up
GO:0030203	glycosaminoglycan metabolic process	11	CSGALNACT1, BGN, B3GAT3, XYLT2, NDST1, XYLT1, EXT1, EXT2, FUCA1, HS2ST1, CHST1	0.0327251	up
GO:0016601	Rac protein signal transduction	4	DBNL, NISCH, PTPLAD1, WASF2	0.0333224	up
GO:0043632	modification-dependent macromolecule catabolic process	69	PPP2R5C, UBE2G2, SAE1, SENP5, CUL7, MGRN1, WWP2, USP11, NSMCE2, USP10, NEURL1B, PSMD5, TBL1XR1, ANAPC5, DTL, FBXL20, DDB1, SOCS6, SOCS7, ERLIN2, ERLIN1, GAN, SOCS4, HERC2, SOCS5, HERC1, UBE2C, PJA2, UBE2O, PJA1, MAD2L1, SEC61B, KDM2A, TRIM33, MIB2, USP20, FBXL7, PIAS2, PSME3, CAND1, USP22, PIAS1, SPOPL, CHFR, RNF20, UBE2S, UBE2Z, SYVN1, RAB40C, UBA6, UBE2V2, MYCBP2, RNF168, VHL, BIRC6, CDC20, MAL…	0.0334299	up
GO:0019941	modification-dependent protein catabolic process	69	PPP2R5C, UBE2G2, SAE1, SENP5, CUL7, MGRN1, WWP2, USP11, NSMCE2, USP10, NEURL1B, PSMD5, TBL1XR1, ANAPC5, DTL, FBXL20, DDB1, SOCS6, SOCS7, ERLIN2, ERLIN1, GAN, SOCS4, HERC2, SOCS5, HERC1, UBE2C, PJA2, UBE2O, PJA1, MAD2L1, SEC61B, KDM2A, TRIM33, MIB2, USP20, FBXL7, PIAS2, PSME3, CAND1, USP22, PIAS1, SPOPL, CHFR, RNF20, UBE2S, UBE2Z, SYVN1, RAB40C, UBA6, UBE2V2, MYCBP2, RNF168, VHL, BIRC6, CDC20, MAL…	0.0334299	up
GO:0007178	transmembrane receptor protein serine/threonine kinase signaling pathway	17	FMOD, BMP2, SMAD9, FUT8, LTBP3, SMAD7, CREB1, FST, TGFB3, SMAD3, FSTL1, SKI, SMAD2, ACVR2B, RGMB, ID1, SMURF2	0.0335065	up
GO:0044257	cellular protein catabolic process	72	PPP2R5C, UBE2G2, SAE1, SENP5, CUL7, MGRN1, WWP2, USP11, NSMCE2, USP10, NEURL1B, PSMD5, TBL1XR1, ANAPC5, DTL, FBXL20, DDB1, SOCS6, SOCS7, ERLIN2, ERLIN1, GAN, SOCS4, HERC2, SOCS5, HERC1, UBE2C, PJA2, UBE2O, PJA1, SEC61B, MAD2L1, KDM2A, TRIM33, MIB2, BACE1, USP20, FBXL7, PIAS2, PSME3, CAND1, USP22, PIAS1, ADAM19, SPOPL, CHFR, RNF20, UBE2S, UBE2Z, SYVN1, APH1A, RAB40C, UBA6, UBE2V2, MYCBP2, RNF168, …	0.033768	up
GO:0016032	viral reproduction	13	XRCC5, WWP2, SMARCB1, HTATSF1, XRCC6, PSIP1, SMAD3, DEK, THOC5, THOC2, UBP1, PCSK5, NFIA	0.0344567	up
GO:0010721	negative regulation of cell development	10	PTK2, ARHGEF1, SMAD7, NF1, TP53, TTC3, ARHGDIA, EPHB2, SPP1, THY1	0.0348643	up
GO:0008624	induction of apoptosis by extracellular signals	18	PRKCA, BID, ARHGEF2, APH1A, PREX1, FASTK, TRIO, AKAP13, ARHGEF17, BAD, VAV2, DAPK1, ARHGEF11, CASP3, TIAM2, NGFRAP1, DAP, PDCD6	0.0353849	up
GO:0000188	inactivation of MAPK activity	6	PRKCA, PPP2CA, RGS4, SPRED2, SPRED1, DUSP6	0.0356281	up
GO:0030010	establishment of cell polarity	6	NDE1, CFL1, PTK7, NDC80, SCRIB, ARHGEF11	0.0356281	up
GO:0051130	positive regulation of cellular component organization	26	PRKCA, ARHGEF1, ACTN4, NF2, PLXNB2, MAP1B, TGFB3, SMAD3, IGF2, PPT1, SMAD2, CALR, LDLRAP1, SLIT2, AHR, DSTN, AKT1, SORBS3, GSK3B, CFL1, MGEA5, DNMT1, CAND1, TERF2, ARHGDIA, HIP1	0.0364652	up
GO:0051054	positive regulation of DNA metabolic process	11	EYA3, STAT6, PDGFRA, TGFB3, MGEA5, RNF168, IGF2, SHC1, GLI2, CALR, TERF2	0.0365746	up
GO:0010553	negative regulation of specific transcription from RNA polymerase II promoter	9	MEF2C, TBL1XR1, HDAC3, SMAD7, SMAD3, RBM15, NCOR1, NCOR2, SMARCA4	0.0367055	up
GO:0001570	vasculogenesis	9	SMO, PTK2, CUL7, ZMIZ1, VEGFA, NTRK2, RASA1, SMARCA4, GJC1	0.0367055	up
GO:0006268	DNA unwinding during replication	5	HMGB1, MCM7, MCM4, MCM6, TOP3B	0.0374765	up
GO:0051170	nuclear import	15	XPO1, HTT, IPO11, TP53, TGFB3, SIX2, IPO8, AKT1, PPIH, SEC61B, TNPO2, XPO7, KPNA2, TNPO1, RERE	0.0375448	up
GO:0006284	base-excision repair	7	HMGB1, ERCC6, PRMT6, TDG, TP53, PCNA, APEX1	0.0379266	up
GO:0007017	microtubule-based process	34	HAUS4, HAUS6, HAUS5, CETN3, RCC1, TTL, TTLL3, CTNNB1, APP, PTK2, NDE1, MACF1, CEP250, DYNLL2, TUBB6, CLASP1, TUBA1A, KIF2A, MAP2K1, HTT, KIF17, MAP1B, NDC80, UBE2C, PCM1, KIF3C, SS18, HDAC3, MAP1S, HAUS8, SMC1A, KPNA2, NCOR1, MAP3K11	0.0381391	up
GO:0032886	regulation of microtubule-based process	10	XPO1, ARHGEF2, MACF1, CEP250, MAP1A, MAP1B, MKKS, CLASP1, CTNNB1, MAP6D1	0.0392443	up
GO:0007059	chromosome segregation	14	PDS5B, PAPD7, NDC80, CTCF, LATS1, SRPK1, NCAPD2, NCAPH, MAD2L1, NIPBL, SMC1A, TOP2A, NEK6, TOP3B	0.0413579	up
GO:0048754	branching morphogenesis of a tube	12	EDNRA, NOTCH1, BMP2, GPC3, TBX3, LAMA5, DICER1, VEGFA, PBX1, GLI2, CTNNB1, GZF1	0.0414441	up
GO:0046328	regulation of JNK cascade	12	AKT1, DBNL, HDAC3, ERCC6, TAOK2, PTPLAD1, TAOK3, MAPK8IP3, ZEB2, PDCD4, NCOR1, MAP3K11	0.0414441	up
GO:0006022	aminoglycan metabolic process	12	CSGALNACT1, BGN, B3GAT3, XYLT2, NDST1, XYLT1, B3GNT1, EXT1, EXT2, FUCA1, HS2ST1, CHST1	0.0414441	up
GO:0070507	regulation of microtubule cytoskeleton organization	9	XPO1, ARHGEF2, MACF1, CEP250, MAP1A, MAP1B, CLASP1, CTNNB1, MAP6D1	0.0417082	up
GO:0006024	glycosaminoglycan biosynthetic process	6	CSGALNACT1, B3GAT3, XYLT2, XYLT1, EXT1, EXT2	0.0432198	up
GO:0045216	cell-cell junction organization	8	NF2, SMAD7, TGFB3, SMAD3, GJA1, CTNNA1, GJA5, GJC1	0.0436581	up
GO:0000956	nuclear-transcribed mRNA catabolic process	8	DCPS, UPF1, SMG6, DCP2, SMG5, WIBG, SMG7, CASC3	0.0436581	up
GO:0001657	ureteric bud development	8	SPRY1, BMP2, GPC3, LAMA5, PBX1, RARB, SLIT2, GZF1	0.0436581	up
GO:0000279	M phase	42	HAUS4, HAUS6, LZTS2, HAUS5, XRCC2, CETN3, TIPIN, RCC1, CCNG2, LATS1, LATS2, RPA1, NUMA1, NDE1, NCAPH, NIPBL, TARDBP, CLASP1, TRIP13, ARHGEF2, PDS5B, MAP2K1, ANAPC5, PAPD7, CDC20, NDC80, ILF3, UBE2C, WEE1, ATM, NCAPD2, HDAC3, MAD2L1, RCC2, ZNF318, CDK11B, HAUS8, CHFR, SMC1A, KPNA2, NCOR1, NEK6	0.0437597	up
GO:0008156	negative regulation of DNA replication	7	NF2, GMNN, TGFB3, TIPIN, TP53, TERF2, RAD17	0.0445268	up
GO:0000723	telomere maintenance	7	XRCC5, TNKS1BP1, RFC1, SMG6, XRCC6, TERF2, RTEL1	0.0445268	up
GO:0030518	steroid hormone receptor signaling pathway	11	NCOA1, EGLN2, KDM3A, PIAS2, ARID1A, PIAS1, CALR, RBM14, PMEPA1, MED1, CTNNB1	0.0451903	up
GO:0000731	DNA synthesis during DNA repair	4	RFC3, POLH, WRNIP1, POLA1	0.0465202	up
GO:0010717	regulation of epithelial to mesenchymal transition	4	SMAD7, TGFB3, SMAD3, SMAD2	0.0465202	up
GO:0007093	mitotic cell cycle checkpoint	9	CCND1, MAD2L1, PCBP4, TP53, DGKZ, TRRAP, CHFR, ATM, RAD17	0.0471426	up
GO:0006402	mRNA catabolic process	9	DCPS, UPF1, SMG6, DCP2, SMG5, WIBG, SMG7, HNRNPD, CASC3	0.0471426	up
GO:0021955	central nervous system neuron axonogenesis	5	PRKCA, PTK2, GLI2, EPHB2, MYCBP2	0.0473696	up
GO:0043489	RNA stabilization	5	DHX9, VEGFA, HNRNPD, SYNCRIP, HNRNPU	0.0473696	up
GO:0048255	mRNA stabilization	5	DHX9, VEGFA, HNRNPD, SYNCRIP, HNRNPU	0.0473696	up
GO:0045898	regulation of transcriptional preinitiation complex assembly	3	HMGB1, CAND1, AHR	0.0475687	up
GO:0010627	regulation of protein kinase cascade	33	SLC44A2, SLC20A1, LITAF, PTPLAD1, ERBB2, TSPAN6, GJA1, ZEB2, LPAR1, PDCD4, CANT1, CTNNB1, AKT1, SORBS3, ERCC6, PPP2CA, TICAM2, RHOC, DBNL, NF2, TAOK2, NF1, TAOK3, PIGU, MALT1, IGF2, HDAC3, MIB2, SEMA4C, MAPK8IP3, NCOR1, NEK6, MAP3K11	0.0483007	up
GO:0000070	mitotic sister chromatid segregation	8	NCAPH, MAD2L1, PDS5B, NIPBL, PAPD7, NDC80, SMC1A, NCAPD2	0.0499254	up
GO:0030521	androgen receptor signaling pathway	8	NCOA1, KDM3A, PIAS2, ARID1A, PIAS1, PMEPA1, MED1, CTNNB1	0.0499254	up
GO:0007585	respiratory gaseous exchange	8	EDNRA, MAN2A1, NDST1, MAN1A2, FUT8, ADH5, MAPK8IP3, TRAF4	0.0499254	up

## Sheet: E60 vs E105
Table S8-4 Significantly enriched Gene ontology (GO) biological processes for the targets of DE miRNAs between E60 and E105.
GO ID	GO Terms	Gene number	Genes	p-value*	change direction(DE miRNAs)
GO:0051270	regulation of cell motion	6	LAMA2, ADAM10, NRP1, ETS1, TEK, TPM1	0.00264945	down
GO:0030155	regulation of cell adhesion	5	LAMA2, ADAM10, PODXL, ECM2, TPM1	0.00471245	down
GO:0007155	cell adhesion	10	LAMA2, F11R, AMIGO2, NRP1, EPDR1, CD93, FBLN5, TEK, PECAM1, ECM2	0.007336	down
GO:0022610	biological adhesion	10	LAMA2, F11R, AMIGO2, NRP1, EPDR1, CD93, FBLN5, TEK, PECAM1, ECM2	0.00740242	down
GO:0007160	cell-matrix adhesion	4	EPDR1, FBLN5, TEK, ECM2	0.00973708	down
GO:0031589	cell-substrate adhesion	4	EPDR1, FBLN5, TEK, ECM2	0.0126371	down
GO:0007517	muscle organ development	5	MYF6, LAMA2, CAV2, TPM1, SNTA1	0.020535	down
GO:0048514	blood vessel morphogenesis	5	NRP1, PLXDC1, NTRK2, PLCD3, SEMA3C	0.020535	down
GO:0014706	striated muscle tissue development	4	MYF6, CAV2, TPM1, SNTA1	0.0211457	down
GO:0042692	muscle cell differentiation	4	CAV2, SEMA4C, TPM1, SNTA1	0.0220852	down
GO:0060537	muscle tissue development	4	MYF6, CAV2, TPM1, SNTA1	0.0240321	down
GO:0010033	response to organic substance	9	CAV2, HERPUD1, ADAM10, ACSL1, ID2, DUSP1, RYR1, GNG11, ERO1L	0.0254532	down
GO:0055002	striated muscle cell development	3	CAV2, TPM1, SNTA1	0.0273306	down
GO:0007267	cell-cell signaling	8	LNPEP, CAV2, ADAM10, NRP1, EFNA1, TEK, NTRK2, SEMA3B	0.0284387	down
GO:0006928	cell motion	7	CAV2, NRP1, ETS1, PODXL, SEMA3C, SEMA3B, TPM1	0.029854	down
GO:0055001	muscle cell development	3	CAV2, TPM1, SNTA1	0.031344	down
GO:0001568	blood vessel development	5	NRP1, PLXDC1, NTRK2, PLCD3, SEMA3C	0.0331159	down
GO:0001944	vasculature development	5	NRP1, PLXDC1, NTRK2, PLCD3, SEMA3C	0.0357165	down
GO:0060538	skeletal muscle organ development	3	MYF6, CAV2, SNTA1	0.0423074	down
GO:0007519	skeletal muscle tissue development	3	MYF6, CAV2, SNTA1	0.0423074	down
GO:0043062	extracellular structure organization	4	P4HA1, FBLN5, ECM2, SNTA1	0.0469927	down
GO:0010975	regulation of neuron projection development	3	NRP1, EFNA1, NTRK2	0.0470395	down
GO:0006793	phosphorus metabolic process	10	PTPRB, CAV2, OBSCN, ADAM10, DUSP1, PPM1K, EFNA1, TEK, NTRK2, MYLK	0.0496402	down
GO:0006796	phosphate metabolic process	10	PTPRB, CAV2, OBSCN, ADAM10, DUSP1, PPM1K, EFNA1, TEK, NTRK2, MYLK	0.0496402	down
GO:0006397	mRNA processing	17	KHDRBS1, FUS, NOL3, TRA2B, HNRNPA2B1, TRA2A, RBMX, PNN, HNRNPA3, HNRNPH3, SFPQ, WDR77, HNRNPD, LSM11, RNPC3, RBM25, LUC7L3	8.55204e-11	up
GO:0008380	RNA splicing	16	FUS, NOL3, TRA2B, HNRNPA2B1, TRA2A, RBMX, PNN, HNRNPA3, HNRNPH3, SFPQ, WDR77, HNRNPD, LSM11, RNPC3, RBM25, LUC7L3	1.58575e-10	up
GO:0016071	mRNA metabolic process	17	KHDRBS1, FUS, NOL3, TRA2B, HNRNPA2B1, TRA2A, RBMX, PNN, HNRNPA3, HNRNPH3, SFPQ, WDR77, HNRNPD, LSM11, RNPC3, RBM25, LUC7L3	6.92008e-10	up
GO:0006396	RNA processing	19	KHDRBS1, FUS, NOL3, PUS1, TRA2B, HNRNPA2B1, TRA2A, RBMX, PNN, HNRNPA3, HNRNPH3, RRP1B, SFPQ, WDR77, HNRNPD, LSM11, RNPC3, RBM25, LUC7L3	4.0892e-09	up
GO:0000398	nuclear mRNA splicing, via spliceosome	10	FUS, HNRNPA3, HNRNPH3, TRA2B, TRA2A, HNRNPA2B1, WDR77, HNRNPD, RBMX, RBM25	3.8526e-07	up
GO:0000377	RNA splicing, via transesterification reactions with bulged adenosine as nucleophile	10	FUS, HNRNPA3, HNRNPH3, TRA2B, TRA2A, HNRNPA2B1, WDR77, HNRNPD, RBMX, RBM25	3.8526e-07	up
GO:0000375	RNA splicing, via transesterification reactions	10	FUS, HNRNPA3, HNRNPH3, TRA2B, TRA2A, HNRNPA2B1, WDR77, HNRNPD, RBMX, RBM25	3.8526e-07	up
GO:0003007	heart morphogenesis	5	MIB1, ACTC1, MYL3, MKKS, SMARCA4	0.00103951	up
GO:0048729	tissue morphogenesis	6	MIB1, ACTC1, MACF1, MYL3, MKKS, SMARCA4	0.00496159	up
GO:0007507	heart development	6	MIB1, ACTC1, MYL3, ERBB3, MKKS, SMARCA4	0.0103158	up
GO:0006695	cholesterol biosynthetic process	3	TM7SF2, IDI1, DHCR24	0.0109865	up
GO:0008219	cell death	11	FUS, PEG10, ACTC1, NOL3, ERBB3, RHOT1, SPG21, REEP1, PDCD4, LUC7L3, DHCR24	0.012331	up
GO:0016265	death	11	FUS, PEG10, ACTC1, NOL3, ERBB3, RHOT1, SPG21, REEP1, PDCD4, LUC7L3, DHCR24	0.0128981	up
GO:0008203	cholesterol metabolic process	4	TM7SF2, LDLR, IDI1, DHCR24	0.0189116	up
GO:0016126	sterol biosynthetic process	3	TM7SF2, IDI1, DHCR24	0.0194114	up
GO:0016125	sterol metabolic process	4	TM7SF2, LDLR, IDI1, DHCR24	0.0241351	up
GO:0030705	cytoskeleton-dependent intracellular transport	3	ACTC1, MACF1, RHOT1	0.0404672	up
GO:0045444	fat cell differentiation	3	RGS2, RUNX1T1, MKKS	0.0418901	up
GO:0006338	chromatin remodeling	3	NASP, CBX3, SMARCA4	0.0462696	up

## Sheet: E60 vs B3
Table S8-5 Significantly enriched Gene ontology (GO) biological processes for the targets of DE miRNAs between E60 and B3.
GO id	GO Terms	Gene number	Genes	p-value	change direction(DE miRNAs)
GO:0006631	fatty acid metabolic process	15	ACAA2, PLP1, ACADM, PTGES2, STAT5A, ABHD5, STAT5B, ADIPOR2, NDUFAB1, CRAT, ACSF2, HADHB, ACADVL, ACSL1, ETFDH	7.13318e-09	down
GO:0055002	striated muscle cell development	8	ACTA1, XIRP1, MYOZ1, NEURL2, TPM1, SNTA1, DVL1, TMOD1	6.3287e-07	down
GO:0055001	muscle cell development	8	ACTA1, XIRP1, MYOZ1, NEURL2, TPM1, SNTA1, DVL1, TMOD1	1.0624e-06	down
GO:0010927	cellular component assembly involved in morphogenesis	7	CD9, ACTA1, XIRP1, MYOZ1, NEURL2, TPM1, TMOD1	1.12804e-06	down
GO:0030239	myofibril assembly	6	ACTA1, XIRP1, MYOZ1, NEURL2, TPM1, TMOD1	1.41715e-06	down
GO:0051146	striated muscle cell differentiation	9	ACADM, ACTA1, XIRP1, MYOZ1, NEURL2, TPM1, SNTA1, DVL1, TMOD1	2.09384e-06	down
GO:0042692	muscle cell differentiation	10	ACADM, ACTA1, XIRP1, SEMA4C, MYOZ1, NEURL2, TPM1, SNTA1, DVL1, TMOD1	2.57166e-06	down
GO:0060537	muscle tissue development	10	MYF6, ZFAND5, ACADM, ACTA1, XIRP1, ELN, VAMP5, TPM1, SNTA1, DVL1	3.36931e-06	down
GO:0007517	muscle organ development	12	MYF6, ZFAND5, ACADM, ACTA1, XIRP1, FHL1, ELN, VAMP5, JPH1, TPM1, SNTA1, DVL1	6.33072e-06	down
GO:0031032	actomyosin structure organization	6	ACTA1, XIRP1, MYOZ1, NEURL2, TPM1, TMOD1	6.4821e-06	down
GO:0030036	actin cytoskeleton organization	12	ACTA1, XIRP1, XIRP2, ELN, SSH2, PDLIM3, MYOZ1, BCL6, NEURL2, TPM1, LPIN1, TMOD1	1.21352e-05	down
GO:0014706	striated muscle tissue development	9	MYF6, ACADM, ACTA1, XIRP1, ELN, VAMP5, TPM1, SNTA1, DVL1	1.98828e-05	down
GO:0030029	actin filament-based process	12	ACTA1, XIRP1, XIRP2, ELN, SSH2, PDLIM3, MYOZ1, BCL6, NEURL2, TPM1, LPIN1, TMOD1	2.21093e-05	down
GO:0019395	fatty acid oxidation	6	ACADVL, ACADM, ETFDH, ADIPOR2, CRAT, HADHB	3.48679e-05	down
GO:0034440	lipid oxidation	6	ACADVL, ACADM, ETFDH, ADIPOR2, CRAT, HADHB	3.48679e-05	down
GO:0043632	modification-dependent macromolecule catabolic process	17	RNF144B, UBE2G1, UBR3, TRIM63, UBAC1, CISH, MAP1LC3B, SQSTM1, FBXO30, FBXO31, FBXO32, ASB2, ASB5, NEURL2, RNF34, USP25, USP13	0.000134155	down
GO:0019941	modification-dependent protein catabolic process	17	RNF144B, UBE2G1, UBR3, TRIM63, UBAC1, CISH, MAP1LC3B, SQSTM1, FBXO30, FBXO31, FBXO32, ASB2, ASB5, NEURL2, RNF34, USP25, USP13	0.000134155	down
GO:0006635	fatty acid beta-oxidation	5	ACADVL, ACADM, ETFDH, CRAT, HADHB	0.000143592	down
GO:0006508	proteolysis	24	CFLAR, RNF144B, THOP1, UBE2G1, UBR3, C1S, ENPEP, TINAGL1, TRIM63, UBAC1, CISH, DDI2, MAP1LC3B, SQSTM1, FBXO30, FBXO31, FBXO32, ASB2, ASB5, NEURL2, USP25, RNF34, CTSH, USP13	0.000182209	down
GO:0051603	proteolysis involved in cellular protein catabolic process	17	RNF144B, UBE2G1, UBR3, TRIM63, UBAC1, CISH, MAP1LC3B, SQSTM1, FBXO30, FBXO31, FBXO32, ASB2, ASB5, NEURL2, RNF34, USP25, USP13	0.000222309	down
GO:0044257	cellular protein catabolic process	17	RNF144B, UBE2G1, UBR3, TRIM63, UBAC1, CISH, MAP1LC3B, SQSTM1, FBXO30, FBXO31, FBXO32, ASB2, ASB5, NEURL2, RNF34, USP25, USP13	0.000235169	down
GO:0042592	homeostatic process	19	HERPUD1, PLP1, MPZ, PTGES2, EPAS1, STAT5A, CSF1, STAT5B, PFKM, CD9, S1PR1, XIRP1, ATP2A2, MT2A, ATP2A1, BCL6, JPH1, CUTC, IFI6	0.000327916	down
GO:0030163	protein catabolic process	17	RNF144B, UBE2G1, UBR3, TRIM63, UBAC1, CISH, MAP1LC3B, SQSTM1, FBXO30, FBXO31, FBXO32, ASB2, ASB5, NEURL2, RNF34, USP25, USP13	0.000332674	down
GO:0009062	fatty acid catabolic process	5	ACADVL, ACADM, ETFDH, CRAT, HADHB	0.000389089	down
GO:0007519	skeletal muscle tissue development	6	MYF6, ACTA1, ELN, VAMP5, SNTA1, DVL1	0.000439246	down
GO:0060538	skeletal muscle organ development	6	MYF6, ACTA1, ELN, VAMP5, SNTA1, DVL1	0.000439246	down
GO:0030258	lipid modification	6	ACADVL, ACADM, ETFDH, ADIPOR2, CRAT, HADHB	0.000539737	down
GO:0048878	chemical homeostasis	14	HERPUD1, PLP1, MPZ, EPAS1, PFKM, CD9, S1PR1, ATP2A2, XIRP1, ATP2A1, MT2A, JPH1, CUTC, IFI6	0.001385	down
GO:0010033	response to organic substance	17	TXNIP, HERPUD1, ACTA1, STAT5A, STAT5B, ADIPOR2, CALCOCO2, FOXO1, IL6R, C1S, LPIN1, FOS, GLUL, ACSL1, DUSP1, EIF2AK2, PPP1R15A	0.00161216	down
GO:0044265	cellular macromolecule catabolic process	17	RNF144B, UBE2G1, UBR3, TRIM63, UBAC1, CISH, MAP1LC3B, SQSTM1, FBXO30, FBXO31, FBXO32, ASB2, ASB5, NEURL2, RNF34, USP25, USP13	0.00170609	down
GO:0032870	cellular response to hormone stimulus	7	FOS, DUSP1, STAT5A, STAT5B, ADIPOR2, FOXO1, LPIN1	0.00184838	down
GO:0019725	cellular homeostasis	13	PLP1, HERPUD1, MPZ, PTGES2, PFKM, CD9, S1PR1, ATP2A2, XIRP1, ATP2A1, MT2A, JPH1, IFI6	0.00188384	down
GO:0050801	ion homeostasis	12	CD9, HERPUD1, PLP1, MPZ, S1PR1, ATP2A2, XIRP1, MT2A, ATP2A1, CUTC, JPH1, IFI6	0.0020773	down
GO:0043603	cellular amide metabolic process	5	NAMPT, GPD1, STAT5A, STAT5B, IDH3B	0.00208994	down
GO:0015980	energy derivation by oxidation of organic compounds	7	ACADVL, NDUFS7, SDHB, NDUFAB1, IDH2, IDH3B, CRAT	0.00275622	down
GO:0006105	succinate metabolic process	3	SDHB, STAT5A, STAT5B	0.00320431	down
GO:0007010	cytoskeleton organization	12	ACTA1, XIRP1, XIRP2, ELN, SSH2, PDLIM3, MYOZ1, BCL6, NEURL2, TPM1, LPIN1, TMOD1	0.00339701	down
GO:0006091	generation of precursor metabolites and energy	10	ACADVL, NDUFS7, SDHB, SLC25A4, NDUFAB1, ETFDH, IDH2, IDH3B, CRAT, PFKM	0.00339924	down
GO:0006873	cellular ion homeostasis	11	CD9, HERPUD1, PLP1, MPZ, S1PR1, ATP2A2, XIRP1, MT2A, ATP2A1, JPH1, IFI6	0.00344204	down
GO:0055114	oxidation reduction	15	GPD2, GPD1, ACADM, NDUFAB1, IDH3B, AASS, GMPR, PHYH, NDUFS7, ACADVL, SDHB, HSDL2, ETFDH, IDH2, GFOD1	0.00355846	down
GO:0009057	macromolecule catabolic process	17	RNF144B, UBE2G1, UBR3, TRIM63, UBAC1, CISH, MAP1LC3B, SQSTM1, FBXO30, FBXO31, FBXO32, ASB2, ASB5, NEURL2, RNF34, USP25, USP13	0.00358606	down
GO:0006936	muscle contraction	7	ACTA1, PDE4D, ACTN2, TMOD4, TRIM63, TPM1, SNTA1	0.0037194	down
GO:0055082	cellular chemical homeostasis	11	CD9, HERPUD1, PLP1, MPZ, S1PR1, ATP2A2, XIRP1, MT2A, ATP2A1, JPH1, IFI6	0.00385174	down
GO:0006103	2-oxoglutarate metabolic process	3	STAT5A, STAT5B, IDH3B	0.00398006	down
GO:0034976	response to endoplasmic reticulum stress	4	HERPUD1, ATP2A1, EIF2AK2, PPP1R15A	0.00426486	down
GO:0043648	dicarboxylic acid metabolic process	4	SDHB, STAT5A, STAT5B, IDH3B	0.00426486	down
GO:0046395	carboxylic acid catabolic process	6	ACADVL, ACADM, ETFDH, AASS, CRAT, HADHB	0.00445879	down
GO:0016054	organic acid catabolic process	6	ACADVL, ACADM, ETFDH, AASS, CRAT, HADHB	0.00445879	down
GO:0006984	ER-nuclear signaling pathway	4	HERPUD1, ATP2A2, EIF2AK2, PPP1R15A	0.00463203	down
GO:0045214	sarcomere organization	3	XIRP1, NEURL2, TPM1	0.00576389	down
GO:0003012	muscle system process	7	ACTA1, PDE4D, ACTN2, TMOD4, TRIM63, TPM1, SNTA1	0.00585142	down
GO:0044242	cellular lipid catabolic process	5	ACADVL, ACADM, ETFDH, CRAT, HADHB	0.00629428	down
GO:0051591	response to cAMP	4	FOS, DUSP1, IL6R, C1S	0.0077353	down
GO:0006511	ubiquitin-dependent protein catabolic process	8	RNF144B, SQSTM1, UBE2G1, UBR3, FBXO31, TRIM63, USP25, USP13	0.00920352	down
GO:0009725	response to hormone stimulus	10	TXNIP, FOS, ACTA1, DUSP1, STAT5A, STAT5B, ADIPOR2, FOXO1, IL6R, LPIN1	0.00938106	down
GO:0030155	regulation of cell adhesion	6	S1PR1, STAT5A, CSF1, STAT5B, BCL6, TPM1	0.0106599	down
GO:0045333	cellular respiration	5	NDUFS7, SDHB, NDUFAB1, IDH2, IDH3B	0.0145619	down
GO:0051272	positive regulation of cell motion	5	S1PR1, CSF1, STAT5B, BCL6, IL6R	0.0150705	down
GO:0032989	cellular component morphogenesis	10	CD9, ACTA1, RTN4RL1, XIRP1, MYOZ1, BCL6, NEURL2, TPM1, DVL1, TMOD1	0.0150709	down
GO:0048872	homeostasis of number of cells	5	EPAS1, STAT5A, CSF1, STAT5B, BCL6	0.016121	down
GO:0070665	positive regulation of leukocyte proliferation	4	STAT5A, CSF1, STAT5B, BCL6	0.0169388	down
GO:0032946	positive regulation of mononuclear cell proliferation	4	STAT5A, CSF1, STAT5B, BCL6	0.0169388	down
GO:0009719	response to endogenous stimulus	10	TXNIP, FOS, ACTA1, DUSP1, STAT5A, STAT5B, ADIPOR2, FOXO1, IL6R, LPIN1	0.0169467	down
GO:0034620	cellular response to unfolded protein	3	HERPUD1, EIF2AK2, PPP1R15A	0.017327	down
GO:0030968	endoplasmic reticulum unfolded protein response	3	HERPUD1, EIF2AK2, PPP1R15A	0.017327	down
GO:0007167	enzyme linked receptor protein signaling pathway	9	TXNIP, FOS, ZFAND5, STAT5A, STAT5B, FOXO1, PPM1L, ECSIT, DVL1	0.0181413	down
GO:0046544	development of secondary male sexual characteristics	2	STAT5A, STAT5B	0.0192742	down
GO:0046356	acetyl-CoA catabolic process	3	SDHB, IDH2, IDH3B	0.0206142	down
GO:0006099	tricarboxylic acid cycle	3	SDHB, IDH2, IDH3B	0.0206142	down
GO:0006979	response to oxidative stress	6	TXNIP, FOS, DUSP1, EPAS1, ETFDH, TPM1	0.02162	down
GO:0019216	regulation of lipid metabolic process	5	SLC25A20, ACSL1, STAT5A, ABHD5, STAT5B	0.0233864	down
GO:0032103	positive regulation of response to external stimulus	4	S1PR1, STAT5A, STAT5B, IL6R	0.0240837	down
GO:0040018	positive regulation of multicellular organism growth	3	STAT5A, CSF1, STAT5B	0.0241389	down
GO:0019674	NAD metabolic process	3	NAMPT, GPD1, IDH3B	0.0241389	down
GO:0009109	coenzyme catabolic process	3	SDHB, IDH2, IDH3B	0.0259871	down
GO:0055066	di-, tri-valent inorganic cation homeostasis	7	HERPUD1, S1PR1, ATP2A2, MT2A, ATP2A1, CUTC, JPH1	0.0287582	down
GO:0046449	creatinine metabolic process	2	STAT5A, STAT5B	0.0287726	down
GO:0032825	positive regulation of natural killer cell differentiation	2	STAT5A, STAT5B	0.0287726	down
GO:0032823	regulation of natural killer cell differentiation	2	STAT5A, STAT5B	0.0287726	down
GO:0046543	development of secondary female sexual characteristics	2	STAT5A, STAT5B	0.0287726	down
GO:0001553	luteinization	2	STAT5A, STAT5B	0.0287726	down
GO:0048741	skeletal muscle fiber development	3	ACTA1, SNTA1, DVL1	0.029849	down
GO:0051187	cofactor catabolic process	3	SDHB, IDH2, IDH3B	0.0360372	down
GO:0048661	positive regulation of smooth muscle cell proliferation	3	S1PR1, STAT5B, IL6R	0.0360372	down
GO:0006084	acetyl-CoA metabolic process	3	SDHB, IDH2, IDH3B	0.0360372	down
GO:0000302	response to reactive oxygen species	4	TXNIP, FOS, DUSP1, TPM1	0.0361747	down
GO:0000255	allantoin metabolic process	2	STAT5A, STAT5B	0.0381796	down
GO:0001779	natural killer cell differentiation	2	STAT5A, STAT5B	0.0381796	down
GO:0006549	isoleucine metabolic process	2	STAT5A, STAT5B	0.0381796	down
GO:0060397	JAK-STAT cascade involved in growth hormone signaling pathway	2	STAT5A, STAT5B	0.0381796	down
GO:0048545	response to steroid hormone stimulus	6	TXNIP, FOS, ACTA1, DUSP1, STAT5B, IL6R	0.0388648	down
GO:0051270	regulation of cell motion	6	S1PR1, CSF1, STAT5B, BCL6, IL6R, TPM1	0.0396004	down
GO:0050871	positive regulation of B cell activation	3	STAT5A, STAT5B, BCL6	0.0404126	down
GO:0042391	regulation of membrane potential	5	CD9, PLP1, MPZ, XIRP1, IFI6	0.0411955	down
GO:0048747	muscle fiber development	3	ACTA1, SNTA1, DVL1	0.0449773	down
GO:0009060	aerobic respiration	3	SDHB, IDH2, IDH3B	0.0449773	down
GO:0007005	mitochondrion organization	5	NDUFS7, SLC25A4, EPAS1, ATP2A1, IFI6	0.0450745	down
GO:0006102	isocitrate metabolic process	2	IDH2, IDH3B	0.0474963	down
GO:0045647	negative regulation of erythrocyte differentiation	2	STAT5A, STAT5B	0.0474963	down
GO:0019530	taurine metabolic process	2	STAT5A, STAT5B	0.0474963	down
GO:0006573	valine metabolic process	2	STAT5A, STAT5B	0.0474963	down
GO:0045136	development of secondary sexual characteristics	2	STAT5A, STAT5B	0.0474963	down
GO:0070663	regulation of leukocyte proliferation	4	STAT5A, CSF1, STAT5B, BCL6	0.0479817	down
GO:0032944	regulation of mononuclear cell proliferation	4	STAT5A, CSF1, STAT5B, BCL6	0.0479817	down
GO:0033554	cellular response to stress	11	FOS, HERPUD1, RTN4RL1, EPAS1, ATP2A1, FBXO31, BCL6, EIF2AK2, TPM1, PPP1R15A, SESN1	0.0481244	down
GO:0006916	anti-apoptosis	6	CFLAR, SQSTM1, STAT5A, STAT5B, FOXO1, IFI6	0.0499385	down
GO:0051276	chromosome organization	57	ARID4B, CBX3, CBX1, LATS1, CBX5, SMARCD1, HIRIP3, TLK1, ACIN1, TOP2A, KDM5B, RTEL1, TADA2A, RCOR1, PAPD7, TP53, HMG20A, ARID1A, RBBP7, NCAPD2, EYA3, MAD2L1, RFC1, SMARCAL1, ASH1L, PRDM5, USP22, JMJD1C, PAF1, NSD1, SMARCA4, HMGB2, ING2, TADA3, TSPYL4, TSPYL5, ARID2, RPA1, CHD9, NCAPH, CHD8, SMARCB1, CHD2, LEO1, CHD6, CHD3, SMG6, NASP, SMC3, PHF17, HDAC2, WHSC1L1, DNMT1, PARP1, APBB1, HDAC7, RERE	5.88935e-08	up
GO:0051301	cell division	40	HAUS4, FZR1, CETN3, TIPIN, KATNB1, RCC1, SENP5, CCNG2, LATS1, DSTN, NDE1, NCAPH, CLASP1, CDK13, CDCA3, CDC7, ARHGEF2, KIF11, CKAP5, PAPD7, CDK6, CDC20, UBE2C, WEE1, SMC3, CDK2, NCAPD2, ARL3, CCND1, NOTCH1, MAD2L1, RCC2, CCND2, CFL1, CDK11B, HAUS8, MAPRE1, CHFR, NEK6, MYH10	2.04368e-07	up
GO:0022402	cell cycle process	60	XRCC2, LATS1, AKT1, NDE1, CEP250, PCBP4, CDKN2D, TARDBP, DHCR24, CDCA3, CDC7, KHDRBS1, ARHGEF2, KIF11, PAPD7, TP53, CDK6, UBE2C, WEE1, VASH1, CDK2, NCAPD2, CCND1, MAD2L1, RCC2, CCND2, CDK2AP1, TOP3A, CDK11B, HAUS8, STMN1, MAPRE1, CHFR, KPNA2, NEK6, HAUS4, FZR1, CETN3, KATNB1, TIPIN, POLA1, RCC1, CALR, CCNG2, SESN3, RPA1, NCAPH, MACF1, CLASP1, MKI67, CKAP5, CDC20, ILF3, SMC3, PPP1R9B, NOTCH2, GSK3…	8.27726e-07	up
GO:0007049	cell cycle	75	XRCC2, SENP5, LATS1, AKT1, NDE1, CEP250, PCBP4, CDKN2D, TARDBP, TLK1, CDCA3, DHCR24, CDC7, KHDRBS1, ARHGEF2, KIF11, TP53, PAPD7, CDK6, MCM3, UBE2C, WEE1, CDK2, VASH1, NCAPD2, MCM6, ARL3, CCND1, MAD2L1, RCC2, CCND2, PRDM5, MAPK3, TOP3A, CDK2AP1, CDK11B, MAPRE1, USP22, STMN1, HAUS8, MAPK7, CHFR, KPNA2, NEK6, HAUS4, EID1, FZR1, CETN3, KATNB1, TIPIN, POLA1, CALR, RCC1, CCNG2, SESN3, RPA1, NCAPH, MACF…	1.10514e-06	up
GO:0000278	mitotic cell cycle	44	HAUS4, FZR1, CETN3, POLA1, TIPIN, KATNB1, RCC1, CCNG2, LATS1, AKT1, NDE1, NCAPH, CEP250, CDKN2D, TARDBP, CLASP1, CDCA3, KHDRBS1, CDC7, ARHGEF2, KIF11, CKAP5, PAPD7, CDK6, CDC20, UBE2C, WEE1, SMC3, CDK2, NCAPD2, CCND1, MAD2L1, RCC2, CCND2, PSMD10, PRDM5, CDK2AP1, CDK11B, HAUS8, STMN1, MAPRE1, CHFR, KPNA2, NEK6	1.74766e-06	up
GO:0008380	RNA splicing	36	PRPF4B, TRA2B, PPIL1, TRA2A, RBM5, SF3B4, PNN, NONO, HNRNPA3, RBM4B, TARDBP, PPP2CA, HNRNPD, MAGOHB, LSM2, RBM25, LUC7L3, PPWD1, PABPN1, SRPK2, DHX9, TSEN54, CSTF3, PTBP1, HNRNPA2B1, RBMX, SRPK1, PRPF6, PPP1R9B, SFPQ, ZRANB2, CPSF7, LSM11, RNPC3, CSTF1, PRPF38B	4.4027e-06	up
GO:0016568	chromatin modification	35	ING2, TADA3, CBX3, ARID2, CHD9, CHD8, SMARCB1, SMARCD1, LEO1, TLK1, CHD6, KDM5B, CHD3, TADA2A, NASP, RCOR1, HMG20A, ARID1A, RBBP7, EYA3, PHF17, HDAC2, WHSC1L1, SMARCAL1, PRDM5, ASH1L, DNMT1, PAF1, JMJD1C, USP22, APBB1, NSD1, HDAC7, RERE, SMARCA4	5.17052e-06	up
GO:0022403	cell cycle phase	46	HAUS4, FZR1, XRCC2, CETN3, POLA1, TIPIN, KATNB1, RCC1, CCNG2, LATS1, RPA1, AKT1, NDE1, NCAPH, CDKN2D, TARDBP, CLASP1, CDCA3, KHDRBS1, CDC7, ARHGEF2, KIF11, MKI67, CKAP5, PAPD7, CDK6, CDC20, ILF3, UBE2C, WEE1, SMC3, CDK2, NCAPD2, CCND1, MAD2L1, RCC2, CCND2, CDK2AP1, TOP3A, CDK11B, MAPRE1, HAUS8, STMN1, CHFR, KPNA2, NEK6	6.00884e-06	up
GO:0006325	chromatin organization	43	HMGB2, ING2, TADA3, ARID4B, CBX3, CBX1, TSPYL4, ARID2, TSPYL5, CBX5, CHD9, CHD8, SMARCB1, SMARCD1, CHD2, LEO1, HIRIP3, TLK1, CHD6, KDM5B, CHD3, TADA2A, NASP, RCOR1, HMG20A, ARID1A, RBBP7, EYA3, PHF17, HDAC2, WHSC1L1, SMARCAL1, PRDM5, ASH1L, DNMT1, PAF1, JMJD1C, USP22, APBB1, NSD1, HDAC7, RERE, SMARCA4	7.25937e-06	up
GO:0000280	nuclear division	30	HAUS4, FZR1, CETN3, TIPIN, KATNB1, RCC1, LATS1, CCNG2, NDE1, NCAPH, TARDBP, CLASP1, CDCA3, ARHGEF2, KIF11, CKAP5, PAPD7, CDC20, UBE2C, CDK2, SMC3, WEE1, NCAPD2, MAD2L1, RCC2, CDK11B, HAUS8, MAPRE1, CHFR, NEK6	7.8749e-06	up
GO:0007067	mitosis	30	HAUS4, FZR1, CETN3, TIPIN, KATNB1, RCC1, LATS1, CCNG2, NDE1, NCAPH, TARDBP, CLASP1, CDCA3, ARHGEF2, KIF11, CKAP5, PAPD7, CDC20, UBE2C, CDK2, SMC3, WEE1, NCAPD2, MAD2L1, RCC2, CDK11B, HAUS8, MAPRE1, CHFR, NEK6	7.8749e-06	up
GO:0048598	embryonic morphogenesis	37	TSHZ1, TGFB3, PRRX1, COL2A1, ZEB2, ZEB1, GLI2, GJA5, SPRY2, MACF1, HOXA6, ALDH1A3, POU2F1, MKKS, PRKACA, FBN2, TBX3, HTT, LDB1, FTO, TP53, SMAD2, VASP, NOTCH2, NOTCH1, TULP3, LAMA5, CDON, CFL1, PRKAR1A, PBX1, IFT52, EXT1, NSD1, EXT2, PBX2, SMARCA4	9.98769e-06	up
GO:0000087	M phase of mitotic cell cycle	30	HAUS4, FZR1, CETN3, TIPIN, KATNB1, RCC1, LATS1, CCNG2, NDE1, NCAPH, TARDBP, CLASP1, CDCA3, ARHGEF2, KIF11, CKAP5, PAPD7, CDC20, UBE2C, CDK2, SMC3, WEE1, NCAPD2, MAD2L1, RCC2, CDK11B, HAUS8, MAPRE1, CHFR, NEK6	1.12044e-05	up
GO:0006397	mRNA processing	38	PRPF4B, TRA2B, PPIL1, TRA2A, RBM5, SF3B4, PNN, NONO, HNRNPA3, RBM4B, CNOT6L, TARDBP, HNRNPD, MAGOHB, LSM2, RBM25, LUC7L3, PPWD1, KHDRBS1, PABPN1, SRPK2, DHX9, TSEN54, CSTF3, RBM23, PTBP1, HNRNPA2B1, RBMX, SRPK1, PRPF6, SFPQ, ZRANB2, CPSF7, LSM11, CPSF6, RNPC3, CSTF1, PRPF38B	1.12341e-05	up
GO:0006260	DNA replication	27	HMGB2, POLA1, TIPIN, RPA1, PRIM1, CDKN2D, TOP2A, FEN1, CDC7, POLH, DTL, NASP, GINS4, PAPD7, RBBP7, MCM3, MCM4, CDK2, MCM6, RFC5, RFC1, RFC2, POLD2, TOP3A, CDK2AP1, NFIA, NFIB	1.17644e-05	up
GO:0048285	organelle fission	30	HAUS4, FZR1, CETN3, TIPIN, KATNB1, RCC1, LATS1, CCNG2, NDE1, NCAPH, TARDBP, CLASP1, CDCA3, ARHGEF2, KIF11, CKAP5, PAPD7, CDC20, UBE2C, CDK2, SMC3, WEE1, NCAPD2, MAD2L1, RCC2, CDK11B, HAUS8, MAPRE1, CHFR, NEK6	1.71556e-05	up
GO:0051726	regulation of cell cycle	38	XPO1, FZR1, SIPA1, TIPIN, AFAP1L2, CALR, RCC1, PDCD4, LATS1, CCNG2, SCRIB, CSNK2A2, AKT1, CASP3, CUL7, PCBP4, CDKN2D, CDK13, CDC7, TBX3, TP53BP2, TP53, CDK6, IGF2, UBE2C, CDK2, PPP1R9B, CCND1, HDAC2, MAD2L1, PRDM4, CCND2, DGKZ, USP22, CHFR, APBB1, NEK6, SMARCA4	2.21627e-05	up
GO:0016071	mRNA metabolic process	41	PRPF4B, TRA2B, PPIL1, TRA2A, RBM5, SF3B4, PNN, NONO, HNRNPA3, RBM4B, CNOT6L, WIBG, TARDBP, HNRNPD, MAGOHB, LSM2, RBM25, LUC7L3, PPWD1, KHDRBS1, PABPN1, SRPK2, DHX9, TSEN54, CSTF3, RBM23, SMG6, PTBP1, HNRNPA2B1, RBMX, SRPK1, PRPF6, DCP2, SFPQ, ZRANB2, CPSF7, LSM11, CPSF6, RNPC3, CSTF1, PRPF38B	2.26271e-05	up
GO:0007010	cytoskeleton organization	46	RHOJ, HAUS4, TRIOBP, MTSS1, LIMA1, CNN3, ABLIM3, SIPA1, WASF2, CETN3, CALR, PRKG1, RCC1, DAAM1, DSTN, NDE1, MACF1, CEP250, RALA, CLASP1, CNN1, FMNL3, ARHGEF2, ACTC1, KIF11, CKAP5, NF1, MAP1B, ARHGEF17, EVL, UBE2C, PCM1, SMC3, VASP, EPB41L2, PPP1R9B, SS18, RND3, SEMA6A, PPP1R9A, LAMA5, CFL1, HAUS8, STMN1, DBN1, MYH10	2.28659e-05	up
GO:0006259	DNA metabolic process	51	XRCC2, PRIM1, FANCL, NONO, CASP3, CDKN2D, PSIP1, TOP2A, RTEL1, CDC7, POLH, DTL, DFFA, PAPD7, TP53, MCM3, RBBP7, MCM4, CDK2, MCM6, EYA3, RFC5, RFC1, RFC2, SMARCAL1, CDK2AP1, TOP3A, KPNA2, HMGB2, TIPIN, POLA1, RPA1, SMARCB1, APEX1, FEN1, SMG6, TP53BP1, NASP, GINS4, SMC3, ATRX, DNASE2, PPIA, SFPQ, POLD2, DNMT1, PARP1, NFIA, IGFBP4, NFIB, NYNRIN	2.58337e-05	up
GO:0045449	regulation of transcription	185	MEF2C, SLC2A4RG, FST, TGFB3, CBX3, TCEAL8, REST, MED22, CNOT6, CBX5, PNN, NONO, HOXC6, MAMSTR, SIN3B, HOXC8, MIER2, ZFP90, TARDBP, SMARCD1, PSIP1, PATZ1, RARA, IKBKAP, TADA2A, ZNF644, ZNF646, RCOR1, ZNF814, HMG20A, SIX5, ARID1A, ZNF500, PRDM4, RFC1, SMARCAL1, PRDM5, TGIF2, VGLL3, PIAS1, PAF1, SMARCA4, EID1, CAMTA2, HMGB2, TSHZ1, ZNF132, TADA3, ZNF133, ZNF131, AFAP1L2, CALR, ZNF512, CXXC1, TCF20, …	3.17983e-05	up
GO:0006468	protein amino acid phosphorylation	62	PRPF4B, FASTK, STK35, TGFB3, FER, LPAR1, PRKG1, LATS1, DMPK, CSNK2A2, S1PR2, AKT1, CDK12, SHC1, PRKACA, TLK1, CDK14, CDK13, CDC7, SRPK2, IKBKAP, STK24, WNK1, CDK6, WEE1, SRPK1, CDK2, PRKD1, CCND1, MAST2, MAPK3, CFL1, NEK8, CDK2AP1, CAMK1, CDK11B, NRK, MAPK7, EIF2AK3, NEK6, EIF2AK4, CAMK1D, FGFR1, FGFR4, ERBB3, PTPLAD1, ERBB2, STK10, STK17B, EPHB4, EPHB2, YES1, NIN, CREB1, PTPRA, TAOK3, TRIO, SMAD…	3.65393e-05	up
GO:0000279	M phase	37	HAUS4, FZR1, XRCC2, CETN3, TIPIN, KATNB1, RCC1, CCNG2, LATS1, RPA1, NDE1, NCAPH, TARDBP, CLASP1, CDCA3, ARHGEF2, KIF11, MKI67, CKAP5, PAPD7, ILF3, CDC20, UBE2C, WEE1, SMC3, CDK2, NCAPD2, MAD2L1, RCC2, TOP3A, CDK11B, STMN1, HAUS8, MAPRE1, CHFR, KPNA2, NEK6	4.47502e-05	up
GO:0006261	DNA-dependent DNA replication	13	RPA1, PRIM1, HMGB2, RFC1, POLD2, CDK2AP1, POLA1, TIPIN, TOP3A, MCM3, MCM4, FEN1, MCM6	5.14468e-05	up
GO:0035295	tube development	28	FGFR4, TGFB3, ZEB2, GLI2, GJA5, ADA, SCRIB, ASAH1, EDNRA, SPRY2, SPRY1, GPC3, CD44, MKKS, PCSK5, TRAF4, TBX3, SMAD2, VASP, KDR, MAN2A1, NOTCH1, LAMA5, CFL1, MAPK8IP3, PBX1, IFT52, NFIB	5.77665e-05	up
GO:0009890	negative regulation of biosynthetic process	54	MEF2C, FST, TGFB3, CBX3, ZEB2, REST, ZEB1, GLI2, PDCD4, CBX5, EDNRA, SIN3B, HOXC8, KDM5B, KHDRBS1, LDB1, TP53, RBBP7, MXD3, MGEA5, LCOR, NSD1, EIF2AK3, EIF2AK4, SMARCA4, EID1, HMGB2, TIPIN, IGF2BP2, ITGB3, CALR, ZNF174, ATN1, POU2F1, TCF4, TNRC6A, ZNF423, TBX3, KLF12, TRIM27, S100A11, CD276, ILF3, IGF2, ATP1A1, SMAD2, SNAI2, UBP1, HDAC2, YWHAQ, DNMT1, SMURF2, APBB1, RBM15	8.92459e-05	up
GO:0048729	tissue morphogenesis	24	ACTC1, TBX3, HTT, FST, SMAD2, ZEB2, GLI2, SCRIB, VASP, NOTCH2, NOTCH1, GPC3, MACF1, CD44, LAMA5, ALDH1A3, PRKAR1A, CFL1, MKKS, PBX1, PRKACA, IFT52, EXT2, SMARCA4	0.000108752	up
GO:0031327	negative regulation of cellular biosynthetic process	52	MEF2C, FST, TGFB3, CBX3, ZEB2, REST, ZEB1, GLI2, PDCD4, CBX5, EDNRA, SIN3B, HOXC8, KDM5B, KHDRBS1, LDB1, TP53, RBBP7, MXD3, MGEA5, LCOR, NSD1, EIF2AK3, EIF2AK4, SMARCA4, EID1, HMGB2, TIPIN, IGF2BP2, CALR, ZNF174, ATN1, POU2F1, TCF4, TNRC6A, ZNF423, TBX3, KLF12, TRIM27, S100A11, CD276, ILF3, IGF2, ATP1A1, SMAD2, SNAI2, UBP1, HDAC2, YWHAQ, DNMT1, SMURF2, RBM15	0.000184677	up
GO:0010558	negative regulation of macromolecule biosynthetic process	51	MEF2C, FST, TGFB3, CBX3, ZEB2, REST, ZEB1, GLI2, PDCD4, CBX5, SIN3B, HOXC8, KDM5B, KHDRBS1, LDB1, TP53, RBBP7, MXD3, MGEA5, LCOR, NSD1, EIF2AK3, EIF2AK4, SMARCA4, EID1, HMGB2, TIPIN, IGF2BP2, ITGB3, CALR, ZNF174, ATN1, POU2F1, TCF4, TNRC6A, ZNF423, TBX3, KLF12, S100A11, CD276, TRIM27, ILF3, SMAD2, SNAI2, UBP1, HDAC2, YWHAQ, DNMT1, SMURF2, APBB1, RBM15	0.000186956	up
GO:0043244	regulation of protein complex disassembly	11	TRIOBP, ARHGEF2, LIMA1, MAP1A, CFL1, MAP1B, MGEA5, KATNB1, CLASP1, SPTAN1, DSTN	0.00034269	up
GO:0045786	negative regulation of cell cycle	14	CASP3, MAD2L1, HDAC2, PRDM4, TP53BP2, SIPA1, TP53, DGKZ, CDK6, APBB1, LATS1, PDCD4, SCRIB, SMARCA4	0.000379518	up
GO:0030036	actin cytoskeleton organization	26	RHOJ, TRIOBP, MTSS1, FMNL3, ARHGEF2, LIMA1, ACTC1, CNN3, NF1, WASF2, ARHGEF17, EVL, CALR, DAAM1, PRKG1, VASP, DSTN, EPB41L2, PPP1R9B, RND3, PPP1R9A, CFL1, RALA, CNN1, DBN1, MYH10	0.000539603	up
GO:0043407	negative regulation of MAP kinase activity	9	SPRY2, SPRY1, HMGCR, PPP2CA, NF1, SPRED2, SPRED1, PDCD4, SPRY4	0.000553646	up
GO:0001501	skeletal system development	33	FGFR1, AEBP1, TCOF1, TGFB3, PRRX1, COL2A1, POSTN, ZEB1, GLI2, GJA5, SUFU, HOXC6, HOXC8, HOXA6, COL12A1, PAPSS1, PCSK5, SPP1, BMP1, TBX3, NF1, SMAD5, IGF2, COL5A2, SMO, TULP3, PBX1, EXT1, EXT2, EIF2AK3, IGFBP4, BMP5, CDH11	0.00056554	up
GO:0006350	transcription	147	MEF2C, SLC2A4RG, CBX3, TCEAL8, MED22, REST, CNOT6, PNN, PRIM1, HOXC6, NONO, MAMSTR, SIN3B, HOXC8, MIER2, TARDBP, ZFP90, PSIP1, RARA, PATZ1, IKBKAP, TADA2A, ZNF644, RCOR1, ZNF814, HMG20A, SIX5, ARID1A, ZNF500, PRDM4, RFC1, PRDM5, VGLL3, TGIF2, PIAS1, PAF1, SMARCA4, EID1, CAMTA2, TSHZ1, ZNF132, TADA3, ZNF133, ZNF131, MYEF2, ZNF512, CXXC1, TCF20, ZNF326, SMARCB1, HOXA6, HNRNPD, LEO1, TCF4, EWSR1, HI…	0.000599999	up
GO:0030029	actin filament-based process	27	RHOJ, MTSS1, TRIOBP, LIMA1, CNN3, WASF2, PRKG1, DAAM1, CALR, DSTN, RALA, CNN1, FMNL3, ACTC1, ARHGEF2, MYH3, NF1, ARHGEF17, EVL, VASP, EPB41L2, RND3, PPP1R9B, PPP1R9A, CFL1, DBN1, MYH10	0.000618031	up
GO:0060541	respiratory system development	16	FGFR4, TGFB3, SMAD2, GLI2, ASAH1, ADA, KDR, MAN2A1, SPRY2, NOTCH1, TULP3, LAMA5, ALDH1A3, POU2F1, MAPK8IP3, NFIB	0.000689816	up
GO:0060284	regulation of cell development	24	XRCC2, TBX3, PLXNB2, NF1, MAP1B, TP53, TGFB3, IGF2, SMAD2, REST, GLI2, CALR, TTC3, EPHB2, NOTCH3, SMO, NOTCH1, ATN1, CCND2, PBX1, TGIF2, DBN1, BOC, SPP1	0.000728584	up
GO:0033554	cellular response to stress	50	XRCC2, FANCL, NONO, CASP3, CASP9, PCBP4, CDKN2D, TLK1, FAM129A, TOP2A, GNL1, RTEL1, POLH, DTL, PAPD7, TP53, EYA3, RFC5, PYCR1, SMO, CCND1, RFC1, RFC2, VCAN, EIF2AK3, EIF2AK4, HMGB2, PTPLAD1, TIPIN, POLA1, RPA1, TNRC6A, APEX1, ETV5, FEN1, DHX9, FADS1, TP53BP1, TAOK3, MAP1B, SMC3, ATRX, HDAC2, SFPQ, GSK3B, POLD2, MAPK8IP3, DGKZ, PARP1, APBB1	0.000749534	up
GO:0006469	negative regulation of protein kinase activity	14	AKT1, TARBP2, SPRY2, CASP3, SPRY1, HMGCR, PPP2CA, NF1, SPRED2, IGF2, SPRED1, LATS1, PDCD4, SPRY4	0.000767887	up
GO:0001568	blood vessel development	27	NRP2, WASF2, CSPG4, PRRX1, GJA5, GJC1, EDNRA, AKT1, CUL7, CD44, KLF5, PLAT, COL18A1, RECK, TBX3, NF1, MMP19, ARHGAP24, UBP1, KDR, SMO, LAMA4, NOTCH1, MEOX2, LAMA5, POFUT1, SMARCA4	0.000792029	up
GO:0030030	cell projection organization	36	NRP2, MTSS1, FGFR1, LIMA1, ERBB3, ERBB2, WASF2, UCHL1, LPAR1, MTSS1L, PRKG1, GLI2, EPHB2, AKT1, MACF1, CD44, ATXN10, IFT20, MKKS, KLF5, ACTB, CREB1, MAP1B, VAV2, PCM1, VASP, PPP1R9B, SMO, SEMA6A, NOTCH1, ITGA6, LAMA5, MAPK8IP3, VCAN, APBB1, MYH10	0.0008397	up
GO:0010605	negative regulation of macromolecule metabolic process	61	MEF2C, FST, TGFB3, CBX3, ZEB2, REST, ZEB1, GLI2, PDCD4, CBX5, HOXC8, SIN3B, FAM129A, KDM5B, KHDRBS1, LDB1, TP53, RBBP7, UBE2C, MXD3, TARBP2, MAD2L1, MGEA5, LCOR, NSD1, EIF2AK3, EIF2AK4, SMARCA4, EID1, FZR1, HMGB2, TIPIN, IGF2BP2, ITGB3, CALR, ZNF174, SRRT, ATN1, PPP2CA, POU2F1, TCF4, TNRC6A, ZNF423, TBX3, KLF12, TRIM27, S100A11, CD276, CDC20, ILF3, IGF2, SMAD2, SNAI2, UBP1, HDAC2, PSMD10, YWHAQ, …	0.000842201	up
GO:0043009	chordate embryonic development	33	XRCC2, TGFB3, PRRX1, COL2A1, ZEB2, ZEB1, GLI2, ADA, EDNRA, HOXC6, RPA1, CHD8, DAB2, HOXA6, PCSK5, TBX3, HTT, NASP, TP53, SMAD2, VASP, RIC8A, SMO, MAN2A1, TULP3, MEOX2, CFL1, MAPK8IP3, PBX1, IFT52, POFUT1, SMARCA4, MYH10	0.0010535	up
GO:0033673	negative regulation of kinase activity	14	AKT1, TARBP2, SPRY2, CASP3, SPRY1, HMGCR, PPP2CA, NF1, SPRED2, IGF2, SPRED1, LATS1, PDCD4, SPRY4	0.00106275	up
GO:0032886	regulation of microtubule-based process	10	XPO1, ARHGEF2, MACF1, CEP250, MAP1A, MAP1B, KATNB1, MKKS, CLASP1, MAPRE1	0.00110538	up
GO:0006396	RNA processing	48	PRPF4B, TRA2B, PPIL1, TRA2A, RBM5, RBM6, SF3B4, PNN, NONO, HNRNPA3, RBM4B, SRRT, CNOT6L, TARDBP, PPP2CA, HNRNPD, MAGOHB, LSM2, PPWD1, LUC7L3, RBM25, KHDRBS1, PABPN1, SRPK2, DHX9, TSEN54, CSTF3, RBM23, PTBP1, HNRNPA2B1, SMAD2, RRP8, INTS10, RBMX, SRPK1, PRPF6, PPP1R9B, TARBP2, LARP7, SFPQ, ZRANB2, CPSF7, NOP58, LSM11, CPSF6, RNPC3, CSTF1, PRPF38B	0.00111396	up
GO:0001944	vasculature development	27	NRP2, WASF2, CSPG4, PRRX1, GJA5, GJC1, EDNRA, AKT1, CUL7, CD44, KLF5, PLAT, COL18A1, RECK, TBX3, NF1, MMP19, ARHGAP24, UBP1, KDR, SMO, LAMA4, NOTCH1, MEOX2, LAMA5, POFUT1, SMARCA4	0.00113196	up
GO:0030323	respiratory tube development	15	FGFR4, TGFB3, SMAD2, GLI2, ASAH1, ADA, KDR, MAN2A1, SPRY2, NOTCH1, LAMA5, MAPK8IP3, PCSK5, TRAF4, NFIB	0.00115689	up
GO:0010564	regulation of cell cycle process	16	CDC7, XPO1, FZR1, TIPIN, IGF2, UBE2C, CALR, RCC1, PPP1R9B, MAD2L1, CUL7, PCBP4, APBB1, NEK6, CDK13, SMARCA4	0.00121637	up
GO:0009792	embryonic development ending in birth or egg hatching	33	XRCC2, TGFB3, PRRX1, COL2A1, ZEB2, ZEB1, GLI2, ADA, EDNRA, HOXC6, RPA1, CHD8, DAB2, HOXA6, PCSK5, TBX3, HTT, NASP, TP53, SMAD2, VASP, RIC8A, SMO, MAN2A1, TULP3, MEOX2, CFL1, MAPK8IP3, PBX1, IFT52, POFUT1, SMARCA4, MYH10	0.00122345	up
GO:0010557	positive regulation of macromolecule biosynthetic process	55	MEF2C, TGFB3, ZEB1, GLI2, AKT1, WIBG, SMARCD1, SHC1, FAM129A, TP53, ARID1A, CDK2, PRPF6, NCOA1, CAND1, USP22, PIAS1, NSD1, SMARCA4, HMGB2, CAMTA2, ING2, ABLIM3, AFAP1L2, CALR, CHD8, RGMB, SMARCB1, POU2F1, MYOG, NFATC2, TCF4, ZNF423, KLF5, TBX3, KLF12, CREB1, TP53BP1, SMAD5, CD276, MSTN, CREB5, ILF3, IGF2, SMAD2, NOTCH1, HDAC2, EBF3, EBF2, EBF1, PBX1, PBX2, APBB1, RBM15, NFIB	0.0012251	up
GO:0045935	positive regulation of nucleobase, nucleoside, nucleotide and nucleic acid metabolic process	53	MEF2C, TGFB3, ZEB1, GLI2, SMARCD1, SHC1, TP53, ARID1A, CDK2, PRPF6, EYA3, NCOA1, MGEA5, CAND1, USP22, PIAS1, NSD1, SMARCA4, HMGB2, CAMTA2, ING2, ABLIM3, AFAP1L2, CALR, CHD8, RGMB, SMARCB1, POU2F1, MYOG, NFATC2, TCF4, ZNF423, KLF5, TBX3, KLF12, CREB1, TP53BP1, SMAD5, MSTN, CREB5, ILF3, IGF2, SMAD2, NOTCH1, HDAC2, EBF3, EBF2, EBF1, PBX1, PBX2, APBB1, RBM15, NFIB	0.00123152	up
GO:0060173	limb development	15	NOTCH2, NOTCH1, TULP3, TBX3, MEOX2, FTO, PRRX1, PBX1, COL2A1, IFT52, FBN2, PBX2, PCSK5, GJA5, SMARCA4	0.00127389	up
GO:0048736	appendage development	15	NOTCH2, NOTCH1, TULP3, TBX3, MEOX2, FTO, PRRX1, PBX1, COL2A1, IFT52, FBN2, PBX2, PCSK5, GJA5, SMARCA4	0.00127389	up
GO:0007389	pattern specification process	28	TSHZ1, FST, ZEB2, ZEB1, GLI2, HOXC6, EDNRA, HOXC8, HOXA6, MKKS, PCSK5, MLLT3, TBX3, HTT, LDB1, SMAD5, FTO, SMAD2, NOTCH2, SMO, NOTCH1, TULP3, MEOX2, PBX1, IFT52, POFUT1, PBX2, BMP5	0.00131218	up
GO:0051297	centrosome organization	8	HAUS4, NDE1, KIF11, CEP250, CKAP5, CETN3, HAUS8, PCM1	0.00135338	up
GO:0010604	positive regulation of macromolecule metabolic process	68	MEF2C, TGFB3, ZEB1, GLI2, AKT1, EDNRA, WIBG, SMARCD1, SHC1, FAM129A, TP53, ARID1A, UBE2C, CDK2, PRPF6, EYA3, NCOA1, CCND1, CCND2, MGEA5, CAND1, USP22, PIAS1, NSD1, SMARCA4, CAMTA2, FZR1, HMGB2, ING2, ABLIM3, AFAP1L2, CALR, SCRIB, CHD8, RGMB, SMARCB1, POU2F1, MYOG, NFATC2, TCF4, ZNF423, KLF5, TBX3, KLF12, CREB1, TP53BP1, SMAD5, CD276, MSTN, CDC20, SMAD2, CREB5, ILF3, IGF2, NOTCH1, HDAC2, EBF3, EBF…	0.00139703	up
GO:0007346	regulation of mitotic cell cycle	19	TP53, AFAP1L2, IGF2, UBE2C, RCC1, SCRIB, CDK2, PPP1R9B, CCND1, MAD2L1, CUL7, PCBP4, DGKZ, USP22, CHFR, APBB1, NEK6, SMARCA4, CDK13	0.00144237	up
GO:0051173	positive regulation of nitrogen compound metabolic process	54	MEF2C, TGFB3, ZEB1, GLI2, AKT1, SMARCD1, SHC1, TP53, ARID1A, CDK2, PRPF6, EYA3, NCOA1, MGEA5, CAND1, USP22, PIAS1, NSD1, SMARCA4, HMGB2, CAMTA2, ING2, ABLIM3, AFAP1L2, CALR, CHD8, RGMB, SMARCB1, POU2F1, MYOG, NFATC2, TCF4, ZNF423, KLF5, TBX3, KLF12, CREB1, TP53BP1, SMAD5, MSTN, CREB5, ILF3, IGF2, SMAD2, NOTCH1, HDAC2, EBF3, EBF2, EBF1, PBX1, PBX2, APBB1, RBM15, NFIB	0.00145693	up
GO:0033043	regulation of organelle organization	24	TRIOBP, XPO1, ARHGEF2, LIMA1, MAP1A, MAP1B, KATNB1, IGF2, RCC1, LATS1, DSTN, PLA2G4A, MAD2L1, CUL7, MACF1, CEP250, CFL1, DNMT1, CLASP1, TLK1, MAPRE1, NEK6, CDK13, SPTAN1	0.00157589	up
GO:0016310	phosphorylation	64	PRPF4B, FASTK, STK35, TGFB3, FER, LPAR1, PRKG1, LATS1, DMPK, CSNK2A2, S1PR2, AKT1, CDK12, SHC1, PRKACA, TLK1, CDK14, CDK13, CDC7, SRPK2, IKBKAP, STK24, WNK1, CDK6, WEE1, SRPK1, CDK2, PRKD1, CCND1, MAST2, MAPK3, CFL1, NEK8, CDK2AP1, CAMK1, CDK11B, NRK, MAPK7, EIF2AK3, EIF2AK4, NEK6, CAMK1D, FGFR1, FGFR4, ERBB3, PTPLAD1, ERBB2, STK10, STK17B, EPHB4, EPHB2, GALK1, YES1, AGK, NIN, CREB1, PTPRA, TAOK3…	0.00160661	up
GO:0070507	regulation of microtubule cytoskeleton organization	9	XPO1, ARHGEF2, MACF1, CEP250, MAP1A, MAP1B, KATNB1, CLASP1, MAPRE1	0.00162112	up
GO:0031111	negative regulation of microtubule polymerization or depolymerization	6	ARHGEF2, MAP1A, MAP1B, KATNB1, CLASP1, MAPRE1	0.00164142	up
GO:0051348	negative regulation of transferase activity	14	AKT1, TARBP2, SPRY2, CASP3, SPRY1, HMGCR, PPP2CA, NF1, SPRED2, IGF2, SPRED1, LATS1, PDCD4, SPRY4	0.00193943	up
GO:0033865	nucleoside bisphosphate metabolic process	5	PANK2, HMGCR, PANK1, ACLY, PAPSS1	0.00206627	up
GO:0031328	positive regulation of cellular biosynthetic process	56	MEF2C, TGFB3, ZEB1, GLI2, AKT1, WIBG, SMARCD1, SHC1, FAM129A, TP53, ARID1A, CDK2, PRPF6, NCOA1, CAND1, USP22, PIAS1, NSD1, SMARCA4, HMGB2, CAMTA2, ING2, ABLIM3, AFAP1L2, CALR, CHD8, RGMB, SMARCB1, POU2F1, MYOG, NFATC2, TCF4, ZNF423, KLF5, TBX3, KLF12, CREB1, TP53BP1, SMAD5, CD276, MSTN, CREB5, ILF3, IGF2, SMAD2, NOTCH1, PLA2G4A, HDAC2, EBF3, EBF2, EBF1, PBX1, PBX2, APBB1, RBM15, NFIB	0.00206707	up
GO:0045941	positive regulation of transcription	48	MEF2C, HMGB2, CAMTA2, ING2, ABLIM3, TGFB3, AFAP1L2, ZEB1, GLI2, RGMB, CHD8, SMARCB1, SMARCD1, POU2F1, MYOG, TCF4, NFATC2, ZNF423, KLF5, KLF12, TBX3, CREB1, TP53BP1, SMAD5, TP53, MSTN, ARID1A, CREB5, ILF3, SMAD2, CDK2, PRPF6, NCOA1, NOTCH1, HDAC2, EBF3, EBF2, EBF1, PBX1, CAND1, USP22, PIAS1, APBB1, NSD1, PBX2, RBM15, NFIB, SMARCA4	0.00207963	up
GO:0010628	positive regulation of gene expression	49	MEF2C, TGFB3, ZEB1, GLI2, SMARCD1, TP53, ARID1A, CDK2, PRPF6, NCOA1, CAND1, PIAS1, USP22, NSD1, SMARCA4, CAMTA2, HMGB2, ING2, ABLIM3, AFAP1L2, CHD8, RGMB, SMARCB1, POU2F1, MYOG, TCF4, NFATC2, ZNF423, KLF5, TBX3, KLF12, TP53BP1, CREB1, SMAD5, MSTN, SMAD2, ILF3, CREB5, NOTCH1, HDAC2, EBF3, EBF2, EBF1, DNMT1, PBX1, RBM15, PBX2, APBB1, NFIB	0.00222104	up
GO:0031023	microtubule organizing center organization	8	HAUS4, NDE1, KIF11, CEP250, CKAP5, CETN3, HAUS8, PCM1	0.00234813	up
GO:0035108	limb morphogenesis	14	NOTCH2, NOTCH1, TULP3, TBX3, FTO, PRRX1, PBX1, COL2A1, IFT52, FBN2, PBX2, PCSK5, GJA5, SMARCA4	0.00256288	up
GO:0035107	appendage morphogenesis	14	NOTCH2, NOTCH1, TULP3, TBX3, FTO, PRRX1, PBX1, COL2A1, IFT52, FBN2, PBX2, PCSK5, GJA5, SMARCA4	0.00256288	up
GO:0033273	response to vitamin	11	PLA2G4A, CCND1, CD44, BCHE, FADS1, CDKN2D, MAP1B, RARA, IGFBP2, SPP1, MEST	0.00272594	up
GO:0045934	negative regulation of nucleobase, nucleoside, nucleotide and nucleic acid metabolic process	44	MEF2C, EID1, HMGB2, FST, TGFB3, TIPIN, CBX3, ZEB2, REST, ZEB1, CALR, GLI2, PDCD4, CBX5, ZNF174, EDNRA, SIN3B, HOXC8, ATN1, POU2F1, TCF4, KDM5B, ZNF423, KHDRBS1, KLF12, TBX3, LDB1, S100A11, TRIM27, TP53, ILF3, SMAD2, SNAI2, RBBP7, UBP1, MXD3, HDAC2, YWHAQ, DNMT1, SMURF2, LCOR, NSD1, RBM15, SMARCA4	0.00274208	up
GO:0040029	regulation of gene expression, epigenetic	12	ATRX, SRRT, TARBP2, HDAC2, SMARCD1, TRIM27, DNMT1, IGF2, SMAD2, ARID1A, TNRC6A, SMARCA4	0.00275355	up
GO:0009891	positive regulation of biosynthetic process	56	MEF2C, TGFB3, ZEB1, GLI2, AKT1, WIBG, SMARCD1, SHC1, FAM129A, TP53, ARID1A, CDK2, PRPF6, NCOA1, CAND1, USP22, PIAS1, NSD1, SMARCA4, HMGB2, CAMTA2, ING2, ABLIM3, AFAP1L2, CALR, CHD8, RGMB, SMARCB1, POU2F1, MYOG, NFATC2, TCF4, ZNF423, KLF5, TBX3, KLF12, CREB1, TP53BP1, SMAD5, CD276, MSTN, CREB5, ILF3, IGF2, SMAD2, NOTCH1, PLA2G4A, HDAC2, EBF3, EBF2, EBF1, PBX1, PBX2, APBB1, RBM15, NFIB	0.00282721	up
GO:0006338	chromatin remodeling	10	CHD8, HDAC2, SMARCB1, NASP, SMARCD1, CBX3, ARID1A, CHD6, RERE, SMARCA4	0.00290971	up
GO:0002009	morphogenesis of an epithelium	14	HTT, ZEB2, GLI2, SCRIB, VASP, NOTCH2, GPC3, CD44, LAMA5, ALDH1A3, CFL1, MKKS, PBX1, IFT52	0.00306317	up
GO:0051052	regulation of DNA metabolic process	15	POLH, S100A11, TP53, TGFB3, TIPIN, IGF2, CALR, GLI2, CDK2, EYA3, PPP2CA, MGEA5, SHC1, KPNA2, RTEL1	0.00335223	up
GO:0045165	cell fate commitment	17	FGFR4, SMAD5, TP53, MYEF2, SMAD2, GLI2, KDR, NOTCH3, NOTCH2, SPRY2, SMO, CASP3, NOTCH1, SPRY1, CDON, POU2F1, SMARCA4	0.00344861	up
GO:0016481	negative regulation of transcription	40	MEF2C, EID1, HMGB2, FST, CBX3, ZEB2, ZEB1, REST, CALR, GLI2, PDCD4, CBX5, ZNF174, SIN3B, HOXC8, ATN1, POU2F1, TCF4, KDM5B, ZNF423, KHDRBS1, KLF12, TBX3, LDB1, TRIM27, TP53, SMAD2, ILF3, SNAI2, RBBP7, UBP1, MXD3, HDAC2, YWHAQ, DNMT1, SMURF2, LCOR, NSD1, RBM15, SMARCA4	0.00348734	up
GO:0051172	negative regulation of nitrogen compound metabolic process	44	MEF2C, EID1, HMGB2, FST, TGFB3, TIPIN, CBX3, ZEB2, REST, ZEB1, CALR, GLI2, PDCD4, CBX5, ZNF174, EDNRA, SIN3B, HOXC8, ATN1, POU2F1, TCF4, KDM5B, ZNF423, KHDRBS1, KLF12, TBX3, LDB1, S100A11, TRIM27, TP53, ILF3, SMAD2, SNAI2, RBBP7, UBP1, MXD3, HDAC2, YWHAQ, DNMT1, SMURF2, LCOR, NSD1, RBM15, SMARCA4	0.00350498	up
GO:0010629	negative regulation of gene expression	43	MEF2C, EID1, HMGB2, FST, CBX3, ZEB2, ZEB1, REST, CALR, GLI2, PDCD4, CBX5, ZNF174, SRRT, SIN3B, HOXC8, ATN1, POU2F1, TCF4, TNRC6A, KDM5B, ZNF423, KHDRBS1, KLF12, TBX3, LDB1, TRIM27, TP53, SMAD2, ILF3, SNAI2, RBBP7, UBP1, MXD3, TARBP2, HDAC2, YWHAQ, DNMT1, SMURF2, LCOR, NSD1, RBM15, SMARCA4	0.00351521	up
GO:0030900	forebrain development	18	TBX3, HTT, CREB1, NF1, ZEB2, PRKG1, GLI2, NOTCH3, ATRX, NDE1, NOTCH1, FYN, ALDH1A3, MAPK8IP3, MKKS, MYH10, NFIB, SMARCA4	0.00353866	up
GO:0035239	tube morphogenesis	16	TBX3, ZEB2, GLI2, SCRIB, VASP, KDR, EDNRA, SPRY2, NOTCH1, GPC3, CD44, LAMA5, CFL1, MKKS, PBX1, IFT52	0.00356265	up
GO:0001503	ossification	15	BMP1, NF1, SMAD5, TGFB3, COL2A1, IGF2, GLI2, COL5A2, SMO, EXT1, EXT2, EIF2AK3, BMP5, SPP1, CDH11	0.00363244	up
GO:0006974	response to DNA damage stimulus	34	HMGB2, XRCC2, POLA1, TIPIN, RPA1, NONO, FANCL, CASP3, CASP9, PCBP4, CDKN2D, TLK1, GNL1, TOP2A, APEX1, RTEL1, FEN1, POLH, DTL, TP53BP1, PAPD7, TP53, SMC3, ATRX, RFC5, EYA3, CCND1, RFC1, RFC2, SFPQ, POLD2, DGKZ, PARP1, APBB1	0.00376476	up
GO:0051960	regulation of nervous system development	21	XRCC2, PLXNB2, NF1, MAP1B, TP53, REST, GLI2, CALR, TTC3, EPHB2, NOTCH3, SMO, NOTCH1, TULP3, ATN1, CCND2, PBX1, TGIF2, EIF2AK3, DBN1, SPP1	0.00377309	up
GO:0000398	nuclear mRNA splicing, via spliceosome	18	PABPN1, SRPK2, DHX9, CSTF3, TRA2B, PTBP1, HNRNPA2B1, TRA2A, RBM5, RBMX, SF3B4, PRPF6, HNRNPA3, HNRNPD, CPSF7, LSM2, CSTF1, RBM25	0.00378669	up
GO:0000377	RNA splicing, via transesterification reactions with bulged adenosine as nucleophile	18	PABPN1, SRPK2, DHX9, CSTF3, TRA2B, PTBP1, HNRNPA2B1, TRA2A, RBM5, RBMX, SF3B4, PRPF6, HNRNPA3, HNRNPD, CPSF7, LSM2, CSTF1, RBM25	0.00378669	up
GO:0000375	RNA splicing, via transesterification reactions	18	PABPN1, SRPK2, DHX9, CSTF3, TRA2B, PTBP1, HNRNPA2B1, TRA2A, RBM5, RBMX, SF3B4, PRPF6, HNRNPA3, HNRNPD, CPSF7, LSM2, CSTF1, RBM25	0.00378669	up
GO:0050767	regulation of neurogenesis	19	XRCC2, PLXNB2, NF1, MAP1B, TP53, REST, GLI2, CALR, TTC3, EPHB2, NOTCH3, SMO, NOTCH1, ATN1, CCND2, PBX1, TGIF2, DBN1, SPP1	0.00382008	up
GO:0006796	phosphate metabolic process	73	PRPF4B, SLC20A1, FASTK, STK35, TGFB3, FER, LPAR1, PRKG1, LATS1, DMPK, CSNK2A2, S1PR2, AKT1, CDK12, SHC1, PRKACA, TLK1, CDK14, CDK13, CDC7, SRPK2, IKBKAP, INPPL1, STK24, WNK1, PTPRS, CDK6, WEE1, SRPK1, CDK2, PRKD1, EYA3, CCND1, MAST2, PPM1K, MAPK3, CFL1, NEK8, CDK2AP1, CAMK1, CDK11B, NRK, MAPK7, EIF2AK3, EIF2AK4, NEK6, CAMK1D, INPP1, FGFR1, FGFR4, ERBB3, PTPLAD1, STK10, ERBB2, STK17B, EPHB4, EPHB2…	0.00386569	up
GO:0006793	phosphorus metabolic process	73	PRPF4B, SLC20A1, FASTK, STK35, TGFB3, FER, LPAR1, PRKG1, LATS1, DMPK, CSNK2A2, S1PR2, AKT1, CDK12, SHC1, PRKACA, TLK1, CDK14, CDK13, CDC7, SRPK2, IKBKAP, INPPL1, STK24, WNK1, PTPRS, CDK6, WEE1, SRPK1, CDK2, PRKD1, EYA3, CCND1, MAST2, PPM1K, MAPK3, CFL1, NEK8, CDK2AP1, CAMK1, CDK11B, NRK, MAPK7, EIF2AK3, EIF2AK4, NEK6, CAMK1D, INPP1, FGFR1, FGFR4, ERBB3, PTPLAD1, STK10, ERBB2, STK17B, EPHB4, EPHB2…	0.00386569	up
GO:0030198	extracellular matrix organization	14	COL18A1, RECK, ADAMTS20, NF1, OLFML2A, POSTN, COL2A1, COL5A2, EMILIN1, COL12A1, VWA1, APBB1, GFOD2, SMARCA4	0.00396023	up
GO:0043405	regulation of MAP kinase activity	17	HMGCR, PTPLAD1, ERBB2, NF1, TGFB3, ZEB2, LPAR1, PDCD4, SPRY4, S1PR2, SPRY2, SPRY1, PPP2CA, SPRED2, MAPK8IP3, SHC1, SPRED1	0.00397494	up
GO:0051252	regulation of RNA metabolic process	124	MEF2C, SLC2A4RG, FST, RBM5, TGFB3, CBX3, MED22, REST, CBX5, HOXC6, HOXC8, SIN3B, ZFP90, SMARCD1, RARA, PATZ1, IKBKAP, ZNF814, HMG20A, SIX5, ARID1A, ZNF500, SMARCAL1, TGIF2, PIAS1, SMARCA4, EID1, CAMTA2, HMGB2, TSHZ1, ZNF132, TADA3, ZNF133, ZNF131, AFAP1L2, CALR, CXXC1, TCF20, ATN1, SMARCB1, HOXA6, HNRNPD, TCF4, EWSR1, KLF5, DHX9, TAF4, KLF12, TP53BP1, SMAD5, SMAD2, UBP1, NOTCH2, NOTCH1, TULP4, TU…	0.00403964	up
GO:0009991	response to extracellular stimulus	23	ARSB, NES, FADS1, MAP1B, TP53, CLIC1, AKT1, PPP1R9B, TULP4, CCND1, PLA2G4A, CD44, ITGA6, BCHE, CDKN2D, RARA, OGT, DDAH2, IGFBP2, TNRC6A, EIF2AK4, MEST, SPP1	0.0040416	up
GO:0007369	gastrulation	11	MACF1, HTT, LDB1, PRKAR1A, TP53, MKKS, SMAD2, PRKACA, EXT1, NSD1, EXT2	0.00422311	up
GO:0043243	positive regulation of protein complex disassembly	4	CFL1, MGEA5, KATNB1, DSTN	0.00468634	up
GO:0007612	learning	10	AAAS, CHST10, HMGCR, BCHE, HTT, FYN, NF1, APBB1, EPHB2, RIC8A	0.00468639	up
GO:0031667	response to nutrient levels	21	ARSB, NES, FADS1, MAP1B, TP53, CLIC1, AKT1, TULP4, CCND1, PLA2G4A, CD44, BCHE, CDKN2D, RARA, OGT, DDAH2, IGFBP2, TNRC6A, EIF2AK4, MEST, SPP1	0.00503858	up
GO:0006355	regulation of transcription, DNA-dependent	121	MEF2C, SLC2A4RG, FST, TGFB3, CBX3, MED22, REST, CBX5, HOXC6, HOXC8, SIN3B, ZFP90, SMARCD1, RARA, PATZ1, IKBKAP, ZNF814, HMG20A, SIX5, ARID1A, ZNF500, SMARCAL1, TGIF2, PIAS1, SMARCA4, EID1, CAMTA2, HMGB2, TSHZ1, ZNF132, TADA3, ZNF133, ZNF131, AFAP1L2, CALR, CXXC1, TCF20, ATN1, SMARCB1, HOXA6, HNRNPD, TCF4, EWSR1, KLF5, TAF4, KLF12, TP53BP1, SMAD5, SMAD2, UBP1, NOTCH2, NOTCH1, TULP4, TULP3, HDAC2, …	0.00511849	up
GO:0031110	regulation of microtubule polymerization or depolymerization	7	ARHGEF2, MACF1, MAP1A, MAP1B, KATNB1, CLASP1, MAPRE1	0.00566401	up
GO:0008219	cell death	56	MEF2C, FASTK, RBM5, PDCD4, AKT1, CASP3, CASP9, TIAM2, SHARPIN, ATXN10, CDKN2D, TARDBP, SPG20, SPG21, NGFRAP1, ACIN1, DAP, TOP2A, CASP2, RTEL1, LUC7L3, DHCR24, MAGI3, ARHGEF2, DFFA, TP53, ARHGEF17, MGEA5, CDK11B, MAPK7, EIF2AK3, NEK6, TRAF1, BID, ERBB3, STK17B, MMD, SCRIB, PEG10, ATN1, TRAF4, HIP1, CKAP2, ACTC1, HTT, TP53BP2, TRIO, IGF2, REEP1, VAV2, DNASE2, PHF17, ATXN2, SEMA6A, SULF1, APBB1	0.00568962	up
GO:0006275	regulation of DNA replication	10	PPP2CA, S100A11, TGFB3, TIPIN, TP53, IGF2, SHC1, GLI2, CALR, CDK2	0.00584388	up
GO:0043242	negative regulation of protein complex disassembly	8	TRIOBP, ARHGEF2, LIMA1, MAP1A, MAP1B, KATNB1, CLASP1, SPTAN1	0.00592796	up
GO:0010033	response to organic substance	56	ARSB, LDLR, TGFB3, LATS1, ASAH1, EDNRA, AKT1, HSPH1, CASP3, CD44, RARA, GNG2, PRKACA, SHC1, DDAH2, SOCS7, CLIC1, CDO1, TARBP2, CCND1, CCND2, SLC25A36, CFL1, MGEA5, HSPB3, EIF2AK3, EIF2AK4, HMGB2, PANX1, ERBB3, ERBB2, HMGCS1, TTC3, PHIP, SRRT, BCHE, PPP2CA, SPP1, ACTC1, FADS1, CREB1, PTPRA, MAP1B, MSTN, IGF2, MALT1, SMAD2, PLA2G4A, HDAC2, FYN, PRKAR1A, DNAJB1, CHRNB1, PARP1, IGFBP2, TJP2	0.00600374	up
GO:0045892	negative regulation of transcription, DNA-dependent	32	MEF2C, EID1, FST, CBX3, ZEB1, REST, CALR, GLI2, ZNF174, CBX5, SIN3B, HOXC8, ATN1, POU2F1, TCF4, KDM5B, KLF12, TBX3, LDB1, TP53, TRIM27, SMAD2, ILF3, SNAI2, RBBP7, HDAC2, YWHAQ, DNMT1, LCOR, NSD1, RBM15, SMARCA4	0.00612342	up
GO:0007498	mesoderm development	11	MACF1, TBX3, HTT, PPP2CA, PRKAR1A, SMAD2, PRKACA, EXT1, SNAI2, EXT2, MEST	0.00630432	up
GO:0043549	regulation of kinase activity	32	HMGCR, PTPLAD1, ERBB2, TGFB3, ZEB2, LPAR1, LATS1, PDCD4, SPRY4, EDNRA, AKT1, S1PR2, SPRY2, CASP3, SPRY1, CDKN2D, PPP2CA, SPRED2, PRKACA, SHC1, SPRED1, AGK, NF1, MALT1, IGF2, VAV2, TARBP2, CCND1, CCND2, PRKAR1A, DGKZ, MAPK8IP3	0.0063661	up
GO:0007507	heart development	22	NRP2, SRI, ACTC1, TBX3, ERBB3, ERBB2, NF1, SMAD2, COL2A1, GLI2, GJA5, GJC1, EDNRA, SMO, NOTCH1, CASP3, MKKS, IFT52, POFUT1, PCSK5, MYH10, SMARCA4	0.00640383	up
GO:0032535	regulation of cellular component size	26	FGFR1, TRIOBP, LIMA1, SIPA1, TGFB3, LATS1, DSTN, AKT1, DAB2, PPP2CA, CDKN2D, SPP1, CREB1, MAP1B, TP53, IGF2, PHF17, NOTCH2, PPP1R9B, PRDM4, WHSC1L1, CFL1, NOP58, EMP3, APBB1, SPTAN1	0.00647744	up
GO:0016265	death	56	MEF2C, FASTK, RBM5, PDCD4, AKT1, CASP3, CASP9, TIAM2, SHARPIN, ATXN10, CDKN2D, TARDBP, SPG20, SPG21, NGFRAP1, ACIN1, DAP, TOP2A, CASP2, RTEL1, LUC7L3, DHCR24, MAGI3, ARHGEF2, DFFA, TP53, ARHGEF17, MGEA5, CDK11B, MAPK7, EIF2AK3, NEK6, TRAF1, BID, ERBB3, STK17B, MMD, SCRIB, PEG10, ATN1, TRAF4, HIP1, CKAP2, ACTC1, HTT, TP53BP2, TRIO, IGF2, REEP1, VAV2, DNASE2, PHF17, ATXN2, SEMA6A, SULF1, APBB1	0.00656309	up
GO:0060348	bone development	15	BMP1, NF1, SMAD5, TGFB3, COL2A1, IGF2, GLI2, COL5A2, SMO, EXT1, EXT2, EIF2AK3, BMP5, SPP1, CDH11	0.00663012	up
GO:0045596	negative regulation of cell differentiation	22	HMGB3, TBX3, LDB1, NF1, FST, TP53, CDK6, ITGB3, ZEB1, REST, GLI2, CALR, TTC3, EPHB2, NOTCH3, NOTCH2, NOTCH1, CCND1, PBX1, RBM15, HDAC7, SPP1	0.0067449	up
GO:0030324	lung development	13	MAN2A1, SPRY2, FGFR4, NOTCH1, LAMA5, TGFB3, MAPK8IP3, SMAD2, GLI2, ADA, ASAH1, NFIB, KDR	0.00705864	up
GO:0045859	regulation of protein kinase activity	31	HMGCR, PTPLAD1, ERBB2, TGFB3, ZEB2, LPAR1, LATS1, PDCD4, SPRY4, EDNRA, AKT1, S1PR2, SPRY2, CASP3, SPRY1, PPP2CA, CDKN2D, SPRED2, PRKACA, SHC1, SPRED1, AGK, NF1, MALT1, IGF2, TARBP2, CCND1, CCND2, PRKAR1A, DGKZ, MAPK8IP3	0.00706514	up
GO:0035113	embryonic appendage morphogenesis	12	NOTCH2, NOTCH1, TULP3, TBX3, FTO, PRRX1, PBX1, IFT52, FBN2, GJA5, PBX2, SMARCA4	0.00709251	up
GO:0030326	embryonic limb morphogenesis	12	NOTCH2, NOTCH1, TULP3, TBX3, FTO, PRRX1, PBX1, IFT52, FBN2, GJA5, PBX2, SMARCA4	0.00709251	up
GO:0006357	regulation of transcription from RNA polymerase II promoter	56	MEF2C, FST, TGFB3, MED22, ZEB1, GLI2, HOXC6, HOXC8, SMARCD1, IKBKAP, TP53, RBBP7, PRPF6, TARBP2, NCOA1, SMARCAL1, CAND1, LCOR, NSD1, SMARCA4, EID1, HMGB2, CAMTA2, TADA3, ABLIM3, CALR, ZNF174, CHD8, ATN1, SMARCB1, POU2F1, CHD2, MYOG, TCEA2, NFATC2, TCF4, CHD3, TAF4, TBX3, KLF12, CREB1, SMAD5, TRIM27, SMAD2, SNAI2, UBP1, NOTCH1, HDAC2, PRKAR1A, DNMT1, PBX1, PBX2, APBB1, RBM15, TCF12, NFIB	0.00709261	up
GO:0051253	negative regulation of RNA metabolic process	32	MEF2C, EID1, FST, CBX3, ZEB1, REST, CALR, GLI2, ZNF174, CBX5, SIN3B, HOXC8, ATN1, POU2F1, TCF4, KDM5B, KLF12, TBX3, LDB1, TP53, TRIM27, SMAD2, ILF3, SNAI2, RBBP7, HDAC2, YWHAQ, DNMT1, LCOR, NSD1, RBM15, SMARCA4	0.0077435	up
GO:0048754	branching morphogenesis of a tube	10	EDNRA, SPRY2, NOTCH1, GPC3, TBX3, CD44, LAMA5, PBX1, GLI2, KDR	0.0079788	up
GO:0007584	response to nutrient	16	ARSB, FADS1, MAP1B, CLIC1, TULP4, CCND1, PLA2G4A, CD44, BCHE, CDKN2D, RARA, OGT, IGFBP2, DDAH2, SPP1, MEST	0.0087614	up
GO:0051494	negative regulation of cytoskeleton organization	9	TRIOBP, ARHGEF2, LIMA1, MAP1A, MAP1B, KATNB1, CLASP1, MAPRE1, SPTAN1	0.00902714	up
GO:0007242	intracellular signaling cascade	88	RHOJ, WASF2, TGFB3, LPAR1, FER, PRKCSH, LATS1, RFXANK, RGL1, S1PR2, EDNRA, AKT1, PLCB3, TIAM2, PCBP4, SPRED2, RALA, RARA, TLK1, SHC1, PRKACA, GNG2, SPRED1, DDAH2, SHC2, TOP2A, PAG1, AGAP3, DHCR24, SRPK2, RAP2A, IKBKAP, MAGI3, ARHGEF2, RAP2C, DFFA, TP53, WNK1, SOCS7, ARID1A, KIDINS220, UBE2C, SRPK1, ARL3, PRKD1, RND3, SS18, CCND1, NCOA1, CFL1, MAPK3, PIAS1, STMN1, MAPK7, EIF2AK3, FGFR1, HMGB2, ERB…	0.00906755	up
GO:0007026	negative regulation of microtubule depolymerization	5	ARHGEF2, MAP1A, MAP1B, KATNB1, CLASP1	0.00917955	up
GO:0031114	regulation of microtubule depolymerization	5	ARHGEF2, MAP1A, MAP1B, KATNB1, CLASP1	0.00917955	up
GO:0051329	interphase of mitotic cell cycle	13	KHDRBS1, CDC7, POLA1, CDK6, RCC1, LATS1, CDK2, AKT1, CCND1, CCND2, CDKN2D, CDK2AP1, KPNA2	0.00960604	up
GO:0042981	regulation of apoptosis	60	MEF2C, XRCC2, FASTK, RBM5, TGFB3, AKT1, CASP3, CASP9, CD44, TIAM2, PCBP4, CDKN2D, NGFRAP1, DAP, DDAH2, TOP2A, CASP2, RTEL1, DHCR24, ARHGEF2, ADAMTS20, DFFA, ADNP, TP53, ARHGEF17, SMO, IGF2R, CFL1, EIF2AK3, CAMK1D, TRAF1, BID, YWHAZ, ERBB3, ERBB2, STK17B, COL2A1, CALR, SCRIB, ADA, CHD8, PPP2CA, ALDH1A3, TRAF4, HIP1, COL18A1, TBX3, HTT, TP53BP2, CREB1, NF1, TRIO, IGF2, MALT1, VAV2, NOTCH2, PLA2G4A,…	0.0101946	up
GO:0015936	coenzyme A metabolic process	4	PANK2, HMGCR, PANK1, ACLY	0.0103673	up
GO:0007017	microtubule-based process	24	HAUS4, KIF11, HTT, CKAP5, UCHL1, MAP1B, CETN3, UBE2C, PCM1, RCC1, KIF3C, SMC3, SS18, NDE1, MACF1, CEP250, TUBB6, CLASP1, STMN1, HAUS8, TUBA1A, KPNA2, TUBA1C, KIF2A	0.0103719	up
GO:0003002	regionalization	20	TSHZ1, TBX3, HTT, LDB1, ZEB2, SMAD2, GLI2, HOXC6, SMO, HOXC8, NOTCH1, TULP3, MEOX2, HOXA6, PBX1, IFT52, POFUT1, PCSK5, PBX2, MLLT3	0.0104792	up
GO:0048514	blood vessel morphogenesis	21	PLAT, KLF5, COL18A1, NRP2, NF1, WASF2, MMP19, CSPG4, PRRX1, ARHGAP24, UBP1, KDR, GJC1, EDNRA, SMO, NOTCH1, CUL7, MEOX2, LAMA5, POFUT1, SMARCA4	0.0105388	up
GO:0007265	Ras protein signal transduction	13	RHOJ, CDC42EP1, PTPLAD1, NF1, CFL1, WASF2, MAPK3, RALA, SHC1, TAX1BP3, SHC2, RFXANK, DHCR24	0.0111218	up
GO:0010552	positive regulation of specific transcription from RNA polymerase II promoter	9	MEF2C, HMGB2, NOTCH1, HDAC2, SMARCB1, CREB1, TP53, RBM15, SMARCA4	0.0111493	up
GO:0051338	regulation of transferase activity	32	HMGCR, PTPLAD1, ERBB2, TGFB3, ZEB2, LPAR1, LATS1, PDCD4, SPRY4, EDNRA, AKT1, S1PR2, SPRY2, CASP3, SPRY1, CDKN2D, PPP2CA, SPRED2, PRKACA, SHC1, SPRED1, AGK, NF1, MALT1, IGF2, VAV2, TARBP2, CCND1, CCND2, PRKAR1A, DGKZ, MAPK8IP3	0.0112131	up
GO:0022604	regulation of cell morphogenesis	15	RHOJ, PLXNB2, MAP1B, TGFB3, FBLIM1, SMAD2, TTC3, KDR, EPHB2, CDC42EP1, FYN, AKAP2, MYH10, FN1, SPP1	0.0113391	up
GO:0006297	nucleotide-excision repair, DNA gap filling	5	RFC5, RPA1, RFC1, RFC2, POLD2	0.011499	up
GO:0051325	interphase	13	KHDRBS1, CDC7, POLA1, CDK6, RCC1, LATS1, CDK2, AKT1, CCND1, CCND2, CDKN2D, CDK2AP1, KPNA2	0.0119456	up
GO:0043067	regulation of programmed cell death	60	MEF2C, XRCC2, FASTK, RBM5, TGFB3, AKT1, CASP3, CASP9, CD44, TIAM2, PCBP4, CDKN2D, NGFRAP1, DAP, DDAH2, TOP2A, CASP2, RTEL1, DHCR24, ARHGEF2, ADAMTS20, DFFA, ADNP, TP53, ARHGEF17, SMO, IGF2R, CFL1, EIF2AK3, CAMK1D, TRAF1, BID, YWHAZ, ERBB3, ERBB2, STK17B, COL2A1, CALR, SCRIB, ADA, CHD8, PPP2CA, ALDH1A3, TRAF4, HIP1, COL18A1, TBX3, HTT, TP53BP2, CREB1, NF1, TRIO, IGF2, MALT1, VAV2, NOTCH2, PLA2G4A,…	0.0120806	up
GO:0007155	cell adhesion	53	NRP2, MTSS1, AEBP1, PCDHGA7, POSTN, FER, MEGF10, SDC3, PNN, PCDH1, SRPX, CD44, CHST10, COL12A1, MSN, LOXL2, BOC, MAGI1, INPPL1, PTPRS, FBLIM1, CTNNA1, SIRPA, JUP, RND3, VCAN, SGCE, CTNND1, COL2A1, ITGB3, DCHS1, SCRIB, ISLR, RGMB, COL6A6, PVRL3, THBS2, THBS3, FN1, SPP1, COL18A1, BMP1, COL16A1, MCAM, EMILIN2, RAPH1, EMILIN1, PCDH18, LAMA4, ITGA6, LAMA5, CDON, CDH11	0.0121932	up
GO:0022610	biological adhesion	53	NRP2, MTSS1, AEBP1, PCDHGA7, POSTN, FER, MEGF10, SDC3, PNN, PCDH1, SRPX, CD44, CHST10, COL12A1, MSN, LOXL2, BOC, MAGI1, INPPL1, PTPRS, FBLIM1, CTNNA1, SIRPA, JUP, RND3, VCAN, SGCE, CTNND1, COL2A1, ITGB3, DCHS1, SCRIB, ISLR, RGMB, COL6A6, PVRL3, THBS2, THBS3, FN1, SPP1, COL18A1, BMP1, COL16A1, MCAM, EMILIN2, RAPH1, EMILIN1, PCDH18, LAMA4, ITGA6, LAMA5, CDON, CDH11	0.0125341	up
GO:0045597	positive regulation of cell differentiation	22	SH3PXD2B, XRCC2, ADAMTS20, PLXNB2, MAP1B, SMAD5, TGFB3, CD276, IGF2, SMAD2, GLI2, ADA, EPHB2, AKT1, SMO, NOTCH1, CAMK1, RARA, TGIF2, ACIN1, BOC, FNDC3B	0.0126927	up
GO:0010639	negative regulation of organelle organization	11	TRIOBP, ARHGEF2, LIMA1, MAD2L1, MAP1A, MAP1B, KATNB1, DNMT1, CLASP1, MAPRE1, SPTAN1	0.0127763	up
GO:0045664	regulation of neuron differentiation	15	PLXNB2, MAP1B, REST, GLI2, CALR, TTC3, EPHB2, NOTCH3, NOTCH1, ATN1, CCND2, TGIF2, PBX1, DBN1, SPP1	0.012849	up
GO:0010941	regulation of cell death	60	MEF2C, XRCC2, FASTK, RBM5, TGFB3, AKT1, CASP3, CASP9, CD44, TIAM2, PCBP4, CDKN2D, NGFRAP1, DAP, DDAH2, TOP2A, CASP2, RTEL1, DHCR24, ARHGEF2, ADAMTS20, DFFA, ADNP, TP53, ARHGEF17, SMO, IGF2R, CFL1, EIF2AK3, CAMK1D, TRAF1, BID, YWHAZ, ERBB3, ERBB2, STK17B, COL2A1, CALR, SCRIB, ADA, CHD8, PPP2CA, ALDH1A3, TRAF4, HIP1, COL18A1, TBX3, HTT, TP53BP2, CREB1, NF1, TRIO, IGF2, MALT1, VAV2, NOTCH2, PLA2G4A,…	0.0130676	up
GO:0000226	microtubule cytoskeleton organization	16	HAUS4, KIF11, CKAP5, MAP1B, CETN3, UBE2C, PCM1, RCC1, SMC3, SS18, NDE1, MACF1, CEP250, CLASP1, HAUS8, STMN1	0.0133922	up
GO:0009411	response to UV	9	AKT1, CCND1, CASP3, CASP9, POLH, CDKN2D, TP53, SCARA3, FEN1	0.0136187	up
GO:0030031	cell projection assembly	11	KLF5, MTSS1, ITGA6, LAMA5, WASF2, MKKS, MTSS1L, LPAR1, VAV2, PCM1, MYH10	0.0138463	up
GO:0051493	regulation of cytoskeleton organization	15	TRIOBP, XPO1, ARHGEF2, LIMA1, MAP1A, MAP1B, KATNB1, LATS1, DSTN, MACF1, CEP250, CFL1, CLASP1, MAPRE1, SPTAN1	0.0154005	up
GO:0048332	mesoderm morphogenesis	7	MACF1, TBX3, HTT, PRKAR1A, SMAD2, PRKACA, EXT2	0.0154271	up
GO:0045926	negative regulation of growth	13	SIPA1, TP53, MSTN, ATXN2, PHF17, PPP1R9B, DAB2, GPC3, PRDM4, PPP2CA, CDKN2D, APBB1, SPP1	0.0157177	up
GO:0051094	positive regulation of developmental process	25	XRCC2, FST, TGFB3, GLI2, ADA, EPHB2, AKT1, RARA, ACIN1, BOC, FNDC3B, SH3PXD2B, ADAMTS20, PLXNB2, SMAD5, MAP1B, CD276, SMAD2, IGF2, SMO, PLA2G4A, NOTCH1, CAMK1, TGIF2, HDAC7	0.0161437	up
GO:0008361	regulation of cell size	20	FGFR1, CREB1, SIPA1, MAP1B, TP53, TGFB3, IGF2, AKT1, PPP1R9B, NOTCH2, PHF17, DAB2, PRDM4, PPP2CA, CDKN2D, WHSC1L1, NOP58, EMP3, APBB1, SPP1	0.0162619	up
GO:0009628	response to abiotic stimulus	31	ARSB, XRCC2, HMGCR, AKT1, CASP3, CASP9, CDKN2D, MKKS, FEN1, COL18A1, DHX9, NES, POLH, HTT, NF1, MAP1B, TP53, MSTN, SNAI2, RIC8A, EYA3, CCND1, PLA2G4A, HDAC2, ARRB1, FYN, CIRBP, SCARA3, HSPB3, IGFBP2, APBB1	0.0164773	up
GO:0009416	response to light stimulus	15	POLH, HMGCR, HTT, NF1, TP53, RIC8A, AKT1, CCND1, CASP3, CASP9, ARRB1, CDKN2D, SCARA3, APBB1, FEN1	0.0173061	up
GO:0045893	positive regulation of transcription, DNA-dependent	38	MEF2C, HMGB2, CAMTA2, ABLIM3, TGFB3, AFAP1L2, ZEB1, GLI2, CHD8, SMARCB1, SMARCD1, POU2F1, MYOG, TCF4, NFATC2, KLF12, TBX3, CREB1, TP53BP1, SMAD5, TP53, ILF3, SMAD2, CREB5, ARID1A, PRPF6, NOTCH1, NCOA1, HDAC2, PBX1, CAND1, PIAS1, APBB1, NSD1, PBX2, RBM15, NFIB, SMARCA4	0.017378	up
GO:0001763	morphogenesis of a branching structure	10	EDNRA, SPRY2, NOTCH1, GPC3, TBX3, CD44, LAMA5, PBX1, GLI2, KDR	0.0179807	up
GO:0000902	cell morphogenesis	30	NRP2, ERBB3, ERBB2, UCHL1, GLI2, SCRIB, EPHB2, NDE1, DAB2, MACF1, MKKS, CLASP1, FN1, ACTB, COL18A1, ARHGEF2, CREB1, MAP1B, PCM1, VASP, SS18, SEMA6A, SMO, NOTCH1, LAMA5, CFL1, MAPK8IP3, VCAN, APBB1, MYH10	0.0183669	up
GO:0042278	purine nucleoside metabolic process	6	PANK2, PRTFDC1, HMGCR, PANK1, ACLY, ADA	0.0184249	up
GO:0046128	purine ribonucleoside metabolic process	6	PANK2, PRTFDC1, HMGCR, PANK1, ACLY, ADA	0.0184249	up
GO:0031571	G1 DNA damage checkpoint	4	CCND1, PCBP4, TP53, DGKZ	0.0187801	up
GO:0043193	positive regulation of gene-specific transcription	11	MEF2C, HMGB2, NOTCH1, HDAC2, SMARCB1, CREB1, TGFB3, TP53, SMAD2, RBM15, SMARCA4	0.0188058	up
GO:0051130	positive regulation of cellular component organization	18	PLXNB2, MAP1B, KATNB1, TGFB3, IGF2, SMAD2, CALR, DSTN, AKT1, PLA2G4A, CDC42EP1, GSK3B, CFL1, MGEA5, DNMT1, RALA, CAND1, HIP1	0.0189411	up
GO:0007167	enzyme linked receptor protein signaling pathway	29	FGFR1, MTSS1, MPZL1, FGFR4, ERBB3, ERBB2, FST, TGFB3, FSTL1, EPHB4, EPHB2, PHIP, AKT1, RGMB, SHC1, PLAT, NIN, CREB1, PTPRA, SMAD5, SOCS7, MSTN, TRIO, IGF2, SMAD2, KDR, SS18, SMURF2, EIF2AK3	0.0190681	up
GO:0009952	anterior/posterior pattern formation	15	TSHZ1, TBX3, HTT, LDB1, ZEB2, SMAD2, HOXC6, NOTCH1, HOXC8, MEOX2, HOXA6, PBX1, POFUT1, PCSK5, MLLT3	0.0193863	up
GO:0051254	positive regulation of RNA metabolic process	38	MEF2C, HMGB2, CAMTA2, ABLIM3, TGFB3, AFAP1L2, ZEB1, GLI2, CHD8, SMARCB1, SMARCD1, POU2F1, MYOG, TCF4, NFATC2, KLF12, TBX3, CREB1, TP53BP1, SMAD5, TP53, ILF3, SMAD2, CREB5, ARID1A, PRPF6, NOTCH1, NCOA1, HDAC2, PBX1, CAND1, PIAS1, APBB1, NSD1, PBX2, RBM15, NFIB, SMARCA4	0.0195689	up
GO:0033261	regulation of S phase	5	CDC7, TIPIN, RCC1, APBB1, SMARCA4	0.020588	up
GO:0031175	neuron projection development	23	ACTB, NRP2, FGFR1, ERBB3, CREB1, ERBB2, MAP1B, UCHL1, GLI2, PRKG1, VASP, EPHB2, PPP1R9B, SMO, SEMA6A, NOTCH1, MACF1, CD44, ATXN10, MAPK8IP3, VCAN, APBB1, MYH10	0.0211499	up
GO:0030705	cytoskeleton-dependent intracellular transport	8	NDE1, ACTC1, MACF1, HTT, MYH3, WASF2, UCHL1, MYH10	0.0211742	up
GO:0012501	programmed cell death	46	TRAF1, MEF2C, BID, ERBB3, FASTK, RBM5, STK17B, PDCD4, SCRIB, AKT1, CASP3, PEG10, CASP9, TIAM2, SHARPIN, CDKN2D, NGFRAP1, ACIN1, DAP, CASP2, TOP2A, TRAF4, LUC7L3, RTEL1, HIP1, DHCR24, CKAP2, MAGI3, ARHGEF2, ACTC1, HTT, TP53BP2, DFFA, TP53, TRIO, ARHGEF17, VAV2, DNASE2, SEMA6A, PHF17, SULF1, CDK11B, MAPK7, APBB1, EIF2AK3, NEK6	0.0216144	up
GO:0006913	nucleocytoplasmic transport	16	PABPN1, XPO1, SMG6, HTT, TP53, TGFB3, MALT1, CALR, AKT1, AAAS, GSK3B, CAMK1, NOP58, KPNA2, TNPO1, RERE	0.021909	up
GO:0034329	cell junction assembly	7	ITGA6, LAMA5, ITGB3, CTNNA1, GJA5, FN1, GJC1	0.0219297	up
GO:0007050	cell cycle arrest	12	KHDRBS1, PPP1R9B, NOTCH2, MACF1, PCBP4, CDKN2D, TP53, CALR, APBB1, VASH1, DHCR24, SESN3	0.023318	up
GO:0009314	response to radiation	19	NES, XRCC2, POLH, HMGCR, HTT, NF1, TP53, SNAI2, RIC8A, AKT1, EYA3, CCND1, CASP3, CASP9, ARRB1, CDKN2D, SCARA3, APBB1, FEN1	0.0236858	up
GO:0051169	nuclear transport	16	PABPN1, XPO1, SMG6, HTT, TP53, TGFB3, MALT1, CALR, AKT1, AAAS, GSK3B, CAMK1, NOP58, KPNA2, TNPO1, RERE	0.0242599	up
GO:0033189	response to vitamin A	7	CD44, FADS1, CDKN2D, MAP1B, RARA, IGFBP2, MEST	0.0244531	up
GO:0007264	small GTPase mediated signal transduction	26	RHOJ, RAP2A, RAB2B, RAB8B, RAP2C, PTPLAD1, NF1, WASF2, VAV2, TAX1BP3, RFXANK, RGL1, ARL3, RND3, CDC42EP1, MAPK3, RAB22A, RAB34, CFL1, YWHAQ, RALA, SHC1, RIT1, SHC2, AGAP3, DHCR24	0.025393	up
GO:0008360	regulation of cell shape	8	RHOJ, CDC42EP1, FYN, FBLIM1, AKAP2, MYH10, KDR, FN1	0.0255628	up
GO:0006915	apoptosis	45	TRAF1, MEF2C, BID, ERBB3, FASTK, RBM5, STK17B, PDCD4, SCRIB, AKT1, CASP3, PEG10, CASP9, TIAM2, SHARPIN, NGFRAP1, ACIN1, DAP, CASP2, TOP2A, TRAF4, LUC7L3, RTEL1, HIP1, DHCR24, CKAP2, MAGI3, ARHGEF2, ACTC1, HTT, TP53BP2, DFFA, TP53, TRIO, ARHGEF17, VAV2, DNASE2, SEMA6A, PHF17, SULF1, CDK11B, MAPK7, APBB1, EIF2AK3, NEK6	0.025686	up
GO:0009100	glycoprotein metabolic process	19	OSTC, B3GALT2, LDLR, NDST2, COL2A1, B3GNT9, MAN2A1, ADAMTS9, GALNT10, COG7, ST8SIA4, SULF1, CHST14, MGEA5, OGT, EXT1, POFUT1, EXT2, DHCR24	0.0258629	up
GO:0051642	centrosome localization	3	SEMA6A, NIN, PLXNA2	0.0262105	up
GO:0009725	response to hormone stimulus	30	ARSB, HMGB2, LDLR, ERBB3, ERBB2, TGFB3, LATS1, AKT1, PHIP, BCHE, RARA, SHC1, PRKACA, GNG2, SPP1, FADS1, PTPRA, MAP1B, SOCS7, MSTN, IGF2, CDO1, CCND1, PLA2G4A, CCND2, SLC25A36, PRKAR1A, MGEA5, PARP1, IGFBP2	0.0262286	up
GO:0060021	palate development	6	TSHZ1, MEOX2, PRRX1, TGFB3, SMAD2, COL2A1	0.0273679	up
GO:0043086	negative regulation of catalytic activity	24	FZR1, GNAI3, HMGCR, NF1, TP53, IGF2, CDC20, UBE2C, LATS1, PDCD4, SPRY4, AKT1, TARBP2, SPRY2, CASP3, SPRY1, MAD2L1, CDKN2D, PSMD10, PPP2CA, SPRED2, CAND1, SPRED1, DHCR24	0.0274835	up
GO:0060562	epithelial tube morphogenesis	9	GPC3, CD44, LAMA5, CFL1, ZEB2, PBX1, IFT52, VASP, SCRIB	0.0275452	up
GO:0032870	cellular response to hormone stimulus	14	ERBB3, PTPRA, SOCS7, IGF2, LATS1, PHIP, AKT1, CCND2, PRKAR1A, SHC1, PRKACA, GNG2, IGFBP2, PARP1	0.0279601	up
GO:0016055	Wnt receptor signaling pathway	14	FZD9, LDB1, TLE3, CTNND1, TAX1BP3, CSNK2A2, DKK3, CCND1, CHD8, MACF1, INVS, GSK3B, HMGXB4, KREMEN1	0.0279601	up
GO:0043066	negative regulation of apoptosis	29	MEF2C, YWHAZ, XRCC2, ERBB3, ERBB2, TGFB3, COL2A1, ADA, AKT1, CASP3, CHD8, CDKN2D, DDAH2, CASP2, RTEL1, DHCR24, TBX3, HTT, DFFA, ADAMTS20, ADNP, TP53, MALT1, IGF2, NOTCH2, SMO, NOTCH1, GSK3B, CFL1	0.0283581	up
GO:0048286	lung alveolus development	5	MAN2A1, TGFB3, MAPK8IP3, ADA, KDR	0.0285471	up
GO:0001701	in utero embryonic development	17	XRCC2, TBX3, NASP, TP53, TGFB3, SMAD2, ADA, RIC8A, EDNRA, RPA1, MAN2A1, DAB2, CHD8, TULP3, MAPK8IP3, MYH10, SMARCA4	0.0292131	up
GO:0032869	cellular response to insulin stimulus	9	PHIP, AKT1, CCND2, ERBB3, PTPRA, SOCS7, IGF2, SHC1, PARP1	0.0297965	up
GO:0042060	wound healing	18	PLAT, GGCX, HPS5, ERBB3, EFEMP2, ERBB2, NF1, TGFB3, MSTN, IGF2, ITGB3, DTNBP1, NOTCH3, NOTCH2, NOTCH1, CD44, MYH10, FN1	0.0300455	up
GO:0040008	regulation of growth	28	ING2, SIPA1, AKT1, DAB2, GPC3, CD44, PPP2CA, CDKN2D, SHC1, SPP1, CREB1, MAP1B, TP53, SOCS7, MSTN, TKT, IGF2, PPP1R9B, ATXN2, PHF17, UBE2E3, PRDM4, GAMT, CDK11B, PARP1, IGFBP2, APBB1, IGFBP4	0.0306213	up
GO:0014033	neural crest cell differentiation	6	NRP2, EDNRA, SMO, LAMA5, CFL1, ZEB2	0.0308667	up
GO:0045665	negative regulation of neuron differentiation	6	NOTCH3, NOTCH1, PBX1, REST, CALR, TTC3	0.0308667	up
GO:0014032	neural crest cell development	6	NRP2, EDNRA, SMO, LAMA5, CFL1, ZEB2	0.0308667	up
GO:0043062	extracellular structure organization	16	RECK, COL18A1, ADAMTS20, ERBB2, NF1, MAP1B, OLFML2A, POSTN, COL2A1, COL5A2, EMILIN1, COL12A1, VWA1, APBB1, GFOD2, SMARCA4	0.0309585	up
GO:0009719	response to endogenous stimulus	32	ARSB, HMGB2, LDLR, ERBB3, ERBB2, HMGCS1, TGFB3, LATS1, AKT1, PHIP, BCHE, RARA, PRKACA, SHC1, GNG2, SPP1, FADS1, PTPRA, MAP1B, SOCS7, MSTN, IGF2, CDO1, CCND1, PLA2G4A, CCND2, SLC25A36, CFL1, PRKAR1A, MGEA5, PARP1, IGFBP2	0.0323549	up
GO:0043069	negative regulation of programmed cell death	29	MEF2C, YWHAZ, XRCC2, ERBB3, ERBB2, TGFB3, COL2A1, ADA, AKT1, CASP3, CHD8, CDKN2D, DDAH2, CASP2, RTEL1, DHCR24, TBX3, HTT, DFFA, ADAMTS20, ADNP, TP53, MALT1, IGF2, NOTCH2, SMO, NOTCH1, GSK3B, CFL1	0.0331064	up
GO:0001755	neural crest cell migration	5	NRP2, SMO, LAMA5, CFL1, ZEB2	0.0331218	up
GO:0007051	spindle organization	7	HAUS4, KIF11, HAUS8, STMN1, RCC1, UBE2C, SMC3	0.0331625	up
GO:0034330	cell junction organization	8	ITGA6, LAMA5, TGFB3, ITGB3, CTNNA1, GJA5, FN1, GJC1	0.0332494	up
GO:0060548	negative regulation of cell death	29	MEF2C, YWHAZ, XRCC2, ERBB3, ERBB2, TGFB3, COL2A1, ADA, AKT1, CASP3, CHD8, CDKN2D, DDAH2, CASP2, RTEL1, DHCR24, TBX3, HTT, DFFA, ADAMTS20, ADNP, TP53, MALT1, IGF2, NOTCH2, SMO, NOTCH1, GSK3B, CFL1	0.0341757	up
GO:0034976	response to endoplasmic reticulum stress	6	CCND1, GSK3B, TP53, FAM129A, EIF2AK3, EIF2AK4	0.0346337	up
GO:0006281	DNA repair	24	HMGB2, XRCC2, POLH, TP53BP1, PAPD7, TP53, POLA1, SMC3, NONO, RPA1, ATRX, RFC5, EYA3, FANCL, RFC1, RFC2, CDKN2D, SFPQ, POLD2, PARP1, TOP2A, APEX1, FEN1, RTEL1	0.0350508	up
GO:0007568	aging	12	PLA2G4A, TBX3, HTT, FADS1, TGFB3, MGEA5, TP53, LOXL2, CALR, IGFBP2, PDCD4, ADA	0.0356317	up
GO:0016331	morphogenesis of embryonic epithelium	8	HTT, LAMA5, ALDH1A3, CFL1, ZEB2, IFT52, GLI2, VASP	0.0361195	up
GO:0009119	ribonucleoside metabolic process	7	PANK2, PRTFDC1, HMGCR, PANK1, ACLY, ENTPD4, ADA	0.0364595	up
GO:0030111	regulation of Wnt receptor signaling pathway	7	DKK3, CCND1, CHD8, HMGXB4, PPP2CA, ZEB2, TAX1BP3	0.0364595	up
GO:0006268	DNA unwinding during replication	4	HMGB2, TOP3A, MCM4, MCM6	0.036725	up
GO:0030201	heparan sulfate proteoglycan metabolic process	4	NDST2, SULF1, EXT1, EXT2	0.036725	up
GO:0007517	muscle organ development	19	MEF2C, SRI, AEBP1, ACTC1, ERBB3, ERBB2, MYH3, NF1, MSTN, TAGLN3, GJC1, SMTN, MEOX2, LAMA5, CHRND, MYOG, SGCE, TCF12, MYH10	0.0375675	up
GO:0001839	neural plate morphogenesis	3	HTT, CFL1, GLI2	0.037921	up
GO:0060443	mammary gland morphogenesis	3	ERBB3, ERBB2, SCRIB	0.037921	up
GO:0045600	positive regulation of fat cell differentiation	3	SH3PXD2B, AKT1, FNDC3B	0.037921	up
GO:0044092	negative regulation of molecular function	27	FZR1, GNAI3, HMGCR, LATS1, PDCD4, SPRY4, AKT1, SPRY2, CASP3, SPRY1, PPP2CA, CDKN2D, SPRED2, SPRED1, DHCR24, NF1, TP53, CDC20, IGF2, UBE2C, TARBP2, SMO, HDAC2, MAD2L1, PSMD10, CAND1, PBX1	0.0397972	up
GO:0046777	protein amino acid autophosphorylation	10	AKT1, FYN, ERBB2, TAOK3, CDK12, PRKACA, MAPK7, FER, YES1, EIF2AK3	0.0398713	up
GO:0007015	actin filament organization	9	PPP1R9B, ARHGEF2, PPP1R9A, ACTC1, LIMA1, CFL1, EVL, DBN1, DSTN	0.0400599	up
GO:0016569	covalent chromatin modification	13	TADA3, TADA2A, EYA3, PHF17, HDAC2, WHSC1L1, PRDM5, LEO1, USP22, PAF1, NSD1, APBB1, SMARCA4	0.0401528	up
GO:0032989	cellular component morphogenesis	31	NRP2, ERBB3, ERBB2, UCHL1, GLI2, SCRIB, EPHB2, NDE1, DAB2, MACF1, MKKS, CLASP1, FN1, ACTB, COL18A1, ARHGEF2, ACTC1, CREB1, MAP1B, PCM1, VASP, SMO, SS18, SEMA6A, NOTCH1, LAMA5, CFL1, MAPK8IP3, VCAN, APBB1, MYH10	0.040397	up
GO:0042127	regulation of cell proliferation	55	RBM5, TGFB3, PRRX1, ZEB1, GLI2, EDNRA, S1PR2, CASP3, GPC3, CDKN2D, SHC1, CDK13, DHCR24, CDC7, ARHGEF2, TP53, SIX5, CDK6, VASH1, CDK2, SMO, CCND1, CCND2, EMP3, FGFR1, FGFR4, ERBB3, ERBB2, TIPIN, CNTFR, CALR, ADA, RPA1, COL18A1, KLF5, TP53I11, TBX3, NF1, S100A11, CD276, ROGDI, IGF2, SMAD2, TAX1BP3, KDR, PPP1R9B, NOTCH2, NOTCH1, PLA2G4A, LEPRE1, HDAC2, LAMA5, PBX1, MAB21L1, NFIB	0.0409383	up
GO:0045792	negative regulation of cell size	11	AKT1, PPP1R9B, PHF17, DAB2, PRDM4, CDKN2D, PPP2CA, SIPA1, TP53, APBB1, SPP1	0.0413733	up
GO:0043065	positive regulation of apoptosis	33	BID, FASTK, RBM5, TGFB3, STK17B, SCRIB, AKT1, CASP3, CD44, TIAM2, CASP9, PCBP4, ALDH1A3, PPP2CA, NGFRAP1, DAP, TOP2A, CASP2, HIP1, COL18A1, ARHGEF2, HTT, TP53BP2, DFFA, NF1, TP53, ARHGEF17, TRIO, VAV2, NOTCH2, NOTCH1, PLA2G4A, APBB1	0.0419791	up
GO:0000904	cell morphogenesis involved in differentiation	21	ACTB, COL18A1, NRP2, ERBB3, CREB1, ERBB2, MAP1B, UCHL1, GLI2, VASP, EPHB2, SEMA6A, DAB2, NOTCH1, MACF1, LAMA5, MAPK8IP3, VCAN, APBB1, MYH10, FN1	0.0422488	up
GO:0006333	chromatin assembly or disassembly	13	HMGB2, ARID4B, CBX3, CBX1, TSPYL4, TSPYL5, CBX5, CHD9, CHD8, CHD2, HIRIP3, CHD6, CHD3	0.0422615	up
GO:0007423	sensory organ development	20	DFNA5, TSHZ1, ERBB3, ERBB2, NF1, PRRX1, TGFB3, SIX5, COL2A1, ZEB1, COL5A2, EPHB2, SPRY2, TULP3, ALDH1A3, PVRL3, POU2F1, TGIF2, MAB21L1, MYH10	0.0423073	up
GO:0001707	mesoderm formation	6	MACF1, HTT, PRKAR1A, SMAD2, PRKACA, EXT2	0.0429876	up
GO:0046907	intracellular transport	47	ARSB, BID, XPO1, YWHAZ, SEC31A, SNX15, AP1G1, WASF2, UCHL1, USE1, TGFB3, KATNB1, AKAP12, CALR, DTNBP1, AKT1, NDE1, MACF1, HMGXB4, MKKS, TLK1, APPBP2, TNPO1, AGAP3, PABPN1, STX6, ARHGEF2, ACTC1, SMG6, HTT, MYH3, TP53, MALT1, ERGIC1, AAAS, COG7, ARRB1, GSK3B, YWHAQ, MGEA5, NOP58, CAMK1, SH3D19, KPNA2, GGA2, RERE, MYH10	0.0430002	up
GO:0030261	chromosome condensation	5	NCAPH, PAPD7, ACIN1, TOP2A, NCAPD2	0.0434807	up
GO:0045862	positive regulation of proteolysis	5	AKT1, HDAC2, MGEA5, IFT52, SH3D19	0.0434807	up
GO:0048858	cell projection morphogenesis	21	ACTB, NRP2, ERBB3, CREB1, ERBB2, UCHL1, MAP1B, GLI2, PCM1, VASP, EPHB2, SMO, SEMA6A, NOTCH1, MACF1, LAMA5, MAPK8IP3, MKKS, VCAN, APBB1, MYH10	0.0438164	up
GO:0051129	negative regulation of cellular component organization	14	TRIOBP, ARHGEF2, LIMA1, MAP1A, MAP1B, KATNB1, TTC3, EPHB2, MAD2L1, DNMT1, CLASP1, MAPRE1, SPP1, SPTAN1	0.0440611	up
GO:0007052	mitotic spindle organization	4	KIF11, STMN1, RCC1, SMC3	0.0441093	up
GO:0043068	positive regulation of programmed cell death	33	BID, FASTK, RBM5, TGFB3, STK17B, SCRIB, AKT1, CASP3, CD44, TIAM2, CASP9, PCBP4, ALDH1A3, PPP2CA, NGFRAP1, DAP, TOP2A, CASP2, HIP1, COL18A1, ARHGEF2, HTT, TP53BP2, DFFA, NF1, TP53, ARHGEF17, TRIO, VAV2, NOTCH2, NOTCH1, PLA2G4A, APBB1	0.0455183	up
GO:0042493	response to drug	19	COL18A1, YWHAZ, ACTC1, NES, ERBB3, CREB1, ERBB2, HIAT1, MAP1B, HMGCS1, PAPD7, TP53, ATP1A1, SS18, CCND1, HDAC2, BCHE, ALDH1A3, IGFBP2	0.045541	up
GO:0006790	sulfur metabolic process	12	MTHFR, NDST2, UST, SULF1, CHST2, CHST14, ENOPH1, PAPSS1, EXT1, CDO1, EXT2, CHST1	0.0468369	up
GO:0010942	positive regulation of cell death	33	BID, FASTK, RBM5, TGFB3, STK17B, SCRIB, AKT1, CASP3, CD44, TIAM2, CASP9, PCBP4, ALDH1A3, PPP2CA, NGFRAP1, DAP, TOP2A, CASP2, HIP1, COL18A1, ARHGEF2, HTT, TP53BP2, DFFA, NF1, TP53, ARHGEF17, TRIO, VAV2, NOTCH2, NOTCH1, PLA2G4A, APBB1	0.0475107	up
GO:0008286	insulin receptor signaling pathway	6	PHIP, AKT1, PTPRA, SOCS7, IGF2, SHC1	0.0475801	up
GO:0001667	ameboidal cell migration	6	NRP2, SMO, LAMA5, WASF2, CFL1, ZEB2	0.0475801	up
GO:0008283	cell proliferation	33	ERBB2, SIPA1, UCHL1, FST, POLA1, ZEB2, ZEB1, TXLNA, GLI2, EPHB4, SCRIB, EDNRA, SRRT, DAB2, NDE1, GNG2, KHDRBS1, FZD9, MKI67, NASP, TRIM27, CD276, TP53, MALT1, RBBP7, PRKD1, PRDM4, FYN, LAMA5, CDK11B, MAPRE1, IGFBP4, MYH10	0.0488331	up
GO:0030262	apoptotic nuclear changes	5	CASP3, DFFA, SHARPIN, ACIN1, TOP2A	0.0492665	up
GO:0006695	cholesterol biosynthetic process	5	TM7SF2, HMGCR, HMGCS1, IDI1, DHCR24	0.0492665	up

## Sheet: E105 vs B3
Table S8-6 Significantly enriched Gene ontology (GO) biological processes for the targets of DE miRNAs between E105 and B3.
GO ID	GO Terms	Gene number	Genes	p-value*	change direction(DE miRNAs)
GO:0001944	vasculature development	55	NRP2, LMO2, WASF2, CSPG4, PRRX1, FOXO1, JAG1, ENPEP, PRRX2, PTEN, GJA5, MMP2, EDNRA, CUL7, CD44, CXCR4, ROBO4, SEMA3C, LOX, NR2F2, ANGPT2, RECK, MMP19, ARHGAP24, SMO, BGN, ZFAND5, ELK3, CDH5, GJC1, PTK2, ITGAV, PLCD1, THBS1, RASA1, PLAT, KLF5, TBX3, SPHK2, VHL, SMAD7, NF1, UBP1, ANXA2, KDR, GPI, NOTCH1, LAMA4, MEOX2, ID1, LAMA5, NTRK2, POFUT1, ENG, PLAU	7.27441e-12	down
GO:0001568	blood vessel development	54	NRP2, LMO2, WASF2, CSPG4, PRRX1, FOXO1, JAG1, ENPEP, PRRX2, PTEN, GJA5, MMP2, EDNRA, CUL7, CD44, CXCR4, ROBO4, SEMA3C, LOX, NR2F2, ANGPT2, RECK, MMP19, ARHGAP24, SMO, BGN, ELK3, CDH5, GJC1, PTK2, ITGAV, PLCD1, THBS1, RASA1, PLAT, KLF5, TBX3, SPHK2, VHL, SMAD7, NF1, UBP1, ANXA2, KDR, GPI, NOTCH1, LAMA4, MEOX2, ID1, LAMA5, NTRK2, POFUT1, ENG, PLAU	9.13033e-12	down
GO:0030036	actin cytoskeleton organization	46	RHOJ, TRIOBP, MTSS1, LIMA1, PDGFB, CNN3, PREX1, CALD1, BCAR1, SSH2, WASF2, PDLIM3, ARF6, MYO9B, CYTH2, ARPC5, DAAM1, CALR, DSTN, RALA, BCL6, CAP1, EHD2, ARHGEF2, ACTA1, TAOK2, NF1, PRKCI, ARHGEF17, EVL, MYOZ1, TMSB10, LPIN1, FLNB, GAS7, VASP, EPB41L2, RND3, PPP1R9A, CDC42BPG, XIRP1, CFL1, SCIN, WASL, TMOD1, MYH10	5.53653e-09	down
GO:0030029	actin filament-based process	47	RHOJ, TRIOBP, MTSS1, LIMA1, PDGFB, CNN3, PREX1, CALD1, BCAR1, SSH2, WASF2, PDLIM3, ARF6, MYO9B, CYTH2, ARPC5, DAAM1, CALR, DSTN, RALA, BCL6, CAP1, EHD2, ARHGEF2, ACTA1, TAOK2, MYH3, NF1, PRKCI, ARHGEF17, EVL, MYOZ1, TMSB10, LPIN1, FLNB, GAS7, VASP, EPB41L2, RND3, PPP1R9A, CDC42BPG, XIRP1, CFL1, SCIN, WASL, TMOD1, MYH10	1.49834e-08	down
GO:0007010	cytoskeleton organization	69	RHOJ, MTSS1, LIMA1, PDGFB, PREX1, BCAR1, WASF2, PDLIM3, TTL, DSTN, NDE1, CEP250, RALA, CAP1, ARHGEF2, KIF11, ACTA1, PRKCI, ARHGEF17, TMSB10, PCM1, LPIN1, FLNB, VASP, EPB41L2, RND3, SS18, BBS2, XIRP1, SCIN, CFL1, STMN1, HAUS8, WASL, TRIOBP, CNN3, ABLIM3, CALD1, SSH2, CETN3, MYO9B, CYTH2, ARF6, ARPC5, DAAM1, RCC1, CALR, PTK2, MACF1, KATNA1, BCL6, CLASP1, EHD2, TAOK2, CKAP5, NF1, MAP1B, MYOZ1, EVL, …	3.72647e-08	down
GO:0048514	blood vessel morphogenesis	42	NRP2, WASF2, PRRX1, CSPG4, PRRX2, ENPEP, JAG1, ELK3, PTEN, GJC1, EDNRA, PTK2, CUL7, CXCR4, ROBO4, SEMA3C, PLCD1, NR2F2, THBS1, ANGPT2, RASA1, KLF5, PLAT, VHL, SMAD7, NF1, MMP19, ARHGAP24, UBP1, ANXA2, KDR, SMO, GPI, NOTCH1, BGN, MEOX2, ID1, LAMA5, NTRK2, POFUT1, ENG, PLAU	5.40994e-08	down
GO:0048598	embryonic morphogenesis	50	NDST1, TGFB3, PRRX1, ZEB2, PRRX2, ZEB1, GLI2, ZIC1, GJA5, SPRY2, RAB23, LDB1, ECSIT, VASP, HES1, ACVR2B, GNAQ, DLD, CFL1, EXT1, EXT2, NSD1, WNT5A, RBP4, TSHZ1, UGDH, MACF1, HOXA6, ALDH1A3, FBN2, TBX3, HTT, FTO, SMAD3, SMAD2, SMAD1, FZD6, NOTCH2, NOTCH1, TULP3, LAMA5, ITGA8, GFPT1, SP3, CDON, LRP6, PBX1, IFT52, PBX2, LRP5	1.5539e-06	down
GO:0001667	ameboidal cell migration	14	NRP2, ZFAND5, EFNB1, WASF2, ZEB2, EDNRB, SMO, CXCR4, LAMA5, CFL1, LRP6, SEMA3C, CAP1, LRP5	2.55201e-06	down
GO:0007242	intracellular signaling cascade	144	THOP1, STAT5A, STAT5B, TGFB3, ITPKB, LPAR1, PRKCSH, RGL1, S1PR2, PRKAR2B, S1PR3, AGTR1, TIAM2, RALB, RAB23, RALA, TLK1, GNG2, RARA, SPRED1, DDAH2, PAG1, IKBKAP, MAGI3, DFFA, SOCS7, SOCS5, STK4, MAP4K3, RND3, PIAS2, ASB2, STMN1, PIAS1, ASB5, EIF2AK3, WNT5A, HMGB2, ERBB3, PTPLAD1, ERBB2, STK17B, TIPIN, ARF6, MYO9B, CALR, MYO9A, CDC42EP1, RHOBTB2, RAB8B, TAOK2, MAP2K1, SMAD7, TAOK3, MET, MALT1, NDC8…	2.92231e-06	down
GO:0007167	enzyme linked receptor protein signaling pathway	52	MTSS1, MPZL1, NDST1, PDGFB, LTBP3, BCAR1, STAT5A, FST, STAT5B, TGFB3, FOXO1, FSTL1, PTEN, SHC1, TIE1, SOCS7, STXBP4, SOCS5, ECSIT, SS18, ACVR2B, HIPK2, EIF2AK3, FMOD, ZFAND5, ERBB3, ERBB2, EPHB4, PHIP, PTK2, RGMB, PTN, ANGPTL1, PLAT, TXNIP, NIN, SMAD7, CREB1, MET, PTPRA, SMAD5, SMAD3, IGF2, SMAD2, SMAD1, KDR, ERBB2IP, ID1, NTRK2, ARF4, SMURF2, ENG	7.15095e-06	down
GO:0006928	cell motion	66	NRP2, MTSS1, PDGFB, PLXNA2, BCAR1, WASF2, ZEB2, ENPEP, GLI2, PTEN, DSTN, EDNRB, NDE1, APP, CD44, CXCR4, SEMA3C, SEMA3B, CAP1, MSN, NR2F2, PTPRM, EFNB1, IL6R, VASP, CCNL2, SMO, CFL1, VCAN, WASL, ZFAND5, ERBB2, CALD1, ARF6, ARPC5, SCRIB, TPM4, TPM3, ALCAM, PTK2, MACF1, KATNA1, PPAP2A, THBS1, FN1, ACTB, PLAT, MAP2K1, TAOK2, VHL, MET, VAV2, KDR, SEMA6A, ITGA6, LAMA5, ETS1, ITGA5, FYN, ID1, LRP6, ENG,…	8.06189e-06	down
GO:0001525	angiogenesis	29	NRP2, WASF2, CSPG4, ENPEP, JAG1, ELK3, PTEN, EDNRA, PTK2, CXCR4, ROBO4, PLCD1, THBS1, ANGPT2, KLF5, VHL, MMP19, ARHGAP24, UBP1, ANXA2, KDR, GPI, NOTCH1, MEOX2, ID1, LAMA5, POFUT1, ENG, PLAU	1.16115e-05	down
GO:0016477	cell migration	44	NRP2, ZFAND5, PDGFB, PLXNA2, BCAR1, WASF2, ZEB2, ENPEP, PTEN, SCRIB, EDNRB, PTK2, NDE1, CD44, CXCR4, KATNA1, SEMA3C, CAP1, MSN, PPAP2A, NR2F2, THBS1, FN1, PLAT, TAOK2, VHL, EFNB1, MET, IL6R, VAV2, KDR, SMO, ITGA6, ID1, FYN, LAMA5, ITGA5, CFL1, LRP6, VCAN, ENG, PLAU, LRP5, MYH10	1.24808e-05	down
GO:0007517	muscle organ development	36	MEF2C, ZFAND5, RBP4, TNNC1, ERBB3, FHL1, ERBB2, UTRN, TAGLN3, PTEN, GJC1, APP, MYOG, MKX, NR2F2, MYF6, EVC, ACADM, ACTA1, SMAD7, MYH3, NF1, MET, RXRG, CSRP2, FLNB, SMTN, XIRP1, MEOX2, LAMA5, CHRND, SGCE, ENG, TCF12, SNTA1, MYH10	2.05917e-05	down
GO:0035295	tube development	37	WNT5A, RBP4, TGFB3, ZEB2, GLI2, GJA5, ASAH1, SCRIB, ADA, EDNRA, SPRY2, SPRY1, GPC3, CD44, CXCR4, CRISPLD2, LOX, PCSK5, MAN1A2, TBX3, SMAD2, VASP, FZD6, GZF1, KDR, HES1, MAN2A1, ACVR2B, NOTCH1, LAMA5, SP3, CFL1, PBX1, IFT52, ADAMTS2, ENG, NFIB	2.13782e-05	down
GO:0045597	positive regulation of cell differentiation	38	XRCC5, ZNF488, STAT5A, CSF1, STAT5B, TGFB3, ITPKB, JAG1, FOXO3, GLI2, ADA, ARNT, AGTR1, RARA, BOC, FNDC3B, SH3PXD2B, ARHGEF1, MAP2K1, ADAMTS20, VHL, PLXNB2, MAP1B, SMAD5, SMAD3, IGF2, SMAD2, BAD, SOCS5, SMAD1, IL6R, SMO, ACVR2B, NOTCH1, ETS1, SCIN, CAMK1, TGIF2	2.20283e-05	down
GO:0001501	skeletal system development	48	WNT5A, ZFAND5, RBP4, NDST1, LTBP3, TGFB3, PRRX1, PRRX2, ZEB1, GLI2, MMP2, GJA5, SUFU, HOXC8, HOXA6, PTN, COL12A1, PAPSS1, PCSK5, SPP1, EVC, BMP1, TBX3, RYK, NF1, SMAD5, SMAD3, IGF2, SMAD1, SPARC, COL5A2, ANXA2, SMO, ACVR2B, CTSK, TULP3, GNAQ, NAB2, ETS2, SP3, GFPT1, PBX1, EXT1, EXT2, EIF2AK3, BMP5, IGFBP4, CDH11	2.25156e-05	down
GO:0017015	regulation of transforming growth factor beta receptor signaling pathway	13	PEG10, ING2, HTRA1, ITGA8, HIPK2, TGFB3, SMAD3, SMAD2, SMURF2, SKIL, ZEB1, THBS1, ENG	2.90361e-05	down
GO:0007507	heart development	36	NRP2, RBP4, TNNC1, ERBB3, ERBB2, PDLIM3, GJA1, GLI2, GJA5, PTEN, GJC1, EDNRA, CASP3, PKD2, SEMA3C, CALCRL, BCOR, PCSK5, ACADM, TBX3, SMAD7, NF1, ADIPOR2, SMAD2, SMO, ACVR2B, NOTCH1, XIRP1, GNAQ, ID1, KCNJ8, IFT52, POFUT1, ENG, CASQ2, MYH10	3.09775e-05	down
GO:0009890	negative regulation of biosynthetic process	73	MEF2C, JDP2, PDGFB, FST, TGFB3, ZEB2, ZEB1, REST, GLI2, CBX5, EDNRA, HOXC8, NR2F2, KDM5B, EGR1, LDB1, ZHX1, IL6R, PKIA, NRIP2, GZF1, HES1, EIF2AK1, NAB2, HIPK2, MGEA5, LCOR, NSD1, EIF2AK3, EIF2AK4, EID1, HMGB2, TIPIN, IGF2BP2, ELK3, CALR, ZNF174, PAIP2B, ITGAV, PER1, PEX14, BCL6, SUPT4H1, SKIL, BCOR, TCF4, BAZ2A, ZNF423, MYF6, TBX3, KLF12, SMAD7, VHL, JARID2, GMNN, RYBP, TRIM27, YWHAB, SMAD3, SMA…	5.02618e-05	down
GO:0010324	membrane invagination	36	LDLR, AP1G1, WASF2, CDC42SE1, EEA1, PPT1, SNX4, EPS15L1, CYTH2, MEGF10, APLP1, APP, DAB2, AP1S2, CD93, ITGAV, NECAP2, CAP1, THBS1, EHD2, HIP1, RUFY1, LDLRAP1, CORO1C, SH3BP4, LRP10, TFRC, STAB1, FNBP1L, IGF2R, RAB22A, RAB34, LRP6, RIN2, LRP5, CLCN5	5.05873e-05	down
GO:0006897	endocytosis	36	LDLR, AP1G1, WASF2, CDC42SE1, EEA1, PPT1, SNX4, EPS15L1, CYTH2, MEGF10, APLP1, APP, DAB2, AP1S2, CD93, ITGAV, NECAP2, CAP1, THBS1, EHD2, HIP1, RUFY1, LDLRAP1, CORO1C, SH3BP4, LRP10, TFRC, STAB1, FNBP1L, IGF2R, RAB22A, RAB34, LRP6, RIN2, LRP5, CLCN5	5.05873e-05	down
GO:0030198	extracellular matrix organization	22	RECK, ADAMTS20, VHL, LUM, NF1, OLFML2A, ECM2, COL5A2, APLP1, ANXA2, CSGALNACT1, APP, PTK2, CRISPLD2, SMOC1, ITGA8, TGFBI, COL12A1, LOX, VWA1, ADAMTS2, ENG	5.22076e-05	down
GO:0007389	pattern specification process	41	TSHZ1, FST, ZEB2, ZEB1, ZIC1, GLI2, EDNRA, HOXC8, CXCR4, HOXA6, RAB23, PKD2, NR2F2, BCOR, PCSK5, MLLT3, MYF6, TBX3, HTT, LDB1, EFNB1, FTO, SMAD5, SMAD2, SMAD1, HES1, NOTCH2, SMO, ACVR2B, NOTCH1, TULP3, MEOX2, HIPK2, LRP6, PBX1, IFT52, POFUT1, PBX2, ENG, BMP5, LRP5	6.14843e-05	down
GO:0051094	positive regulation of developmental process	42	XRCC5, ZNF488, STAT5A, CSF1, FST, STAT5B, TGFB3, ITPKB, JAG1, FOXO3, GLI2, ADA, ARNT, AGTR1, RARA, THBS1, BOC, FNDC3B, SH3PXD2B, ARHGEF1, MAP2K1, VHL, ADAMTS20, PLXNB2, MAP1B, SMAD5, SMAD3, IGF2, SMAD2, BAD, SOCS5, SMAD1, IL6R, SMO, ACVR2B, NOTCH1, PLA2G4A, ETS1, SCIN, CAMK1, TGIF2, HDAC7	7.17614e-05	down
GO:0042127	regulation of cell proliferation	93	NAMPT, CNOT8, PDGFB, STAT5A, STAT5B, RBM5, PRRX1, TGFB3, FOXO1, GJA1, ZEB1, PRRX2, JAG1, GLI2, PTEN, SSR1, S1PR2, EDNRA, EDNRB, AGTR1, S1PR3, CASP3, GPC3, CDKN2C, SHC1, CALCRL, DHCR24, CDK13, ARHGEF2, PTPRM, ADAM10, EFNB1, CDK6, IL6R, VEGFB, HES1, SMO, CCND1, EIF2AK1, XIRP1, CCND2, HIPK2, SCIN, EIF2AK2, RBP4, ERBB3, CSF1, ERBB2, TIPIN, EGLN3, CALR, SESN1, ADA, CDH5, ARNT, RPA1, PTN, BCL6, THBS1, …	7.61465e-05	down
GO:0048870	cell motility	45	NRP2, ZFAND5, PDGFB, PLXNA2, BCAR1, WASF2, ZEB2, ENPEP, PTEN, SCRIB, EDNRB, PTK2, NDE1, CD44, CXCR4, KATNA1, SEMA3C, CAP1, MSN, PPAP2A, NR2F2, THBS1, FN1, PLAT, TAOK2, VHL, EFNB1, MET, IL6R, VAV2, KDR, SMO, ITGA6, ID1, FYN, ETS1, LAMA5, ITGA5, CFL1, LRP6, VCAN, ENG, PLAU, LRP5, MYH10	7.88298e-05	down
GO:0051674	localization of cell	45	NRP2, ZFAND5, PDGFB, PLXNA2, BCAR1, WASF2, ZEB2, ENPEP, PTEN, SCRIB, EDNRB, PTK2, NDE1, CD44, CXCR4, KATNA1, SEMA3C, CAP1, MSN, PPAP2A, NR2F2, THBS1, FN1, PLAT, TAOK2, VHL, EFNB1, MET, IL6R, VAV2, KDR, SMO, ITGA6, ID1, FYN, ETS1, LAMA5, ITGA5, CFL1, LRP6, VCAN, ENG, PLAU, LRP5, MYH10	7.88298e-05	down
GO:0031327	negative regulation of cellular biosynthetic process	71	MEF2C, JDP2, PDGFB, FST, TGFB3, ZEB2, ZEB1, REST, GLI2, CBX5, EDNRA, HOXC8, NR2F2, KDM5B, EGR1, LDB1, ZHX1, PKIA, NRIP2, GZF1, HES1, EIF2AK1, NAB2, HIPK2, MGEA5, LCOR, NSD1, EIF2AK3, EIF2AK4, EID1, HMGB2, TIPIN, IGF2BP2, ELK3, CALR, ZNF174, PAIP2B, PER1, PEX14, BCL6, SUPT4H1, SKIL, BCOR, TCF4, BAZ2A, ZNF423, MYF6, TBX3, KLF12, SMAD7, VHL, JARID2, GMNN, RYBP, TRIM27, YWHAB, SMAD3, SMAD2, IGF2, ATP…	7.98247e-05	down
GO:0022604	regulation of cell morphogenesis	25	RHOJ, ARHGEF1, TAOK2, SMAD7, PLXNB2, MAP1B, TGFB3, SMAD3, CDC42SE1, SMAD2, SMAD1, GAS7, TTL, TTC3, KDR, PTK2, CDC42EP1, FYN, CYFIP1, CDC42EP3, AKAP2, RASA1, MYH10, FN1, SPP1	8.18512e-05	down
GO:0060541	respiratory system development	22	WNT5A, RBP4, MAN1A2, TGFB3, SMAD2, GLI2, ADA, ASAH1, KDR, HES1, MAN2A1, SPRY2, ACVR2B, NOTCH1, TULP3, CRISPLD2, LAMA5, ALDH1A3, SP3, LOX, ADAMTS2, NFIB	9.28109e-05	down
GO:0006468	protein amino acid phosphorylation	81	CDK17, STAT5A, STK35, TGFB3, FER, LPAR1, FES, LATS1, DMPK, CSNK2A2, S1PR2, APP, CXCR4, EEF2K, SHC1, TLK1, TIE1, CDK14, CDK13, SRPK2, IKBKAP, ADAM10, PKN2, PRKCI, CDK6, STK4, WEE1, SRPK1, PRKD1, MAP4K3, PRKD2, CCND1, ACVR2B, EIF2AK1, MAPK6, HIPK2, CFL1, NEK8, TESK1, CDK2AP1, CAMK1, NRK, EIF2AK2, EIF2AK3, EIF2AK4, NEK6, PRKD3, CAMK1D, MAP3K11, ERBB3, PTPLAD1, STK10, ERBB2, STK17B, EPHB4, PTK2, YES1…	9.9215e-05	down
GO:0010558	negative regulation of macromolecule biosynthetic process	69	MEF2C, JDP2, FST, TGFB3, ZEB2, ZEB1, REST, GLI2, CBX5, HOXC8, NR2F2, KDM5B, EGR1, LDB1, ZHX1, IL6R, PKIA, NRIP2, GZF1, HES1, EIF2AK1, NAB2, HIPK2, MGEA5, LCOR, NSD1, EIF2AK3, EIF2AK4, EID1, HMGB2, TIPIN, IGF2BP2, ELK3, CALR, ZNF174, PAIP2B, ITGAV, PER1, PEX14, BCL6, SUPT4H1, SKIL, BCOR, TCF4, BAZ2A, ZNF423, MYF6, TBX3, KLF12, VHL, JARID2, SMAD7, GMNN, RYBP, TRIM27, YWHAB, SMAD3, SMAD2, TRIM24, SN…	0.000112475	down
GO:0060548	negative regulation of cell death	50	XRCC5, MEF2C, STAT5A, STAT5B, TGFB3, FOXO1, PTEN, EDNRB, CASP3, DDAH2, CASP2, DHCR24, NOL3, SLC25A4, DFFA, ADAMTS20, PRKCI, ADNP, NME6, AMIGO2, SMO, HIPK2, CFL1, YWHAZ, ERBB3, ERBB2, PPT1, ADA, PEA15, CHD8, SQSTM1, PPP2CB, BCL6, THBS1, RASA1, CFLAR, TBX3, SPHK2, VHL, HTT, SMAD3, IGF2, MALT1, NOTCH2, NOTCH1, CDKN1A, HSP90B1, PSMC5, HDAC1, GSK3B	0.000118802	down
GO:0030323	respiratory tube development	21	WNT5A, RBP4, MAN1A2, TGFB3, SMAD2, GLI2, ADA, ASAH1, KDR, HES1, MAN2A1, SPRY2, ACVR2B, NOTCH1, CRISPLD2, LAMA5, SP3, LOX, PCSK5, ADAMTS2, NFIB	0.000119869	down
GO:0000902	cell morphogenesis	49	NRP2, PIP5K1C, GJA1, GLI2, NDE1, APP, DAB2, CXCR4, SEMA3B, CAP1, ARHGEF2, PTPRM, EFNB1, PRKCI, PCM1, STK4, VASP, HES1, SS18, BBS2, SMO, CFL1, VCAN, RTN4RL1, ERBB3, ERBB2, SCRIB, ALCAM, PTK2, MACF1, CLASP1, BCL6, LAMB1, FN1, ACTB, MAP2K1, VHL, RYK, CREB1, MAP1B, NDC80, GAS7, SEMA6A, NOTCH1, ERBB2IP, LAMA5, CYFIP1, FEZ2, MYH10	0.000174157	down
GO:0032535	regulation of cellular component size	40	TRIOBP, EXTL3, LIMA1, PDGFB, FHL1, TGFB3, ARF6, PPT1, ARPC5, CCNG1, LATS1, DSTN, LUZP6, APP, DAB2, CDKN2C, BCL6, RASA1, SPP1, ADAM10, ACTA1, CREB1, MAP1B, ADIPOR2, SMAD3, NPR1, IGF2, TMSB10, SOCS5, CSRP2, NOTCH2, PHF17, CDKN1A, PRDM4, ERBB2IP, WHSC1L1, CFL1, SCIN, CYFIP1, SPTAN1	0.000180494	down
GO:0032989	cellular component morphogenesis	53	NRP2, PIP5K1C, GJA1, GLI2, NDE1, APP, DAB2, CXCR4, SEMA3B, CAP1, ARHGEF2, PTPRM, ACTA1, EFNB1, PRKCI, PCM1, STK4, VASP, HES1, SMO, SS18, BBS2, XIRP1, CFL1, VCAN, RTN4RL1, ERBB3, ERBB2, SCRIB, ALCAM, PTK2, MACF1, CLASP1, BCL6, LAMB1, FN1, ACTB, MAP2K1, VHL, RYK, CREB1, MAP1B, NDC80, MYOZ1, GAS7, SEMA6A, NOTCH1, ERBB2IP, LAMA5, CYFIP1, FEZ2, MYH10, TMOD1	0.000198108	down
GO:0043069	negative regulation of programmed cell death	49	XRCC5, MEF2C, STAT5A, STAT5B, TGFB3, FOXO1, PTEN, EDNRB, CASP3, DDAH2, CASP2, DHCR24, NOL3, DFFA, ADAMTS20, PRKCI, ADNP, NME6, AMIGO2, SMO, HIPK2, CFL1, YWHAZ, ERBB3, ERBB2, PPT1, ADA, PEA15, CHD8, SQSTM1, PPP2CB, BCL6, THBS1, RASA1, CFLAR, TBX3, SPHK2, VHL, HTT, SMAD3, IGF2, MALT1, NOTCH2, NOTCH1, CDKN1A, HSP90B1, PSMC5, HDAC1, GSK3B	0.00021232	down
GO:0001503	ossification	22	BMP1, NF1, SMAD5, TGFB3, SMAD3, IGF2, SPARC, SMAD1, GLI2, MMP2, COL5A2, SMO, CTSK, NAB2, SP3, PTN, EXT1, EXT2, EIF2AK3, BMP5, CDH11, SPP1	0.000233828	down
GO:0030324	lung development	20	WNT5A, RBP4, MAN1A2, TGFB3, SMAD2, GLI2, ADA, ASAH1, KDR, HES1, MAN2A1, SPRY2, ACVR2B, NOTCH1, CRISPLD2, LAMA5, SP3, LOX, ADAMTS2, NFIB	0.000235391	down
GO:0016044	membrane organization	51	SEC31A, LDLR, AP1G1, WASF2, EPS15L1, MEGF10, APP, DAB2, AP1S2, CD93, NECAP2, CAP1, TIE1, SEC24D, DHCR24, SEC23A, STX6, PRKCI, LDLRAP1, LRP10, FNBP1L, IGF2R, RIN2, GNAI3, CDC42SE1, SNX4, CYTH2, PPT1, EEA1, APLP1, ITGAV, SNAP23, THBS1, EHD2, HIP1, HTT, RUFY1, CORO1C, SH3BP4, TFRC, PLSCR4, STAB1, PLSCR3, RAB34, RAB22A, LRP6, SH3D19, CHRNB1, MYH10, CLCN5, LRP5	0.000250736	down
GO:0070482	response to oxygen levels	25	PLAT, ATP1B1, NOL3, PDGFB, VHL, NF1, STAT5B, EGLN3, TGFB3, SMAD3, PDLIM1, XRCC1, MMP2, ADA, ARNT, DDIT4, EDNRA, CDKN1A, HSP90B1, TFRC, CXCR4, PLOD2, THBS1, ENG, PLAU	0.000264801	down
GO:0045646	regulation of erythrocyte differentiation	8	LMO2, ETS1, LDB1, STAT5A, STAT5B, CDK6, FOXO3, ARNT	0.000274438	down
GO:0043066	negative regulation of apoptosis	48	MEF2C, XRCC5, YWHAZ, ERBB3, STAT5A, ERBB2, STAT5B, TGFB3, FOXO1, PPT1, PTEN, ADA, PEA15, EDNRB, CHD8, CASP3, SQSTM1, PPP2CB, BCL6, DDAH2, THBS1, CASP2, RASA1, DHCR24, CFLAR, NOL3, SPHK2, TBX3, HTT, VHL, DFFA, ADAMTS20, ADNP, PRKCI, SMAD3, MALT1, IGF2, NME6, NOTCH2, SMO, AMIGO2, HSP90B1, CDKN1A, NOTCH1, HDAC1, GSK3B, HIPK2, CFL1	0.000289243	down
GO:0060537	muscle tissue development	23	MYF6, RBP4, ZFAND5, ACADM, ACTA1, ERBB3, SMAD7, TNNC1, ERBB2, NF1, UTRN, RXRG, PTEN, GJC1, APP, XIRP1, MEOX2, CHRND, MYOG, NR2F2, ENG, MYH10, SNTA1	0.000289707	down
GO:0001666	response to hypoxia	24	PLAT, ATP1B1, NOL3, PDGFB, VHL, NF1, STAT5B, EGLN3, TGFB3, SMAD3, PDLIM1, XRCC1, MMP2, ADA, ARNT, DDIT4, EDNRA, HSP90B1, TFRC, CXCR4, PLOD2, THBS1, ENG, PLAU	0.00031113	down
GO:0006357	regulation of transcription from RNA polymerase II promoter	84	MEF2C, JDP2, STAT5A, STAT5B, FST, TGFB3, FOXO1, CNOT2, ANKRD1, ZEB1, MED22, FOXO3, GLI2, HOXC8, APP, TRAK2, SMARCD1, NR2F2, EGR1, IKBKAP, RXRG, ECSIT, PKIA, AHR, NRIP2, GZF1, HES1, IFNAR2, NCOA1, HIPK2, MED18, CAND1, LCOR, NSD1, EID1, CAMTA2, HMGB2, TADA3, ABLIM3, ZNF367, CALR, ARNT, ZNF174, CHD8, SQSTM1, HTATSF1, BCL6, MYOG, SUPT4H1, SKIL, BCOR, NFATC2, TCF4, CHD3, MYF6, TAF4, TBX3, MAP2K1, KLF1…	0.000367457	down
GO:0034330	cell junction organization	14	TAOK2, SMAD7, PRKCI, TGFB3, SMAD3, GJA1, ACTN2, CTNNA1, GJA5, GJC1, ITGA6, ITGA5, LAMA5, FN1	0.000397727	down
GO:0048736	appendage development	20	WNT5A, TBX3, FTO, PRRX1, PRRX2, GJA5, NOTCH2, NOTCH1, TULP3, GNAQ, MEOX2, RAB23, LRP6, PBX1, FBN2, IFT52, NR2F2, PBX2, PCSK5, LRP5	0.000399102	down
GO:0060173	limb development	20	WNT5A, TBX3, FTO, PRRX1, PRRX2, GJA5, NOTCH2, NOTCH1, TULP3, GNAQ, MEOX2, RAB23, LRP6, PBX1, FBN2, IFT52, NR2F2, PBX2, PCSK5, LRP5	0.000399102	down
GO:0048729	tissue morphogenesis	29	FRAS1, TNNC1, FST, ZEB2, JAG1, GLI2, SCRIB, GPC3, MACF1, CD44, ALDH1A3, TBX3, SMAD7, HTT, SMAD3, SMAD2, SMAD1, ECSIT, VASP, FZD6, GZF1, NOTCH2, NOTCH1, LAMA5, FREM2, CFL1, PBX1, IFT52, EXT2	0.000402734	down
GO:0016481	negative regulation of transcription	58	MEF2C, JDP2, FST, ZEB2, REST, ZEB1, GLI2, CBX5, HOXC8, NR2F2, KDM5B, EGR1, LDB1, ZHX1, PKIA, NRIP2, GZF1, HES1, NAB2, HIPK2, LCOR, NSD1, EID1, HMGB2, ELK3, CALR, ZNF174, PER1, PEX14, BCL6, SKIL, SUPT4H1, BCOR, TCF4, BAZ2A, ZNF423, MYF6, TBX3, KLF12, VHL, JARID2, SMAD7, RYBP, TRIM27, YWHAB, SMAD3, SMAD2, TRIM24, SNAI2, UBP1, PSMC5, HDAC1, ID1, JAZF1, YWHAQ, DNMT1, SMURF2, ENG	0.000403497	down
GO:0010941	regulation of cell death	92	XRCC5, MEF2C, PDIA3, PREX1, STAT5A, BCAR1, STAT5B, RBM5, TGFB3, FOXO1, FOXO3, PTEN, EDNRB, CASP3, APP, PTGIS, TIAM2, CASP9, CD44, CDKN2C, PCBP4, DAP, DDAH2, CASP2, TOP2A, DHCR24, ARHGEF2, NOL3, SLC25A4, DFFA, ADAMTS20, AIFM1, ADNP, PRKCI, ARHGEF17, ACTN2, IL6R, STK4, NME6, SMO, AMIGO2, IGF2R, HIPK2, SCIN, CFL1, EIF2AK3, MAP3K11, CAMK1D, TRAF1, ING3, YWHAZ, ERBB3, ERBB2, STK17B, PPT1, CALR, SCRIB,…	0.000413814	down
GO:0030155	regulation of cell adhesion	24	ADAM10, MAP2K1, ERBB3, SMAD7, STAT5A, CSF1, ERBB2, NF1, STAT5B, SMAD3, CDK6, ECM2, PTEN, ADA, LAMA4, ITGA6, LAMA5, SMOC1, TGFBI, BCL6, THBS1, ENG, RASA1, SPP1	0.000432061	down
GO:0016192	vesicle-mediated transport	69	SEC31A, LDLR, ATL2, AP1G1, WASF2, USE1, EPS15L1, TXLNA, MEGF10, DAB2, AP2B1, APP, AP1S2, CD93, NECAP2, CAP1, SEC24D, STX6, SEC23A, KDELR3, NCALD, PRKCI, VPS41, LDLRAP1, ERGIC1, ANKRD27, LRP10, STXBP6, FNBP1L, IGF2R, SCIN, RIN2, YWHAZ, ARFGAP3, GNAI3, CDC42SE1, EEA1, PPT1, CYTH2, SNX4, ARF6, APLP1, SQSTM1, AP3M1, ITGAV, SNAP23, THBS1, EHD2, EXOC2, HIP1, RAB2B, HTT, SCRN1, RUFY1, TINAGL1, CORO1C, S…	0.000499605	down
GO:0051301	cell division	41	RBP4, LZTS2, FZR1, BCAR1, CETN3, TIPIN, RCC1, CCNG1, SENP5, CCNG2, LATS1, DSTN, NDE1, NCAPH, KATNA1, CLASP1, RASA1, CDK13, CENPO, ARHGEF2, PDS5B, KIF11, ANAPC5, CKAP5, PAPD7, CDK6, NDC80, MCM5, WEE1, SMC3, TACC1, NCAPD2, CCNB1, CCND1, NOTCH1, MAD2L1, CCND2, CFL1, HAUS8, NEK6, MYH10	0.000524089	down
GO:0043067	regulation of programmed cell death	91	XRCC5, MEF2C, PDIA3, PREX1, STAT5A, BCAR1, STAT5B, RBM5, TGFB3, FOXO1, FOXO3, PTEN, EDNRB, CASP3, APP, PTGIS, TIAM2, CASP9, CD44, CDKN2C, PCBP4, DAP, DDAH2, CASP2, TOP2A, DHCR24, ARHGEF2, NOL3, DFFA, ADAMTS20, AIFM1, ADNP, PRKCI, ARHGEF17, ACTN2, IL6R, STK4, NME6, SMO, AMIGO2, IGF2R, HIPK2, SCIN, CFL1, EIF2AK3, MAP3K11, CAMK1D, TRAF1, ING3, YWHAZ, ERBB3, ERBB2, STK17B, PPT1, CALR, SCRIB, ADA, PEA…	0.000563664	down
GO:0060348	bone development	22	BMP1, NF1, SMAD5, TGFB3, SMAD3, IGF2, SPARC, SMAD1, GLI2, MMP2, COL5A2, SMO, CTSK, NAB2, SP3, PTN, EXT1, EXT2, EIF2AK3, BMP5, CDH11, SPP1	0.000599948	down
GO:0045892	negative regulation of transcription, DNA-dependent	47	MEF2C, EID1, JDP2, FST, REST, ZEB1, CALR, GLI2, CBX5, ZNF174, HOXC8, PEX14, BCL6, SUPT4H1, SKIL, TCF4, NR2F2, BCOR, BAZ2A, KDM5B, EGR1, KLF12, TBX3, VHL, SMAD7, JARID2, LDB1, ZHX1, RYBP, TRIM27, SMAD3, SMAD2, TRIM24, SNAI2, PKIA, NRIP2, GZF1, HES1, HDAC1, ID1, HIPK2, YWHAQ, JAZF1, DNMT1, LCOR, NSD1, ENG	0.000611894	down
GO:0042981	regulation of apoptosis	90	XRCC5, MEF2C, PDIA3, PREX1, STAT5A, BCAR1, STAT5B, RBM5, TGFB3, FOXO1, FOXO3, PTEN, EDNRB, CASP3, APP, PTGIS, TIAM2, CASP9, CD44, CDKN2C, PCBP4, DAP, DDAH2, CASP2, TOP2A, DHCR24, ARHGEF2, NOL3, DFFA, ADAMTS20, AIFM1, ADNP, PRKCI, ARHGEF17, ACTN2, IL6R, STK4, NME6, SMO, AMIGO2, IGF2R, HIPK2, SCIN, CFL1, EIF2AK3, MAP3K11, CAMK1D, TRAF1, ING3, YWHAZ, ERBB3, ERBB2, STK17B, PPT1, CALR, SCRIB, ADA, PEA…	0.000625338	down
GO:0030030	cell projection organization	48	NRP2, MTSS1, LIMA1, PDGFB, RTN4RL1, ERBB3, ERBB2, WASF2, PIP5K1C, GJA1, ARF6, LPAR1, GLI2, PTEN, ALCAM, PTK2, APP, MACF1, CD44, CXCR4, ATXN10, SEMA3B, LAMB1, KLF5, ACTB, PTPRM, MAP2K1, RYK, CREB1, EFNB1, MAP1B, ACTN2, PCM1, VAV2, LPIN1, GAS7, VASP, SMO, SEMA6A, BBS2, NOTCH1, ITGA6, LAMA5, ITGA8, CYFIP1, VCAN, FEZ2, MYH10	0.000691623	down
GO:0001889	liver development	13	ACADM, JARID2, ERBB2, STAT5B, NF1, ARF6, ADA, HES1, MAN2A1, NOTCH1, CCND1, CCND2, SP3	0.000706826	down
GO:0007169	transmembrane receptor protein tyrosine kinase signaling pathway	33	ZFAND5, MTSS1, MPZL1, NDST1, PDGFB, ERBB3, STAT5A, ERBB2, BCAR1, STAT5B, FOXO1, EPHB4, PTEN, PHIP, PTK2, ANGPTL1, SHC1, TIE1, TXNIP, PLAT, NIN, PTPRA, MET, SOCS7, IGF2, SOCS5, STXBP4, KDR, SS18, ERBB2IP, ARF4, NTRK2, EIF2AK3	0.000752499	down
GO:0045934	negative regulation of nucleobase, nucleoside, nucleotide and nucleic acid metabolic process	62	MEF2C, JDP2, FST, TGFB3, ZEB2, REST, ZEB1, GLI2, CBX5, EDNRA, HOXC8, NR2F2, KDM5B, EGR1, LDB1, ZHX1, PKIA, NRIP2, GZF1, HES1, NAB2, HIPK2, LCOR, NSD1, EID1, HMGB2, TIPIN, ELK3, CALR, ZNF174, PER1, PEX14, BCL6, SUPT4H1, SKIL, BCOR, TCF4, BAZ2A, ZNF423, MYF6, TBX3, KLF12, VHL, JARID2, SMAD7, GMNN, RYBP, TRIM27, YWHAB, SMAD3, SMAD2, TRIM24, SNAI2, UBP1, PSMC5, HDAC1, ID1, JAZF1, YWHAQ, DNMT1, SMURF2…	0.000757958	down
GO:0006605	protein targeting	32	XPO1, YWHAZ, PDIA3, TGFB3, AKAP12, MIPEP, CALR, SEC62, SSR1, MACF1, TRAK2, AP3M1, PEX14, BCL6, TNPO1, TAOK2, HTT, IPO13, IPO11, YWHAB, PRKCI, STXBP4, TIMM44, PPIH, ERBB2IP, GSK3B, YWHAQ, PTTG1IP, MGEA5, KPNA2, KPNA1, RERE	0.000772381	down
GO:0006793	phosphorus metabolic process	105	STAT5A, STK35, TGFB3, PTPN21, LPAR1, DMPK, CSNK2A2, S1PR2, APP, TLK1, IKBKAP, PTPRM, PTPRS, STK4, WEE1, MAP4K3, EIF2AK1, MAPK6, DLD, TESK1, NEK8, CAMK1, EIF2AK2, EIF2AK3, EIF2AK4, NEK6, ERBB3, PTPLAD1, STK10, ERBB2, SSH2, STK17B, EPHB4, PTK2, GPD2, GPD1, PTPN9, PTPN18, TAOK2, MAP2K1, NIN, RYK, TAOK1, SMAD7, MET, TAOK3, SMAD2, PTPN12, PPA1, KDR, CDC42BPG, PLK2, NDUFV1, NTRK2, GRK5, CDK17, FER, FES…	0.000779083	down
GO:0006796	phosphate metabolic process	105	STAT5A, STK35, TGFB3, PTPN21, LPAR1, DMPK, CSNK2A2, S1PR2, APP, TLK1, IKBKAP, PTPRM, PTPRS, STK4, WEE1, MAP4K3, EIF2AK1, MAPK6, DLD, TESK1, NEK8, CAMK1, EIF2AK2, EIF2AK3, EIF2AK4, NEK6, ERBB3, PTPLAD1, STK10, ERBB2, SSH2, STK17B, EPHB4, PTK2, GPD2, GPD1, PTPN9, PTPN18, TAOK2, MAP2K1, NIN, RYK, TAOK1, SMAD7, MET, TAOK3, SMAD2, PTPN12, PPA1, KDR, CDC42BPG, PLK2, NDUFV1, NTRK2, GRK5, CDK17, FER, FES…	0.000779083	down
GO:0008360	regulation of cell shape	13	RHOJ, TAOK2, CDC42SE1, GAS7, KDR, CDC42EP1, FYN, CYFIP1, CDC42EP3, AKAP2, RASA1, MYH10, FN1	0.000844582	down
GO:0051253	negative regulation of RNA metabolic process	47	MEF2C, EID1, JDP2, FST, REST, ZEB1, CALR, GLI2, CBX5, ZNF174, HOXC8, PEX14, BCL6, SUPT4H1, SKIL, TCF4, NR2F2, BCOR, BAZ2A, KDM5B, EGR1, KLF12, TBX3, VHL, SMAD7, JARID2, LDB1, ZHX1, RYBP, TRIM27, SMAD3, SMAD2, TRIM24, SNAI2, PKIA, NRIP2, GZF1, HES1, HDAC1, ID1, HIPK2, YWHAQ, JAZF1, DNMT1, LCOR, NSD1, ENG	0.000873912	down
GO:0007369	gastrulation	15	ACVR2B, MACF1, HTT, LDB1, DLD, LRP6, UGDH, SMAD3, SMAD2, SMAD1, ECSIT, EXT1, NSD1, EXT2, LRP5	0.0009879	down
GO:0043062	extracellular structure organization	26	ERBB2, LUM, UTRN, APLP1, APP, PTK2, CRISPLD2, SMOC1, TGFBI, COL12A1, LOX, VWA1, RECK, ADAMTS20, VHL, NF1, MAP1B, OLFML2A, ECM2, COL5A2, ANXA2, CSGALNACT1, ITGA8, ADAMTS2, ENG, SNTA1	0.00099086	down
GO:0042060	wound healing	29	GGCX, MYF6, PLAT, HPS5, PDGFB, GATM, ERBB3, EFEMP2, ERBB2, NF1, TGFB3, SMAD3, IGF2, ELK3, SMAD1, LUZP6, CCNB1, NOTCH3, NOTCH2, NOTCH1, CD44, GNAQ, PLSCR4, ITGA5, LOX, ENG, PLAU, FN1, MYH10	0.00104869	down
GO:0034329	cell junction assembly	11	ITGA6, TAOK2, ITGA5, SMAD7, LAMA5, GJA1, ACTN2, CTNNA1, GJA5, FN1, GJC1	0.00105288	down
GO:0051172	negative regulation of nitrogen compound metabolic process	62	MEF2C, JDP2, FST, TGFB3, ZEB2, REST, ZEB1, GLI2, CBX5, EDNRA, HOXC8, NR2F2, KDM5B, EGR1, LDB1, ZHX1, PKIA, NRIP2, GZF1, HES1, NAB2, HIPK2, LCOR, NSD1, EID1, HMGB2, TIPIN, ELK3, CALR, ZNF174, PER1, PEX14, BCL6, SUPT4H1, SKIL, BCOR, TCF4, BAZ2A, ZNF423, MYF6, TBX3, KLF12, VHL, JARID2, SMAD7, GMNN, RYBP, TRIM27, YWHAB, SMAD3, SMAD2, TRIM24, SNAI2, UBP1, PSMC5, HDAC1, ID1, JAZF1, YWHAQ, DNMT1, SMURF2…	0.00105626	down
GO:0007178	transmembrane receptor protein serine/threonine kinase signaling pathway	19	FMOD, PDGFB, LTBP3, SMAD7, CREB1, SMAD5, FST, TGFB3, SMAD3, SMAD2, FSTL1, SMAD1, ECSIT, ACVR2B, RGMB, ID1, HIPK2, SMURF2, ENG	0.00108723	down
GO:0030326	embryonic limb morphogenesis	17	WNT5A, TBX3, FTO, PRRX1, PRRX2, GJA5, NOTCH2, NOTCH1, TULP3, GNAQ, LRP6, RAB23, PBX1, FBN2, IFT52, PBX2, LRP5	0.00115344	down
GO:0035113	embryonic appendage morphogenesis	17	WNT5A, TBX3, FTO, PRRX1, PRRX2, GJA5, NOTCH2, NOTCH1, TULP3, GNAQ, LRP6, RAB23, PBX1, FBN2, IFT52, PBX2, LRP5	0.00115344	down
GO:0007015	actin filament organization	15	ARHGEF2, LIMA1, ACTA1, PREX1, BCAR1, CALD1, PRKCI, PDLIM3, EVL, GAS7, DSTN, PPP1R9A, SCIN, CFL1, WASL	0.0013178	down
GO:0010629	negative regulation of gene expression	60	MEF2C, JDP2, FST, ZEB2, REST, ZEB1, GLI2, CBX5, HOXC8, NR2F2, KDM5B, EGR1, LDB1, ZHX1, PKIA, NRIP2, GZF1, HES1, NAB2, HIPK2, LCOR, NSD1, EID1, HMGB2, ELK3, CALR, ZNF174, PER1, PEX14, BCL6, SUPT4H1, SKIL, BCOR, TNRC6B, TCF4, BAZ2A, ZNF423, MYF6, TBX3, KLF12, VHL, JARID2, SMAD7, RYBP, TRIM27, YWHAB, SMAD3, SMAD2, TRIM24, SMAD1, SNAI2, UBP1, PSMC5, HDAC1, ID1, JAZF1, YWHAQ, DNMT1, SMURF2, ENG	0.00140556	down
GO:0001755	neural crest cell migration	8	NRP2, SMO, EDNRB, LAMA5, EFNB1, CFL1, SEMA3C, ZEB2	0.00148994	down
GO:0060284	regulation of cell development	30	XRCC5, ZNF488, TGFB3, REST, GLI2, CALR, TTC3, TTL, PTK2, BOC, SPP1, ARHGEF1, TBX3, SMAD7, PLXNB2, NF1, MAP1B, SMAD3, IGF2, SMAD2, SMAD1, NOTCH3, HES1, SMO, NOTCH1, HDAC1, CCND2, NTRK2, PBX1, TGIF2	0.00151739	down
GO:0035107	appendage morphogenesis	18	WNT5A, TBX3, FTO, PRRX1, PRRX2, GJA5, NOTCH2, NOTCH1, TULP3, GNAQ, LRP6, RAB23, PBX1, FBN2, IFT52, PBX2, PCSK5, LRP5	0.00180032	down
GO:0035108	limb morphogenesis	18	WNT5A, TBX3, FTO, PRRX1, PRRX2, GJA5, NOTCH2, NOTCH1, TULP3, GNAQ, LRP6, RAB23, PBX1, FBN2, IFT52, PBX2, PCSK5, LRP5	0.00180032	down
GO:0001955	blood vessel maturation	4	RECK, CD44, MMP2, CDH5	0.00184719	down
GO:0030509	BMP signaling pathway	11	ACVR2B, RGMB, ID1, SMAD7, FST, SMAD5, FSTL1, SMURF2, SMAD1, ECSIT, ENG	0.00187696	down
GO:0000122	negative regulation of transcription from RNA polymerase II promoter	36	MEF2C, EID1, JDP2, FST, ZEB1, CALR, GLI2, ZNF174, HOXC8, BCL6, SKIL, SUPT4H1, TCF4, NR2F2, BCOR, EGR1, KLF12, SMAD7, JARID2, VHL, RYBP, TRIM27, SMAD3, SNAI2, PKIA, NRIP2, GZF1, HES1, HDAC1, ID1, HIPK2, JAZF1, DNMT1, LCOR, NSD1, ENG	0.00191603	down
GO:0007612	learning	13	PRKAR2B, APP, AAAS, CHST10, HTT, BCHE, FYN, NF1, PTN, ATP1A2, VDAC3, RIC8A, VDAC1	0.00222246	down
GO:0002009	morphogenesis of an epithelium	18	FRAS1, HTT, ZEB2, JAG1, GLI2, SCRIB, VASP, FZD6, GZF1, NOTCH2, GPC3, CD44, FREM2, LAMA5, ALDH1A3, CFL1, PBX1, IFT52	0.00224713	down
GO:0014706	striated muscle tissue development	20	MYF6, RBP4, ACADM, ACTA1, ERBB3, SMAD7, TNNC1, ERBB2, UTRN, RXRG, PTEN, GJC1, APP, XIRP1, MEOX2, CHRND, MYOG, NR2F2, MYH10, SNTA1	0.00240152	down
GO:0040007	growth	27	PDGFB, FHL1, TGFB3, FOXO3, CCNG1, GLI2, LUZP6, APP, MYF6, ACTA1, GATM, TAF8, SMAD2, SOCS5, CSRP2, NOTCH3, CCNB1, NOTCH2, SMO, ACVR2B, NOTCH1, ERBB2IP, WHSC1L1, CYFIP1, CHRND, BMP5, PLAU	0.00243775	down
GO:0009100	glycoprotein metabolic process	29	OSTC, GALNT1, NDST1, LDLR, NDST2, TSPAN7, DSE, B3GNT9, ST6GALNAC6, GALNT10, TRAK2, ST3GAL4, DHCR24, MGAT4B, MAN1A2, B3GALT2, FUT11, NCSTN, CSGALNACT1, MAN2A1, ADAMTS9, BGN, ST8SIA4, SULF1, BACE1, MGEA5, EXT1, POFUT1, EXT2	0.00245468	down
GO:0010033	response to organic substance	79	ARSB, LDLR, PDGFB, STAT5A, BCAR1, STAT5B, TGFB3, FOXO1, XRCC1, LATS1, PTEN, ASAH1, GOT2, EDNRA, PRKAR2B, CASP3, CD44, CREB3L2, RARA, SHC1, GNG2, LOX, DDAH2, EGR1, ADAM10, ACTA1, GATM, ADIPOR2, PRKCI, SOCS7, IL6R, STXBP4, LPIN1, GLUL, CCND1, ACVR2B, CCND2, SLC25A36, CFL1, MGEA5, HSPB3, EIF2AK2, EIF2AK3, EIF2AK4, RBP4, HMGB2, PANX1, ERBB3, ERBB2, ADH5, CALCOCO2, GNG12, C1S, TTC3, PHIP, BCHE, THBS1,…	0.00255221	down
GO:0016049	cell growth	13	NOTCH2, APP, ACTA1, PDGFB, ERBB2IP, FHL1, WHSC1L1, TGFB3, CYFIP1, SOCS5, CCNG1, CSRP2, LUZP6	0.00257221	down
GO:0045935	positive regulation of nucleobase, nucleoside, nucleotide and nucleic acid metabolic process	70	MEF2C, PDGFB, STAT5A, STAT5B, TGFB3, FOXO1, ZEB1, FOXO3, GLI2, APP, SMARCD1, SHC1, NR2F2, EGR1, RXRG, AHR, EYA3, HES1, NCOA1, HIPK2, MGEA5, CAND1, PIAS2, PIAS1, NSD1, CAMTA2, HMGB2, ING2, ABLIM3, AFAP1L2, CALR, ARNT, CHD8, RGMB, SQSTM1, RNF168, MYOG, SUPT4H1, NFATC2, TCF4, ZNF423, MYF6, KLF5, TBX3, MAP2K1, KLF12, VHL, TAF8, CREB1, TP53BP1, SMAD5, SMAD3, NPR1, SMAD2, CREB5, TEAD2, IGF2, TRIM24, SM…	0.00258912	down
GO:0031099	regeneration	14	MYF6, GATM, RTN4RL1, MAP1B, LUZP6, NOTCH3, CCNB1, SMO, NOTCH2, CDKN1A, NOTCH1, CCND1, VCAN, PLAU	0.00259806	down
GO:0010810	regulation of cell-substrate adhesion	11	SMOC1, CSF1, NF1, SMAD3, CDK6, BCL6, ECM2, THBS1, PTEN, RASA1, SPP1	0.00267031	down
GO:0016310	phosphorylation	86	CDK17, STAT5A, STK35, TGFB3, FER, LPAR1, FES, LATS1, DMPK, CSNK2A2, S1PR2, APP, CXCR4, EEF2K, SHC1, TLK1, TIE1, CDK14, CDK13, SRPK2, IKBKAP, ADAM10, PKN2, PRKCI, CDK6, STK4, WEE1, SRPK1, PRKD1, MAP4K3, PRKD2, CCND1, ACVR2B, EIF2AK1, MAPK6, HIPK2, DLD, CFL1, NEK8, TESK1, CDK2AP1, CAMK1, NRK, EIF2AK2, EIF2AK3, EIF2AK4, NEK6, PRKD3, MAP3K11, CAMK1D, ERBB3, PTPLAD1, STK10, ERBB2, STK17B, EPHB4, NDUFB…	0.00271368	down
GO:0010605	negative regulation of macromolecule metabolic process	80	MEF2C, JDP2, FST, TGFB3, ZEB2, ZEB1, REST, GLI2, CBX5, HOXC8, RAB23, PSMD5, NR2F2, FAM129A, KDM5B, EGR1, ANAPC5, LDB1, ZHX1, IL6R, PKIA, NRIP2, GZF1, HES1, EIF2AK1, MAD2L1, NAB2, HIPK2, MGEA5, LCOR, NSD1, EIF2AK3, EIF2AK4, EID1, FZR1, HMGB2, TIPIN, IGF2BP2, ELK3, CALR, ZNF174, PAIP2B, ITGAV, PER1, PEX14, BCL6, SUPT4H1, SKIL, THBS1, BCOR, TNRC6B, TCF4, BAZ2A, ZNF423, MYF6, TBX3, KLF12, SMAD7, JARI…	0.00275387	down
GO:0045859	regulation of protein kinase activity	43	PDGFB, PTPLAD1, ERBB2, CSF1, TGFB3, ZEB2, LPAR1, CCNG1, PTEN, LATS1, SPRY4, S1PR2, EDNRA, SPRY2, PRKAR2B, SPRY1, APP, CASP3, CXCR4, CDKN2C, SHC1, SPRED1, PPAP2A, THBS1, AGK, MAP2K1, SPHK2, TAOK2, NF1, MET, MALT1, IGF2, PKIA, CISH, ACVR2B, CCND1, CDKN1A, CCND2, RGS4, DGKZ, PRKD3, DUSP6, MAP3K11	0.00322838	down
GO:0008361	regulation of cell size	29	EXTL3, PDGFB, FHL1, TGFB3, PPT1, CCNG1, LUZP6, APP, DAB2, CDKN2C, BCL6, SPP1, ADAM10, ACTA1, CREB1, MAP1B, ADIPOR2, SMAD3, NPR1, IGF2, SOCS5, CSRP2, NOTCH2, PHF17, CDKN1A, ERBB2IP, PRDM4, WHSC1L1, CYFIP1	0.00326532	down
GO:0001822	kidney development	17	NF1, SMAD1, GLI2, GZF1, AGTR1, ACVR2B, SPRY1, GPC3, INVS, CD44, KCNJ8, LAMA5, ALDH1A3, ITGA8, PKD2, PBX1, PCSK5	0.00330601	down
GO:0030201	heparan sulfate proteoglycan metabolic process	6	CSGALNACT1, NDST1, NDST2, SULF1, EXT1, EXT2	0.00332499	down
GO:0045596	negative regulation of cell differentiation	30	LMO2, STAT5A, STAT5B, FST, ZEB1, REST, JAG1, CALR, GLI2, TTC3, PTK2, ITGAV, BCL6, SPP1, ARHGEF1, TBX3, SMAD7, LDB1, NF1, SMAD3, CDK6, SOCS5, NOTCH3, HES1, NOTCH2, CCND1, NOTCH1, HDAC1, PBX1, HDAC7	0.00334432	down
GO:0030203	glycosaminoglycan metabolic process	12	CSGALNACT1, GNS, BGN, XYLT2, NDST1, XYLT1, UGDH, EXT1, EXT2, FUCA1, DSE, CHST1	0.00334524	down
GO:0007265	Ras protein signal transduction	18	RHOJ, ARHGEF1, USP8, MAP2K1, PTPLAD1, NF1, WASF2, YWHAB, MYO9B, ARHGAP29, RFXANK, CDC42EP1, CFL1, RALB, RALA, SHC1, SHC2, DHCR24	0.00342119	down
GO:0014032	neural crest cell development	9	NRP2, EDNRA, SMO, EDNRB, LAMA5, EFNB1, CFL1, SEMA3C, ZEB2	0.00343394	down
GO:0014033	neural crest cell differentiation	9	NRP2, EDNRA, SMO, EDNRB, LAMA5, EFNB1, CFL1, SEMA3C, ZEB2	0.00343394	down
GO:0009725	response to hormone stimulus	45	ARSB, RBP4, HMGB2, LDLR, PDGFB, ERBB3, STAT5A, ERBB2, BCAR1, STAT5B, TGFB3, FOXO1, GNG12, PTEN, LATS1, PHIP, PRKAR2B, BCHE, RARA, GNG2, SHC1, LOX, THBS1, SPP1, TXNIP, MAP2K1, ACTA1, GATM, MAP1B, PTPRA, PRKCI, GGH, ADIPOR2, SOCS7, IGF2, STXBP4, IL6R, LPIN1, PLA2G4A, CCND1, CDKN1A, CCND2, SLC25A36, MGEA5, PARP1	0.00347203	down
GO:0032844	regulation of homeostatic process	19	LMO2, SMAD7, STAT5A, LDB1, NF1, STAT5B, CDK6, FOXO3, ADA, ARNT, EDNRA, AGTR1, PLA2G4A, CD44, ETS1, MGEA5, PKD2, EIF2AK3, SPP1	0.00348872	down
GO:0043549	regulation of kinase activity	44	PDGFB, PTPLAD1, ERBB2, CSF1, TGFB3, ZEB2, LPAR1, CCNG1, PTEN, LATS1, SPRY4, S1PR2, EDNRA, SPRY2, PRKAR2B, SPRY1, APP, CASP3, CXCR4, CDKN2C, SHC1, SPRED1, PPAP2A, THBS1, AGK, MAP2K1, SPHK2, TAOK2, NF1, MET, MALT1, IGF2, VAV2, PKIA, CISH, ACVR2B, CCND1, CDKN1A, CCND2, RGS4, DGKZ, PRKD3, DUSP6, MAP3K11	0.00353	down
GO:0016055	Wnt receptor signaling pathway	21	WNT5A, LZTS2, CCDC88C, RYK, LDB1, TLE3, CTNND1, FZD6, CSNK2A2, DKK3, CCND1, CHD8, DACT1, MACF1, INVS, GSK3B, KREMEN1, SFRP4, LRP6, WNT11, LRP5	0.00383331	down
GO:0006915	apoptosis	67	MEF2C, SGPP1, PREX1, RBM5, GJA1, FOXO3, PTEN, APP, CASP3, CASP9, TIAM2, CXCR4, BAG2, DAP, RNF34, CASP2, TOP2A, LUC7L3, DHCR24, MAGI3, ARHGEF2, NOL3, AIFM1, DFFA, ARHGEF17, STK4, AHR, DDIT4, NME6, RNF130, HIPK2, EIF2AK2, EIF2AK3, NEK6, TRAF1, ERBB3, STK17B, EGLN3, PPT1, ARF6, SCRIB, APLP1, PEA15, PEG10, SQSTM1, THBS1, HIP1, CKAP2, RNF144B, CFLAR, TAOK2, HTT, AIMP2, RYBP, YWHAB, SMAD3, FAM188A, BAD…	0.00390253	down
GO:0007155	cell adhesion	76	NRP2, MTSS1, BCAR1, PCDHGA9, PCDHGA7, FER, MEGF10, PNN, PCDH1, APP, SRPX, CD93, CD44, CHST10, TGFBI, COL12A1, MSN, BOC, PTPRM, MAGI1, INPPL1, EFNB1, PTPRS, ACTN2, CTNNA1, SIRPA, JUP, HES1, AMIGO2, RND3, CLDN1, SGCE, VCAN, ADAM15, AOC3, CTNND1, ARF6, SCRIB, DCHS1, CDH5, APLP1, ALCAM, RGMB, LGALS3BP, COL6A6, ITGAV, PVRL3, PKD2, THBS1, LAMB1, THBS2, THBS3, SPP1, FN1, BMP1, TAOK2, CNKSR3, NID2, EMILI…	0.00395311	down
GO:0022610	biological adhesion	76	NRP2, MTSS1, BCAR1, PCDHGA9, PCDHGA7, FER, MEGF10, PNN, PCDH1, APP, SRPX, CD93, CD44, CHST10, TGFBI, COL12A1, MSN, BOC, PTPRM, MAGI1, INPPL1, EFNB1, PTPRS, ACTN2, CTNNA1, SIRPA, JUP, HES1, AMIGO2, RND3, CLDN1, SGCE, VCAN, ADAM15, AOC3, CTNND1, ARF6, SCRIB, DCHS1, CDH5, APLP1, ALCAM, RGMB, LGALS3BP, COL6A6, ITGAV, PVRL3, PKD2, THBS1, LAMB1, THBS2, THBS3, SPP1, FN1, BMP1, TAOK2, CNKSR3, NID2, EMILI…	0.00403259	down
GO:0000278	mitotic cell cycle	45	FZR1, LZTS2, CETN3, POLA1, TIPIN, RCC1, CCNG1, CCNG2, LATS1, APP, NDE1, NCAPH, CEP250, CDKN2C, KATNA1, CLASP1, PSMD5, ARHGEF2, PDS5B, KIF11, MAP2K1, ANAPC5, CKAP5, PAPD7, CDK6, NDC80, WEE1, SMC3, NCAPD2, CCNB1, CDKN1A, CCND1, MAD2L1, PSMC5, PLK2, CCND2, PSMD10, PRDM5, CDK2AP1, CLIP1, HAUS8, STMN1, KPNA2, NEK6, MAP3K11	0.0040526	down
GO:0001952	regulation of cell-matrix adhesion	8	CSF1, NF1, SMAD3, CDK6, BCL6, THBS1, PTEN, RASA1	0.00408654	down
GO:0046578	regulation of Ras protein signal transduction	29	ARFGAP3, PREX1, ERBB2, CSF1, ITPKB, CYTH2, ARF6, LPAR1, SCRIB, TBC1D16, PLEKHG3, TIAM2, PPP2CB, BCL6, IQSEC1, GIT1, ARHGEF2, ARHGEF1, MAP2K1, NF1, PSD3, ARHGEF17, VAV2, TBC1D22B, NOTCH2, ACAP3, SYDE1, ACAP2, DGKZ	0.0042924	down
GO:0045647	negative regulation of erythrocyte differentiation	4	LMO2, LDB1, STAT5A, STAT5B	0.00434638	down
GO:0048754	branching morphogenesis of a tube	13	EDNRA, SPRY2, NOTCH1, GPC3, TBX3, CD44, CXCR4, LAMA5, PBX1, GLI2, ENG, KDR, GZF1	0.00444534	down
GO:0040008	regulation of growth	42	RBP4, EXTL3, ING3, ING2, STAT5A, BCAR1, CSF1, STAT5B, PPT1, TTL, AGTR1, APP, PTK2, DAB2, GPC3, CD44, HTRA1, CDKN2C, BCL6, SHC1, BRMS1L, SPP1, ADAM10, TAOK2, CREB1, MAP1B, ADIPOR2, SMAD3, SOCS7, NPR1, IGF2, TKT, SOCS5, CISH, VEGFB, UBE2E3, PHF17, BBS2, CDKN1A, PRDM4, PARP1, IGFBP4	0.00446582	down
GO:0051338	regulation of transferase activity	45	PDGFB, PTPLAD1, ERBB2, CSF1, TGFB3, ZEB2, LPAR1, CCNG1, PTEN, LATS1, SPRY4, S1PR2, EDNRA, SPRY2, PRKAR2B, SPRY1, SERINC5, APP, CASP3, CXCR4, CDKN2C, SHC1, SPRED1, PPAP2A, THBS1, AGK, MAP2K1, SPHK2, TAOK2, NF1, MET, MALT1, IGF2, VAV2, PKIA, CISH, ACVR2B, CCND1, CDKN1A, CCND2, RGS4, DGKZ, PRKD3, DUSP6, MAP3K11	0.00449954	down
GO:0043009	chordate embryonic development	41	ZFAND5, RBP4, NDST1, TGFB3, PRRX1, ZEB2, PRRX2, ZEB1, GLI2, ADA, ARNT, EDNRA, RPA1, CHD8, DAB2, HOXA6, PKD2, PCSK5, MYF6, ADAM10, TBX3, HTT, NASP, TAF8, SMAD2, VASP, RIC8A, FZD6, HES1, SMO, MAN2A1, TULP3, MEOX2, PLCG1, SP3, GFPT1, CFL1, PBX1, IFT52, POFUT1, MYH10	0.00452315	down
GO:0006024	glycosaminoglycan biosynthetic process	7	CSGALNACT1, XYLT2, XYLT1, UGDH, EXT1, EXT2, DSE	0.00461258	down
GO:0006886	intracellular protein transport	45	XPO1, ARFGAP3, YWHAZ, PDIA3, AP1G1, TGFB3, AKAP12, CTSA, MIPEP, CALR, SEC62, SSR1, AP2B1, AP1S2, MACF1, TRAK2, AP3M1, PEX14, BCL6, TLK1, APPBP2, TNPO1, SEC24D, SEC23A, STX6, ARHGEF2, TAOK2, HTT, IPO13, IPO11, YWHAB, PRKCI, VPS41, STXBP4, TIMM44, PPIH, ERBB2IP, GSK3B, YWHAQ, MGEA5, PCNA, PTTG1IP, KPNA2, KPNA1, RERE	0.00486033	down
GO:0051270	regulation of cell motion	27	PDGFB, CSF1, BCAR1, STAT5B, JAG1, PTEN, ADA, CXCR4, ROBO4, BCL6, TIE1, THBS1, LAMB1, PTPRM, ADAM10, MAP2K1, SMAD7, NF1, SMAD3, IGF2, IL6R, KDR, BBS2, LAMA4, LAMA5, ETS1, HDAC7	0.00504832	down
GO:0048812	neuron projection morphogenesis	29	NRP2, RTN4RL1, ERBB3, ERBB2, GJA1, PIP5K1C, GLI2, ALCAM, APP, PTK2, MACF1, CXCR4, SEMA3B, ACTB, PTPRM, MAP2K1, RYK, CREB1, EFNB1, MAP1B, GAS7, VASP, SEMA6A, SMO, NOTCH1, CYFIP1, VCAN, FEZ2, MYH10	0.00523033	down
GO:0009792	embryonic development ending in birth or egg hatching	41	ZFAND5, RBP4, NDST1, TGFB3, PRRX1, ZEB2, PRRX2, ZEB1, GLI2, ADA, ARNT, EDNRA, RPA1, CHD8, DAB2, HOXA6, PKD2, PCSK5, MYF6, ADAM10, TBX3, HTT, NASP, TAF8, SMAD2, VASP, RIC8A, FZD6, HES1, SMO, MAN2A1, TULP3, MEOX2, PLCG1, SP3, GFPT1, CFL1, PBX1, IFT52, POFUT1, MYH10	0.00527953	down
GO:0012501	programmed cell death	67	MEF2C, SGPP1, PREX1, RBM5, GJA1, FOXO3, PTEN, APP, CASP3, CASP9, TIAM2, CXCR4, BAG2, DAP, RNF34, CASP2, TOP2A, LUC7L3, DHCR24, MAGI3, ARHGEF2, NOL3, AIFM1, DFFA, ARHGEF17, STK4, AHR, DDIT4, NME6, RNF130, HIPK2, EIF2AK2, EIF2AK3, NEK6, TRAF1, ERBB3, STK17B, EGLN3, PPT1, ARF6, SCRIB, APLP1, PEA15, PEG10, SQSTM1, THBS1, HIP1, CKAP2, RNF144B, CFLAR, TAOK2, HTT, AIMP2, RYBP, YWHAB, SMAD3, FAM188A, BAD…	0.00543367	down
GO:0051173	positive regulation of nitrogen compound metabolic process	70	MEF2C, PDGFB, STAT5A, STAT5B, TGFB3, FOXO1, ZEB1, FOXO3, GLI2, APP, SMARCD1, SHC1, NR2F2, EGR1, RXRG, AHR, EYA3, HES1, NCOA1, HIPK2, MGEA5, CAND1, PIAS2, PIAS1, NSD1, CAMTA2, HMGB2, ING2, ABLIM3, AFAP1L2, CALR, ARNT, CHD8, RGMB, SQSTM1, RNF168, MYOG, SUPT4H1, NFATC2, TCF4, ZNF423, MYF6, KLF5, TBX3, MAP2K1, KLF12, VHL, TAF8, CREB1, TP53BP1, SMAD5, SMAD3, NPR1, SMAD2, CREB5, TEAD2, IGF2, TRIM24, SM…	0.00552404	down
GO:0001655	urogenital system development	18	RBP4, NF1, SMAD1, GLI2, GZF1, AGTR1, ACVR2B, SPRY1, GPC3, INVS, CD44, KCNJ8, LAMA5, ALDH1A3, ITGA8, PKD2, PBX1, PCSK5	0.00555929	down
GO:0007264	small GTPase mediated signal transduction	38	RHOJ, USP8, PTPLAD1, WASF2, ARF6, MYO9B, RFXANK, RGL1, CDC42EP1, RALB, RHOBTB2, RAB23, RALA, RHOC, SHC1, SHC2, DHCR24, RAP2A, RAB2B, RAP2C, RAB8B, ARHGEF1, MAP2K1, NF1, YWHAB, RGS19, ARHGAP29, VAV2, RAB33B, SH2D3C, RND3, ARF4, RAB34, RAB22A, CFL1, YWHAQ, RIN2, RIT1	0.00579174	down
GO:0043244	regulation of protein complex disassembly	11	TRIOBP, ARHGEF2, LIMA1, MAP1A, SCIN, CFL1, MAP1B, MGEA5, CLASP1, SPTAN1, DSTN	0.00584825	down
GO:0009967	positive regulation of signal transduction	37	ING2, SLC44A2, ERBB3, CSF1, ERBB2, TGFB3, PRRX1, TSPAN6, GJA1, AFAP1L2, ZEB2, ITPKB, PRRX2, JAG1, LPAR1, ADA, ARNT, GPC3, TICAM2, RHOC, THBS1, CFLAR, TAOK2, ADAMTS20, TAOK3, MALT1, IGF2, WLS, IL6R, NOTCH2, ACVR2B, PLK2, ITGA8, MIB2, HIPK2, ENG, NEK6	0.00587423	down
GO:0010604	positive regulation of macromolecule metabolic process	89	MEF2C, PDGFB, STAT5A, STAT5B, TGFB3, FOXO1, GJA1, ZEB1, FOXO3, GLI2, EDNRA, EDNRB, AGTR1, APP, SMARCD1, SHC1, PSMD5, NR2F2, FAM129A, EGR1, ANAPC5, RXRG, IL6R, AHR, EYA3, HES1, CCND1, NCOA1, CCND2, HIPK2, MGEA5, CAND1, PIAS2, PIAS1, NSD1, CAMTA2, FZR1, HMGB2, ING2, ABLIM3, CSF1, AFAP1L2, CALR, SCRIB, ARNT, RGMB, CHD8, SQSTM1, RNF168, MYOG, SUPT4H1, THBS1, TCF4, NFATC2, ZNF423, MYF6, KLF5, KLF12, T…	0.00595992	down
GO:0046907	intracellular transport	71	ARSB, XPO1, SEC31A, ATL2, PDIA3, AP1G1, WASF2, USE1, TGFB3, MIPEP, SSR1, NDE1, AP2B1, APP, AP1S2, TRAK2, ANP32A, TLK1, SEC24D, STX6, SEC23A, ARHGEF2, MYH3, PRKCI, VPS41, STXBP4, TIMM44, ERGIC1, ANKRD27, NPC2, AAAS, MGEA5, CAMK1, KPNA2, KPNA1, ARFGAP3, YWHAZ, AKAP12, EEA1, MYO9B, CTSA, CALR, SEC62, MACF1, AP3M1, SQSTM1, PEX14, BCL6, SNAP23, APPBP2, TNPO1, MAP2K1, TAOK2, HTT, IPO13, IPO11, YWHAB, M…	0.00597318	down
GO:0048858	cell projection morphogenesis	32	NRP2, RTN4RL1, ERBB3, ERBB2, PIP5K1C, GJA1, GLI2, ALCAM, APP, PTK2, MACF1, CXCR4, SEMA3B, ACTB, PTPRM, MAP2K1, RYK, CREB1, EFNB1, MAP1B, PCM1, GAS7, VASP, SMO, BBS2, SEMA6A, NOTCH1, LAMA5, CYFIP1, VCAN, FEZ2, MYH10	0.00602674	down
GO:0031175	neuron projection development	33	NRP2, RTN4RL1, ERBB3, ERBB2, GJA1, PIP5K1C, GLI2, PTEN, ALCAM, APP, PTK2, MACF1, CD44, CXCR4, ATXN10, SEMA3B, LAMB1, ACTB, PTPRM, MAP2K1, RYK, CREB1, EFNB1, MAP1B, GAS7, VASP, SMO, SEMA6A, NOTCH1, CYFIP1, VCAN, FEZ2, MYH10	0.00637443	down
GO:0032869	cellular response to insulin stimulus	13	PHIP, CCND2, ERBB3, BCAR1, PTPRA, PRKCI, SOCS7, FOXO1, IGF2, SHC1, STXBP4, PARP1, LPIN1	0.0064645	down
GO:0003002	regionalization	27	TSHZ1, ZEB2, GLI2, HOXC8, HOXA6, RAB23, NR2F2, PCSK5, MLLT3, MYF6, TBX3, HTT, LDB1, SMAD2, HES1, SMO, ACVR2B, NOTCH1, TULP3, MEOX2, HIPK2, LRP6, PBX1, IFT52, POFUT1, PBX2, LRP5	0.00660505	down
GO:0055002	striated muscle cell development	11	APP, ACTA1, XIRP1, ERBB2, UTRN, MYOZ1, MYOG, CHRNB1, MYH10, SNTA1, TMOD1	0.00674105	down
GO:0009952	anterior/posterior pattern formation	21	MYF6, TSHZ1, TBX3, HTT, LDB1, ZEB2, SMAD2, HES1, ACVR2B, HOXC8, NOTCH1, MEOX2, HOXA6, HIPK2, LRP6, PBX1, NR2F2, POFUT1, PCSK5, MLLT3, LRP5	0.00685827	down
GO:0008283	cell proliferation	50	XRCC5, PDGFB, BCAR1, FST, ZEB2, TXLNA, ENPEP, ZEB1, FES, GLI2, PTEN, EDNRA, NDE1, DAB2, CXCR4, TGFBI, GNG2, ARHGEF1, PRKD1, VEGFB, IFNAR2, GLUL, PRDM4, NAB2, MAP3K11, RBP4, USP8, ERBB2, CSF1, POLA1, EPHB4, NAA35, SCRIB, PDS5B, MAP2K1, SPHK2, MKI67, TAF8, NASP, MET, TRIM27, MALT1, BAD, CSRP2, CSGALNACT1, FYN, LAMA5, PCNA, IGFBP4, MYH10	0.00747447	down
GO:0006023	aminoglycan biosynthetic process	7	CSGALNACT1, XYLT2, XYLT1, UGDH, EXT1, EXT2, DSE	0.00749102	down
GO:0009719	response to endogenous stimulus	47	ARSB, RBP4, HMGB2, LDLR, PDGFB, ERBB3, STAT5A, ERBB2, BCAR1, STAT5B, TGFB3, FOXO1, GNG12, PTEN, LATS1, PHIP, PRKAR2B, BCHE, RARA, GNG2, SHC1, LOX, THBS1, SPP1, TXNIP, MAP2K1, ACTA1, GATM, MAP1B, PTPRA, PRKCI, ADIPOR2, GGH, SOCS7, IGF2, SMAD1, STXBP4, IL6R, LPIN1, PLA2G4A, CCND1, CDKN1A, CCND2, SLC25A36, CFL1, MGEA5, PARP1	0.00778166	down
GO:0007049	cell cycle	81	LZTS2, SPIN1, SENP5, LATS1, NDE1, APP, CEP250, CDKN2C, PCBP4, TLK1, PSMD5, DHCR24, ESCO1, ARHGEF2, KIF11, ANAPC5, PAPD7, HMG20B, CDK6, MCM3, WEE1, AHR, TACC1, NCAPD2, CCND1, MAD2L1, MAPK6, CCND2, PRDM5, CDK2AP1, CLIP1, STMN1, HAUS8, KPNA2, NEK6, MAP3K11, EID1, FZR1, CETN3, TIPIN, POLA1, CALR, RCC1, CCNG1, SESN1, CCNG2, SESN3, MLF1, RPA1, NCAPH, MACF1, KATNA1, PKD2, CLASP1, THBS1, CKAP2, TXNIP, ER…	0.0078966	down
GO:0048589	developmental growth	15	MYF6, GATM, TAF8, FOXO3, GLI2, LUZP6, CCNB1, NOTCH3, NOTCH2, SMO, NOTCH1, APP, CYFIP1, CHRND, PLAU	0.00792162	down
GO:0015012	heparan sulfate proteoglycan biosynthetic process	5	CSGALNACT1, NDST1, NDST2, EXT1, EXT2	0.00812278	down
GO:0032870	cellular response to hormone stimulus	20	ERBB3, STAT5A, BCAR1, PTPRA, STAT5B, ADIPOR2, PRKCI, SOCS7, FOXO1, IGF2, STXBP4, GNG12, LPIN1, LATS1, PHIP, PRKAR2B, CCND2, SHC1, GNG2, PARP1	0.00827242	down
GO:0048568	embryonic organ development	24	RBP4, TSHZ1, LMO2, NDST1, PRRX1, TGFB3, ZEB1, PRRX2, GLI2, ZIC1, ADA, ARNT, FZD6, SPRY2, TULP3, HOXA6, ALDH1A3, SP3, ITGA8, GFPT1, PKD2, SH2B3, PBX1, PCSK5	0.0087688	down
GO:0042476	odontogenesis	11	SMO, ACVR2B, ITGA6, ERBB3, LAMA5, CSF1, FST, TGFB3, BCOR, LAMB1, GLI2	0.00884026	down
GO:0010628	positive regulation of gene expression	63	MEF2C, STAT5A, STAT5B, TGFB3, FOXO1, FOXO3, ZEB1, GLI2, APP, SMARCD1, NR2F2, EGR1, RXRG, AHR, HES1, NCOA1, HIPK2, PIAS2, CAND1, PIAS1, NSD1, CAMTA2, HMGB2, ING2, ABLIM3, CSF1, AFAP1L2, ARNT, CHD8, RGMB, SQSTM1, MYOG, SUPT4H1, NFATC2, TCF4, ZNF423, MYF6, KLF5, TBX3, KLF12, VHL, TAF8, CREB1, TP53BP1, SMAD5, SMAD3, CREB5, TEAD2, SMAD2, TRIM24, SMAD1, NOTCH1, PSMC5, HDAC1, ETS1, EBF2, ETS2, EBF1, DNM…	0.00900635	down
GO:0005996	monosaccharide metabolic process	29	RBP4, ADPGK, PFKFB3, UGDH, NAGK, GALK1, TROVE2, GALM, PPP1R3B, PDHA1, GPD2, GPD1, PDK4, CHST2, IGF2, PFKM, BAD, FUCA1, CHST1, PGM2, CSGALNACT1, GPI, MAN2A1, PGLS, GSK3B, GFPT1, MGEA5, POFUT2, POFUT1	0.00912457	down
GO:0051276	chromosome organization	54	XRCC5, HP1BP3, ARID4B, CBX1, LATS1, CBX5, SMARCD1, TLK1, HIRIP3, KDM5B, TOP2A, AIFM1, RCOR1, PAPD7, HMG20A, HMG20B, NCAPD2, EYA3, MAD2L1, TAF12, RFC1, PRDM5, JMJD1C, NSD1, HMGB2, ING3, ING2, TADA3, TSPYL4, ARID2, RPA1, CHD9, CHD8, NCAPH, LEO1, RNF168, SUPT4H1, CHD6, BCOR, BAZ2A, CHD3, PDS5B, NASP, NDC80, SMC3, PHF17, HDAC1, MSL1, WHSC1L1, DNMT1, SETD7, PARP1, HDAC7, RERE	0.00958611	down
GO:0006508	proteolysis	105	THOP1, PPP2R5C, ENPEP, MIPEP, MMP2, CUL7, HTRA1, FAP, RNF34, ANAPC5, ADAMTS20, UBR3, SOCS7, SOCS5, ADAMTS9, MAD2L1, CPE, MIB2, DLD, BACE1, FBXL7, PIAS2, PIAS1, ASB2, CPD, ASB5, ADAMTS2, FZR1, FOLH1B, UBA6, MME, CTSA, UBAC1, PEG10, RNF168, PLAT, CFLAR, BMP1, UBE2L6, MALT1, TINAGL1, TRIM63, ATE1, UBE2E3, TULP4, PSMC5, FBXO30, FBXO31, FBXO32, SMURF2, FBXO34, PLAU, SENP5, SENP6, FANCL, DDI2, CASP3, C…	0.00960298	down
GO:0007160	cell-matrix adhesion	15	TAOK2, ACTN2, NID2, ECM2, RAPH1, CD44, ITGA6, LAMA5, ITGAV, ITGA8, PKD2, SGCE, THBS3, ADAM15, FN1	0.00965851	down
GO:0031589	cell-substrate adhesion	16	TAOK2, ACTN2, NID2, ECM2, RAPH1, CD44, ITGA6, LAMA5, ITGAV, ITGA8, PKD2, SGCE, LAMB1, THBS3, ADAM15, FN1	0.00968599	down
GO:0034613	cellular protein localization	47	XPO1, YWHAZ, ARFGAP3, PDIA3, AP1G1, TGFB3, AKAP12, CTSA, MIPEP, CALR, SEC62, SSR1, AP2B1, AP1S2, MACF1, TRAK2, AP3M1, PEX14, BCL6, TLK1, APPBP2, TNPO1, SEC24D, SEC23A, STX6, ARHGEF2, TAOK2, HTT, IPO13, IPO11, YWHAB, PRKCI, VPS41, STXBP4, TIMM44, BBS2, PPIH, ERBB2IP, ID1, GSK3B, YWHAQ, MGEA5, PCNA, PTTG1IP, KPNA2, RERE, KPNA1	0.00989706	down
GO:0045941	positive regulation of transcription	61	MEF2C, STAT5A, STAT5B, TGFB3, FOXO1, FOXO3, ZEB1, GLI2, APP, SMARCD1, NR2F2, EGR1, RXRG, AHR, HES1, NCOA1, HIPK2, PIAS2, CAND1, PIAS1, NSD1, CAMTA2, HMGB2, ING2, ABLIM3, AFAP1L2, ARNT, CHD8, RGMB, SQSTM1, MYOG, SUPT4H1, NFATC2, TCF4, ZNF423, KLF5, MYF6, TBX3, KLF12, VHL, TAF8, CREB1, TP53BP1, SMAD5, SMAD3, CREB5, TEAD2, SMAD2, TRIM24, SMAD1, NOTCH1, PSMC5, HDAC1, ETS1, EBF2, ETS2, EBF1, PBX1, PBX…	0.0104667	down
GO:0035239	tube morphogenesis	19	TBX3, ZEB2, GLI2, SCRIB, VASP, FZD6, GZF1, KDR, EDNRA, SPRY2, NOTCH1, GPC3, CD44, CXCR4, LAMA5, CFL1, PBX1, IFT52, ENG	0.0108049	down
GO:0048701	embryonic cranial skeleton morphogenesis	6	TULP3, NDST1, GFPT1, PRRX1, TGFB3, PRRX2	0.0109187	down
GO:0042246	tissue regeneration	8	NOTCH3, CCNB1, MYF6, NOTCH2, NOTCH1, GATM, PLAU, LUZP6	0.0109662	down
GO:0032990	cell part morphogenesis	32	NRP2, RTN4RL1, ERBB3, ERBB2, PIP5K1C, GJA1, GLI2, ALCAM, APP, PTK2, MACF1, CXCR4, SEMA3B, ACTB, PTPRM, MAP2K1, RYK, CREB1, EFNB1, MAP1B, PCM1, GAS7, VASP, SMO, BBS2, SEMA6A, NOTCH1, LAMA5, CYFIP1, VCAN, FEZ2, MYH10	0.0111565	down
GO:0055001	muscle cell development	11	APP, ACTA1, XIRP1, ERBB2, UTRN, MYOZ1, MYOG, CHRNB1, MYH10, SNTA1, TMOD1	0.0114067	down
GO:0042733	embryonic digit morphogenesis	7	TULP3, GNAQ, TBX3, LRP6, RAB23, IFT52, LRP5	0.0114791	down
GO:0070727	cellular macromolecule localization	47	XPO1, YWHAZ, ARFGAP3, PDIA3, AP1G1, TGFB3, AKAP12, CTSA, MIPEP, CALR, SEC62, SSR1, AP2B1, AP1S2, MACF1, TRAK2, AP3M1, PEX14, BCL6, TLK1, APPBP2, TNPO1, SEC24D, SEC23A, STX6, ARHGEF2, TAOK2, HTT, IPO13, IPO11, YWHAB, PRKCI, VPS41, STXBP4, TIMM44, BBS2, PPIH, ERBB2IP, ID1, GSK3B, YWHAQ, MGEA5, PCNA, PTTG1IP, KPNA2, RERE, KPNA1	0.0115553	down
GO:0006022	aminoglycan metabolic process	12	CSGALNACT1, GNS, BGN, XYLT2, NDST1, XYLT1, UGDH, EXT1, EXT2, FUCA1, DSE, CHST1	0.0121797	down
GO:0033043	regulation of organelle organization	28	XPO1, TRIOBP, LIMA1, ARF6, ARPC5, RCC1, LATS1, DSTN, CUL7, MACF1, CEP250, TLK1, CLASP1, RASA1, CDK13, ARHGEF2, MAP1A, MAP1B, SMAD3, TMSB10, IGF2, PLA2G4A, MAD2L1, SCIN, CFL1, DNMT1, NEK6, SPTAN1	0.012239	down
GO:0051254	positive regulation of RNA metabolic process	53	MEF2C, STAT5A, STAT5B, TGFB3, FOXO1, FOXO3, ZEB1, GLI2, APP, SMARCD1, NR2F2, EGR1, RXRG, AHR, HES1, NCOA1, HIPK2, PIAS2, CAND1, PIAS1, NSD1, HMGB2, CAMTA2, ABLIM3, AFAP1L2, ARNT, CHD8, SQSTM1, MYOG, SUPT4H1, NFATC2, TCF4, TBX3, MAP2K1, KLF12, CREB1, TP53BP1, TAF8, SMAD5, SMAD3, CREB5, TEAD2, SMAD2, SMAD1, NOTCH1, PSMC5, HDAC1, ETS1, ETS2, PBX1, ENG, PBX2, NFIB	0.0124122	down
GO:0001763	morphogenesis of a branching structure	13	EDNRA, SPRY2, NOTCH1, GPC3, TBX3, CD44, CXCR4, LAMA5, PBX1, GLI2, ENG, KDR, GZF1	0.0126234	down
GO:0007498	mesoderm development	13	TBX3, HTT, SMAD3, SMAD2, SMAD1, SNAI2, ECSIT, ACVR2B, MACF1, TIE1, EXT1, EXT2, MEST	0.0126234	down
GO:0009101	glycoprotein biosynthetic process	22	MGAT4B, OSTC, GALNT1, MAN1A2, B3GALT2, NDST1, LDLR, NDST2, FUT11, TSPAN7, DSE, CSGALNACT1, B3GNT9, MAN2A1, ST6GALNAC6, GALNT10, TRAK2, ST3GAL4, ST8SIA4, EXT1, POFUT1, EXT2	0.0127013	down
GO:0007611	learning or memory	17	EGR1, HTT, NF1, ATP1A2, PTEN, VDAC3, VDAC1, RIC8A, PRKAR2B, APP, AAAS, CHST10, BCHE, FYN, ITGA5, ITGA8, PTN	0.013465	down
GO:0007519	skeletal muscle tissue development	12	MYF6, APP, ACTA1, MEOX2, ERBB3, ERBB2, UTRN, RXRG, CHRND, MYOG, NR2F2, SNTA1	0.0136051	down
GO:0060538	skeletal muscle organ development	12	MYF6, APP, ACTA1, MEOX2, ERBB3, ERBB2, UTRN, RXRG, CHRND, MYOG, NR2F2, SNTA1	0.0136051	down
GO:0030334	regulation of cell migration	23	ADAM10, PTPRM, MAP2K1, PDGFB, SMAD7, CSF1, BCAR1, NF1, SMAD3, IGF2, IL6R, JAG1, PTEN, ADA, KDR, LAMA4, CXCR4, LAMA5, ROBO4, TIE1, LAMB1, THBS1, HDAC7	0.013743	down
GO:0007224	smoothened signaling pathway	6	SMO, NDST1, CDON, HIPK2, IFT52, GLI2	0.0138742	down
GO:0048008	platelet-derived growth factor receptor signaling pathway	6	PLAT, TXNIP, ZFAND5, PDGFB, BCAR1, PTEN	0.0138742	down
GO:0042692	muscle cell differentiation	18	ACADM, ACTA1, ERBB2, UTRN, MYEF2, MYOZ1, JAG1, CSRP2, LUZP6, APP, XIRP1, CDON, MYOG, CHRNB1, IFRD1, MYH10, SNTA1, TMOD1	0.0141143	down
GO:0015031	protein transport	78	XPO1, SEC31A, PDIA3, AP1G1, VPS52, USE1, TGFB3, PDIA4, MIPEP, SSR1, AP2B1, AP1S2, TRAK2, RANBP6, NECAP2, RAB23, TLK1, SEC24D, STX6, SEC23A, KDELR3, ARHGEF2, PRKCI, VPS41, STXBP4, TIMM44, RAB11FIP2, MGEA5, KPNA2, KPNA1, FRAS1, SNX18, ARFGAP3, YWHAZ, AKAP12, NUP93, PPT1, SNX4, CTSA, ARF6, CALR, SEC62, MACF1, AP3M1, TMED3, PEX14, BCL6, SNAP23, APPBP2, PCSK5, TNPO1, EXOC2, RAB2B, RAB8B, MYO1C, TAOK2,…	0.014146	down
GO:0051347	positive regulation of transferase activity	30	PDGFB, PTPLAD1, ERBB2, CSF1, TGFB3, ZEB2, LPAR1, EDNRA, S1PR2, PRKAR2B, SERINC5, CXCR4, SHC1, PPAP2A, THBS1, AGK, TAOK2, SPHK2, MAP2K1, MET, MALT1, IGF2, VAV2, CISH, ACVR2B, CCND1, CCND2, DGKZ, PRKD3, MAP3K11	0.0141586	down
GO:0000280	nuclear division	28	LZTS2, FZR1, CETN3, TIPIN, RCC1, CCNG1, LATS1, CCNG2, NDE1, NCAPH, KATNA1, CLASP1, ARHGEF2, KIF11, PDS5B, MAP2K1, ANAPC5, CKAP5, PAPD7, NDC80, SMC3, WEE1, NCAPD2, CCNB1, MAD2L1, CLIP1, HAUS8, NEK6	0.014489	down
GO:0007067	mitosis	28	LZTS2, FZR1, CETN3, TIPIN, RCC1, CCNG1, LATS1, CCNG2, NDE1, NCAPH, KATNA1, CLASP1, ARHGEF2, KIF11, PDS5B, MAP2K1, ANAPC5, CKAP5, PAPD7, NDC80, SMC3, WEE1, NCAPD2, CCNB1, MAD2L1, CLIP1, HAUS8, NEK6	0.014489	down
GO:0043405	regulation of MAP kinase activity	20	MAP2K1, PDGFB, PTPLAD1, ERBB2, NF1, MET, TGFB3, ZEB2, LPAR1, SPRY4, S1PR2, SPRY2, SPRY1, CXCR4, RGS4, SHC1, SPRED1, THBS1, DUSP6, MAP3K11	0.0150157	down
GO:0008219	cell death	74	MEF2C, SGPP1, PREX1, RBM5, GJA1, FOXO3, PTEN, CASP3, APP, CASP9, TIAM2, ATXN10, CXCR4, BAG2, SPG20, SPG21, DAP, RNF34, CASP2, TOP2A, LUC7L3, DHCR24, MAGI3, ARHGEF2, NOL3, DFFA, AIFM1, ARHGEF17, STK4, AHR, DDIT4, NME6, RNF130, HIPK2, MGEA5, EIF2AK2, EIF2AK3, NEK6, MAP3K11, TRAF1, ERBB3, STK17B, EGLN3, MMD, PPT1, ARF6, SCRIB, APLP1, PEA15, PEG10, SQSTM1, THBS1, HIP1, CKAP2, RNF144B, CFLAR, TAOK2, H…	0.0151169	down
GO:0033674	positive regulation of kinase activity	29	PDGFB, PTPLAD1, ERBB2, CSF1, TGFB3, ZEB2, LPAR1, EDNRA, S1PR2, PRKAR2B, CXCR4, SHC1, THBS1, PPAP2A, AGK, TAOK2, SPHK2, MAP2K1, MET, MALT1, IGF2, VAV2, CISH, ACVR2B, CCND1, CCND2, DGKZ, PRKD3, MAP3K11	0.0151301	down
GO:0009968	negative regulation of signal transduction	28	ERBB3, TGFB3, CALR, PTEN, ADA, CHD8, PEG10, HTRA1, PPP2CB, BCL6, SKIL, THBS1, SMAD7, NF1, TAOK3, SOCS7, RGS19, SOCS5, CISH, DDIT4, DKK3, CCND1, TULP3, RGS4, HIPK2, LRP6, DGKZ, ENG	0.0153086	down
GO:0051056	regulation of small GTPase mediated signal transduction	31	ARFGAP3, PREX1, ERBB2, CSF1, ARF6, ITPKB, CYTH2, LPAR1, RGL1, SCRIB, TBC1D16, PLEKHG3, TIAM2, PPP2CB, BCL6, IQSEC1, RASA1, GIT1, ARHGEF2, ARHGEF1, MAP2K1, NF1, PSD3, ARHGEF17, VAV2, TBC1D22B, NOTCH2, ACAP3, SYDE1, ACAP2, DGKZ	0.0154699	down
GO:0046777	protein amino acid autophosphorylation	14	ERBB2, MET, TAOK3, TRIM24, FER, STK4, PTK2, EIF2AK1, FYN, NTRK2, YES1, EIF2AK2, EIF2AK3, MAP3K11	0.0154814	down
GO:0051130	positive regulation of cellular component organization	24	ARHGEF1, PLXNB2, MAP1B, PRKCI, TGFB3, SMAD3, ARF6, IGF2, SMAD2, PPT1, SMAD1, CALR, LDLRAP1, AHR, DSTN, PLA2G4A, CDC42EP1, GSK3B, CFL1, MGEA5, DNMT1, RALA, CAND1, HIP1	0.015648	down
GO:0045893	positive regulation of transcription, DNA-dependent	52	MEF2C, STAT5A, STAT5B, TGFB3, FOXO1, FOXO3, ZEB1, GLI2, APP, SMARCD1, NR2F2, EGR1, RXRG, AHR, HES1, NCOA1, HIPK2, PIAS2, CAND1, PIAS1, NSD1, HMGB2, CAMTA2, ABLIM3, AFAP1L2, ARNT, CHD8, SQSTM1, MYOG, SUPT4H1, NFATC2, TCF4, TBX3, KLF12, CREB1, TP53BP1, TAF8, SMAD5, SMAD3, CREB5, TEAD2, SMAD2, SMAD1, NOTCH1, PSMC5, HDAC1, ETS1, ETS2, PBX1, ENG, PBX2, NFIB	0.0157026	down
GO:0030900	forebrain development	21	NDST1, TBX3, HTT, CREB1, NF1, ZEB2, GLI2, APLP1, NOTCH3, HES1, ATRX, BBS2, NDE1, NOTCH1, APP, GNAQ, FYN, ALDH1A3, NR2F2, MYH10, NFIB	0.0163572	down
GO:0016568	chromatin modification	33	ING3, ING2, TADA3, ARID2, CHD9, CHD8, SMARCD1, LEO1, TLK1, RNF168, SUPT4H1, CHD6, BCOR, BAZ2A, KDM5B, CHD3, NASP, RCOR1, HMG20A, HMG20B, EYA3, PHF17, TAF12, HDAC1, MSL1, WHSC1L1, PRDM5, SETD7, DNMT1, JMJD1C, NSD1, RERE, HDAC7	0.0164363	down
GO:0019318	hexose metabolic process	25	GPD2, GPD1, RBP4, PFKFB3, ADPGK, PDK4, UGDH, IGF2, BAD, PFKM, FUCA1, CHST1, PGM2, GALK1, MAN2A1, GPI, PGLS, GALM, TROVE2, PPP1R3B, GSK3B, GFPT1, POFUT2, PDHA1, POFUT1	0.0165766	down
GO:0008104	protein localization	88	XPO1, SEC31A, PDIA3, AP1G1, VPS52, USE1, TGFB3, PDIA4, MIPEP, SSR1, AP2B1, AP1S2, CEP250, TRAK2, RANBP6, NECAP2, RAB23, TLK1, SEC24D, DHCR24, STX6, SEC23A, KDELR3, ARHGEF2, PRKCI, TMSB10, VPS41, STXBP4, TIMM44, FLNB, BBS2, RAB11FIP2, MGEA5, KPNA2, KPNA1, FRAS1, SNX18, ARFGAP3, YWHAZ, AKAP12, NUP93, PPT1, SNX4, CTSA, AKAP10, ARF6, CALR, SEC62, MACF1, AP3M1, TMED3, SQSTM1, KATNA1, PEX14, BCL6, SNAP…	0.016885	down
GO:0007243	protein kinase cascade	42	WNT5A, NDST1, ERBB3, PTPLAD1, THOP1, STAT5A, ERBB2, STAT5B, STK17B, TGFB3, ITPKB, LPAR1, PRKCSH, S1PR2, CXCR4, TICAM2, PKD2, SHC1, SPRED1, THBS1, SRPK2, IKBKAP, MAP2K1, TAOK2, NF1, TAOK3, MET, MALT1, IGF2, SMAD1, STK4, SRPK1, MAP4K3, IFNAR2, SS18, SH2D3C, ICK, FYN, RGS4, PIAS1, DUSP6, MAP3K11	0.0169584	down
GO:0016265	death	74	MEF2C, SGPP1, PREX1, RBM5, GJA1, FOXO3, PTEN, CASP3, APP, CASP9, TIAM2, ATXN10, CXCR4, BAG2, SPG20, SPG21, DAP, RNF34, CASP2, TOP2A, LUC7L3, DHCR24, MAGI3, ARHGEF2, NOL3, DFFA, AIFM1, ARHGEF17, STK4, AHR, DDIT4, NME6, RNF130, HIPK2, MGEA5, EIF2AK2, EIF2AK3, NEK6, MAP3K11, TRAF1, ERBB3, STK17B, EGLN3, MMD, PPT1, ARF6, SCRIB, APLP1, PEA15, PEG10, SQSTM1, THBS1, HIP1, CKAP2, RNF144B, CFLAR, TAOK2, H…	0.0170516	down
GO:0045860	positive regulation of protein kinase activity	28	PDGFB, PTPLAD1, ERBB2, CSF1, TGFB3, ZEB2, LPAR1, EDNRA, S1PR2, PRKAR2B, CXCR4, SHC1, THBS1, PPAP2A, AGK, TAOK2, SPHK2, MAP2K1, MET, MALT1, IGF2, CISH, ACVR2B, CCND1, CCND2, DGKZ, PRKD3, MAP3K11	0.0170588	down
GO:0048762	mesenchymal cell differentiation	10	NRP2, EDNRA, SMO, EDNRB, NOTCH1, LAMA5, EFNB1, CFL1, SEMA3C, ZEB2	0.0172101	down
GO:0014031	mesenchymal cell development	10	NRP2, EDNRA, SMO, EDNRB, NOTCH1, LAMA5, EFNB1, CFL1, SEMA3C, ZEB2	0.0172101	down
GO:0045580	regulation of T cell differentiation	10	ERBB2, STAT5A, STAT5B, RARA, ITPKB, BCL6, SOCS5, BAD, ZEB1, ADA	0.0172101	down
GO:0045184	establishment of protein localization	78	XPO1, SEC31A, PDIA3, AP1G1, VPS52, USE1, TGFB3, PDIA4, MIPEP, SSR1, AP2B1, AP1S2, TRAK2, RANBP6, NECAP2, RAB23, TLK1, SEC24D, STX6, SEC23A, KDELR3, ARHGEF2, PRKCI, VPS41, STXBP4, TIMM44, RAB11FIP2, MGEA5, KPNA2, KPNA1, FRAS1, SNX18, ARFGAP3, YWHAZ, AKAP12, NUP93, PPT1, SNX4, CTSA, ARF6, CALR, SEC62, MACF1, AP3M1, TMED3, PEX14, BCL6, SNAP23, APPBP2, PCSK5, TNPO1, EXOC2, RAB2B, RAB8B, MYO1C, TAOK2,…	0.0172829	down
GO:0000904	cell morphogenesis involved in differentiation	30	NRP2, RTN4RL1, ERBB3, ERBB2, PIP5K1C, GLI2, ALCAM, DAB2, APP, PTK2, MACF1, CXCR4, SEMA3B, LAMB1, FN1, ACTB, PTPRM, RYK, CREB1, EFNB1, MAP1B, VASP, HES1, SEMA6A, NOTCH1, LAMA5, CYFIP1, VCAN, FEZ2, MYH10	0.0174261	down
GO:0007409	axonogenesis	25	ACTB, NRP2, PTPRM, RTN4RL1, ERBB3, RYK, EFNB1, CREB1, ERBB2, MAP1B, PIP5K1C, GLI2, VASP, ALCAM, SEMA6A, NOTCH1, PTK2, APP, MACF1, CXCR4, CYFIP1, SEMA3B, VCAN, FEZ2, MYH10	0.0175654	down
GO:0048702	embryonic neurocranium morphogenesis	3	TULP3, NDST1, TGFB3	0.0177004	down
GO:0048666	neuron development	39	NRP2, RTN4RL1, ERBB3, ERBB2, PIP5K1C, GJA1, PPT1, GLI2, PTEN, ALCAM, APP, PTK2, MACF1, CD44, CXCR4, ATXN10, SEMA3B, LAMB1, ACTB, PTPRM, MAP2K1, HTT, RYK, CREB1, EFNB1, MAP1B, PRKCI, GAS7, VASP, HES1, SMO, SEMA6A, NOTCH1, GNAQ, NTRK2, CYFIP1, VCAN, FEZ2, MYH10	0.0177297	down
GO:0008284	positive regulation of cell proliferation	46	NAMPT, PDGFB, STAT5A, CSF1, ERBB2, STAT5B, TIPIN, PRRX1, PRRX2, CALR, GLI2, ADA, SSR1, ARNT, S1PR2, RPA1, S1PR3, PTN, BCL6, SHC1, CALCRL, LAMB1, CDK13, KLF5, ADAM10, SPHK2, TBX3, EFNB1, ROGDI, CDK6, IGF2, IL6R, KDR, HES1, VEGFB, SMO, PLA2G4A, CDKN1A, CCND1, NOTCH1, HDAC1, CCND2, HIPK2, PBX1, MAB21L1, LRP5	0.0177415	down
GO:0045216	cell-cell junction organization	8	SMAD7, TGFB3, PRKCI, SMAD3, GJA1, CTNNA1, GJA5, GJC1	0.0178329	down
GO:0000087	M phase of mitotic cell cycle	28	LZTS2, FZR1, CETN3, TIPIN, RCC1, CCNG1, LATS1, CCNG2, NDE1, NCAPH, KATNA1, CLASP1, ARHGEF2, KIF11, PDS5B, MAP2K1, ANAPC5, CKAP5, PAPD7, NDC80, SMC3, WEE1, NCAPD2, CCNB1, MAD2L1, CLIP1, HAUS8, NEK6	0.0179916	down
GO:0007179	transforming growth factor beta receptor signaling pathway	11	FMOD, PDGFB, LTBP3, ID1, CREB1, SMAD5, TGFB3, SMAD3, SMAD2, SMAD1, ENG	0.0181799	down
GO:0010647	positive regulation of cell communication	38	ING2, SLC44A2, ERBB3, CSF1, ERBB2, TGFB3, PRRX1, TSPAN6, GJA1, AFAP1L2, ZEB2, ITPKB, PRRX2, JAG1, LPAR1, ADA, ARNT, GPC3, TICAM2, RHOC, THBS1, CFLAR, TAOK2, ADAMTS20, TAOK3, MALT1, IGF2, WLS, IL6R, NOTCH2, ACVR2B, PLK2, ITGA8, MIB2, HIPK2, NTRK2, ENG, NEK6	0.0182326	down
GO:0043193	positive regulation of gene-specific transcription	14	MEF2C, HES1, HMGB2, NOTCH1, PSMC5, HDAC1, ETS1, CREB1, TGFB3, SMAD3, SMAD2, NR2F2, ENG, ARNT	0.0185536	down
GO:0060485	mesenchyme development	10	NRP2, EDNRA, SMO, EDNRB, NOTCH1, LAMA5, EFNB1, CFL1, SEMA3C, ZEB2	0.0194014	down
GO:0006350	transcription	191	MEF2C, SLC2A4RG, JDP2, CNOT8, STAT5A, STAT5B, CNOT2, FOXO1, TCEAL8, REST, MED22, FOXO3, CNOT6, PNN, PRIM1, MAMSTR, ZNF184, HOXC8, FLI1, MIER2, CGGBP1, MIER3, CREB3L2, PSIP1, PATZ1, RARA, IKBKAP, ZNF592, ZNF644, RCOR1, ZHX1, RXRG, ZNF814, HMG20A, HMG20B, AHR, HES1, RFC1, PRDM4, PRDM5, MED18, PIAS2, TGIF2, PIAS1, EID1, CAMTA2, TSHZ1, ZNF132, TADA3, GPBP1L1, ZNF131, MYEF2, ELK3, ZNF512, ATF2, CXXC1,…	0.0197601	down
GO:0051726	regulation of cell cycle	38	XPO1, FZR1, STAT5A, STAT5B, TIPIN, AFAP1L2, RCC1, CCNG1, CALR, LATS1, PTEN, CCNG2, SCRIB, CSNK2A2, APP, CASP3, CUL7, PCBP4, CDKN2C, BCL6, CDK13, TBX3, GMNN, SMAD3, CDK6, IGF2, PKIA, CCNB1, CDKN1A, CCND1, MAD2L1, PRDM4, HDAC1, CCND2, ETS1, DGKZ, FBXO31, NEK6	0.0198609	down
GO:0010811	positive regulation of cell-substrate adhesion	7	SMOC1, CSF1, SMAD3, CDK6, ECM2, THBS1, SPP1	0.0199537	down
GO:0051146	striated muscle cell differentiation	14	ACADM, ACTA1, ERBB2, UTRN, MYOZ1, LUZP6, APP, XIRP1, CDON, MYOG, CHRNB1, MYH10, SNTA1, TMOD1	0.0202518	down
GO:0008064	regulation of actin polymerization or depolymerization	11	TRIOBP, LIMA1, SCIN, CFL1, TMSB10, ARF6, ARPC5, LATS1, RASA1, SPTAN1, DSTN	0.0202579	down
GO:0048844	artery morphogenesis	5	SMAD7, NF1, PRRX1, PRRX2, ENG	0.0203678	down
GO:0006916	anti-apoptosis	26	MEF2C, CFLAR, YWHAZ, NOL3, SPHK2, TBX3, HTT, VHL, STAT5A, STAT5B, PRKCI, FOXO1, MALT1, NME6, NOTCH2, PEA15, AMIGO2, HSP90B1, HDAC1, SQSTM1, GSK3B, CFL1, DDAH2, THBS1, CASP2, DHCR24	0.0205732	down
GO:0051493	regulation of cytoskeleton organization	19	TRIOBP, XPO1, ARHGEF2, LIMA1, MAP1A, MAP1B, SMAD3, ARF6, TMSB10, ARPC5, LATS1, DSTN, MACF1, CEP250, SCIN, CFL1, CLASP1, RASA1, SPTAN1	0.0208035	down
GO:0043065	positive regulation of apoptosis	47	ING3, PDIA3, PREX1, RBM5, STK17B, TGFB3, FOXO3, PTEN, SCRIB, APP, CASP3, PTGIS, CD44, CASP9, TIAM2, SQSTM1, PCBP4, CDKN2C, ALDH1A3, BCL6, DAP, CASP2, TOP2A, HIP1, TXNIP, CFLAR, ARHGEF2, HTT, AIFM1, DFFA, NF1, YWHAB, SMAD3, ARHGEF17, BAD, VAV2, STK4, NCSTN, NOTCH2, PLA2G4A, CDKN1A, NOTCH1, ETS1, HIPK2, SCIN, PDCD6, MAP3K11	0.021105	down
GO:0050767	regulation of neurogenesis	22	XRCC5, ZNF488, ARHGEF1, PLXNB2, NF1, MAP1B, SMAD1, REST, GLI2, CALR, TTL, TTC3, HES1, NOTCH3, SMO, NOTCH1, PTK2, CCND2, NTRK2, PBX1, TGIF2, SPP1	0.0211931	down
GO:0010648	negative regulation of cell communication	30	GNAI3, ERBB3, TGFB3, CALR, PTEN, ADA, CHD8, PEG10, BCHE, HTRA1, PPP2CB, BCL6, SKIL, THBS1, SMAD7, NF1, TAOK3, SOCS7, RGS19, SOCS5, CISH, DDIT4, DKK3, CCND1, TULP3, RGS4, HIPK2, LRP6, DGKZ, ENG	0.0212669	down
GO:0051174	regulation of phosphorus metabolic process	52	PDGFB, TGFB3, ZEB2, LPAR1, PTEN, LATS1, SPRY4, EDNRA, S1PR2, SPRY2, EDNRB, PRKAR2B, SPRY1, APP, CASP3, CXCR4, CDKN2C, SHC1, SPRED1, FAM129A, CCDC88C, IL6R, PKIA, CCND1, ACVR2B, CCND2, PRKD3, MAP3K11, PTPLAD1, ERBB2, CSF1, CCNG1, PPAP2A, THBS1, AGK, MAP2K1, SPHK2, TAOK2, SMAD7, NF1, MET, YWHAB, SMAD3, IGF2, MALT1, VAV2, CISH, CDKN1A, RGS4, DGKZ, ENG, DUSP6	0.0212915	down
GO:0019220	regulation of phosphate metabolic process	52	PDGFB, TGFB3, ZEB2, LPAR1, PTEN, LATS1, SPRY4, EDNRA, S1PR2, SPRY2, EDNRB, PRKAR2B, SPRY1, APP, CASP3, CXCR4, CDKN2C, SHC1, SPRED1, FAM129A, CCDC88C, IL6R, PKIA, CCND1, ACVR2B, CCND2, PRKD3, MAP3K11, PTPLAD1, ERBB2, CSF1, CCNG1, PPAP2A, THBS1, AGK, MAP2K1, SPHK2, TAOK2, SMAD7, NF1, MET, YWHAB, SMAD3, IGF2, MALT1, VAV2, CISH, CDKN1A, RGS4, DGKZ, ENG, DUSP6	0.0212915	down
GO:0001702	gastrulation with mouth forming second	6	ACVR2B, LDB1, LRP6, UGDH, NSD1, LRP5	0.0212955	down
GO:0051272	positive regulation of cell motion	15	ADAM10, MAP2K1, PDGFB, ETS1, CSF1, BCAR1, STAT5B, SMAD3, IGF2, BCL6, IL6R, LAMB1, THBS1, HDAC7, KDR	0.0214408	down
GO:0009611	response to wounding	56	HPS5, NDST1, PDGFB, STAT5B, TGFB3, LUZP6, S1PR3, CASP3, CD44, CXCR4, TICAM2, LOX, GATM, CHST2, IL6R, CHST1, SMO, GNAQ, VCAN, AOC3, TPST1, GGCX, YWHAZ, RTN4RL1, ERBB3, ERBB2, AFAP1L2, C1R, C1S, ELK3, IL10RB, THBS1, FN1, SPP1, PLAT, MYF6, MAP2K1, EFEMP2, NF1, MAP1B, SMAD3, IGF2, SMAD1, CCNB1, NOTCH3, NOTCH2, NOTCH1, PLSCR4, TFRC, ITGA5, STAB1, LTA4H, ENG, PLAU, IGFBP4, MYH10	0.0220156	down
GO:0010557	positive regulation of macromolecule biosynthetic process	67	MEF2C, PDGFB, STAT5A, STAT5B, TGFB3, FOXO1, ZEB1, FOXO3, GLI2, APP, SMARCD1, SHC1, NR2F2, FAM129A, EGR1, RXRG, AHR, HES1, NCOA1, HIPK2, PIAS2, CAND1, PIAS1, NSD1, CAMTA2, HMGB2, ING2, ABLIM3, AFAP1L2, CALR, ARNT, CHD8, RGMB, SQSTM1, MYOG, SUPT4H1, NFATC2, TCF4, THBS1, ZNF423, MYF6, KLF5, TBX3, KLF12, VHL, TAF8, CREB1, TP53BP1, SMAD5, SMAD3, CREB5, TEAD2, IGF2, SMAD2, TRIM24, SMAD1, NOTCH1, PSMC5,…	0.0225154	down
GO:0022402	cell cycle process	59	LZTS2, LATS1, NDE1, APP, CEP250, PCBP4, CDKN2C, PSMD5, DHCR24, ARHGEF2, KIF11, ANAPC5, PAPD7, CDK6, WEE1, NCAPD2, CCND1, MAD2L1, CCND2, CDK2AP1, CLIP1, HAUS8, STMN1, KPNA2, NEK6, MAP3K11, FZR1, CETN3, TIPIN, POLA1, CCNG1, RCC1, CALR, CCNG2, SESN1, SESN3, MLF1, RPA1, NCAPH, MACF1, KATNA1, PKD2, CLASP1, THBS1, PDS5B, MAP2K1, MKI67, CKAP5, SMAD3, NDC80, GAS7, SMC3, CCNB1, NOTCH2, CDKN1A, PSMC5, GSK3…	0.023132	down
GO:0048285	organelle fission	28	LZTS2, FZR1, CETN3, TIPIN, RCC1, CCNG1, LATS1, CCNG2, NDE1, NCAPH, KATNA1, CLASP1, ARHGEF2, KIF11, PDS5B, MAP2K1, ANAPC5, CKAP5, PAPD7, NDC80, SMC3, WEE1, NCAPD2, CCNB1, MAD2L1, CLIP1, HAUS8, NEK6	0.0232764	down
GO:0042325	regulation of phosphorylation	50	PDGFB, TGFB3, ZEB2, LPAR1, PTEN, LATS1, SPRY4, EDNRA, S1PR2, SPRY2, EDNRB, PRKAR2B, SPRY1, APP, CASP3, CXCR4, CDKN2C, SHC1, SPRED1, FAM129A, CCDC88C, IL6R, PKIA, CCND1, ACVR2B, CCND2, PRKD3, MAP3K11, PTPLAD1, ERBB2, CSF1, CCNG1, PPAP2A, THBS1, AGK, MAP2K1, SPHK2, TAOK2, SMAD7, MET, NF1, IGF2, MALT1, VAV2, CISH, CDKN1A, RGS4, DGKZ, ENG, DUSP6	0.0233952	down
GO:0030199	collagen fibril organization	7	LUM, NF1, COL12A1, LOX, COL5A2, ADAMTS2, ANXA2	0.0235276	down
GO:0043068	positive regulation of programmed cell death	47	ING3, PDIA3, PREX1, RBM5, STK17B, TGFB3, FOXO3, PTEN, SCRIB, APP, CASP3, PTGIS, CD44, CASP9, TIAM2, SQSTM1, PCBP4, CDKN2C, ALDH1A3, BCL6, DAP, CASP2, TOP2A, HIP1, TXNIP, CFLAR, ARHGEF2, HTT, AIFM1, DFFA, NF1, YWHAB, SMAD3, ARHGEF17, BAD, VAV2, STK4, NCSTN, NOTCH2, PLA2G4A, CDKN1A, NOTCH1, ETS1, HIPK2, SCIN, PDCD6, MAP3K11	0.0236793	down
GO:0008286	insulin receptor signaling pathway	8	PHIP, BCAR1, PTPRA, SOCS7, FOXO1, IGF2, SHC1, STXBP4	0.0238153	down
GO:0048667	cell morphogenesis involved in neuron differentiation	26	NRP2, ACTB, PTPRM, RTN4RL1, RYK, ERBB3, CREB1, ERBB2, EFNB1, MAP1B, PIP5K1C, GLI2, VASP, HES1, ALCAM, SEMA6A, NOTCH1, PTK2, APP, MACF1, CXCR4, CYFIP1, VCAN, SEMA3B, FEZ2, MYH10	0.0241336	down
GO:0045786	negative regulation of cell cycle	13	GMNN, SMAD3, CDK6, LATS1, SCRIB, CDKN1A, CASP3, MAD2L1, HDAC1, PRDM4, ETS1, DGKZ, BCL6	0.024594	down
GO:0045765	regulation of angiogenesis	11	PTPRM, STAB1, ID1, ERBB2, NF1, NPR1, TIE1, THBS1, ANGPT2, EPHB4, HDAC7	0.024925	down
GO:0030832	regulation of actin filament length	11	TRIOBP, LIMA1, SCIN, CFL1, TMSB10, ARF6, ARPC5, LATS1, RASA1, SPTAN1, DSTN	0.024925	down
GO:0032868	response to insulin stimulus	15	RBP4, ERBB3, BCAR1, PTPRA, PRKCI, GGH, SOCS7, FOXO1, IGF2, STXBP4, LPIN1, PHIP, CCND2, SHC1, PARP1	0.0251175	down
GO:0010942	positive regulation of cell death	47	ING3, PDIA3, PREX1, RBM5, STK17B, TGFB3, FOXO3, PTEN, SCRIB, APP, CASP3, PTGIS, CD44, CASP9, TIAM2, SQSTM1, PCBP4, CDKN2C, ALDH1A3, BCL6, DAP, CASP2, TOP2A, HIP1, TXNIP, CFLAR, ARHGEF2, HTT, AIFM1, DFFA, NF1, YWHAB, SMAD3, ARHGEF17, BAD, VAV2, STK4, NCSTN, NOTCH2, PLA2G4A, CDKN1A, NOTCH1, ETS1, HIPK2, SCIN, PDCD6, MAP3K11	0.0252625	down
GO:0007052	mitotic spindle organization	5	KIF11, NDC80, STMN1, RCC1, SMC3	0.0260772	down
GO:0007017	microtubule-based process	30	CETN3, RCC1, TTL, APP, PTK2, NDE1, MACF1, CEP250, KATNA1, TUBB6, CLASP1, TUBA1A, TUBA1C, KIF2A, KIF11, MAP2K1, HTT, CKAP5, MAP1B, NDC80, PCM1, KIF3C, SMC3, BBS2, SS18, STMN1, HAUS8, KPNA2, DYNC1I2, MAP3K11	0.02697	down
GO:0045449	regulation of transcription	231	MEF2C, SLC2A4RG, STAT5A, FST, STAT5B, PDLIM1, REST, MED22, MAMSTR, APP, FLI1, TRAK2, CREB3L2, PATZ1, RARA, IKBKAP, ZNF644, RCOR1, ZHX1, RXRG, HMG20A, HMG20B, HES1, PRDM4, RFC1, PRDM5, MED18, TGIF2, PIAS2, PIAS1, ZNF132, TADA3, GPBP1L1, ZNF131, AFAP1L2, CALR, ZNF512, TCF20, LYL1, HTATSF1, LEO1, TCF4, BCOR, HIP1, KLF5, ZNF623, KLF12, MAP2K1, SMAD7, SUB1, TP53BP1, ASXL1, SMAD5, RYBP, SMAD3, ZNF521, …	0.0270058	down
GO:0048332	mesoderm morphogenesis	8	MACF1, TBX3, HTT, SMAD3, SMAD2, SMAD1, ECSIT, EXT2	0.0272698	down
GO:0032103	positive regulation of response to external stimulus	11	EDNRA, AGTR1, PLA2G4A, ADAM10, PDGFB, STAT5A, STAT5B, SMAD3, IL6R, THBS1, KDR	0.0275276	down
GO:0031328	positive regulation of cellular biosynthetic process	69	MEF2C, PDGFB, STAT5A, STAT5B, TGFB3, FOXO1, ZEB1, FOXO3, GLI2, APP, SMARCD1, SHC1, NR2F2, FAM129A, EGR1, RXRG, AHR, HES1, NCOA1, HIPK2, PIAS2, CAND1, PIAS1, NSD1, CAMTA2, HMGB2, ING2, ABLIM3, AFAP1L2, CALR, ARNT, CHD8, RGMB, SQSTM1, MYOG, SUPT4H1, NFATC2, TCF4, THBS1, ZNF423, MYF6, KLF5, TBX3, KLF12, VHL, TAF8, CREB1, TP53BP1, SMAD5, SMAD3, NPR1, SMAD2, CREB5, TEAD2, IGF2, TRIM24, SMAD1, PLA2G4A,…	0.0283411	down
GO:0031076	embryonic camera-type eye development	4	TULP3, ALDH1A3, SP3, ZEB1	0.0287253	down
GO:0031529	ruffle organization	4	LIMA1, CYFIP1, ARF6, LPIN1	0.0287253	down
GO:0006491	N-glycan processing	4	MGAT4B, MAN2A1, MAN1A2, ST8SIA4	0.0287253	down
GO:0010717	regulation of epithelial to mesenchymal transition	4	SMAD7, TGFB3, SMAD3, SMAD2	0.0287253	down
GO:0030031	cell projection assembly	13	KLF5, MTSS1, BBS2, ITGA6, PDGFB, LAMA5, WASF2, CYFIP1, ACTN2, LPAR1, VAV2, PCM1, MYH10	0.0291853	down
GO:0048545	response to steroid hormone stimulus	24	ARSB, TXNIP, HMGB2, MAP2K1, LDLR, PDGFB, ACTA1, ERBB2, MAP1B, STAT5B, TGFB3, IL6R, PTEN, CCND1, PLA2G4A, CDKN1A, CCND2, BCHE, SLC25A36, MGEA5, RARA, LOX, THBS1, SPP1	0.0291955	down
GO:0051960	regulation of nervous system development	24	XRCC5, ZNF488, ARHGEF1, PLXNB2, NF1, MAP1B, SMAD1, REST, GLI2, CALR, TTL, TTC3, HES1, NOTCH3, SMO, NOTCH1, PTK2, TULP3, CCND2, NTRK2, PBX1, TGIF2, EIF2AK3, SPP1	0.0291955	down
GO:0040012	regulation of locomotion	24	ADAM10, PTPRM, MAP2K1, PDGFB, SMAD7, CSF1, BCAR1, NF1, SMAD3, IGF2, IL6R, JAG1, PTEN, ADA, KDR, BBS2, LAMA4, CXCR4, LAMA5, ROBO4, TIE1, LAMB1, THBS1, HDAC7	0.0291955	down
GO:0051129	negative regulation of cellular component organization	19	TRIOBP, ARHGEF2, LIMA1, ARHGEF1, SMAD7, MAP1A, MAP1B, ARF6, TMSB10, PTEN, TTC3, PTK2, MAD2L1, SCIN, DNMT1, CLASP1, THBS1, SPP1, SPTAN1	0.030653	down
GO:0044087	regulation of cellular component biogenesis	19	TRIOBP, MAP1B, TGFB3, SMAD3, ARF6, TMSB10, ARPC5, PTEN, LATS1, AHR, PTK2, CDC42EP1, GSK3B, SCIN, RALA, CAND1, THBS1, RASA1, SPTAN1	0.030653	down
GO:0007044	cell-substrate junction assembly	6	ITGA6, TAOK2, ITGA5, LAMA5, ACTN2, FN1	0.0309063	down
GO:0016525	negative regulation of angiogenesis	6	PTPRM, STAB1, NPR1, TIE1, THBS1, ANGPT2	0.0309063	down
GO:0051329	interphase of mitotic cell cycle	15	ANAPC5, POLA1, CDK6, RCC1, LATS1, CCNB1, CCND1, CDKN1A, APP, CCND2, CDKN2C, KATNA1, CDK2AP1, KPNA2, MAP3K11	0.0314816	down
GO:0001558	regulation of cell growth	24	EXTL3, ADAM10, TAOK2, BCAR1, MAP1B, ADIPOR2, SMAD3, NPR1, IGF2, PPT1, CISH, TTL, VEGFB, AGTR1, PHF17, DAB2, CDKN1A, CD44, PRDM4, CDKN2C, HTRA1, BCL6, IGFBP4, SPP1	0.0324057	down
GO:0006936	muscle contraction	20	CNN3, ACTA1, TNNC1, MYH3, CALD1, UTRN, SMAD5, GJA1, ACTN2, TRIM63, GJA5, GJC1, EDNRA, EDNRB, SMTN, CHRND, CHRNB1, MYOF, CASQ2, SNTA1	0.0324127	down
GO:0045664	regulation of neuron differentiation	18	ARHGEF1, PLXNB2, MAP1B, SMAD1, REST, GLI2, CALR, TTL, TTC3, NOTCH3, HES1, NOTCH1, PTK2, CCND2, NTRK2, PBX1, TGIF2, SPP1	0.0326139	down
GO:0045446	endothelial cell differentiation	5	LAMA5, JAG1, NR2F2, ENG, KDR	0.032652	down
GO:0046579	positive regulation of Ras protein signal transduction	5	NOTCH2, ERBB2, CSF1, ITPKB, LPAR1	0.032652	down
GO:0000165	MAPKKK cascade	23	WNT5A, MAP2K1, TAOK2, NDST1, PTPLAD1, NF1, TAOK3, MET, TGFB3, IGF2, ITPKB, LPAR1, SMAD1, MAP4K3, S1PR2, SH2D3C, CXCR4, RGS4, SHC1, SPRED1, THBS1, DUSP6, MAP3K11	0.0329941	down
GO:0033273	response to vitamin	11	RBP4, PLA2G4A, CCND1, TFRC, CD44, BCHE, MAP1B, RARA, TIE1, SPP1, MEST	0.0333026	down
GO:0001779	natural killer cell differentiation	3	SP3, STAT5A, STAT5B	0.0335536	down
GO:0015014	heparan sulfate proteoglycan biosynthetic process, polysaccharide chain biosynthetic process	3	CSGALNACT1, EXT1, EXT2	0.0335536	down
GO:0051241	negative regulation of multicellular organismal process	21	RBP4, GNAI3, PDGFB, IGF2, ATP1A1, IL6R, ATP1A2, ADA, ANXA2, BBS2, NOTCH1, ATP2A2, BCHE, ATP2A1, MGEA5, RARA, BCL6, THBS1, EIF2AK3, PLAU, HDAC7	0.0339834	down
GO:0043434	response to peptide hormone stimulus	20	RBP4, GATM, ERBB3, STAT5A, BCAR1, MAP1B, STAT5B, PTPRA, PRKCI, GGH, SOCS7, FOXO1, IGF2, IL6R, STXBP4, LPIN1, PHIP, CCND2, SHC1, PARP1	0.0343507	down
GO:0051052	regulation of DNA metabolic process	16	PDGFB, IL27RA, GMNN, TGFB3, TIPIN, IGF2, GLI2, CALR, EYA3, PCNA, MGEA5, SHC1, BCL6, RNF168, KPNA2, KPNA1	0.0343834	down
GO:0032583	regulation of gene-specific transcription	18	MEF2C, HMGB2, SMAD7, CREB1, TGFB3, SMAD3, IGF2, SMAD2, ARNT, HES1, NOTCH1, PSMC5, HDAC1, ETS1, PEX14, BCOR, NR2F2, ENG	0.0347185	down
GO:0019751	polyol metabolic process	8	GPD2, SLC5A3, GALK1, GPD1, GDE1, INPPL1, GDPD3, PTEN	0.0351646	down
GO:0060562	epithelial tube morphogenesis	11	GPC3, CD44, LAMA5, CFL1, ZEB2, PBX1, IFT52, VASP, SCRIB, FZD6, GZF1	0.0364867	down
GO:0009891	positive regulation of biosynthetic process	69	MEF2C, PDGFB, STAT5A, STAT5B, TGFB3, FOXO1, ZEB1, FOXO3, GLI2, APP, SMARCD1, SHC1, NR2F2, FAM129A, EGR1, RXRG, AHR, HES1, NCOA1, HIPK2, PIAS2, CAND1, PIAS1, NSD1, CAMTA2, HMGB2, ING2, ABLIM3, AFAP1L2, CALR, ARNT, CHD8, RGMB, SQSTM1, MYOG, SUPT4H1, NFATC2, TCF4, THBS1, ZNF423, MYF6, KLF5, TBX3, KLF12, VHL, TAF8, CREB1, TP53BP1, SMAD5, SMAD3, NPR1, SMAD2, CREB5, TEAD2, IGF2, TRIM24, SMAD1, PLA2G4A,…	0.036586	down
GO:0007163	establishment or maintenance of cell polarity	9	NDE1, MACF1, ERBB2IP, CFL1, PRKCI, CLASP1, NDC80, CAP1, SCRIB	0.0366203	down
GO:0051297	centrosome organization	7	NDE1, KIF11, CEP250, CKAP5, CETN3, HAUS8, PCM1	0.0367372	down
GO:0060021	palate development	7	ACVR2B, TSHZ1, MEOX2, PRRX1, TGFB3, SMAD2, BCOR	0.0367372	down
GO:0045582	positive regulation of T cell differentiation	7	STAT5A, STAT5B, RARA, ITPKB, SOCS5, BAD, ADA	0.0367372	down
GO:0006790	sulfur metabolic process	16	TPST1, NDST1, NDST2, STAT5A, STAT5B, CHST2, DSE, CHST1, CSGALNACT1, BGN, DLD, SULF1, ENOPH1, PAPSS1, EXT1, EXT2	0.0367749	down
GO:0006261	DNA-dependent DNA replication	10	RPA1, PRIM1, HMGB2, RFC1, CDK2AP1, POLA1, TIPIN, MCM3, MCM4, MCM5	0.0369236	down
GO:0006606	protein import into nucleus	13	XPO1, PDIA3, IPO13, HTT, IPO11, TGFB3, PPIH, PTTG1IP, BCL6, TNPO1, KPNA2, RERE, KPNA1	0.0371874	down
GO:0007423	sensory organ development	27	DFNA5, RBP4, PTPRM, TSHZ1, ERBB3, ERBB2, NF1, PRKCI, TGFB3, PRRX1, JAG1, PRRX2, ZEB1, ZIC1, COL5A2, FZD6, HES1, SPRY2, TULP3, PVRL3, ITGA8, SP3, ALDH1A3, NTRK2, TGIF2, MAB21L1, MYH10	0.0384509	down
GO:0048706	embryonic skeletal system development	12	RBP4, TULP3, NDST1, HOXA6, GFPT1, SP3, PRRX1, TGFB3, PBX1, PRRX2, ZEB1, PCSK5	0.0386664	down
GO:0010769	regulation of cell morphogenesis involved in differentiation	12	PTK2, ARHGEF1, SMAD7, PLXNB2, MAP1B, TGFB3, SMAD3, SMAD2, SMAD1, TTL, TTC3, SPP1	0.0386664	down
GO:0002828	regulation of T-helper 2 type immune response	4	IL27RA, RARA, BCL6, SOCS5	0.0386747	down
GO:0006103	2-oxoglutarate metabolic process	4	GOT2, STAT5A, STAT5B, DLD	0.0386747	down
GO:0001953	negative regulation of cell-matrix adhesion	4	BCL6, THBS1, PTEN, RASA1	0.0386747	down
GO:0021513	spinal cord dorsal/ventral patterning	4	SMO, TULP3, RAB23, GLI2	0.0386747	down
GO:0051325	interphase	15	ANAPC5, POLA1, CDK6, RCC1, LATS1, CCNB1, CCND1, CDKN1A, APP, CCND2, CDKN2C, KATNA1, CDK2AP1, KPNA2, MAP3K11	0.0389452	down
GO:0043242	negative regulation of protein complex disassembly	8	TRIOBP, ARHGEF2, LIMA1, MAP1A, SCIN, MAP1B, CLASP1, SPTAN1	0.0396253	down
GO:0001570	vasculogenesis	8	SMO, PTK2, CUL7, NTRK2, ENG, RASA1, KDR, GJC1	0.0396253	down
GO:0051057	positive regulation of small GTPase mediated signal transduction	5	NOTCH2, ERBB2, CSF1, ITPKB, LPAR1	0.0401069	down
GO:0008589	regulation of smoothened signaling pathway	5	TULP3, PRRX1, RAB23, PRRX2, ZIC1	0.0401069	down
GO:0006297	nucleotide-excision repair, DNA gap filling	5	RFC5, RPA1, RFC1, RFC2, PCNA	0.0401069	down
GO:0030512	negative regulation of transforming growth factor beta receptor signaling pathway	5	PEG10, HTRA1, TGFB3, SKIL, ENG	0.0401069	down
GO:0000226	microtubule cytoskeleton organization	19	KIF11, CKAP5, MAP1B, CETN3, NDC80, PCM1, RCC1, TTL, SMC3, SS18, BBS2, NDE1, PTK2, MACF1, CEP250, KATNA1, CLASP1, STMN1, HAUS8	0.0412178	down
GO:0030182	neuron differentiation	46	NRP2, RTN4RL1, ERBB3, ERBB2, PIP5K1C, GJA1, PPT1, JAG1, GLI2, PTEN, LUZP6, ALCAM, APP, PTK2, HOXC8, MACF1, CD44, CXCR4, ATXN10, SEMA3B, LAMB1, ACTB, DFNA5, PTPRM, MAP2K1, HTT, RYK, CREB1, LDB1, EFNB1, MAP1B, PRKCI, GAS7, VASP, HES1, NOTCH3, SMO, SEMA6A, NOTCH1, TULP3, GNAQ, NTRK2, CYFIP1, VCAN, FEZ2, MYH10	0.0413649	down
GO:0008285	negative regulation of cell proliferation	39	RBP4, CNOT8, ERBB2, RBM5, TGFB3, GJA1, ZEB1, SESN1, PTEN, CDH5, CASP3, GPC3, CDKN2C, BCL6, PPAP2A, THBS1, QSOX1, DHCR24, PDS5B, PTPRM, JARID2, VHL, NF1, SMAD3, CDK6, SMAD2, SMAD1, TRIM24, NOTCH2, CDKN1A, EIF2AK1, LEPRE1, XIRP1, ETS1, SCIN, EIF2AK2, ENG, PRKRIR, NFIB	0.0416839	down
GO:0016051	carbohydrate biosynthetic process	15	GPD2, RBP4, GPD1, B3GALT2, NDST1, UGDH, DSE, CSGALNACT1, GPI, XYLT2, CHST10, XYLT1, GFPT1, EXT1, EXT2	0.041692	down
GO:0045665	negative regulation of neuron differentiation	7	NOTCH3, HES1, NOTCH1, PBX1, REST, CALR, TTC3	0.0420135	down
GO:0045639	positive regulation of myeloid cell differentiation	7	ETS1, STAT5A, CSF1, SCIN, JAG1, FOXO3, ARNT	0.0420135	down
GO:0003012	muscle system process	21	CAMTA2, CNN3, ACTA1, TNNC1, MYH3, CALD1, UTRN, SMAD5, GJA1, ACTN2, TRIM63, GJA5, GJC1, EDNRA, EDNRB, SMTN, CHRND, CHRNB1, MYOF, CASQ2, SNTA1	0.0422206	down
GO:0051170	nuclear import	13	XPO1, PDIA3, IPO13, HTT, IPO11, TGFB3, PPIH, PTTG1IP, BCL6, TNPO1, KPNA2, RERE, KPNA1	0.0433137	down
GO:0010720	positive regulation of cell development	11	XRCC5, SMO, ZNF488, NOTCH1, ARHGEF1, PLXNB2, MAP1B, TGFB3, SMAD3, SMAD2, SMAD1	0.0434749	down
GO:0001649	osteoblast differentiation	8	SMO, NF1, SMAD5, SMAD3, IGF2, SMAD1, GLI2, SPP1	0.0444397	down
GO:0045785	positive regulation of cell adhesion	10	ITGA6, SMAD7, ERBB2, SMOC1, CSF1, SMAD3, CDK6, ECM2, THBS1, SPP1	0.0446065	down
GO:0030163	protein catabolic process	62	PPP2R5C, USE1, SENP5, SENP6, FANCL, CUL7, MAP1LC3B, USP11, NEURL1B, PSMD5, RNF34, USP13, ADAM10, ANAPC5, SOCS7, UBR3, ERLIN2, ERLIN1, SOCS5, PJA1, MAD2L1, KLHL15, MIB2, BACE1, PIAS2, CAND1, FBXL7, ASB2, PIAS1, SPOPL, USP25, ASB5, USP30, FZR1, USP8, UBA6, PPT1, UBAC1, SUMO2, SQSTM1, PPP2CB, RNF168, RNF144B, VHL, UBE2L6, MALT1, TRIM63, CISH, ATE1, WSB1, CCNB1, NCSTN, UBE2E3, HSP90B1, TULP4, PSMC5, …	0.0455658	down
GO:0032269	negative regulation of cellular protein metabolic process	22	FZR1, ANAPC5, SMAD7, YWHAB, IGF2, IGF2BP2, CALR, PAIP2B, EIF2AK1, MAD2L1, PSMC5, PSMD10, ITGAV, RAB23, MGEA5, DNMT1, PSMD5, THBS1, FAM129A, ENG, EIF2AK3, EIF2AK4	0.0458134	down
GO:0051603	proteolysis involved in cellular protein catabolic process	60	PPP2R5C, SENP5, SENP6, FANCL, CUL7, MAP1LC3B, USP11, NEURL1B, PSMD5, RNF34, USP13, ADAM10, ANAPC5, SOCS7, UBR3, ERLIN2, ERLIN1, SOCS5, PJA1, MAD2L1, KLHL15, MIB2, BACE1, PIAS2, CAND1, FBXL7, ASB2, PIAS1, SPOPL, USP25, ASB5, USP30, FZR1, USP8, UBA6, UBAC1, SUMO2, SQSTM1, PPP2CB, RNF168, RNF144B, VHL, UBE2L6, MALT1, TRIM63, CISH, ATE1, WSB1, CCNB1, NCSTN, UBE2E3, HSP90B1, TULP4, PSMC5, PSMD10, FBXO…	0.0461415	down
GO:0033554	cellular response to stress	57	XRCC5, FOXO3, XRCC1, FANCL, CASP3, CASP9, XYLT1, PCBP4, NSMCE1, TLK1, FAM129A, TOP2A, GNL1, ESCO1, AIFM1, PAPD7, MAP4K3, EYA3, RFC5, SMO, SH2D3C, PYCR1, CCND1, RFC1, RFC2, HIPK2, VCAN, EIF2AK2, EIF2AK3, EIF2AK4, MAP3K11, WNT5A, HMGB2, RTN4RL1, PTPLAD1, TIPIN, POLA1, SESN1, ARNT, RPA1, TYMS, BCL6, RNF168, THBS1, MYOF, TP53BP1, MAP1B, TAOK3, SMC3, ATRX, CDKN1A, GSK3B, ATP2A1, PCNA, DGKZ, FBXO31, PA…	0.0464598	down
GO:0045165	cell fate commitment	18	SMAD5, MYEF2, SMAD2, JAG1, SMAD1, GLI2, KDR, NOTCH3, HES1, NOTCH2, SMO, SPRY2, CASP3, NOTCH1, SPRY1, CDON, NR2F2, IFRD1	0.0467523	down
GO:0045637	regulation of myeloid cell differentiation	11	LMO2, ETS1, LDB1, STAT5A, CSF1, SCIN, STAT5B, CDK6, JAG1, FOXO3, ARNT	0.0472884	down
GO:0007229	integrin-mediated signaling pathway	11	ITGA9, PTK2, ADAM10, ITGA6, ERBB2IP, ITGA5, LAMA5, ITGA8, BCAR1, ITGAV, COL16A1	0.0472884	down
GO:0034976	response to endoplasmic reticulum stress	7	CCND1, GSK3B, ATP2A1, EIF2AK2, FAM129A, EIF2AK3, EIF2AK4	0.0477426	down
GO:0021695	cerebellar cortex development	5	SMO, LDB1, GLI2, MYH10, LUZP6	0.0484464	down
GO:0007584	response to nutrient	18	ARSB, RBP4, GATM, MAP1B, ADIPOR2, ENSA, PTEN, TULP4, CCND1, PLA2G4A, TFRC, CD44, BCHE, RARA, TIE1, DDAH2, MEST, SPP1	0.0494757	down
GO:0006029	proteoglycan metabolic process	8	CSGALNACT1, BGN, NDST1, NDST2, SULF1, EXT1, EXT2, DSE	0.0496145	down
GO:0007162	negative regulation of cell adhesion	8	ADAM10, MAP2K1, ERBB3, TGFBI, BCL6, THBS1, PTEN, RASA1	0.0496145	down
GO:0030705	cytoskeleton-dependent intracellular transport	9	APP, NDE1, MACF1, MAP2K1, HTT, MYH3, WASF2, MYO9B, MYH10	0.0497364	down
GO:0007219	Notch signaling pathway	9	NOTCH3, NCSTN, NOTCH2, APP, NOTCH1, ADAM10, MIB2, JAG1, POFUT1	0.0497364	down
GO:0030166	proteoglycan biosynthetic process	6	CSGALNACT1, NDST1, NDST2, EXT1, EXT2, DSE	0.0497426	down
GO:0044257	cellular protein catabolic process	60	PPP2R5C, SENP5, SENP6, FANCL, CUL7, MAP1LC3B, USP11, NEURL1B, PSMD5, RNF34, USP13, ADAM10, ANAPC5, SOCS7, UBR3, ERLIN2, ERLIN1, SOCS5, PJA1, MAD2L1, KLHL15, MIB2, BACE1, PIAS2, CAND1, FBXL7, ASB2, PIAS1, SPOPL, USP25, ASB5, USP30, FZR1, USP8, UBA6, UBAC1, SUMO2, SQSTM1, PPP2CB, RNF168, RNF144B, VHL, UBE2L6, MALT1, TRIM63, CISH, ATE1, WSB1, CCNB1, NCSTN, UBE2E3, HSP90B1, TULP4, PSMC5, PSMD10, FBXO…	0.0498853	down
GO:0001944	vasculature development	55	NRP2, ACVRL1, WASF2, CSPG4, PRRX1, JAG1, TNFSF12, GJA4, PTEN, GJA5, MMP2, EDNRA, CUL7, CD44, CXCR4, ROBO4, SEMA3C, LOX, NR2F2, ANGPT2, RECK, PDPN, MMP19, ARHGAP24, THY1, SMO, VEGFA, ELK3, CDH5, GJC1, PTK2, ITGAV, PLCD1, THBS1, RASA1, COL18A1, PLAT, KLF5, TBX3, SPHK2, VHL, SMAD7, NF1, UBP1, ANXA2, KDR, NOTCH1, LAMA4, MEOX2, ID1, LAMA5, NTRK2, POFUT1, ENG, PLAU	3.20905e-13	up
GO:0001568	blood vessel development	54	NRP2, ACVRL1, WASF2, CSPG4, PRRX1, JAG1, TNFSF12, GJA4, PTEN, GJA5, MMP2, EDNRA, CUL7, CD44, CXCR4, ROBO4, SEMA3C, LOX, NR2F2, ANGPT2, RECK, MMP19, ARHGAP24, THY1, SMO, VEGFA, ELK3, CDH5, GJC1, PTK2, ITGAV, PLCD1, THBS1, RASA1, COL18A1, PLAT, KLF5, TBX3, SPHK2, VHL, SMAD7, NF1, UBP1, ANXA2, KDR, NOTCH1, LAMA4, MEOX2, ID1, LAMA5, NTRK2, POFUT1, ENG, PLAU	4.23619e-13	up
GO:0048514	blood vessel morphogenesis	43	NRP2, ACVRL1, WASF2, PRRX1, CSPG4, JAG1, ELK3, TNFSF12, PTEN, GJC1, EDNRA, PTK2, CUL7, CXCR4, ROBO4, SEMA3C, PLCD1, NR2F2, THBS1, ANGPT2, RASA1, KLF5, PLAT, COL18A1, VHL, SMAD7, NF1, MMP19, ARHGAP24, UBP1, KDR, ANXA2, THY1, SMO, NOTCH1, MEOX2, ID1, LAMA5, VEGFA, NTRK2, POFUT1, ENG, PLAU	1.77688e-09	up
GO:0001525	angiogenesis	32	NRP2, ACVRL1, WASF2, CSPG4, ELK3, JAG1, TNFSF12, PTEN, EDNRA, PTK2, CXCR4, ROBO4, PLCD1, THBS1, ANGPT2, KLF5, COL18A1, VHL, MMP19, ARHGAP24, UBP1, ANXA2, THY1, KDR, NOTCH1, MEOX2, ID1, LAMA5, VEGFA, POFUT1, ENG, PLAU	7.06216e-08	up
GO:0030198	extracellular matrix organization	26	RECK, COL18A1, VHL, ADAMTS20, NF1, OLFML2A, COL2A1, POSTN, ECM2, COL5A2, ANXA2, EMILIN1, APLP1, CSGALNACT1, PTK2, APP, ITGA8, SMOC1, TGFBI, COL12A1, LOX, VWA1, APBB1, ENG, ADAMTS2, GFOD2	7.85031e-08	up
GO:0007010	cytoskeleton organization	64	RHOJ, MTSS1, LIMA1, PDGFB, PREX1, WASF2, DSTN, NDE1, CEP250, RALA, CAP1, ARHGEF2, FMNL3, KIF11, ARHGEF17, PCM1, FLNB, VASP, THY1, EPB41L2, RND3, SS18, NCK2, BBS2, SCIN, STMN1, HAUS8, WASL, DBN1, HAUS4, TRIOBP, CNN3, ABLIM3, CALD1, SIPA1, MYO9B, ARF6, CYTH2, ARPC5, DAAM1, CALR, PTK2, CDC42EP2, MACF1, CLASP1, EHD2, ACTC1, NF2, TAOK2, CKAP5, NF1, MAP1B, EVL, NDC80, GAS7, SMC3, PPP1R9B, SEMA6A, PPP1R…	1.17921e-07	up
GO:0006928	cell motion	68	NRP2, MTSS1, ACVRL1, PDGFB, PLXNA2, WASF2, ZEB2, TNFSF12, GLI2, PTEN, DSTN, EDNRB, NDE1, APP, CD44, CXCR4, SEMA3C, SEMA3B, CAP1, MSN, NR2F2, PTPRM, CERCAM, VASP, CCNL2, SMO, NCK2, VCAN, WASL, FUT8, ERBB2, CALD1, ARF6, ARPC5, SCRIB, TPM4, EPHB2, TPM3, ALCAM, PTK2, MACF1, B3GNT1, THBS1, PPAP2A, FN1, ACTB, PLAT, MAP2K1, TAOK2, VHL, MET, VAV2, KDR, SEMA6A, ITGA6, LAMA5, ETS1, ITGA5, FYN, ID1, LRP6, M…	1.18226e-07	up
GO:0030036	actin cytoskeleton organization	41	RHOJ, TRIOBP, MTSS1, LIMA1, CNN3, PDGFB, PREX1, CALD1, WASF2, ARF6, CYTH2, MYO9B, ARPC5, DAAM1, CALR, DSTN, CDC42EP2, RALA, CAP1, EHD2, FMNL3, ARHGEF2, ACTC1, TAOK2, NF2, NF1, ARHGEF17, EVL, FLNB, GAS7, VASP, EPB41L2, PPP1R9B, NCK2, RND3, PPP1R9A, CDC42BPG, SCIN, WASL, DBN1, MYH10	1.31175e-07	up
GO:0022604	regulation of cell morphogenesis	29	RHOJ, TGFB3, CDC42SE1, TTC3, EPHB2, CDC42EP2, PTK2, CDC42EP1, RASA1, FN1, SPP1, ARHGEF1, TAOK2, PDPN, SMAD7, PLXNB2, MAP1B, SMAD3, FBLIM1, SMAD2, SMAD1, GAS7, THY1, KDR, FYN, VEGFA, CYFIP1, AKAP2, MYH10	1.93163e-07	up
GO:0007242	intracellular signaling cascade	140	ADCY3, THRA, TGFB3, ITPKB, LPAR1, PRKCSH, RGL1, S1PR3, AGTR1, TIAM2, RALB, RAB23, RALA, TLK1, GNG2, RARA, PRKACA, SPRED1, DDAH2, PAG1, IKBKAP, MAGI3, DFFA, ARID1A, SOCS5, STK4, MAP4K3, RND3, MAPK3, PIAS2, STMN1, PIAS1, MAPK7, EIF2AK3, RAD17, WNT5A, FGFR1, HMGB2, PTPLAD1, ERBB2, SIPA1, STK17B, TIPIN, ARF6, MYO9B, CALR, MYO9A, CDC42EP1, RHOBTB2, RAB8B, TAOK2, MAP2K1, SMAD7, TAOK3, MET, MALT1, NDC80…	2.2916e-07	up
GO:0030029	actin filament-based process	42	RHOJ, TRIOBP, MTSS1, LIMA1, CNN3, PDGFB, PREX1, CALD1, WASF2, ARF6, CYTH2, MYO9B, ARPC5, DAAM1, CALR, DSTN, CDC42EP2, RALA, CAP1, EHD2, FMNL3, ARHGEF2, ACTC1, TAOK2, NF2, MYH3, NF1, ARHGEF17, EVL, FLNB, GAS7, VASP, EPB41L2, PPP1R9B, NCK2, RND3, PPP1R9A, CDC42BPG, SCIN, WASL, DBN1, MYH10	2.78516e-07	up
GO:0006468	protein amino acid phosphorylation	85	CDK17, ACVRL1, STK35, TGFB3, PRDX2, FER, LPAR1, FES, LATS1, DMPK, CSNK2A2, APP, CXCR4, SHC1, PRKACA, TLK1, TIE1, CDK14, CDK13, CDC7, SRPK2, IKBKAP, ADAM10, PKN2, CDK6, PRKCE, STK4, WEE1, SRPK1, CDK2, PRKD1, MAP4K3, PRKD2, CCND1, ACVR2B, EIF2AK1, MAPK3, NEK8, TESK1, CDK2AP1, CAMK1, CDK11B, NRK, MAPK7, MAP3K14, EIF2AK3, EIF2AK4, NEK6, PRKD3, MAP3K11, CAMK1D, FGFR1, FGFR4, PTPLAD1, STK10, ERBB2, STK…	4.62852e-07	up
GO:0001501	skeletal system development	50	AEBP1, THRA, NDST1, LTBP3, TCOF1, TGFB3, PRRX1, POSTN, ZEB1, GLI2, GJA5, MMP2, HOXC8, COL12A1, SMO, ACVR2B, CTSK, GNAQ, NAB2, EXT1, EIF2AK3, EXT2, WNT5A, FGFR1, ACP2, COL2A1, SUFU, HOXA6, PAPSS1, PCSK5, SPP1, BMP1, EVC, TBX3, RYK, SMAD5, NF1, SMAD3, IGF2, SPARC, SMAD1, COL5A2, ANXA2, TULP3, GFPT1, SP3, PBX1, BMP5, IGFBP4, CDH11	4.97186e-07	up
GO:0035295	tube development	39	WNT5A, FGFR4, TGFB3, ZEB2, GLI2, GJA5, ASAH1, SCRIB, ADA, EDNRA, SPRY2, SPRY1, GPC3, CD44, CXCR4, LOX, PCSK5, TRAF4, MAN1A2, TBX3, PDPN, SMAD2, VASP, FZD6, GZF1, KDR, HES1, MAN2A1, ACVR2B, NOTCH1, LAMA5, SP3, VEGFA, MAPK8IP3, PBX1, IFT52, ADAMTS2, ENG, NFIB	5.10948e-07	up
GO:0030323	respiratory tube development	24	WNT5A, FGFR4, MAN1A2, PDPN, TGFB3, SMAD2, GLI2, ADA, ASAH1, KDR, HES1, MAN2A1, SPRY2, ACVR2B, NOTCH1, LAMA5, SP3, VEGFA, MAPK8IP3, LOX, PCSK5, ADAMTS2, TRAF4, NFIB	8.75559e-07	up
GO:0009890	negative regulation of biosynthetic process	75	MEF2C, JDP2, THRA, PDGFB, RBM15B, FST, TGFB3, ZEB2, ZEB1, REST, GLI2, CBX5, EDNRA, HOXC8, NR2F2, KDM5B, EGR1, LDB1, ZHX1, TP53, PKIA, MXD3, NRIP2, GZF1, HES1, EIF2AK1, NAB2, MGEA5, LCOR, NSD1, EIF2AK3, EIF2AK4, RAD17, ING4, EID1, HMGB2, TIPIN, IGF2BP2, ITGB3, ELK3, CALR, ZNF174, ITGAV, PEX14, SUPT4H1, SKIL, BCOR, TCF4, BAZ2A, ZNF423, TBX3, NF2, KLF12, SMAD7, VHL, JARID2, RYBP, TRIM27, CD276, YWHA…	8.95307e-07	up
GO:0048598	embryonic morphogenesis	47	WNT5A, TSHZ1, NDST1, TGFB3, PRRX1, COL2A1, ZEB2, ZEB1, GLI2, GJA5, SPRY2, MACF1, HOXA6, ALDH1A3, RAB23, PRKACA, FBN2, TBX3, NF2, HTT, LDB1, FTO, TP53, SMAD3, SMAD2, SMAD1, VASP, FZD6, HES1, NOTCH2, ACVR2B, NOTCH1, TULP3, GNAQ, LAMA5, ITGA8, CDON, SP3, GFPT1, LRP6, PBX1, IFT52, EXT1, NSD1, EXT2, PBX2, LRP5	2.24394e-06	up
GO:0010558	negative regulation of macromolecule biosynthetic process	71	MEF2C, JDP2, THRA, RBM15B, FST, TGFB3, ZEB2, ZEB1, REST, GLI2, CBX5, HOXC8, NR2F2, KDM5B, EGR1, LDB1, ZHX1, TP53, PKIA, MXD3, NRIP2, GZF1, HES1, EIF2AK1, NAB2, MGEA5, LCOR, NSD1, EIF2AK3, EIF2AK4, RAD17, ING4, EID1, HMGB2, TIPIN, IGF2BP2, ITGB3, ELK3, CALR, ZNF174, ITGAV, PEX14, SUPT4H1, SKIL, BCOR, TCF4, BAZ2A, ZNF423, TBX3, NF2, KLF12, VHL, JARID2, SMAD7, RYBP, TRIM27, YWHAB, CD276, SMAD3, SMAD…	2.45753e-06	up
GO:0060541	respiratory system development	24	WNT5A, FGFR4, MAN1A2, PDPN, TGFB3, SMAD2, GLI2, ADA, ASAH1, KDR, HES1, MAN2A1, SPRY2, ACVR2B, NOTCH1, TULP3, LAMA5, ALDH1A3, SP3, VEGFA, MAPK8IP3, LOX, ADAMTS2, NFIB	2.51253e-06	up
GO:0031327	negative regulation of cellular biosynthetic process	72	MEF2C, JDP2, THRA, PDGFB, RBM15B, FST, TGFB3, ZEB2, ZEB1, REST, GLI2, CBX5, EDNRA, HOXC8, NR2F2, KDM5B, EGR1, LDB1, ZHX1, TP53, PKIA, MXD3, NRIP2, GZF1, HES1, EIF2AK1, NAB2, MGEA5, LCOR, NSD1, EIF2AK3, EIF2AK4, RAD17, ING4, EID1, HMGB2, TIPIN, IGF2BP2, ELK3, CALR, ZNF174, PEX14, SUPT4H1, SKIL, BCOR, TCF4, BAZ2A, ZNF423, TBX3, NF2, KLF12, SMAD7, VHL, JARID2, RYBP, TRIM27, YWHAB, CD276, SMAD3, SMAD…	3.12606e-06	up
GO:0007155	cell adhesion	85	NRP2, MTSS1, AEBP1, THRA, PCDHGA9, PCDHGA7, POSTN, FER, MEGF10, SDC3, PNN, PCDH1, APP, SRPX, CHST10, CD93, CD44, TGFBI, COL12A1, MSN, LOXL2, BOC, PTPRM, MAGI1, INPPL1, PDPN, PTPRS, FBLIM1, CERCAM, CTNNA1, SIRPA, THY1, JUP, HES1, AMIGO2, RND3, SGCE, VCAN, ADAM15, AOC3, CTNND1, COL2A1, ARF6, ITGB3, SCRIB, DCHS1, CDH5, APLP1, ALCAM, ISLR, RGMB, COL6A6, ITGAV, PVRL3, PKD2, THBS1, LAMB1, THBS2, THBS3,…	3.38467e-06	up
GO:0022610	biological adhesion	85	NRP2, MTSS1, AEBP1, THRA, PCDHGA9, PCDHGA7, POSTN, FER, MEGF10, SDC3, PNN, PCDH1, APP, SRPX, CHST10, CD93, CD44, TGFBI, COL12A1, MSN, LOXL2, BOC, PTPRM, MAGI1, INPPL1, PDPN, PTPRS, FBLIM1, CERCAM, CTNNA1, SIRPA, THY1, JUP, HES1, AMIGO2, RND3, SGCE, VCAN, ADAM15, AOC3, CTNND1, COL2A1, ARF6, ITGB3, SCRIB, DCHS1, CDH5, APLP1, ALCAM, ISLR, RGMB, COL6A6, ITGAV, PVRL3, PKD2, THBS1, LAMB1, THBS2, THBS3,…	3.59232e-06	up
GO:0008360	regulation of cell shape	16	RHOJ, TAOK2, PDPN, FBLIM1, CDC42SE1, GAS7, KDR, CDC42EP2, CDC42EP1, FYN, VEGFA, CYFIP1, AKAP2, RASA1, MYH10, FN1	4.6089e-06	up
GO:0032535	regulation of cellular component size	42	TRIOBP, FGFR1, EXTL3, LIMA1, ACVRL1, PDGFB, SIPA1, TGFB3, ARF6, PPT1, ARPC5, LATS1, DSTN, APP, CDC42EP2, DAB2, CDKN2C, RASA1, IP6K2, SPP1, ADAM10, CREB1, MAP1B, TP53, SMAD3, NPR1, IGF2, SOCS5, CSRP2, VAT1, PPP1R9B, NOTCH2, NCK2, PHF17, ERBB2IP, PRDM4, WHSC1L1, SCIN, CYFIP1, EMP3, APBB1, SPTAN1	6.22464e-06	up
GO:0030324	lung development	22	WNT5A, FGFR4, MAN1A2, PDPN, TGFB3, SMAD2, GLI2, ADA, ASAH1, KDR, HES1, MAN2A1, SPRY2, ACVR2B, NOTCH1, LAMA5, SP3, VEGFA, MAPK8IP3, LOX, ADAMTS2, NFIB	7.2648e-06	up
GO:0034330	cell junction organization	16	NF2, TAOK2, SMAD7, TGFB3, SMAD3, GJA1, ITGB3, CTNNA1, GJA4, GJA5, GJC1, THY1, ITGA6, LAMA5, ITGA5, FN1	9.54906e-06	up
GO:0016477	cell migration	42	NRP2, ACVRL1, FUT8, PDGFB, PLXNA2, WASF2, ZEB2, TNFSF12, PTEN, SCRIB, EDNRB, PTK2, NDE1, CD44, CXCR4, SEMA3C, CAP1, MSN, PPAP2A, NR2F2, THBS1, FN1, PLAT, TAOK2, VHL, MET, VAV2, KDR, SMO, NCK2, ITGA6, ID1, FYN, LAMA5, ITGA5, LRP6, VCAN, APBB1, ENG, PLAU, MYH10, LRP5	9.83336e-06	up
GO:0042127	regulation of cell proliferation	91	ACVRL1, CNOT8, PDGFB, RBM5, PRRX1, TGFB3, GJA1, TNFSF12, ZEB1, JAG1, GLI2, PTEN, EDNRA, EDNRB, AGTR1, S1PR3, CASP3, GPC3, CDKN2C, SHC1, CALCRL, DHCR24, CDK13, CDC7, ARHGEF2, PTPRM, ADAM10, TP53, SIX5, CDK6, CDK2, VEGFB, HES1, SMO, NCK2, CCND1, EIF2AK1, CCND2, SCIN, VEGFA, MNT, EMP3, ING4, FGFR1, FGFR4, ERBB2, TIPIN, CALR, ADA, CDH5, ARNT, RPA1, THBS1, LAMB1, PPAP2A, QSOX1, KLF5, COL18A1, TP53I11,…	1.07742e-05	up
GO:0043062	extracellular structure organization	29	ERBB2, UTRN, POSTN, COL2A1, APLP1, APP, PTK2, SMOC1, TGFBI, COL12A1, LOX, VWA1, GFOD2, RECK, COL18A1, ADAMTS20, VHL, NF1, MAP1B, OLFML2A, ECM2, COL5A2, EMILIN1, ANXA2, CSGALNACT1, ITGA8, APBB1, ADAMTS2, ENG	1.75601e-05	up
GO:0007167	enzyme linked receptor protein signaling pathway	48	FMOD, FGFR1, MTSS1, MPZL1, FGFR4, ACVRL1, PDGFB, FUT8, NDST1, LTBP3, ERBB2, FST, TGFB3, FSTL1, EPHB4, PTEN, EPHB2, PHIP, RGMB, PTK2, SHC1, TIE1, PLAT, SMAD9, NIN, SMAD7, CREB1, PTPRA, MET, SMAD5, SMAD3, IGF2, SMAD2, STXBP4, SOCS5, SMAD1, KDR, NCK2, SS18, ACVR2B, ERBB2IP, ID1, VEGFA, ARF4, NTRK2, SMURF2, ENG, EIF2AK3	1.86555e-05	up
GO:0034329	cell junction assembly	13	ITGA6, TAOK2, ITGA5, SMAD7, LAMA5, GJA1, ITGB3, GJA4, CTNNA1, GJA5, THY1, FN1, GJC1	2.31526e-05	up
GO:0045597	positive regulation of cell differentiation	36	XRCC5, ZNF488, TGFB3, ITPKB, JAG1, GLI2, ADA, EPHB2, ARNT, AGTR1, RARA, BOC, FNDC3B, SH3PXD2B, SMAD9, ARHGEF1, MAP2K1, ADAMTS20, VHL, PLXNB2, MAP1B, SMAD5, CD276, SMAD3, IGF2, SMAD2, BAD, SOCS5, SMAD1, SMO, ACVR2B, NOTCH1, ETS1, SCIN, CAMK1, TGIF2	2.33469e-05	up
GO:0001503	ossification	23	THRA, BMP1, NF1, SMAD5, TGFB3, SMAD3, IGF2, COL2A1, SPARC, SMAD1, GLI2, MMP2, COL5A2, SMO, CTSK, NAB2, SP3, EXT1, EXT2, EIF2AK3, BMP5, CDH11, SPP1	2.50743e-05	up
GO:0000902	cell morphogenesis	49	NRP2, PIP5K1C, GJA1, GLI2, APP, NDE1, DAB2, CXCR4, SEMA3B, CAP1, ARHGEF2, PTPRM, PDPN, PCM1, STK4, VASP, HES1, SS18, BBS2, SMO, VCAN, ERBB2, SCRIB, EPHB2, ALCAM, PTK2, MACF1, B3GNT1, CLASP1, LAMB1, FN1, COL18A1, ACTB, MAP2K1, VHL, RYK, CREB1, MAP1B, NDC80, GAS7, SEMA6A, NOTCH1, ERBB2IP, LAMA5, MAPK8IP3, CYFIP1, APBB1, FEZ2, MYH10	2.51778e-05	up
GO:0051094	positive regulation of developmental process	41	XRCC5, ZNF488, FST, TGFB3, ITPKB, JAG1, TNFSF12, GLI2, ADA, EPHB2, ARNT, AGTR1, RARA, THBS1, BOC, FNDC3B, SH3PXD2B, SMAD9, ARHGEF1, MAP2K1, VHL, ADAMTS20, PLXNB2, MAP1B, SMAD5, CD276, SMAD3, IGF2, SMAD2, BAD, SMAD1, SOCS5, SMO, ACVR2B, NOTCH1, PLA2G4A, ETS1, SCIN, CAMK1, TGIF2, HDAC7	2.68484e-05	up
GO:0030030	cell projection organization	50	NRP2, MTSS1, LIMA1, PDGFB, WASF2, GJA1, PIP5K1C, LPAR1, GLI2, PTEN, APP, CD44, CXCR4, ATXN10, SEMA3B, PTPRM, PCM1, VASP, BBS2, NCK2, SMO, VCAN, FGFR1, ERBB2, ARF6, EPHB2, ALCAM, PTK2, MACF1, B3GNT1, LAMB1, ACTB, KLF5, MAP2K1, RYK, CREB1, MAP1B, VAV2, GAS7, SEMA6A, PPP1R9B, NOTCH1, ITGA6, LAMA5, ITGA8, MAPK8IP3, CYFIP1, APBB1, FEZ2, MYH10	2.90221e-05	up
GO:0016481	negative regulation of transcription	58	MEF2C, JDP2, THRA, RBM15B, FST, ZEB2, REST, ZEB1, GLI2, CBX5, HOXC8, NR2F2, KDM5B, EGR1, LDB1, ZHX1, TP53, PKIA, NRIP2, MXD3, GZF1, HES1, NAB2, LCOR, NSD1, EID1, ING4, HMGB2, ELK3, CALR, ZNF174, PEX14, SUPT4H1, SKIL, BCOR, TCF4, BAZ2A, ZNF423, TBX3, KLF12, VHL, JARID2, SMAD7, RYBP, TRIM27, YWHAB, SMAD3, SMAD2, TRIM24, SNAI2, UBP1, HDAC2, ID1, JAZF1, YWHAQ, DNMT1, SMURF2, ENG	5.08357e-05	up
GO:0045934	negative regulation of nucleobase, nucleoside, nucleotide and nucleic acid metabolic process	63	MEF2C, JDP2, THRA, RBM15B, FST, TGFB3, ZEB2, REST, ZEB1, GLI2, CBX5, EDNRA, HOXC8, NR2F2, KDM5B, EGR1, LDB1, ZHX1, TP53, PKIA, NRIP2, MXD3, GZF1, HES1, NAB2, LCOR, NSD1, RAD17, ING4, EID1, HMGB2, TIPIN, ELK3, CALR, ZNF174, PEX14, SUPT4H1, SKIL, BCOR, TCF4, BAZ2A, ZNF423, TBX3, NF2, KLF12, VHL, JARID2, SMAD7, RYBP, TRIM27, YWHAB, SMAD3, SMAD2, TRIM24, SNAI2, UBP1, HDAC2, ID1, JAZF1, YWHAQ, DNMT1, …	5.12074e-05	up
GO:0048870	cell motility	43	NRP2, ACVRL1, FUT8, PDGFB, PLXNA2, WASF2, ZEB2, TNFSF12, PTEN, SCRIB, EDNRB, PTK2, NDE1, CD44, CXCR4, SEMA3C, CAP1, MSN, PPAP2A, NR2F2, THBS1, FN1, PLAT, TAOK2, VHL, MET, VAV2, KDR, SMO, NCK2, ITGA6, ID1, FYN, ETS1, LAMA5, ITGA5, LRP6, VCAN, APBB1, ENG, PLAU, MYH10, LRP5	5.67874e-05	up
GO:0051674	localization of cell	43	NRP2, ACVRL1, FUT8, PDGFB, PLXNA2, WASF2, ZEB2, TNFSF12, PTEN, SCRIB, EDNRB, PTK2, NDE1, CD44, CXCR4, SEMA3C, CAP1, MSN, PPAP2A, NR2F2, THBS1, FN1, PLAT, TAOK2, VHL, MET, VAV2, KDR, SMO, NCK2, ITGA6, ID1, FYN, ETS1, LAMA5, ITGA5, LRP6, VCAN, APBB1, ENG, PLAU, MYH10, LRP5	5.67874e-05	up
GO:0009100	glycoprotein metabolic process	32	OSTC, GALNT1, NDST1, FUT8, LDLR, NDST2, TSPAN7, COL2A1, B3GNT9, ST6GALNAC6, ST6GALNAC4, GALNT10, TRAK2, ST3GAL5, B3GNT1, CHST14, DHCR24, MGAT4B, MAN1A2, B3GALT2, FUT11, CSGALNACT1, NCSTN, MAN2A1, ADAMTS9, ST8SIA4, SULF1, BACE1, MGEA5, EXT1, POFUT1, EXT2	6.20778e-05	up
GO:0016044	membrane organization	50	SEC31A, LDLR, AP1G1, WASF2, MEGF10, APP, DAB2, AP1S2, CD93, NECAP2, TIE1, CAP1, DHCR24, SEC23A, STX6, TP53, LDLRAP1, ARRB1, FNBP1L, IGF2R, RIN2, COPE, BID, GNAI3, CDC42SE1, SNX4, CYTH2, PPT1, APLP1, ITGAV, FCER1G, SNAP23, THBS1, EHD2, HIP1, HTT, RUFY1, CORO1C, SH3BP4, PLSCR4, STAB1, PLSCR3, RAB34, RAB22A, LRP6, SH3D19, CHRNB1, MYH10, CLCN5, LRP5	7.11597e-05	up
GO:0060348	bone development	23	THRA, BMP1, NF1, SMAD5, TGFB3, SMAD3, IGF2, COL2A1, SPARC, SMAD1, GLI2, MMP2, COL5A2, SMO, CTSK, NAB2, SP3, EXT1, EXT2, EIF2AK3, BMP5, CDH11, SPP1	7.30226e-05	up
GO:0017015	regulation of transforming growth factor beta receptor signaling pathway	12	PEG10, ING2, HTRA1, ITGA8, TGFB3, SMAD3, SMAD2, SMURF2, SKIL, ZEB1, THBS1, ENG	7.38645e-05	up
GO:0051172	negative regulation of nitrogen compound metabolic process	63	MEF2C, JDP2, THRA, RBM15B, FST, TGFB3, ZEB2, REST, ZEB1, GLI2, CBX5, EDNRA, HOXC8, NR2F2, KDM5B, EGR1, LDB1, ZHX1, TP53, PKIA, NRIP2, MXD3, GZF1, HES1, NAB2, LCOR, NSD1, RAD17, ING4, EID1, HMGB2, TIPIN, ELK3, CALR, ZNF174, PEX14, SUPT4H1, SKIL, BCOR, TCF4, BAZ2A, ZNF423, TBX3, NF2, KLF12, VHL, JARID2, SMAD7, RYBP, TRIM27, YWHAB, SMAD3, SMAD2, TRIM24, SNAI2, UBP1, HDAC2, ID1, JAZF1, YWHAQ, DNMT1, …	7.56168e-05	up
GO:0060284	regulation of cell development	32	XRCC5, ZNF488, TGFB3, REST, GLI2, CALR, TTC3, EPHB2, PTK2, BOC, SPP1, ARHGEF1, TBX3, SMAD7, PLXNB2, NF1, MAP1B, TP53, SMAD3, IGF2, SMAD2, SMAD1, THY1, NOTCH3, HES1, SMO, NOTCH1, CCND2, NTRK2, PBX1, TGIF2, DBN1	8.23708e-05	up
GO:0010605	negative regulation of macromolecule metabolic process	82	MEF2C, JDP2, THRA, RBM15B, FST, TGFB3, ZEB2, ZEB1, REST, GLI2, CBX5, HOXC8, RAB23, PSMD5, NR2F2, FAM129A, KDM5B, EGR1, LDB1, ZHX1, TP53, PKIA, MXD3, NRIP2, GZF1, HES1, EIF2AK1, MAD2L1, NAB2, MGEA5, LCOR, NSD1, EIF2AK3, EIF2AK4, RAD17, ING4, EID1, FZR1, HMGB2, TIPIN, IGF2BP2, ITGB3, ELK3, CALR, ZNF174, ITGAV, PEX14, SUPT4H1, SKIL, THBS1, BCOR, TNRC6B, TCF4, BAZ2A, ZNF423, NF2, TBX3, KLF12, SMAD7, …	0.000102921	up
GO:0045892	negative regulation of transcription, DNA-dependent	47	MEF2C, ING4, EID1, JDP2, FST, REST, ZEB1, CALR, GLI2, CBX5, ZNF174, HOXC8, PEX14, SUPT4H1, SKIL, TCF4, NR2F2, BCOR, BAZ2A, KDM5B, EGR1, KLF12, TBX3, VHL, SMAD7, JARID2, LDB1, ZHX1, RYBP, TRIM27, TP53, SMAD3, SMAD2, TRIM24, SNAI2, PKIA, NRIP2, GZF1, HES1, HDAC2, ID1, YWHAQ, JAZF1, DNMT1, LCOR, NSD1, ENG	0.000104964	up
GO:0048729	tissue morphogenesis	29	FRAS1, FST, ZEB2, JAG1, GLI2, SCRIB, GPC3, MACF1, CD44, ALDH1A3, PRKACA, ACTC1, NF2, TBX3, SMAD7, HTT, SMAD3, SMAD2, SMAD1, VASP, FZD6, GZF1, NOTCH2, NOTCH1, LAMA5, FREM2, PBX1, IFT52, EXT2	0.000109072	up
GO:0007389	pattern specification process	38	TSHZ1, FST, ZEB2, ZEB1, GLI2, EDNRA, HOXC8, CXCR4, HOXA6, RAB23, PKD2, NR2F2, BCOR, PCSK5, MLLT3, TBX3, HTT, LDB1, SMAD5, FTO, SMAD2, SMAD1, HES1, NOTCH2, SMO, ACVR2B, NOTCH1, TULP3, MEOX2, VEGFA, LRP6, PBX1, IFT52, POFUT1, PBX2, ENG, BMP5, LRP5	0.000117516	up
GO:0010324	membrane invagination	33	LDLR, AP1G1, WASF2, CDC42SE1, PPT1, SNX4, CYTH2, MEGF10, APLP1, APP, DAB2, AP1S2, CD93, ITGAV, NECAP2, FCER1G, CAP1, THBS1, EHD2, HIP1, RUFY1, LDLRAP1, CORO1C, SH3BP4, STAB1, FNBP1L, IGF2R, RAB22A, RAB34, LRP6, RIN2, CLCN5, LRP5	0.000134875	up
GO:0006897	endocytosis	33	LDLR, AP1G1, WASF2, CDC42SE1, PPT1, SNX4, CYTH2, MEGF10, APLP1, APP, DAB2, AP1S2, CD93, ITGAV, NECAP2, FCER1G, CAP1, THBS1, EHD2, HIP1, RUFY1, LDLRAP1, CORO1C, SH3BP4, STAB1, FNBP1L, IGF2R, RAB22A, RAB34, LRP6, RIN2, CLCN5, LRP5	0.000134875	up
GO:0007178	transmembrane receptor protein serine/threonine kinase signaling pathway	20	FMOD, SMAD9, ACVRL1, PDGFB, FUT8, LTBP3, SMAD7, CREB1, SMAD5, FST, TGFB3, SMAD3, SMAD2, FSTL1, SMAD1, ACVR2B, RGMB, ID1, SMURF2, ENG	0.000145758	up
GO:0048736	appendage development	20	WNT5A, TBX3, FTO, PRRX1, COL2A1, GJA5, NOTCH2, NOTCH1, TULP3, GNAQ, MEOX2, RAB23, LRP6, PBX1, FBN2, IFT52, NR2F2, PBX2, PCSK5, LRP5	0.000145758	up
GO:0060173	limb development	20	WNT5A, TBX3, FTO, PRRX1, COL2A1, GJA5, NOTCH2, NOTCH1, TULP3, GNAQ, MEOX2, RAB23, LRP6, PBX1, FBN2, IFT52, NR2F2, PBX2, PCSK5, LRP5	0.000145758	up
GO:0051253	negative regulation of RNA metabolic process	47	MEF2C, ING4, EID1, JDP2, FST, REST, ZEB1, CALR, GLI2, CBX5, ZNF174, HOXC8, PEX14, SUPT4H1, SKIL, TCF4, NR2F2, BCOR, BAZ2A, KDM5B, EGR1, KLF12, TBX3, VHL, SMAD7, JARID2, LDB1, ZHX1, RYBP, TRIM27, TP53, SMAD3, SMAD2, TRIM24, SNAI2, PKIA, NRIP2, GZF1, HES1, HDAC2, ID1, YWHAQ, JAZF1, DNMT1, LCOR, NSD1, ENG	0.000155942	up
GO:0016310	phosphorylation	87	CDK17, ACVRL1, STK35, TGFB3, PRDX2, FER, LPAR1, FES, LATS1, DMPK, CSNK2A2, APP, CXCR4, SHC1, PRKACA, TLK1, TIE1, CDK14, IP6K2, CDK13, CDC7, SRPK2, IKBKAP, ADAM10, PKN2, CDK6, PRKCE, STK4, WEE1, SRPK1, CDK2, PRKD1, MAP4K3, PRKD2, CCND1, ACVR2B, EIF2AK1, MAPK3, NEK8, TESK1, CDK2AP1, CAMK1, CDK11B, NRK, MAPK7, MAP3K14, EIF2AK3, EIF2AK4, NEK6, PRKD3, MAP3K11, CAMK1D, FGFR1, FGFR4, PTPLAD1, STK10, ERB…	0.00015691	up
GO:0006796	phosphate metabolic process	102	STK35, TGFB3, PTPN21, LPAR1, DMPK, CSNK2A2, APP, TLK1, PRKACA, IKBKAP, PTPRM, PTPRS, STK4, WEE1, MAP4K3, EIF2AK1, MAPK3, TESK1, NEK8, CAMK1, MAPK7, EIF2AK3, EIF2AK4, NEK6, FGFR1, FGFR4, PTPLAD1, STK10, ERBB2, STK17B, EPHB4, EPHB2, PTK2, PTPN9, NIN, PTPN18, MAP2K1, TAOK2, RYK, TAOK1, SMAD7, MET, TAOK3, SMAD2, PTPN12, KDR, CDC42BPG, PLK2, NTRK2, GRK5, CDK17, ACVRL1, PRDX2, FER, FES, LATS1, PTEN, CX…	0.000162422	up
GO:0006793	phosphorus metabolic process	102	STK35, TGFB3, PTPN21, LPAR1, DMPK, CSNK2A2, APP, TLK1, PRKACA, IKBKAP, PTPRM, PTPRS, STK4, WEE1, MAP4K3, EIF2AK1, MAPK3, TESK1, NEK8, CAMK1, MAPK7, EIF2AK3, EIF2AK4, NEK6, FGFR1, FGFR4, PTPLAD1, STK10, ERBB2, STK17B, EPHB4, EPHB2, PTK2, PTPN9, NIN, PTPN18, MAP2K1, TAOK2, RYK, TAOK1, SMAD7, MET, TAOK3, SMAD2, PTPN12, KDR, CDC42BPG, PLK2, NTRK2, GRK5, CDK17, ACVRL1, PRDX2, FER, FES, LATS1, PTEN, CX…	0.000162422	up
GO:0007265	Ras protein signal transduction	20	RHOJ, ARHGEF1, USP8, MAP2K1, PTPLAD1, NF1, WASF2, YWHAB, MYO9B, ARHGAP29, TAX1BP3, RFXANK, CDC42EP1, GNB1, MAPK3, RALB, RALA, SHC1, SHC2, DHCR24	0.000189521	up
GO:0032989	cellular component morphogenesis	50	NRP2, PIP5K1C, GJA1, GLI2, APP, NDE1, DAB2, CXCR4, SEMA3B, CAP1, ARHGEF2, PTPRM, PDPN, PCM1, STK4, VASP, HES1, SMO, SS18, BBS2, VCAN, ERBB2, SCRIB, EPHB2, ALCAM, PTK2, MACF1, B3GNT1, CLASP1, LAMB1, FN1, COL18A1, ACTB, ACTC1, MAP2K1, VHL, RYK, CREB1, MAP1B, NDC80, GAS7, SEMA6A, NOTCH1, ERBB2IP, LAMA5, MAPK8IP3, CYFIP1, APBB1, FEZ2, MYH10	0.000195836	up
GO:0010629	negative regulation of gene expression	60	MEF2C, JDP2, THRA, RBM15B, FST, ZEB2, REST, ZEB1, GLI2, CBX5, HOXC8, NR2F2, KDM5B, EGR1, LDB1, ZHX1, TP53, PKIA, NRIP2, MXD3, GZF1, HES1, NAB2, LCOR, NSD1, ING4, EID1, HMGB2, ELK3, CALR, ZNF174, PEX14, SUPT4H1, SKIL, BCOR, TNRC6B, TCF4, BAZ2A, ZNF423, TBX3, KLF12, VHL, JARID2, SMAD7, RYBP, TRIM27, YWHAB, SMAD3, SMAD2, SMAD1, TRIM24, SNAI2, UBP1, HDAC2, ID1, JAZF1, YWHAQ, DNMT1, SMURF2, ENG	0.000199088	up
GO:0007507	heart development	32	NRP2, SRI, ERBB2, GJA1, COL2A1, GLI2, GJA5, PTEN, GJC1, EDNRA, CASP3, PKD2, SEMA3C, CALCRL, BCOR, PCSK5, ACTC1, TBX3, SMAD7, NF1, SMAD2, SMO, ACVR2B, NOTCH1, GNAQ, ID1, MOSPD3, IFT52, POFUT1, ENG, CASQ2, MYH10	0.000200277	up
GO:0008361	regulation of cell size	31	FGFR1, EXTL3, ACVRL1, PDGFB, SIPA1, TGFB3, PPT1, APP, DAB2, CDKN2C, IP6K2, SPP1, ADAM10, CREB1, MAP1B, TP53, SMAD3, NPR1, IGF2, SOCS5, CSRP2, VAT1, PPP1R9B, PHF17, NOTCH2, ERBB2IP, PRDM4, WHSC1L1, CYFIP1, EMP3, APBB1	0.000211167	up
GO:0030334	regulation of cell migration	27	ACVRL1, PDGFB, JAG1, ITGB3, PTEN, ADA, CXCR4, ROBO4, TIE1, THBS1, LAMB1, COL18A1, PTPRM, ADAM10, NF2, MAP2K1, PDPN, SMAD7, NF1, SMAD3, IGF2, THY1, KDR, LAMA4, LAMA5, VEGFA, HDAC7	0.000226978	up
GO:0001667	ameboidal cell migration	11	NRP2, SMO, EDNRB, CXCR4, LAMA5, WASF2, LRP6, SEMA3C, ZEB2, CAP1, LRP5	0.000231002	up
GO:0031175	neuron projection development	36	NRP2, FGFR1, ERBB2, PIP5K1C, GJA1, GLI2, PTEN, EPHB2, ALCAM, APP, PTK2, MACF1, CD44, CXCR4, ATXN10, B3GNT1, SEMA3B, LAMB1, ACTB, PTPRM, MAP2K1, RYK, CREB1, MAP1B, GAS7, VASP, PPP1R9B, SMO, SEMA6A, NOTCH1, CYFIP1, MAPK8IP3, VCAN, APBB1, FEZ2, MYH10	0.000231683	up
GO:0008283	cell proliferation	53	XRCC5, PDGFB, FST, ZEB2, PRDX2, TXLNA, ZEB1, FES, GLI2, PTEN, EDNRA, NDE1, DAB2, CXCR4, TGFBI, GNG2, ARHGEF1, PDPN, TP53, PRKD1, VEGFB, IFNAR2, PRDM4, GNB1, NAB2, VEGFA, CDK11B, MAP3K11, USP8, ERBB2, SIPA1, POLA1, EPHB4, NAA35, SCRIB, FZD9, PDS5B, MAP2K1, SPHK2, NF2, MKI67, TAF8, MET, CD276, TRIM27, MALT1, BAD, CSRP2, CSGALNACT1, FYN, LAMA5, IGFBP4, MYH10	0.000296494	up
GO:0007179	transforming growth factor beta receptor signaling pathway	14	FMOD, SMAD9, ACVRL1, FUT8, PDGFB, ID1, LTBP3, CREB1, SMAD5, TGFB3, SMAD3, SMAD2, SMAD1, ENG	0.000315793	up
GO:0051270	regulation of cell motion	29	ACVRL1, PDGFB, JAG1, ITGB3, PTEN, ADA, CXCR4, ROBO4, TIE1, THBS1, LAMB1, COL18A1, PTPRM, ADAM10, NF2, MAP2K1, PDPN, SMAD7, NF1, SMAD3, IGF2, THY1, KDR, BBS2, LAMA4, LAMA5, ETS1, VEGFA, HDAC7	0.000360713	up
GO:0030155	regulation of cell adhesion	23	ADAM10, ACVRL1, NF2, MAP2K1, SMAD7, ERBB2, NF1, SIPA1, SMAD3, CDK6, ECM2, PTEN, ADA, EMILIN1, LAMA4, ITGA6, LAMA5, SMOC1, TGFBI, THBS1, ENG, RASA1, SPP1	0.000365611	up
GO:0010810	regulation of cell-substrate adhesion	12	ACVRL1, NF2, SMOC1, NF1, SMAD3, CDK6, ECM2, THBS1, PTEN, RASA1, EMILIN1, SPP1	0.000366886	up
GO:0007264	small GTPase mediated signal transduction	40	RHOJ, USP8, PTPLAD1, WASF2, ARF6, MYO9B, RFXANK, RGL1, CDC42EP1, RALB, RHOBTB2, RAB23, RALA, RHOC, SHC1, SHC2, DHCR24, RAP2A, RAB2B, RAP2C, RAB8B, ARHGEF1, MAP2K1, NF1, YWHAB, RGS19, ARHGAP29, VAV2, TAX1BP3, ARL3, RAB33B, RND3, GNB1, ARF4, MAPK3, RAB22A, RAB34, YWHAQ, RIN2, RIT1	0.000426119	up
GO:0007369	gastrulation	15	NF2, HTT, LDB1, TP53, SMAD3, SMAD2, SMAD1, ACVR2B, MACF1, LRP6, PRKACA, EXT1, EXT2, NSD1, LRP5	0.000451826	up
GO:0045596	negative regulation of cell differentiation	31	HMGB3, FST, PRDX2, ITGB3, ZEB1, REST, JAG1, CALR, GLI2, TTC3, EPHB2, PTK2, ITGAV, SPP1, ARHGEF1, TBX3, SMAD7, LDB1, NF1, TP53, SMAD3, CDK6, SOCS5, THY1, HES1, NOTCH3, NOTCH2, CCND1, NOTCH1, PBX1, HDAC7	0.000482604	up
GO:0048666	neuron development	43	NRP2, FGFR1, ERBB2, PIP5K1C, GJA1, PPT1, GLI2, PTEN, EPHB2, ALCAM, APP, PTK2, MACF1, CD44, CXCR4, ATXN10, B3GNT1, SEMA3B, LAMB1, ACTB, PTPRM, MAP2K1, HTT, RYK, CREB1, MAP1B, GAS7, VASP, THY1, HES1, PPP1R9B, SMO, SEMA6A, NOTCH1, GNAQ, VEGFA, NTRK2, CYFIP1, MAPK8IP3, VCAN, APBB1, FEZ2, MYH10	0.000500305	up
GO:0045935	positive regulation of nucleobase, nucleoside, nucleotide and nucleic acid metabolic process	69	MEF2C, ACVRL1, THRA, PDGFB, TGFB3, TNFSF12, ZEB1, GLI2, APP, SMARCD1, SHC1, NR2F2, EGR1, TP53, ARID1A, AHR, CDK2, PRPF6, EYA3, HES1, NCOA1, VEGFA, MGEA5, PIAS2, CAND1, PIAS1, NSD1, CAMTA2, HMGB2, ING2, ABLIM3, AFAP1L2, CALR, ARNT, CHD8, RGMB, RNF168, MYOG, SUPT4H1, NFATC2, TCF4, ZNF423, KLF5, SMAD9, TBX3, MAP2K1, KLF12, VHL, TAF8, CREB1, TP53BP1, SMAD5, SMAD3, NPR1, CREB5, IGF2, SMAD2, TRIM24, SM…	0.000528155	up
GO:0008285	negative regulation of cell proliferation	45	ING4, CNOT8, ACVRL1, ERBB2, RBM5, TGFB3, GJA1, ZEB1, PTEN, CDH5, CASP3, GPC3, CDKN2C, PPAP2A, THBS1, QSOX1, DHCR24, COL18A1, TP53I11, PDS5B, PTPRM, NF2, VHL, JARID2, NF1, TP53, CD276, SMAD3, CDK6, SIX5, SMAD2, SMAD1, TRIM24, TAX1BP3, NOTCH2, NCK2, EIF2AK1, LEPRE1, ETS1, SCIN, MNT, EMP3, ENG, PRKRIR, NFIB	0.000535391	up
GO:0007049	cell cycle	82	ADCY3, LZTS2, SPIN1, SENP5, LATS1, NDE1, APP, CEP250, CDKN2C, PCBP4, TLK1, PSMD5, CDCA3, DHCR24, CDC7, ESCO1, ARHGEF2, KIF11, PDPN, TP53, PAPD7, HMG20B, CDK6, MCM3, WEE1, AHR, CDK2, TACC1, NCAPD2, MCM6, ARL3, CCND1, MAD2L1, CCND2, PRDM5, MAPK3, CDK2AP1, CDK11B, STMN1, HAUS8, MAPK7, KPNA2, NEK6, RAD17, MAP3K11, HAUS4, ING4, EID1, FZR1, KATNB1, TIPIN, POLA1, CALR, SESN3, RPA1, MACF1, PKD2, CLASP1, …	0.000601157	up
GO:0007015	actin filament organization	15	ARHGEF2, LIMA1, ACTC1, PREX1, CALD1, EVL, GAS7, DSTN, NCK2, PPP1R9B, CDC42EP2, PPP1R9A, SCIN, WASL, DBN1	0.000609599	up
GO:0016055	Wnt receptor signaling pathway	22	FZD9, WNT5A, LZTS2, CCDC88C, RYK, LDB1, TLE3, CTNND1, TAX1BP3, FZD6, CSNK2A2, DKK3, CCND1, CHD8, MACF1, INVS, GSK3B, KREMEN1, SFRP4, LRP6, WNT11, LRP5	0.000619936	up
GO:0048286	lung alveolus development	8	MAN2A1, MAN1A2, PDPN, VEGFA, TGFB3, MAPK8IP3, ADA, KDR	0.000693908	up
GO:0007517	muscle organ development	30	MEF2C, SRI, AEBP1, MYL4, ERBB2, UTRN, TAGLN2, PTEN, TAGLN3, GJC1, APP, MYOG, MKX, NR2F2, ACTC1, EVC, SMAD7, MYH3, NF1, MET, CSRP2, FLNB, SMTN, MEOX2, LAMA5, CHRND, SGCE, TCF12, ENG, MYH10	0.000706376	up
GO:0048754	branching morphogenesis of a tube	14	TBX3, GLI2, GZF1, KDR, EDNRA, SPRY2, NOTCH1, GPC3, CD44, CXCR4, LAMA5, VEGFA, PBX1, ENG	0.000714729	up
GO:0045859	regulation of protein kinase activity	43	ADCY3, PDGFB, PTPLAD1, ERBB2, TGFB3, PRDX2, ZEB2, LPAR1, PTEN, LATS1, SPRY4, EDNRA, SPRY2, SPRY1, APP, CASP3, CXCR4, CDKN2C, PRKACA, SHC1, SPRED1, PPAP2A, THBS1, AGK, MAP2K1, SPHK2, TAOK2, NF2, NF1, MET, MALT1, IGF2, PKIA, THY1, NCK2, ACVR2B, CCND1, CCND2, RGS4, DGKZ, MAPK8IP3, PRKD3, MAP3K11	0.000727611	up
GO:0040012	regulation of locomotion	28	ACVRL1, PDGFB, JAG1, ITGB3, PTEN, ADA, CXCR4, ROBO4, TIE1, THBS1, LAMB1, COL18A1, PTPRM, ADAM10, NF2, MAP2K1, PDPN, SMAD7, NF1, SMAD3, IGF2, THY1, KDR, BBS2, LAMA4, LAMA5, VEGFA, HDAC7	0.000746189	up
GO:0035107	appendage morphogenesis	18	WNT5A, TBX3, FTO, PRRX1, COL2A1, GJA5, NOTCH2, NOTCH1, TULP3, GNAQ, LRP6, RAB23, PBX1, FBN2, IFT52, PBX2, PCSK5, LRP5	0.00075838	up
GO:0035108	limb morphogenesis	18	WNT5A, TBX3, FTO, PRRX1, COL2A1, GJA5, NOTCH2, NOTCH1, TULP3, GNAQ, LRP6, RAB23, PBX1, FBN2, IFT52, PBX2, PCSK5, LRP5	0.00075838	up
GO:0016192	vesicle-mediated transport	64	SEC31A, LDLR, AP1G1, WASF2, USE1, TXLNA, MEGF10, AP2B1, APP, DAB2, AP1S2, CD93, NECAP2, CAP1, STX6, SEC23A, KDELR3, NCALD, VPS41, LDLRAP1, ERGIC1, ANKRD27, STXBP6, ARRB1, FNBP1L, IGF2R, SCIN, RIN2, COPE, YWHAZ, ARFGAP3, GNAI3, CDC42SE1, PPT1, SNX4, ARF6, CYTH2, APLP1, AP3M1, ITGAV, FCER1G, SNAP23, THBS1, EHD2, EXOC2, HIP1, RAB2B, HTT, SCRN1, RUFY1, CORO1C, SH3BP4, COG5, SCFD1, STAB1, RAB34, ARF4,…	0.000759321	up
GO:0043549	regulation of kinase activity	44	ADCY3, PDGFB, PTPLAD1, ERBB2, TGFB3, PRDX2, ZEB2, LPAR1, PTEN, LATS1, SPRY4, EDNRA, SPRY2, SPRY1, APP, CASP3, CXCR4, CDKN2C, PRKACA, SHC1, SPRED1, PPAP2A, THBS1, AGK, MAP2K1, SPHK2, TAOK2, NF2, NF1, MET, MALT1, IGF2, VAV2, PKIA, THY1, NCK2, ACVR2B, CCND1, CCND2, RGS4, DGKZ, MAPK8IP3, PRKD3, MAP3K11	0.000786946	up
GO:0007498	mesoderm development	15	TBX3, NF2, HTT, SMAD3, SMAD2, SMAD1, SNAI2, ACVR2B, MACF1, VEGFA, PRKACA, TIE1, EXT1, EXT2, MEST	0.000811779	up
GO:0048812	neuron projection morphogenesis	30	NRP2, ERBB2, GJA1, PIP5K1C, GLI2, EPHB2, ALCAM, APP, PTK2, MACF1, CXCR4, B3GNT1, SEMA3B, ACTB, PTPRM, MAP2K1, RYK, CREB1, MAP1B, GAS7, VASP, SEMA6A, SMO, NOTCH1, MAPK8IP3, CYFIP1, VCAN, APBB1, FEZ2, MYH10	0.000823253	up
GO:0006357	regulation of transcription from RNA polymerase II promoter	77	MEF2C, JDP2, THRA, FST, TGFB3, ZEB1, MED22, GLI2, HOXC8, APP, TRAK2, SMARCD1, NR2F2, EGR1, IKBKAP, TP53, PKIA, AHR, NRIP2, PRPF6, GZF1, HES1, IFNAR2, NCOA1, MED18, VEGFA, CAND1, LCOR, NSD1, EID1, CAMTA2, HMGB2, TADA3, ABLIM3, ZNF367, CALR, ARNT, ZNF174, CHD8, HTATSF1, MYOG, SUPT4H1, TCEA2, SKIL, BCOR, NFATC2, TCF4, CHD3, TAF4, TBX3, MAP2K1, KLF12, SMAD7, VHL, SUB1, JARID2, CREB1, SMAD5, RYBP, TRI…	0.00086407	up
GO:0048858	cell projection morphogenesis	33	NRP2, ERBB2, PIP5K1C, GJA1, GLI2, EPHB2, ALCAM, APP, PTK2, MACF1, CXCR4, B3GNT1, SEMA3B, ACTB, PTPRM, MAP2K1, RYK, CREB1, MAP1B, PCM1, GAS7, VASP, SMO, BBS2, SEMA6A, NOTCH1, LAMA5, CYFIP1, MAPK8IP3, VCAN, APBB1, FEZ2, MYH10	0.000935257	up
GO:0006605	protein targeting	30	BID, XPO1, YWHAZ, TGFB3, KATNB1, AKAP12, PEX6, CALR, SEC62, MACF1, TRAK2, HOMER3, AP3M1, PEX14, TNPO1, TAOK2, HTT, IPO11, YWHAB, TP53, STXBP4, PPIH, SEC61B, ERBB2IP, GSK3B, YWHAQ, PTTG1IP, MGEA5, KPNA2, RERE	0.000956691	up
GO:0000122	negative regulation of transcription from RNA polymerase II promoter	35	MEF2C, EID1, JDP2, FST, ZEB1, GLI2, CALR, ZNF174, HOXC8, SKIL, SUPT4H1, TCF4, NR2F2, BCOR, EGR1, KLF12, SMAD7, JARID2, VHL, RYBP, TRIM27, TP53, SMAD3, SNAI2, PKIA, NRIP2, GZF1, HES1, HDAC2, ID1, JAZF1, DNMT1, LCOR, NSD1, ENG	0.00096669	up
GO:0050767	regulation of neurogenesis	25	XRCC5, ZNF488, ARHGEF1, PLXNB2, NF1, MAP1B, TP53, SMAD1, REST, CALR, GLI2, TTC3, EPHB2, THY1, HES1, NOTCH3, SMO, NOTCH1, PTK2, CCND2, NTRK2, PBX1, TGIF2, DBN1, SPP1	0.000968711	up
GO:0051338	regulation of transferase activity	45	ADCY3, PDGFB, PTPLAD1, ERBB2, TGFB3, PRDX2, ZEB2, LPAR1, PTEN, LATS1, SPRY4, EDNRA, SPRY2, SPRY1, SERINC5, APP, CASP3, CXCR4, CDKN2C, PRKACA, SHC1, SPRED1, PPAP2A, THBS1, AGK, MAP2K1, SPHK2, TAOK2, NF2, NF1, MET, MALT1, IGF2, VAV2, PKIA, THY1, NCK2, ACVR2B, CCND1, CCND2, RGS4, DGKZ, MAPK8IP3, PRKD3, MAP3K11	0.00100168	up
GO:0030509	BMP signaling pathway	11	ACVR2B, RGMB, SMAD9, ID1, SMAD7, FST, SMAD5, FSTL1, SMURF2, SMAD1, ENG	0.00103188	up
GO:0009101	glycoprotein biosynthetic process	24	MGAT4B, OSTC, GALNT1, MAN1A2, B3GALT2, LDLR, FUT8, NDST1, NDST2, FUT11, TSPAN7, CSGALNACT1, B3GNT9, MAN2A1, ST6GALNAC6, ST6GALNAC4, GALNT10, TRAK2, ST3GAL5, ST8SIA4, B3GNT1, EXT1, POFUT1, EXT2	0.00111403	up
GO:0042981	regulation of apoptosis	83	XRCC5, MEF2C, PREX1, RBM5, TGFB3, PRDX2, TNFSF12, PTEN, EDNRB, CASP3, APP, PTGIS, CASP9, CD44, TIAM2, CDKN2C, PCBP4, NGFRAP1, DAP, DDAH2, CASP2, TOP2A, IP6K2, DHCR24, ARHGEF2, DFFA, ADAMTS20, TP53, ADNP, ARHGEF17, PRKCE, STK4, SMO, AMIGO2, IGF2R, SCIN, VEGFA, MNT, EIF2AK3, MAP3K11, CAMK1D, TRAF1, BID, ING4, ING3, YWHAZ, ERBB2, STK17B, COL2A1, PPT1, CALR, SCRIB, ADA, PEA15, CHD8, ALDH1A3, PPP2CB, …	0.00113509	up
GO:0051174	regulation of phosphorus metabolic process	55	ADCY3, PDGFB, TGFB3, ZEB2, PRDX2, LPAR1, PTEN, LATS1, SPRY4, EDNRA, SPRY2, EDNRB, SPRY1, APP, CASP3, CXCR4, CDKN2C, SHC1, PRKACA, SPRED1, FAM129A, PPP1R14B, CCDC88C, PRKCE, PKIA, THY1, NCK2, CCND1, ACVR2B, CCND2, PRKD3, RAD17, MAP3K11, PTPLAD1, ERBB2, PPAP2A, THBS1, AGK, MAP2K1, SPHK2, NF2, TAOK2, SMAD7, NF1, MET, YWHAB, SMAD3, IGF2, MALT1, VAV2, PPP1R9B, RGS4, MAPK8IP3, DGKZ, ENG	0.00118079	up
GO:0019220	regulation of phosphate metabolic process	55	ADCY3, PDGFB, TGFB3, ZEB2, PRDX2, LPAR1, PTEN, LATS1, SPRY4, EDNRA, SPRY2, EDNRB, SPRY1, APP, CASP3, CXCR4, CDKN2C, SHC1, PRKACA, SPRED1, FAM129A, PPP1R14B, CCDC88C, PRKCE, PKIA, THY1, NCK2, CCND1, ACVR2B, CCND2, PRKD3, RAD17, MAP3K11, PTPLAD1, ERBB2, PPAP2A, THBS1, AGK, MAP2K1, SPHK2, NF2, TAOK2, SMAD7, NF1, MET, YWHAB, SMAD3, IGF2, MALT1, VAV2, PPP1R9B, RGS4, MAPK8IP3, DGKZ, ENG	0.00118079	up
GO:0051173	positive regulation of nitrogen compound metabolic process	69	MEF2C, ACVRL1, THRA, PDGFB, TGFB3, TNFSF12, ZEB1, GLI2, APP, SMARCD1, SHC1, NR2F2, EGR1, TP53, ARID1A, AHR, CDK2, PRPF6, EYA3, HES1, NCOA1, VEGFA, MGEA5, PIAS2, CAND1, PIAS1, NSD1, CAMTA2, HMGB2, ING2, ABLIM3, AFAP1L2, CALR, ARNT, CHD8, RGMB, RNF168, MYOG, SUPT4H1, NFATC2, TCF4, ZNF423, KLF5, SMAD9, TBX3, MAP2K1, KLF12, VHL, TAF8, CREB1, TP53BP1, SMAD5, SMAD3, NPR1, CREB5, IGF2, SMAD2, TRIM24, SM…	0.00123536	up
GO:0001889	liver development	12	HES1, MAN2A1, CCND1, NOTCH1, CCND2, JARID2, ERBB2, SP3, NF1, ARF6, AACS, ADA	0.00131093	up
GO:0042325	regulation of phosphorylation	53	ADCY3, PDGFB, TGFB3, ZEB2, PRDX2, LPAR1, PTEN, LATS1, SPRY4, EDNRA, SPRY2, EDNRB, SPRY1, APP, CASP3, CXCR4, CDKN2C, SHC1, PRKACA, SPRED1, FAM129A, PPP1R14B, CCDC88C, PRKCE, PKIA, THY1, NCK2, CCND1, ACVR2B, CCND2, PRKD3, RAD17, MAP3K11, PTPLAD1, ERBB2, PPAP2A, THBS1, AGK, MAP2K1, SPHK2, NF2, TAOK2, SMAD7, NF1, MET, IGF2, MALT1, VAV2, PPP1R9B, RGS4, MAPK8IP3, DGKZ, ENG	0.00138831	up
GO:0035113	embryonic appendage morphogenesis	16	WNT5A, TBX3, FTO, PRRX1, GJA5, NOTCH2, NOTCH1, TULP3, GNAQ, LRP6, RAB23, PBX1, FBN2, IFT52, PBX2, LRP5	0.00145411	up
GO:0030326	embryonic limb morphogenesis	16	WNT5A, TBX3, FTO, PRRX1, GJA5, NOTCH2, NOTCH1, TULP3, GNAQ, LRP6, RAB23, PBX1, FBN2, IFT52, PBX2, LRP5	0.00145411	up
GO:0001955	blood vessel maturation	4	RECK, CD44, MMP2, CDH5	0.00146459	up
GO:0044087	regulation of cellular component biogenesis	22	TRIOBP, ACVRL1, NF2, MAP1B, TGFB3, SMAD3, ARF6, ARPC5, PTEN, LATS1, AHR, NCK2, PTK2, CDC42EP2, CDC42EP1, GSK3B, SCIN, RALA, CAND1, THBS1, RASA1, SPTAN1	0.0014679	up
GO:0051129	negative regulation of cellular component organization	22	TRIOBP, ARHGEF2, LIMA1, ARHGEF1, ACVRL1, SMAD7, MAP1A, MAP1B, KATNB1, ARF6, PTEN, TTC3, THY1, EPHB2, PTK2, MAD2L1, SCIN, DNMT1, CLASP1, THBS1, SPP1, SPTAN1	0.0014679	up
GO:0051130	positive regulation of cellular component organization	26	ARHGEF1, NF2, PLXNB2, MAP1B, KATNB1, TGFB3, SMAD3, ARF6, IGF2, PPT1, SMAD2, SMAD1, CALR, LDLRAP1, AHR, DSTN, NCK2, PLA2G4A, CDC42EP2, CDC42EP1, GSK3B, MGEA5, RALA, DNMT1, CAND1, HIP1	0.0014896	up
GO:0042060	wound healing	27	GGCX, ACVRL1, PDGFB, HPS5, ERBB2, TGFB3, ITGB3, ELK3, CD44, LOX, FN1, PLAT, GATM, EFEMP2, NF1, SMAD3, IGF2, SMAD1, NOTCH3, NOTCH2, NOTCH1, PLSCR4, GNAQ, ITGA5, ENG, PLAU, MYH10	0.00149844	up
GO:0043067	regulation of programmed cell death	83	XRCC5, MEF2C, PREX1, RBM5, TGFB3, PRDX2, TNFSF12, PTEN, EDNRB, CASP3, APP, PTGIS, CASP9, CD44, TIAM2, CDKN2C, PCBP4, NGFRAP1, DAP, DDAH2, CASP2, TOP2A, IP6K2, DHCR24, ARHGEF2, DFFA, ADAMTS20, TP53, ADNP, ARHGEF17, PRKCE, STK4, SMO, AMIGO2, IGF2R, SCIN, VEGFA, MNT, EIF2AK3, MAP3K11, CAMK1D, TRAF1, BID, ING4, ING3, YWHAZ, ERBB2, STK17B, COL2A1, PPT1, CALR, SCRIB, ADA, PEA15, CHD8, ALDH1A3, PPP2CB, …	0.00150862	up
GO:0051960	regulation of nervous system development	27	XRCC5, ZNF488, REST, GLI2, CALR, TTC3, EPHB2, PTK2, SPP1, ARHGEF1, PLXNB2, NF1, MAP1B, TP53, SMAD1, THY1, NOTCH3, HES1, SMO, NOTCH1, TULP3, CCND2, NTRK2, PBX1, TGIF2, EIF2AK3, DBN1	0.00161626	up
GO:0045449	regulation of transcription	227	MEF2C, SLC2A4RG, FST, REST, MED22, NONO, MAMSTR, APP, FLI1, TRAK2, ZFP90, CREB3L2, PATZ1, RARA, TIGD5, IKBKAP, ZNF644, RCOR1, ZNF646, ZHX1, HMG20A, HMG20B, HES1, PRDM4, RFC1, PRDM5, VEGFA, MED18, MNT, TGIF2, PIAS2, PIAS1, ZNF79, ZNF132, TADA3, GPBP1L1, ZNF133, ZNF131, AFAP1L2, CALR, ZNF512, TCF20, LYL1, HTATSF1, LEO1, TCF4, BCOR, HIP1, KLF5, ZNF623, SMAD9, KLF12, MAP2K1, SMAD7, SUB1, TP53BP1, ASX…	0.00165433	up
GO:0010941	regulation of cell death	83	XRCC5, MEF2C, PREX1, RBM5, TGFB3, PRDX2, TNFSF12, PTEN, EDNRB, CASP3, APP, PTGIS, CASP9, CD44, TIAM2, CDKN2C, PCBP4, NGFRAP1, DAP, DDAH2, CASP2, TOP2A, IP6K2, DHCR24, ARHGEF2, DFFA, ADAMTS20, TP53, ADNP, ARHGEF17, PRKCE, STK4, SMO, AMIGO2, IGF2R, SCIN, VEGFA, MNT, EIF2AK3, MAP3K11, CAMK1D, TRAF1, BID, ING4, ING3, YWHAZ, ERBB2, STK17B, COL2A1, PPT1, CALR, SCRIB, ADA, PEA15, CHD8, ALDH1A3, PPP2CB, …	0.00168963	up
GO:0000904	cell morphogenesis involved in differentiation	32	NRP2, ERBB2, PIP5K1C, GLI2, EPHB2, ALCAM, DAB2, APP, PTK2, MACF1, CXCR4, B3GNT1, SEMA3B, LAMB1, FN1, ACTB, COL18A1, PTPRM, RYK, CREB1, MAP1B, VASP, HES1, SEMA6A, NOTCH1, LAMA5, MAPK8IP3, CYFIP1, VCAN, APBB1, FEZ2, MYH10	0.00174653	up
GO:0045765	regulation of angiogenesis	13	PTPRM, ERBB2, NF1, NPR1, TNFSF12, EPHB4, STAB1, ID1, TIE1, MAPK7, THBS1, ANGPT2, HDAC7	0.00176555	up
GO:0007160	cell-matrix adhesion	16	TAOK2, ITGB3, NID2, ECM2, RAPH1, THY1, CD44, ITGA6, LAMA5, ITGAV, ITGA8, PKD2, SGCE, THBS3, ADAM15, FN1	0.00183956	up
GO:0031589	cell-substrate adhesion	17	TAOK2, ITGB3, NID2, ECM2, RAPH1, THY1, CD44, ITGA6, LAMA5, ITGAV, ITGA8, PKD2, SGCE, LAMB1, THBS3, ADAM15, FN1	0.00185528	up
GO:0032990	cell part morphogenesis	33	NRP2, ERBB2, PIP5K1C, GJA1, GLI2, EPHB2, ALCAM, APP, PTK2, MACF1, CXCR4, B3GNT1, SEMA3B, ACTB, PTPRM, MAP2K1, RYK, CREB1, MAP1B, PCM1, GAS7, VASP, SMO, BBS2, SEMA6A, NOTCH1, LAMA5, CYFIP1, MAPK8IP3, VCAN, APBB1, FEZ2, MYH10	0.00193592	up
GO:0040008	regulation of growth	41	ING4, EXTL3, ING3, ING2, ACVRL1, SIPA1, PPT1, AGTR1, APP, PTK2, DAB2, GPC3, CD44, HTRA1, CDKN2C, SHC1, BRMS1L, IP6K2, SPP1, ADAM10, TAOK2, CREB1, MAP1B, TP53, SMAD3, NPR1, IGF2, TKT, SOCS5, VEGFB, PPP1R9B, UBE2E3, PHF17, BBS2, PRDM4, CDK11B, GAMT, IGFBP2, PARP1, APBB1, IGFBP4	0.00194238	up
GO:0051276	chromosome organization	54	XRCC5, HP1BP3, ARID4B, CBX1, LATS1, CBX5, SMARCD1, TLK1, HIRIP3, KDM5B, TOP2A, RCOR1, PAPD7, TP53, HMG20A, ARID1A, HMG20B, NCAPD2, EYA3, MAD2L1, RFC1, PRDM5, JMJD1C, NSD1, ING4, HMGB2, ING3, ING2, TADA3, TSPYL4, ARID2, RPA1, CHD9, CHD8, LEO1, RNF168, SUPT4H1, CHD6, BCOR, BAZ2A, CHD3, PDS5B, NDC80, SMC3, TNKS1BP1, PHF17, HDAC2, MSL1, WHSC1L1, DNMT1, PARP1, APBB1, HDAC7, RERE	0.00197086	up
GO:0051493	regulation of cytoskeleton organization	21	TRIOBP, XPO1, ARHGEF2, LIMA1, NF2, MAP1A, MAP1B, KATNB1, SMAD3, ARF6, ARPC5, LATS1, DSTN, NCK2, CDC42EP2, MACF1, CEP250, SCIN, CLASP1, RASA1, SPTAN1	0.00201518	up
GO:0006350	transcription	187	MEF2C, SLC2A4RG, JDP2, THRA, CNOT8, RBM15B, TCEAL8, MED22, REST, CNOT6, PNN, PRIM1, NONO, MAMSTR, HOXC8, FLI1, MIER2, CGGBP1, ZFP90, MIER3, CREB3L2, PSIP1, PATZ1, RARA, IKBKAP, ZNF592, ZNF644, RCOR1, ZHX1, ZNF814, HMG20A, SIX5, HMG20B, ARID1A, AHR, HES1, PRDM4, RFC1, PRDM5, MED18, MNT, PIAS2, TGIF2, PIAS1, EID1, CAMTA2, TSHZ1, ZNF79, ZNF132, TADA3, GPBP1L1, ZNF133, ZNF131, MYEF2, ELK3, ZNF512, AT…	0.00202746	up
GO:0043009	chordate embryonic development	40	ACVRL1, NDST1, FUT8, TGFB3, PRRX1, COL2A1, ZEB2, ZEB1, GLI2, ADA, ARNT, EDNRA, RPA1, CHD8, DAB2, HOXA6, PKD2, PCSK5, ADAM10, TBX3, HTT, TAF8, TP53, SMAD2, VASP, RIC8A, FZD6, HES1, SMO, MAN2A1, TULP3, MEOX2, PLCG1, SP3, GFPT1, MAPK8IP3, PBX1, IFT52, POFUT1, MYH10	0.00203059	up
GO:0010604	positive regulation of macromolecule metabolic process	86	MEF2C, ACVRL1, THRA, PDGFB, TGFB3, GJA1, TNFSF12, ZEB1, GLI2, EDNRA, EDNRB, AGTR1, APP, SMARCD1, SHC1, PSMD5, NR2F2, FAM129A, EGR1, TP53, ARID1A, AHR, CDK2, PRPF6, EYA3, HES1, NCOA1, CCND1, CCND2, VEGFA, MGEA5, CAND1, PIAS2, PIAS1, NSD1, CAMTA2, FZR1, HMGB2, ING2, ABLIM3, AFAP1L2, CALR, SCRIB, ARNT, RGMB, CHD8, RNF168, MYOG, SUPT4H1, THBS1, NFATC2, TCF4, ZNF423, KLF5, SMAD9, TBX3, MAP2K1, KLF12, …	0.00208308	up
GO:0035239	tube morphogenesis	20	TBX3, PDPN, ZEB2, GLI2, SCRIB, VASP, FZD6, GZF1, KDR, EDNRA, SPRY2, NOTCH1, GPC3, CD44, CXCR4, LAMA5, VEGFA, PBX1, IFT52, ENG	0.00210932	up
GO:0033043	regulation of organelle organization	29	XPO1, TRIOBP, LIMA1, KATNB1, ARF6, ARPC5, LATS1, DSTN, CDC42EP2, CUL7, MACF1, CEP250, TLK1, CLASP1, RASA1, CDK13, ARHGEF2, NF2, MAP1A, MAP1B, SMAD3, IGF2, NCK2, PLA2G4A, MAD2L1, SCIN, DNMT1, NEK6, SPTAN1	0.00226799	up
GO:0030201	heparan sulfate proteoglycan metabolic process	6	CSGALNACT1, NDST1, NDST2, SULF1, EXT1, EXT2	0.00234777	up
GO:0009792	embryonic development ending in birth or egg hatching	40	ACVRL1, NDST1, FUT8, TGFB3, PRRX1, COL2A1, ZEB2, ZEB1, GLI2, ADA, ARNT, EDNRA, RPA1, CHD8, DAB2, HOXA6, PKD2, PCSK5, ADAM10, TBX3, HTT, TAF8, TP53, SMAD2, VASP, RIC8A, FZD6, HES1, SMO, MAN2A1, TULP3, MEOX2, PLCG1, SP3, GFPT1, MAPK8IP3, PBX1, IFT52, POFUT1, MYH10	0.00238568	up
GO:0001763	morphogenesis of a branching structure	14	TBX3, GLI2, GZF1, KDR, EDNRA, SPRY2, NOTCH1, GPC3, CD44, CXCR4, LAMA5, VEGFA, PBX1, ENG	0.00247823	up
GO:0045926	negative regulation of growth	18	ING4, ACVRL1, SIPA1, TP53, SMAD3, NPR1, PPT1, PPP1R9B, BBS2, PHF17, DAB2, PTK2, GPC3, PRDM4, CDKN2C, APBB1, IP6K2, SPP1	0.00249263	up
GO:0002009	morphogenesis of an epithelium	17	FRAS1, HTT, ZEB2, JAG1, GLI2, SCRIB, VASP, FZD6, GZF1, NOTCH2, GPC3, CD44, FREM2, LAMA5, ALDH1A3, PBX1, IFT52	0.00255025	up
GO:0001952	regulation of cell-matrix adhesion	8	ACVRL1, NF2, NF1, SMAD3, CDK6, THBS1, PTEN, RASA1	0.00262067	up
GO:0006491	N-glycan processing	5	MGAT4B, MAN2A1, MAN1A2, FUT8, ST8SIA4	0.00263541	up
GO:0051301	cell division	36	HAUS4, LZTS2, FZR1, TIPIN, KATNB1, SENP5, LATS1, DSTN, NDE1, CLASP1, RASA1, CDK13, CDCA3, CDC7, ARHGEF2, PDS5B, KIF11, CKAP5, PAPD7, CDK6, NDC80, CDC20, WEE1, SMC3, CDK2, TACC1, ARL3, NCAPD2, CCND1, NOTCH1, MAD2L1, CCND2, CDK11B, HAUS8, NEK6, MYH10	0.00298224	up
GO:0030182	neuron differentiation	49	NRP2, FGFR1, ERBB2, PIP5K1C, GJA1, PPT1, JAG1, GLI2, PTEN, EPHB2, ALCAM, APP, PTK2, HOXC8, MACF1, CD44, CXCR4, ATXN10, B3GNT1, SEMA3B, LAMB1, ACTB, DFNA5, PTPRM, MAP2K1, HTT, RYK, CREB1, LDB1, MAP1B, GAS7, VASP, THY1, HES1, NOTCH3, PPP1R9B, SMO, SEMA6A, NOTCH1, TULP3, GNAQ, VEGFA, NTRK2, CYFIP1, MAPK8IP3, VCAN, APBB1, FEZ2, MYH10	0.00299328	up
GO:0045216	cell-cell junction organization	9	NF2, SMAD7, TGFB3, SMAD3, GJA1, GJA4, CTNNA1, GJA5, GJC1	0.00311917	up
GO:0046777	protein amino acid autophosphorylation	15	ERBB2, TAOK3, MET, TRIM24, FER, STK4, PTK2, EIF2AK1, FYN, NTRK2, PRKACA, MAPK7, YES1, EIF2AK3, MAP3K11	0.00320559	up
GO:0043244	regulation of protein complex disassembly	11	TRIOBP, ARHGEF2, LIMA1, MAP1A, SCIN, MAP1B, MGEA5, KATNB1, CLASP1, SPTAN1, DSTN	0.00334092	up
GO:0030900	forebrain development	22	NDST1, TBX3, HTT, CREB1, NF1, ZEB2, GLI2, APLP1, NOTCH3, HES1, ATRX, BBS2, NDE1, NOTCH1, APP, GNAQ, FYN, ALDH1A3, MAPK8IP3, NR2F2, MYH10, NFIB	0.00341634	up
GO:0045664	regulation of neuron differentiation	20	ARHGEF1, PLXNB2, MAP1B, SMAD1, REST, GLI2, CALR, TTC3, THY1, EPHB2, HES1, NOTCH3, NOTCH1, PTK2, CCND2, NTRK2, PBX1, TGIF2, DBN1, SPP1	0.00358831	up
GO:0007169	transmembrane receptor protein tyrosine kinase signaling pathway	29	MTSS1, FGFR1, MPZL1, FGFR4, NDST1, PDGFB, ERBB2, EPHB4, PTEN, EPHB2, PHIP, PTK2, SHC1, TIE1, PLAT, NIN, MET, PTPRA, IGF2, SOCS5, STXBP4, KDR, NCK2, SS18, ERBB2IP, VEGFA, ARF4, NTRK2, EIF2AK3	0.00359049	up
GO:0007409	axonogenesis	26	NRP2, ACTB, PTPRM, RYK, CREB1, ERBB2, MAP1B, PIP5K1C, GLI2, VASP, EPHB2, ALCAM, SEMA6A, NOTCH1, PTK2, APP, MACF1, CXCR4, B3GNT1, CYFIP1, MAPK8IP3, VCAN, SEMA3B, APBB1, FEZ2, MYH10	0.0035994	up
GO:0051052	regulation of DNA metabolic process	18	NF2, POLH, PDGFB, IL27RA, TP53, TGFB3, TIPIN, IGF2, TNFSF12, GLI2, CALR, CDK2, EYA3, MGEA5, SHC1, RNF168, KPNA2, RAD17	0.00365095	up
GO:0001558	regulation of cell growth	26	EXTL3, ACVRL1, SIPA1, PPT1, AGTR1, DAB2, CD44, CDKN2C, HTRA1, IP6K2, SPP1, ADAM10, TAOK2, MAP1B, TP53, SMAD3, NPR1, IGF2, VEGFB, PHF17, PPP1R9B, PRDM4, CDK11B, IGFBP2, APBB1, IGFBP4	0.00385435	up
GO:0001822	kidney development	16	NF1, SMAD1, GLI2, GZF1, AGTR1, ACVR2B, SPRY1, GPC3, INVS, CD44, LAMA5, ALDH1A3, ITGA8, PKD2, PBX1, PCSK5	0.0039172	up
GO:0001953	negative regulation of cell-matrix adhesion	5	ACVRL1, NF2, THBS1, PTEN, RASA1	0.00414024	up
GO:0016049	cell growth	12	FGFR1, NOTCH2, APP, PDGFB, ERBB2IP, WHSC1L1, TGFB3, CYFIP1, SOCS5, EMP3, CSRP2, VAT1	0.00421722	up
GO:0045446	endothelial cell differentiation	6	COL18A1, LAMA5, JAG1, NR2F2, ENG, KDR	0.00453162	up
GO:0045941	positive regulation of transcription	59	MEF2C, THRA, ACVRL1, TGFB3, ZEB1, GLI2, APP, SMARCD1, NR2F2, EGR1, TP53, ARID1A, CDK2, AHR, PRPF6, HES1, NCOA1, VEGFA, PIAS2, CAND1, PIAS1, NSD1, HMGB2, CAMTA2, ING2, ABLIM3, AFAP1L2, ARNT, CHD8, RGMB, MYOG, SUPT4H1, NFATC2, TCF4, ZNF423, KLF5, SMAD9, TBX3, KLF12, VHL, TAF8, CREB1, TP53BP1, SMAD5, SMAD3, CREB5, SMAD2, TRIM24, SMAD1, NOTCH1, HDAC2, ETS1, EBF2, EBF1, PBX1, PBX2, APBB1, ENG, NFIB	0.00481895	up
GO:0051347	positive regulation of transferase activity	30	ADCY3, PDGFB, PTPLAD1, ERBB2, TGFB3, ZEB2, PRDX2, LPAR1, EDNRA, SERINC5, CXCR4, PRKACA, SHC1, PPAP2A, THBS1, AGK, TAOK2, SPHK2, MAP2K1, MET, MALT1, IGF2, VAV2, ACVR2B, CCND1, CCND2, DGKZ, MAPK8IP3, PRKD3, MAP3K11	0.00500905	up
GO:0022402	cell cycle process	59	ADCY3, LZTS2, LATS1, NDE1, APP, CEP250, PCBP4, CDKN2C, PSMD5, DHCR24, CDCA3, CDC7, ARHGEF2, KIF11, PAPD7, TP53, CDK6, WEE1, CDK2, NCAPD2, CCND1, MAD2L1, CCND2, CDK2AP1, CDK11B, HAUS8, STMN1, KPNA2, NEK6, MAP3K11, HAUS4, ING4, FZR1, KATNB1, TIPIN, POLA1, CALR, SESN3, RPA1, MACF1, PKD2, CLASP1, THBS1, PDS5B, MAP2K1, MKI67, CKAP5, SMAD3, NDC80, CDC20, GAS7, SMC3, PPP1R9B, NOTCH2, GSK3B, PSMD10, GAS2…	0.0050454	up
GO:0007044	cell-substrate junction assembly	7	ITGA6, TAOK2, ITGA5, LAMA5, ITGB3, THY1, FN1	0.00510467	up
GO:0048667	cell morphogenesis involved in neuron differentiation	27	NRP2, ACTB, PTPRM, RYK, CREB1, ERBB2, MAP1B, PIP5K1C, GLI2, VASP, EPHB2, HES1, ALCAM, SEMA6A, NOTCH1, PTK2, APP, MACF1, CXCR4, B3GNT1, CYFIP1, MAPK8IP3, VCAN, SEMA3B, APBB1, FEZ2, MYH10	0.00521783	up
GO:0048332	mesoderm morphogenesis	9	MACF1, NF2, TBX3, HTT, SMAD3, PRKACA, SMAD2, SMAD1, EXT2	0.00533729	up
GO:0043413	biopolymer glycosylation	19	MGAT4B, OSTC, GALNT1, MAN1A2, B3GALT2, FUT8, LDLR, FUT11, TSPAN7, B3GNT9, MAN2A1, ST6GALNAC6, ST6GALNAC4, GALNT10, ST3GAL5, TRAK2, ST8SIA4, B3GNT1, POFUT1	0.00533952	up
GO:0006486	protein amino acid glycosylation	19	MGAT4B, OSTC, GALNT1, MAN1A2, B3GALT2, FUT8, LDLR, FUT11, TSPAN7, B3GNT9, MAN2A1, ST6GALNAC6, ST6GALNAC4, GALNT10, ST3GAL5, TRAK2, ST8SIA4, B3GNT1, POFUT1	0.00533952	up
GO:0070085	glycosylation	19	MGAT4B, OSTC, GALNT1, MAN1A2, B3GALT2, FUT8, LDLR, FUT11, TSPAN7, B3GNT9, MAN2A1, ST6GALNAC6, ST6GALNAC4, GALNT10, ST3GAL5, TRAK2, ST8SIA4, B3GNT1, POFUT1	0.00533952	up
GO:0033674	positive regulation of kinase activity	29	ADCY3, PDGFB, PTPLAD1, ERBB2, TGFB3, ZEB2, PRDX2, LPAR1, EDNRA, CXCR4, PRKACA, SHC1, THBS1, PPAP2A, AGK, TAOK2, SPHK2, MAP2K1, MET, MALT1, IGF2, VAV2, ACVR2B, CCND1, CCND2, DGKZ, MAPK8IP3, PRKD3, MAP3K11	0.00551403	up
GO:0046578	regulation of Ras protein signal transduction	27	ARFGAP3, ERBB2, PREX1, ITPKB, CYTH2, ARF6, LPAR1, SCRIB, TBC1D16, PLEKHG3, TIAM2, PPP2CB, IQSEC1, GIT1, ARHGEF2, TBC1D2B, ARHGEF1, MAP2K1, NF1, PSD3, ARHGEF17, VAV2, TBC1D22B, DNMBP, NOTCH2, SYDE1, DGKZ	0.00555517	up
GO:0016568	chromatin modification	33	ING4, ING3, ING2, TADA3, ARID2, CHD9, CHD8, SMARCD1, LEO1, TLK1, RNF168, SUPT4H1, CHD6, BCOR, BAZ2A, KDM5B, CHD3, RCOR1, HMG20A, HMG20B, ARID1A, EYA3, PHF17, HDAC2, MSL1, WHSC1L1, PRDM5, DNMT1, JMJD1C, APBB1, NSD1, RERE, HDAC7	0.00559474	up
GO:0043065	positive regulation of apoptosis	47	BID, ING4, ING3, PREX1, RBM5, STK17B, TGFB3, TNFSF12, PTEN, SCRIB, CASP3, APP, PTGIS, CD44, CASP9, TIAM2, PCBP4, CDKN2C, ALDH1A3, NGFRAP1, DAP, CASP2, TOP2A, HIP1, IP6K2, COL18A1, ARHGEF2, HTT, DFFA, NF1, YWHAB, TP53, SMAD3, ARHGEF17, BAD, PRKCE, VAV2, STK4, NCSTN, NOTCH2, PLA2G4A, NOTCH1, ETS1, SCIN, APBB1, PDCD6, MAP3K11	0.00567857	up
GO:0010628	positive regulation of gene expression	60	MEF2C, THRA, ACVRL1, TGFB3, ZEB1, GLI2, APP, SMARCD1, NR2F2, EGR1, TP53, ARID1A, CDK2, AHR, PRPF6, HES1, NCOA1, VEGFA, PIAS2, CAND1, PIAS1, NSD1, CAMTA2, HMGB2, ING2, ABLIM3, AFAP1L2, ARNT, CHD8, RGMB, MYOG, SUPT4H1, NFATC2, TCF4, ZNF423, KLF5, SMAD9, TBX3, KLF12, VHL, TAF8, CREB1, TP53BP1, SMAD5, SMAD3, CREB5, SMAD2, TRIM24, SMAD1, NOTCH1, HDAC2, ETS1, EBF2, EBF1, DNMT1, PBX1, PBX2, APBB1, ENG, …	0.00584543	up
GO:0015012	heparan sulfate proteoglycan biosynthetic process	5	CSGALNACT1, NDST1, NDST2, EXT1, EXT2	0.00613367	up
GO:0010812	negative regulation of cell-substrate adhesion	5	ACVRL1, NF2, THBS1, PTEN, RASA1	0.00613367	up
GO:0045860	positive regulation of protein kinase activity	28	ADCY3, PDGFB, PTPLAD1, ERBB2, TGFB3, ZEB2, PRDX2, LPAR1, EDNRA, CXCR4, PRKACA, SHC1, THBS1, PPAP2A, AGK, TAOK2, SPHK2, MAP2K1, MET, MALT1, IGF2, ACVR2B, CCND1, CCND2, DGKZ, MAPK8IP3, PRKD3, MAP3K11	0.00644067	up
GO:0043068	positive regulation of programmed cell death	47	BID, ING4, ING3, PREX1, RBM5, STK17B, TGFB3, TNFSF12, PTEN, SCRIB, CASP3, APP, PTGIS, CD44, CASP9, TIAM2, PCBP4, CDKN2C, ALDH1A3, NGFRAP1, DAP, CASP2, TOP2A, HIP1, IP6K2, COL18A1, ARHGEF2, HTT, DFFA, NF1, YWHAB, TP53, SMAD3, ARHGEF17, BAD, PRKCE, VAV2, STK4, NCSTN, NOTCH2, PLA2G4A, NOTCH1, ETS1, SCIN, APBB1, PDCD6, MAP3K11	0.00644402	up
GO:0010557	positive regulation of macromolecule biosynthetic process	66	MEF2C, THRA, ACVRL1, PDGFB, TGFB3, ZEB1, GLI2, APP, SMARCD1, SHC1, NR2F2, FAM129A, EGR1, TP53, ARID1A, AHR, CDK2, PRPF6, HES1, NCOA1, VEGFA, PIAS2, CAND1, PIAS1, NSD1, CAMTA2, HMGB2, ING2, ABLIM3, AFAP1L2, CALR, ARNT, CHD8, RGMB, MYOG, SUPT4H1, NFATC2, TCF4, THBS1, ZNF423, KLF5, SMAD9, TBX3, KLF12, VHL, TAF8, CREB1, TP53BP1, SMAD5, CD276, SMAD3, CREB5, IGF2, SMAD2, TRIM24, SMAD1, NOTCH1, HDAC2, E…	0.00650393	up
GO:0043405	regulation of MAP kinase activity	20	MAP2K1, PDGFB, PTPLAD1, ERBB2, NF1, MET, TGFB3, ZEB2, PRDX2, LPAR1, SPRY4, SPRY2, SPRY1, CXCR4, RGS4, MAPK8IP3, SHC1, SPRED1, THBS1, MAP3K11	0.00681122	up
GO:0070482	response to oxygen levels	20	PLAT, SMAD9, PDGFB, PDPN, VHL, NF1, TGFB3, SMAD3, MMP2, ADA, ARNT, EDNRA, HSP90B1, PLOD1, CXCR4, PLOD2, VEGFA, THBS1, ENG, PLAU	0.00681122	up
GO:0010942	positive regulation of cell death	47	BID, ING4, ING3, PREX1, RBM5, STK17B, TGFB3, TNFSF12, PTEN, SCRIB, CASP3, APP, PTGIS, CD44, CASP9, TIAM2, PCBP4, CDKN2C, ALDH1A3, NGFRAP1, DAP, CASP2, TOP2A, HIP1, IP6K2, COL18A1, ARHGEF2, HTT, DFFA, NF1, YWHAB, TP53, SMAD3, ARHGEF17, BAD, PRKCE, VAV2, STK4, NCSTN, NOTCH2, PLA2G4A, NOTCH1, ETS1, SCIN, APBB1, PDCD6, MAP3K11	0.00696908	up
GO:0001936	regulation of endothelial cell proliferation	8	PTPRM, PDGFB, NF1, VEGFA, TNFSF12, THBS1, ENG, ARNT	0.00722001	up
GO:0060021	palate development	8	ACVR2B, TSHZ1, MEOX2, PRRX1, TGFB3, SMAD2, COL2A1, BCOR	0.00722001	up
GO:0030336	negative regulation of cell migration	11	PTPRM, ACVRL1, NF2, PDGFB, SMAD7, NF1, TIE1, THBS1, PTEN, ADA, THY1	0.00760224	up
GO:0007050	cell cycle arrest	16	ING4, TP53, SMAD3, CALR, GAS7, SESN3, PPP1R9B, NOTCH2, MACF1, CDKN2C, PCBP4, PKD2, GAS2L1, THBS1, APBB1, DHCR24	0.00760799	up
GO:0000165	MAPKKK cascade	24	WNT5A, FGFR1, MAP2K1, TAOK2, NDST1, PTPLAD1, NF1, TAOK3, MET, TGFB3, IGF2, ITPKB, PRDX2, LPAR1, SMAD1, MAP4K3, CXCR4, RGS4, MAPK8IP3, SHC1, SPRED1, MAPK7, THBS1, MAP3K11	0.00782525	up
GO:0042733	embryonic digit morphogenesis	7	TULP3, GNAQ, TBX3, LRP6, RAB23, IFT52, LRP5	0.00790326	up
GO:0010594	regulation of endothelial cell migration	7	PTPRM, ACVRL1, PDGFB, NF1, VEGFA, THBS1, HDAC7	0.00790326	up
GO:0000278	mitotic cell cycle	41	HAUS4, LZTS2, FZR1, POLA1, TIPIN, KATNB1, LATS1, APP, NDE1, CEP250, CDKN2C, CLASP1, PSMD5, CDCA3, CDC7, ARHGEF2, PDS5B, KIF11, MAP2K1, CKAP5, PAPD7, CDK6, NDC80, CDC20, WEE1, SMC3, CDK2, NCAPD2, CCND1, MAD2L1, PLK2, CCND2, PSMD10, PRDM5, CDK2AP1, CDK11B, HAUS8, STMN1, KPNA2, NEK6, MAP3K11	0.00803067	up
GO:0007243	protein kinase cascade	41	WNT5A, FGFR1, NDST1, PTPLAD1, ERBB2, STK17B, TGFB3, PRDX2, ITPKB, LPAR1, PRKCSH, CXCR4, TICAM2, PKD2, PRKACA, SHC1, SPRED1, THBS1, SRPK2, IKBKAP, MAP2K1, TAOK2, NF1, TAOK3, MET, MALT1, IGF2, SMAD1, STK4, SRPK1, IFNAR1, MAP4K3, IFNAR2, SS18, ICK, FYN, RGS4, MAPK8IP3, PIAS1, MAPK7, MAP3K11	0.00803067	up
GO:0031328	positive regulation of cellular biosynthetic process	68	MEF2C, ACVRL1, THRA, PDGFB, TGFB3, ZEB1, GLI2, APP, SMARCD1, SHC1, NR2F2, FAM129A, EGR1, TP53, ARID1A, AHR, CDK2, PRPF6, HES1, NCOA1, VEGFA, PIAS2, CAND1, PIAS1, NSD1, CAMTA2, HMGB2, ING2, ABLIM3, AFAP1L2, CALR, ARNT, CHD8, RGMB, MYOG, SUPT4H1, NFATC2, TCF4, THBS1, ZNF423, KLF5, SMAD9, TBX3, KLF12, VHL, TAF8, CREB1, TP53BP1, SMAD5, CD276, SMAD3, NPR1, CREB5, IGF2, SMAD2, TRIM24, SMAD1, PLA2G4A, N…	0.00818525	up
GO:0032844	regulation of homeostatic process	17	SMAD7, LDB1, NF1, CDK6, ADA, ARNT, THY1, EDNRA, AGTR1, PLA2G4A, CD44, ETS1, VEGFA, MGEA5, PKD2, EIF2AK3, SPP1	0.00848938	up
GO:0001666	response to hypoxia	19	PLAT, SMAD9, PDGFB, VHL, NF1, TGFB3, SMAD3, MMP2, ADA, ARNT, EDNRA, HSP90B1, PLOD1, CXCR4, PLOD2, VEGFA, THBS1, ENG, PLAU	0.00857102	up
GO:0032583	regulation of gene-specific transcription	19	MEF2C, HMGB2, THRA, SMAD7, CREB1, TP53, TGFB3, SMAD3, IGF2, SMAD2, ARNT, HES1, NOTCH1, HDAC2, ETS1, PEX14, BCOR, NR2F2, ENG	0.00857102	up
GO:0043242	negative regulation of protein complex disassembly	9	TRIOBP, ARHGEF2, LIMA1, MAP1A, SCIN, MAP1B, KATNB1, CLASP1, SPTAN1	0.00859364	up
GO:0001570	vasculogenesis	9	SMO, PTK2, CUL7, VEGFA, NTRK2, ENG, RASA1, KDR, GJC1	0.00859364	up
GO:0003002	regionalization	25	TSHZ1, ZEB2, GLI2, HOXC8, HOXA6, RAB23, NR2F2, PCSK5, MLLT3, TBX3, HTT, LDB1, SMAD2, HES1, SMO, NOTCH1, ACVR2B, TULP3, MEOX2, LRP6, PBX1, IFT52, POFUT1, PBX2, LRP5	0.00912893	up
GO:0001701	in utero embryonic development	23	ADAM10, ACVRL1, FUT8, TBX3, TAF8, TP53, TGFB3, SMAD2, ADA, ARNT, RIC8A, RPA1, HES1, EDNRA, MAN2A1, DAB2, CHD8, TULP3, PLCG1, SP3, PKD2, MAPK8IP3, MYH10	0.00915677	up
GO:0009967	positive regulation of signal transduction	34	ING2, SLC44A2, ACVRL1, ERBB2, TGFB3, PRRX1, TSPAN6, GJA1, AFAP1L2, ZEB2, ITPKB, JAG1, LPAR1, ADA, ARNT, GPC3, TICAM2, RHOC, THBS1, TAOK2, ADAMTS20, TAOK3, MALT1, IGF2, WLS, NOTCH2, ACVR2B, PLK2, ITGA8, MIB2, VEGFA, SEMA4C, ENG, NEK6	0.00930127	up
GO:0006886	intracellular protein transport	41	BID, XPO1, YWHAZ, ARFGAP3, AP1G1, TGFB3, KATNB1, AKAP12, PEX6, CTSA, CALR, SEC62, AP2B1, AP1S2, MACF1, TRAK2, AP3M1, HOMER3, PEX14, TLK1, APPBP2, TNPO1, SEC23A, STX6, ARHGEF2, TAOK2, HTT, IPO11, YWHAB, TP53, VPS41, STXBP4, PPIH, SEC61B, ERBB2IP, GSK3B, YWHAQ, MGEA5, PTTG1IP, KPNA2, RERE	0.00951272	up
GO:0010769	regulation of cell morphogenesis involved in differentiation	13	PTK2, ARHGEF1, SMAD7, PLXNB2, MAP1B, TGFB3, SMAD3, SMAD2, SMAD1, TTC3, EPHB2, SPP1, THY1	0.00953124	up
GO:0051056	regulation of small GTPase mediated signal transduction	30	ARFGAP3, PREX1, ERBB2, SIPA1, ITPKB, CYTH2, ARF6, LPAR1, RGL1, SCRIB, TBC1D16, PLEKHG3, TIAM2, PPP2CB, IQSEC1, RASA1, GIT1, ARHGEF2, TBC1D2B, ARHGEF1, MAP2K1, NF1, PSD3, ARHGEF17, VAV2, TBC1D22B, DNMBP, NOTCH2, SYDE1, DGKZ	0.00974727	up
GO:0043193	positive regulation of gene-specific transcription	14	MEF2C, HES1, HMGB2, NOTCH1, HDAC2, ETS1, CREB1, TGFB3, TP53, SMAD3, SMAD2, NR2F2, ENG, ARNT	0.0101169	up
GO:0046907	intracellular transport	65	ARSB, XPO1, SEC31A, AP1G1, RBM15B, WASF2, USE1, PEX6, TGFB3, NDE1, AP2B1, APP, AP1S2, TRAK2, HOMER3, TLK1, STX6, SEC23A, ARHGEF2, MYH3, TP53, VPS41, STXBP4, ERGIC1, ANKRD27, SEC61B, NPC2, AAAS, ARRB1, MGEA5, CAMK1, KPNA2, COPE, BID, YWHAZ, ARFGAP3, AKAP12, KATNB1, MYO9B, CTSA, CALR, SEC62, MACF1, AP3M1, PEX14, SNAP23, APPBP2, TNPO1, ACTC1, MAP2K1, TAOK2, HTT, IPO11, YWHAB, MALT1, COG5, PPIH, SCFD…	0.0104123	up
GO:0007411	axon guidance	16	NRP2, PTPRM, ERBB2, GLI2, VASP, EPHB2, ALCAM, SEMA6A, APP, CXCR4, B3GNT1, MAPK8IP3, SEMA3B, APBB1, FEZ2, MYH10	0.010724	up
GO:0010720	positive regulation of cell development	12	XRCC5, SMO, ZNF488, NOTCH1, ARHGEF1, PLXNB2, MAP1B, TGFB3, SMAD3, SMAD2, SMAD1, EPHB2	0.0108252	up
GO:0009891	positive regulation of biosynthetic process	68	MEF2C, ACVRL1, THRA, PDGFB, TGFB3, ZEB1, GLI2, APP, SMARCD1, SHC1, NR2F2, FAM129A, EGR1, TP53, ARID1A, AHR, CDK2, PRPF6, HES1, NCOA1, VEGFA, PIAS2, CAND1, PIAS1, NSD1, CAMTA2, HMGB2, ING2, ABLIM3, AFAP1L2, CALR, ARNT, CHD8, RGMB, MYOG, SUPT4H1, NFATC2, TCF4, THBS1, ZNF423, KLF5, SMAD9, TBX3, KLF12, VHL, TAF8, CREB1, TP53BP1, SMAD5, CD276, SMAD3, NPR1, CREB5, IGF2, SMAD2, TRIM24, SMAD1, PLA2G4A, N…	0.0111352	up
GO:0006260	DNA replication	24	CDC7, ING4, HMGB2, POLH, PDGFB, GINS4, PAPD7, TIPIN, POLA1, MCM3, CDK2, MCM6, RPA1, PRIM1, TNKS1BP1, RFC5, RFC1, RFC2, POLD2, CDK2AP1, TOP2A, NFIA, RAD17, NFIB	0.0113426	up
GO:0007162	negative regulation of cell adhesion	9	ADAM10, ACVRL1, MAP2K1, NF2, TGFBI, SIPA1, THBS1, PTEN, RASA1	0.0114684	up
GO:0007229	integrin-mediated signaling pathway	12	ITGA9, PTK2, ADAM10, FUT8, ITGA6, ERBB2IP, ITGA5, LAMA5, ITGA8, ITGAV, ITGB3, COL16A1	0.0120228	up
GO:0030705	cytoskeleton-dependent intracellular transport	10	APP, NDE1, ACTC1, MACF1, MAP2K1, HTT, MYH3, WASF2, MYO9B, MYH10	0.0120785	up
GO:0006915	apoptosis	60	MEF2C, SGPP1, PREX1, RBM5, GJA1, TNFSF12, PTEN, CASP3, APP, CASP9, TIAM2, CXCR4, SHARPIN, NGFRAP1, DAP, TOP2A, CASP2, LUC7L3, DHCR24, MAGI3, ARHGEF2, DFFA, TP53, ARHGEF17, STK4, AHR, CDK11B, MAPK7, EIF2AK3, NEK6, TRAF1, BID, ING4, STK17B, ARF6, PPT1, SCRIB, APLP1, PEA15, PEG10, THBS1, TRAF4, HIP1, CKAP2, ACTC1, TAOK2, HTT, RYBP, YWHAB, SMAD3, FAM188A, BAD, VAV2, DNASE2, NCSTN, PHF17, SEMA6A, SULF…	0.0121233	up
GO:0031344	regulation of cell projection organization	14	ARHGEF1, PLXNB2, MAP1B, TGFB3, SMAD1, THY1, EPHB2, PTK2, CDC42EP2, CDC42EP1, NTRK2, RALA, DBN1, SPP1	0.0121613	up
GO:0040013	negative regulation of locomotion	11	PTPRM, ACVRL1, NF2, PDGFB, SMAD7, NF1, TIE1, THBS1, PTEN, ADA, THY1	0.0122104	up
GO:0008064	regulation of actin polymerization or depolymerization	11	TRIOBP, NCK2, CDC42EP2, LIMA1, SCIN, ARF6, ARPC5, LATS1, RASA1, SPTAN1, DSTN	0.0122104	up
GO:0045165	cell fate commitment	19	FGFR4, SMAD5, TP53, MYEF2, SMAD2, JAG1, SMAD1, GLI2, KDR, NOTCH3, HES1, NOTCH2, SMO, SPRY2, CASP3, NOTCH1, SPRY1, CDON, NR2F2	0.0123272	up
GO:0043085	positive regulation of catalytic activity	53	ADCY3, PDGFB, TGFB3, PRDX2, ZEB2, LPAR1, EDNRA, AGTR1, EDNRB, CASP9, CXCR4, PRKACA, SHC1, CAP1, CALCRL, PSMD5, TP53, THY1, CCND1, ACVR2B, GNAQ, CCND2, GNB1, EIF2AK3, PRKD3, MAP3K11, FZR1, MYL4, PTPLAD1, ERBB2, SCRIB, SERINC5, PPAP2A, THBS1, AGK, HIP1, MAP2K1, SPHK2, TAOK2, NF1, MET, YWHAB, SMAD3, IGF2, MALT1, CDC20, VAV2, NCSTN, SYDE1, PSMD10, NTRK2, MAPK8IP3, DGKZ	0.0124624	up
GO:0048593	camera-type eye morphogenesis	9	PTPRM, ALDH1A3, PVRL3, SP3, NF1, VEGFA, ZEB1, EPHB2, THY1	0.0131457	up
GO:0009952	anterior/posterior pattern formation	19	TSHZ1, TBX3, HTT, LDB1, ZEB2, SMAD2, HES1, ACVR2B, HOXC8, NOTCH1, MEOX2, HOXA6, LRP6, PBX1, NR2F2, POFUT1, PCSK5, MLLT3, LRP5	0.0132147	up
GO:0006275	regulation of DNA replication	11	NF2, PDGFB, TGFB3, TIPIN, TP53, IGF2, SHC1, GLI2, CALR, RAD17, CDK2	0.013636	up
GO:0001655	urogenital system development	16	NF1, SMAD1, GLI2, GZF1, AGTR1, ACVR2B, SPRY1, GPC3, INVS, CD44, LAMA5, ALDH1A3, ITGA8, PKD2, PBX1, PCSK5	0.0136591	up
GO:0048568	embryonic organ development	22	TSHZ1, NDST1, PRRX1, TGFB3, COL2A1, ZEB1, GLI2, ADA, ARNT, FZD6, SPRY2, TULP3, HOXA6, ALDH1A3, SP3, ITGA8, GFPT1, VEGFA, PKD2, SH2B3, PBX1, PCSK5	0.0137829	up
GO:0007585	respiratory gaseous exchange	8	EDNRA, MAN2A1, NDST1, MAN1A2, FUT8, ADH5, MAPK8IP3, TRAF4	0.013896	up
GO:0001707	mesoderm formation	8	MACF1, NF2, HTT, SMAD3, PRKACA, SMAD2, SMAD1, EXT2	0.013896	up
GO:0010811	positive regulation of cell-substrate adhesion	7	SMOC1, SMAD3, CDK6, ECM2, THBS1, EMILIN1, SPP1	0.0139495	up
GO:0045786	negative regulation of cell cycle	13	SIPA1, TP53, SMAD3, CDK6, LATS1, SCRIB, CASP3, HDAC2, MAD2L1, PRDM4, ETS1, DGKZ, APBB1	0.0140613	up
GO:0040007	growth	23	FGFR1, PDGFB, GATM, TAF8, TGFB3, SMAD2, SOCS5, GLI2, CSRP2, VAT1, NOTCH3, NOTCH2, SMO, ACVR2B, NOTCH1, APP, ERBB2IP, WHSC1L1, CYFIP1, CHRND, EMP3, PLAU, BMP5	0.0140904	up
GO:0048702	embryonic neurocranium morphogenesis	3	TULP3, NDST1, TGFB3	0.0151798	up
GO:0051271	negative regulation of cell motion	11	PTPRM, ACVRL1, NF2, PDGFB, SMAD7, NF1, TIE1, THBS1, PTEN, ADA, THY1	0.0151827	up
GO:0030832	regulation of actin filament length	11	TRIOBP, NCK2, CDC42EP2, LIMA1, SCIN, ARF6, ARPC5, LATS1, RASA1, SPTAN1, DSTN	0.0151827	up
GO:0042476	odontogenesis	10	SMO, ACVR2B, NF2, ITGA6, LAMA5, FST, TGFB3, BCOR, LAMB1, GLI2	0.0153357	up
GO:0030865	cortical cytoskeleton organization	5	EPB41L2, LASP1, ARF6, CALR, EHD2	0.0156057	up
GO:0030308	negative regulation of cell growth	14	ACVRL1, SIPA1, TP53, SMAD3, NPR1, PPT1, PHF17, PPP1R9B, DAB2, PRDM4, CDKN2C, APBB1, IP6K2, SPP1	0.0158086	up
GO:0012501	programmed cell death	60	MEF2C, SGPP1, PREX1, RBM5, GJA1, TNFSF12, PTEN, CASP3, APP, CASP9, TIAM2, CXCR4, SHARPIN, NGFRAP1, DAP, TOP2A, CASP2, LUC7L3, DHCR24, MAGI3, ARHGEF2, DFFA, TP53, ARHGEF17, STK4, AHR, CDK11B, MAPK7, EIF2AK3, NEK6, TRAF1, BID, ING4, STK17B, ARF6, PPT1, SCRIB, APLP1, PEA15, PEG10, THBS1, TRAF4, HIP1, CKAP2, ACTC1, TAOK2, HTT, RYBP, YWHAB, SMAD3, FAM188A, BAD, VAV2, DNASE2, NCSTN, PHF17, SEMA6A, SULF…	0.0161844	up
GO:0007423	sensory organ development	27	TSHZ1, ERBB2, PRRX1, TGFB3, COL2A1, ZEB1, JAG1, EPHB2, SPRY2, ALDH1A3, PVRL3, DFNA5, PTPRM, NF1, SIX5, COL5A2, FZD6, THY1, HES1, TULP3, SP3, ITGA8, VEGFA, NTRK2, TGIF2, MAB21L1, MYH10	0.0162582	up
GO:0051893	regulation of focal adhesion formation	4	ACVRL1, SMAD3, THBS1, PTEN	0.0164185	up
GO:0051254	positive regulation of RNA metabolic process	49	MEF2C, THRA, TGFB3, ZEB1, GLI2, APP, SMARCD1, NR2F2, EGR1, TP53, ARID1A, AHR, PRPF6, HES1, NCOA1, VEGFA, CAND1, PIAS2, PIAS1, NSD1, CAMTA2, HMGB2, ABLIM3, AFAP1L2, ARNT, CHD8, MYOG, SUPT4H1, TCF4, NFATC2, TBX3, MAP2K1, KLF12, TP53BP1, TAF8, CREB1, SMAD5, SMAD3, CREB5, SMAD2, SMAD1, NOTCH1, HDAC2, ETS1, PBX1, ENG, PBX2, APBB1, NFIB	0.0165089	up
GO:0030199	collagen fibril organization	7	NF1, COL12A1, COL2A1, LOX, COL5A2, ADAMTS2, ANXA2	0.0165311	up
GO:0034613	cellular protein localization	43	BID, XPO1, YWHAZ, ARFGAP3, AP1G1, TGFB3, KATNB1, AKAP12, PEX6, CTSA, CALR, SEC62, AP2B1, AP1S2, MACF1, TRAK2, AP3M1, HOMER3, PEX14, TLK1, APPBP2, TNPO1, SEC23A, STX6, ARHGEF2, TAOK2, HTT, IPO11, YWHAB, TP53, VPS41, STXBP4, BBS2, PPIH, SEC61B, ERBB2IP, ID1, GSK3B, YWHAQ, MGEA5, PTTG1IP, KPNA2, RERE	0.0166556	up
GO:0030031	cell projection assembly	13	KLF5, NCK2, MTSS1, BBS2, ITGA6, PDGFB, LAMA5, WASF2, CYFIP1, LPAR1, VAV2, PCM1, MYH10	0.0168645	up
GO:0051252	regulation of RNA metabolic process	156	MEF2C, SLC2A4RG, JDP2, THRA, CNOT8, RBM15B, FST, RBM5, TGFB3, MED22, REST, CBX5, APP, HOXC8, FLI1, TRAK2, ZFP90, SMARCD1, CREB3L2, PATZ1, RARA, IKBKAP, ZHX1, ZNF814, HMG20A, SIX5, HMG20B, ARID1A, PKIA, AHR, HES1, VEGFA, MED18, MNT, TGIF2, PIAS2, PIAS1, EID1, CAMTA2, HMGB2, TSHZ1, ZNF79, ZNF132, TADA3, ZNF133, ZNF131, AFAP1L2, ELK3, CALR, ATF2, CXXC1, ARNT, TCF20, HOXA6, HTATSF1, SKIL, TCF4, BCOR,…	0.0168748	up
GO:0051726	regulation of cell cycle	36	XPO1, FZR1, SIPA1, TIPIN, AFAP1L2, CALR, LATS1, PTEN, SCRIB, CSNK2A2, APP, CASP3, CUL7, PCBP4, CDKN2C, CDK13, CDC7, TBX3, TP53, SMAD3, CDK6, IGF2, PKIA, CDK2, PPP1R9B, CCND1, HDAC2, MAD2L1, PRDM4, CCND2, ETS1, MNT, DGKZ, APBB1, RAD17, NEK6	0.0171646	up
GO:0043066	negative regulation of apoptosis	38	MEF2C, XRCC5, YWHAZ, ERBB2, TGFB3, PRDX2, PPT1, COL2A1, PTEN, ADA, PEA15, EDNRB, CASP3, CHD8, PPP2CB, DDAH2, THBS1, CASP2, RASA1, DHCR24, SPHK2, TBX3, HTT, DFFA, ADAMTS20, VHL, ADNP, TP53, SMAD3, MALT1, IGF2, NOTCH2, SMO, AMIGO2, HSP90B1, NOTCH1, GSK3B, VEGFA	0.017171	up
GO:0006325	chromatin organization	40	ING4, HMGB2, ING3, ING2, TADA3, HP1BP3, ARID4B, CBX1, TSPYL4, ARID2, CBX5, CHD9, CHD8, SMARCD1, LEO1, HIRIP3, RNF168, TLK1, SUPT4H1, CHD6, BCOR, BAZ2A, KDM5B, CHD3, RCOR1, HMG20A, HMG20B, ARID1A, EYA3, PHF17, HDAC2, MSL1, WHSC1L1, PRDM5, DNMT1, JMJD1C, APBB1, NSD1, HDAC7, RERE	0.0179331	up
GO:0070727	cellular macromolecule localization	43	BID, XPO1, YWHAZ, ARFGAP3, AP1G1, TGFB3, KATNB1, AKAP12, PEX6, CTSA, CALR, SEC62, AP2B1, AP1S2, MACF1, TRAK2, AP3M1, HOMER3, PEX14, TLK1, APPBP2, TNPO1, SEC23A, STX6, ARHGEF2, TAOK2, HTT, IPO11, YWHAB, TP53, VPS41, STXBP4, BBS2, PPIH, SEC61B, ERBB2IP, ID1, GSK3B, YWHAQ, MGEA5, PTTG1IP, KPNA2, RERE	0.0186268	up
GO:0009968	negative regulation of signal transduction	26	TGFB3, PRDX2, CALR, PTEN, ADA, CHD8, PEG10, HTRA1, PPP2CB, SKIL, THBS1, NF2, SMAD7, NF1, TAOK3, RGS19, SOCS5, TAX1BP3, THY1, DKK3, CCND1, TULP3, RGS4, LRP6, DGKZ, ENG	0.018958	up
GO:0015031	protein transport	72	XPO1, SEC31A, AP1G1, VPS52, USE1, PEX6, TGFB3, AP2B1, AP1S2, TRAK2, HOMER3, RANBP6, NECAP2, RAB23, TLK1, STX6, SEC23A, KDELR3, ARHGEF2, TP53, VPS41, STXBP4, RAB11FIP2, SEC61B, MGEA5, KPNA2, COPE, FRAS1, BID, ARFGAP3, YWHAZ, AKAP12, KATNB1, NUP93, PPT1, CTSA, SNX4, ARF6, CALR, SEC62, MACF1, AP3M1, TMED3, PEX14, SNAP23, APPBP2, PCSK5, TNPO1, EXOC2, RAB2B, RAB8B, MYO1C, TAOK2, HTT, RRBP1, IPO11, RUF…	0.0190761	up
GO:0051054	positive regulation of DNA metabolic process	10	EYA3, PDGFB, TGFB3, MGEA5, RNF168, IGF2, SHC1, TNFSF12, GLI2, CALR	0.0191962	up
GO:0043069	negative regulation of programmed cell death	38	MEF2C, XRCC5, YWHAZ, ERBB2, TGFB3, PRDX2, PPT1, COL2A1, PTEN, ADA, PEA15, EDNRB, CASP3, CHD8, PPP2CB, DDAH2, THBS1, CASP2, RASA1, DHCR24, SPHK2, TBX3, HTT, DFFA, ADAMTS20, VHL, ADNP, TP53, SMAD3, MALT1, IGF2, NOTCH2, SMO, AMIGO2, HSP90B1, NOTCH1, GSK3B, VEGFA	0.0209269	up
GO:0006355	regulation of transcription, DNA-dependent	152	MEF2C, SLC2A4RG, JDP2, THRA, CNOT8, FST, TGFB3, MED22, REST, CBX5, APP, HOXC8, FLI1, TRAK2, ZFP90, SMARCD1, CREB3L2, PATZ1, RARA, IKBKAP, ZHX1, ZNF814, HMG20A, SIX5, HMG20B, ARID1A, PKIA, AHR, HES1, VEGFA, MED18, MNT, TGIF2, PIAS2, PIAS1, EID1, CAMTA2, HMGB2, TSHZ1, ZNF79, ZNF132, TADA3, ZNF133, ZNF131, AFAP1L2, ELK3, CALR, ATF2, CXXC1, ARNT, TCF20, HOXA6, HTATSF1, SKIL, TCF4, BCOR, KLF5, TAF4, S…	0.0212723	up
GO:0010552	positive regulation of specific transcription from RNA polymerase II promoter	10	MEF2C, HES1, HMGB2, NOTCH1, HDAC2, ETS1, CREB1, TP53, SMAD3, ENG	0.0213701	up
GO:0045893	positive regulation of transcription, DNA-dependent	48	MEF2C, HMGB2, CAMTA2, THRA, ABLIM3, TGFB3, AFAP1L2, ZEB1, GLI2, ARNT, CHD8, APP, SMARCD1, MYOG, SUPT4H1, TCF4, NR2F2, NFATC2, EGR1, KLF12, TBX3, CREB1, TAF8, TP53BP1, SMAD5, TP53, SMAD3, ARID1A, SMAD2, CREB5, SMAD1, AHR, PRPF6, HES1, NOTCH1, NCOA1, HDAC2, ETS1, VEGFA, PBX1, PIAS2, CAND1, PIAS1, APBB1, NSD1, PBX2, ENG, NFIB	0.0215512	up
GO:0060548	negative regulation of cell death	38	MEF2C, XRCC5, YWHAZ, ERBB2, TGFB3, PRDX2, PPT1, COL2A1, PTEN, ADA, PEA15, EDNRB, CASP3, CHD8, PPP2CB, DDAH2, THBS1, CASP2, RASA1, DHCR24, SPHK2, TBX3, HTT, DFFA, ADAMTS20, VHL, ADNP, TP53, SMAD3, MALT1, IGF2, NOTCH2, SMO, AMIGO2, HSP90B1, NOTCH1, GSK3B, VEGFA	0.0216336	up
GO:0010721	negative regulation of cell development	9	PTK2, ARHGEF1, SMAD7, NF1, TP53, TTC3, EPHB2, SPP1, THY1	0.0216706	up
GO:0032269	negative regulation of cellular protein metabolic process	22	FZR1, NF2, SMAD7, YWHAB, IGF2, IGF2BP2, CDC20, ITGB3, CALR, EIF2AK1, MAD2L1, PSMD10, ITGAV, RAB23, MGEA5, DNMT1, PSMD5, FAM129A, THBS1, ENG, EIF2AK3, EIF2AK4	0.0219602	up
GO:0045184	establishment of protein localization	72	XPO1, SEC31A, AP1G1, VPS52, USE1, PEX6, TGFB3, AP2B1, AP1S2, TRAK2, HOMER3, RANBP6, NECAP2, RAB23, TLK1, STX6, SEC23A, KDELR3, ARHGEF2, TP53, VPS41, STXBP4, RAB11FIP2, SEC61B, MGEA5, KPNA2, COPE, FRAS1, BID, ARFGAP3, YWHAZ, AKAP12, KATNB1, NUP93, PPT1, CTSA, SNX4, ARF6, CALR, SEC62, MACF1, AP3M1, TMED3, PEX14, SNAP23, APPBP2, PCSK5, TNPO1, EXOC2, RAB2B, RAB8B, MYO1C, TAOK2, HTT, RRBP1, IPO11, RUF…	0.0228076	up
GO:0006023	aminoglycan biosynthetic process	6	CSGALNACT1, XYLT2, XYLT1, B3GNT1, EXT1, EXT2	0.0228296	up
GO:0016525	negative regulation of angiogenesis	6	PTPRM, STAB1, NPR1, TIE1, THBS1, ANGPT2	0.0228296	up
GO:0001755	neural crest cell migration	6	NRP2, SMO, EDNRB, LAMA5, SEMA3C, ZEB2	0.0228296	up
GO:0010717	regulation of epithelial to mesenchymal transition	4	SMAD7, TGFB3, SMAD3, SMAD2	0.02331	up
GO:0031076	embryonic camera-type eye development	4	TULP3, ALDH1A3, SP3, ZEB1	0.02331	up
GO:0043536	positive regulation of blood vessel endothelial cell migration	4	PDGFB, VEGFA, THBS1, HDAC7	0.02331	up
GO:0006261	DNA-dependent DNA replication	10	RPA1, PRIM1, HMGB2, RFC1, POLD2, CDK2AP1, POLA1, TIPIN, MCM3, MCM6	0.0237153	up
GO:0010648	negative regulation of cell communication	28	GNAI3, TGFB3, PRDX2, CALR, PTEN, ADA, CHD8, PEG10, BCHE, HTRA1, PPP2CB, SKIL, THBS1, NF2, SMAD7, NF1, TAOK3, RGS19, SOCS5, TAX1BP3, THY1, DKK3, CCND1, TULP3, RGS4, LRP6, DGKZ, ENG	0.023804	up
GO:0001704	formation of primary germ layer	8	MACF1, NF2, HTT, SMAD3, PRKACA, SMAD2, SMAD1, EXT2	0.0241215	up
GO:0032886	regulation of microtubule-based process	9	XPO1, BBS2, ARHGEF2, MACF1, CEP250, MAP1A, MAP1B, KATNB1, CLASP1	0.0242995	up
GO:0010647	positive regulation of cell communication	35	ING2, SLC44A2, ACVRL1, ERBB2, TGFB3, PRRX1, TSPAN6, GJA1, AFAP1L2, ZEB2, ITPKB, JAG1, LPAR1, ADA, ARNT, GPC3, TICAM2, RHOC, THBS1, TAOK2, ADAMTS20, TAOK3, MALT1, IGF2, WLS, NOTCH2, ACVR2B, PLK2, ITGA8, MIB2, VEGFA, NTRK2, SEMA4C, ENG, NEK6	0.0251715	up
GO:0031114	regulation of microtubule depolymerization	5	ARHGEF2, MAP1A, MAP1B, KATNB1, CLASP1	0.0252575	up
GO:0043535	regulation of blood vessel endothelial cell migration	5	PDGFB, NF1, VEGFA, THBS1, HDAC7	0.0252575	up
GO:0007026	negative regulation of microtubule depolymerization	5	ARHGEF2, MAP1A, MAP1B, KATNB1, CLASP1	0.0252575	up
GO:0007584	response to nutrient	18	ARSB, GATM, MAP1B, CLIC1, ENSA, PTEN, TULP4, CCND1, PLA2G4A, CD44, BCHE, RARA, TIE1, DDAH2, AACS, IGFBP2, MEST, SPP1	0.0261487	up
GO:0051297	centrosome organization	7	HAUS4, NDE1, KIF11, CEP250, CKAP5, HAUS8, PCM1	0.0262022	up
GO:0048592	eye morphogenesis	11	PTPRM, ALDH1A3, PVRL3, SP3, NF1, VEGFA, NTRK2, ZEB1, COL5A2, EPHB2, THY1	0.0273222	up
GO:0045792	negative regulation of cell size	14	ACVRL1, SIPA1, TP53, SMAD3, NPR1, PPT1, PHF17, PPP1R9B, DAB2, PRDM4, CDKN2C, APBB1, IP6K2, SPP1	0.0275007	up
GO:0032956	regulation of actin cytoskeleton organization	13	TRIOBP, LIMA1, NF2, SMAD3, ARF6, ARPC5, LATS1, DSTN, NCK2, CDC42EP2, SCIN, RASA1, SPTAN1	0.0278049	up
GO:0008284	positive regulation of cell proliferation	42	FGFR1, FGFR4, PDGFB, ERBB2, TIPIN, PRRX1, TNFSF12, CALR, GLI2, ADA, ARNT, RPA1, S1PR3, SHC1, CALCRL, LAMB1, CDK13, CDC7, COL18A1, KLF5, ADAM10, SPHK2, TBX3, CD276, ROGDI, CDK6, IGF2, CDK2, KDR, HES1, VEGFB, SMO, NCK2, PLA2G4A, CCND1, NOTCH1, HDAC2, CCND2, VEGFA, PBX1, MAB21L1, LRP5	0.0282326	up
GO:0015014	heparan sulfate proteoglycan biosynthetic process, polysaccharide chain biosynthetic process	3	CSGALNACT1, EXT1, EXT2	0.0288951	up
GO:0007612	learning	10	APP, AAAS, CHST10, BCHE, HTT, FYN, NF1, APBB1, EPHB2, RIC8A	0.0289449	up
GO:0045785	positive regulation of cell adhesion	10	ITGA6, SMAD7, ERBB2, SMOC1, SMAD3, CDK6, ECM2, THBS1, EMILIN1, SPP1	0.0289449	up
GO:0043254	regulation of protein complex assembly	13	TRIOBP, MAP1B, ARF6, ARPC5, LATS1, AHR, NCK2, CDC42EP2, GSK3B, SCIN, CAND1, RASA1, SPTAN1	0.030037	up
GO:0045665	negative regulation of neuron differentiation	7	NOTCH3, HES1, NOTCH1, PBX1, REST, CALR, TTC3	0.0301138	up
GO:0014032	neural crest cell development	7	NRP2, EDNRA, SMO, EDNRB, LAMA5, SEMA3C, ZEB2	0.0301138	up
GO:0014033	neural crest cell differentiation	7	NRP2, EDNRA, SMO, EDNRB, LAMA5, SEMA3C, ZEB2	0.0301138	up
GO:0008219	cell death	67	MEF2C, SGPP1, PREX1, RBM5, GJA1, TNFSF12, PTEN, CASP3, APP, CASP9, TIAM2, ATXN10, SHARPIN, CXCR4, SPG20, SPG21, NGFRAP1, DAP, CASP2, TOP2A, LUC7L3, DHCR24, MAGI3, ARHGEF2, DFFA, TP53, ARHGEF17, STK4, AHR, MGEA5, CDK11B, MAPK7, EIF2AK3, NEK6, MAP3K11, TRAF1, BID, ING4, STK17B, MMD, PPT1, ARF6, SCRIB, APLP1, PEA15, PEG10, THBS1, TRAF4, HIP1, CKAP2, ACTC1, TAOK2, HTT, RYBP, YWHAB, SMAD3, FAM188A, IG…	0.0305736	up
GO:0001649	osteoblast differentiation	8	SMO, NF1, SMAD5, SMAD3, IGF2, SMAD1, GLI2, SPP1	0.0307912	up
GO:0070507	regulation of microtubule cytoskeleton organization	8	XPO1, ARHGEF2, MACF1, CEP250, MAP1A, MAP1B, KATNB1, CLASP1	0.0307912	up
GO:0007611	learning or memory	15	EGR1, FZD9, HTT, NF1, PTEN, EPHB2, RIC8A, APP, AAAS, CHST10, FYN, ITGA5, BCHE, ITGA8, APBB1	0.0309483	up
GO:0000280	nuclear division	25	HAUS4, FZR1, LZTS2, TIPIN, KATNB1, LATS1, NDE1, CLASP1, CDCA3, ARHGEF2, KIF11, PDS5B, MAP2K1, CKAP5, PAPD7, CDC20, NDC80, SMC3, WEE1, CDK2, NCAPD2, MAD2L1, CDK11B, HAUS8, NEK6	0.0310561	up
GO:0007067	mitosis	25	HAUS4, FZR1, LZTS2, TIPIN, KATNB1, LATS1, NDE1, CLASP1, CDCA3, ARHGEF2, KIF11, PDS5B, MAP2K1, CKAP5, PAPD7, CDC20, NDC80, SMC3, WEE1, CDK2, NCAPD2, MAD2L1, CDK11B, HAUS8, NEK6	0.0310561	up
GO:0031111	negative regulation of microtubule polymerization or depolymerization	5	ARHGEF2, MAP1A, MAP1B, KATNB1, CLASP1	0.0311707	up
GO:0030512	negative regulation of transforming growth factor beta receptor signaling pathway	5	PEG10, HTRA1, TGFB3, SKIL, ENG	0.0311707	up
GO:0006297	nucleotide-excision repair, DNA gap filling	5	RFC5, RPA1, RFC1, RFC2, POLD2	0.0311707	up
GO:0021513	spinal cord dorsal/ventral patterning	4	SMO, TULP3, RAB23, GLI2	0.0315256	up
GO:0051248	negative regulation of protein metabolic process	22	FZR1, NF2, SMAD7, YWHAB, IGF2, IGF2BP2, CDC20, ITGB3, CALR, EIF2AK1, MAD2L1, PSMD10, ITGAV, RAB23, MGEA5, DNMT1, PSMD5, FAM129A, THBS1, ENG, EIF2AK3, EIF2AK4	0.0318117	up
GO:0008104	protein localization	80	XPO1, SEC31A, AP1G1, VPS52, USE1, PEX6, TGFB3, AP2B1, AP1S2, CEP250, TRAK2, HOMER3, RANBP6, NECAP2, RAB23, TLK1, DHCR24, STX6, SEC23A, KDELR3, ARHGEF2, TP53, VPS41, STXBP4, FLNB, BBS2, RAB11FIP2, SEC61B, MGEA5, KPNA2, COPE, FRAS1, BID, ARFGAP3, YWHAZ, AKAP12, KATNB1, NUP93, PPT1, CTSA, SNX4, AKAP10, ARF6, CALR, SEC62, MACF1, AP3M1, TMED3, PEX14, SNAP23, APPBP2, PCSK5, TNPO1, EXOC2, RAB2B, RAB8B, …	0.0322472	up
GO:0048705	skeletal system morphogenesis	15	BMP1, THRA, NDST1, RYK, TGFB3, PRRX1, COL2A1, ZEB1, MMP2, ACVR2B, HOXC8, TULP3, NAB2, HOXA6, GFPT1	0.0330925	up
GO:0007219	Notch signaling pathway	9	NOTCH3, NCSTN, NOTCH2, APP, NOTCH1, ADAM10, MIB2, JAG1, POFUT1	0.0335077	up
GO:0043406	positive regulation of MAP kinase activity	14	PDGFB, MAP2K1, PTPLAD1, ERBB2, MET, TGFB3, ZEB2, PRDX2, LPAR1, CXCR4, MAPK8IP3, SHC1, THBS1, MAP3K11	0.0340867	up
GO:0019058	viral infectious cycle	8	XRCC5, CXCR4, HTATSF1, PSIP1, UBP1, PCSK5, BANF1, NFIA	0.0345484	up
GO:0006029	proteoglycan metabolic process	8	CSGALNACT1, NDST1, NDST2, SULF1, CHST14, COL2A1, EXT1, EXT2	0.0345484	up
GO:0016265	death	67	MEF2C, SGPP1, PREX1, RBM5, GJA1, TNFSF12, PTEN, CASP3, APP, CASP9, TIAM2, ATXN10, SHARPIN, CXCR4, SPG20, SPG21, NGFRAP1, DAP, CASP2, TOP2A, LUC7L3, DHCR24, MAGI3, ARHGEF2, DFFA, TP53, ARHGEF17, STK4, AHR, MGEA5, CDK11B, MAPK7, EIF2AK3, NEK6, MAP3K11, TRAF1, BID, ING4, STK17B, MMD, PPT1, ARF6, SCRIB, APLP1, PEA15, PEG10, THBS1, TRAF4, HIP1, CKAP2, ACTC1, TAOK2, HTT, RYBP, YWHAB, SMAD3, FAM188A, IG…	0.0348332	up
GO:0032970	regulation of actin filament-based process	13	TRIOBP, LIMA1, NF2, SMAD3, ARF6, ARPC5, LATS1, DSTN, NCK2, CDC42EP2, SCIN, RASA1, SPTAN1	0.0348834	up
GO:0000087	M phase of mitotic cell cycle	25	HAUS4, FZR1, LZTS2, TIPIN, KATNB1, LATS1, NDE1, CLASP1, CDCA3, ARHGEF2, KIF11, PDS5B, MAP2K1, CKAP5, PAPD7, CDC20, NDC80, SMC3, WEE1, CDK2, NCAPD2, MAD2L1, CDK11B, HAUS8, NEK6	0.0372685	up
GO:0007043	cell-cell junction assembly	5	GJA1, GJA4, CTNNA1, GJA5, GJC1	0.0378287	up
GO:0048701	embryonic cranial skeleton morphogenesis	5	TULP3, NDST1, GFPT1, PRRX1, TGFB3	0.0378287	up
GO:0030501	positive regulation of bone mineralization	5	ACVR2B, PLA2G4A, CD276, TGFB3, SMAD3	0.0378287	up
GO:0002683	negative regulation of immune system process	12	CASP3, HMGB3, IL27RA, ERBB2, CD276, PRDX2, IGF2, SOCS5, THBS1, ADA, PAG1, THY1	0.0382181	up
GO:0001656	metanephros development	8	SPRY1, GPC3, CD44, LAMA5, ITGA8, NF1, PBX1, GZF1	0.0385976	up
GO:0031023	microtubule organizing center organization	7	HAUS4, NDE1, KIF11, CEP250, CKAP5, HAUS8, PCM1	0.0390365	up
GO:0010551	regulation of specific transcription from RNA polymerase II promoter	13	MEF2C, HMGB2, THRA, SMAD7, CREB1, TP53, SMAD3, HES1, NOTCH1, HDAC2, ETS1, BCOR, ENG	0.0402609	up
GO:0030833	regulation of actin filament polymerization	9	TRIOBP, NCK2, CDC42EP2, SCIN, ARF6, ARPC5, LATS1, RASA1, SPTAN1	0.0408154	up
GO:0031571	G1 DNA damage checkpoint	4	CCND1, PCBP4, TP53, DGKZ	0.0410476	up
GO:0033865	nucleoside bisphosphate metabolic process	4	PANK2, PANK1, ACLY, PAPSS1	0.0410476	up
GO:0006378	mRNA polyadenylation	4	APP, CSTF3, CSTF1, APLP1	0.0410476	up
GO:0032101	regulation of response to external stimulus	19	ADAM10, PDGFB, PDPN, CD276, SMAD3, IGF2, TRIM24, ADA, ANXA2, KDR, EDNRA, AGTR1, PLA2G4A, VEGFA, FCER1G, CALCRL, THBS1, PLAU, SPP1	0.0415353	up
GO:0032103	positive regulation of response to external stimulus	10	EDNRA, AGTR1, PLA2G4A, ADAM10, PDGFB, VEGFA, SMAD3, FCER1G, THBS1, KDR	0.041721	up
GO:0060429	epithelium development	25	FRAS1, ZEB2, JAG1, GLI2, SCRIB, CASP3, GPC3, CD44, SHARPIN, ALDH1A3, NR2F2, COL18A1, MAP2K1, HTT, VASP, GZF1, FZD6, KDR, NOTCH2, LAMA5, FREM2, VEGFA, PBX1, IFT52, ENG	0.0425033	up
GO:0000271	polysaccharide biosynthetic process	8	CSGALNACT1, XYLT2, NDST1, XYLT1, B3GNT1, CERCAM, EXT1, EXT2	0.0429453	up
GO:0051495	positive regulation of cytoskeleton organization	8	NCK2, CDC42EP2, NF2, MAP1B, KATNB1, SMAD3, ARF6, DSTN	0.0429453	up
GO:0010033	response to organic substance	66	ARSB, ADCY3, THRA, LDLR, PDGFB, TGFB3, PRDX2, PTEN, LATS1, ASAH1, EDNRA, CASP3, CD44, CREB3L2, RARA, GNG2, PRKACA, SHC1, LOX, DDAH2, EGR1, ADAM10, GATM, STXBP4, CLIC1, CDO1, CCND1, ACVR2B, CCND2, GNB1, SLC25A36, MGEA5, HSPB3, EIF2AK3, EIF2AK4, HMGB2, PANX1, ERBB2, ADH5, ACP2, GNG12, TTC3, PHIP, BCHE, THBS1, SPP1, ACTC1, MAP2K1, CREB1, MAP1B, PTPRA, SMAD3, IGF2, MALT1, SMAD2, SMAD1, PLA2G4A, HDAC2…	0.0435947	up
GO:0048565	gut development	7	EDNRB, ACVR2B, NOTCH1, TGFB3, GLI2, PCSK5, ADA	0.0440646	up
GO:0030203	glycosaminoglycan metabolic process	9	CSGALNACT1, GNS, XYLT2, NDST1, XYLT1, EXT1, EXT2, FUCA1, CHST1	0.0448373	up
GO:0051494	negative regulation of cytoskeleton organization	9	TRIOBP, ARHGEF2, LIMA1, MAP1A, SCIN, MAP1B, KATNB1, CLASP1, SPTAN1	0.0448373	up
GO:0007224	smoothened signaling pathway	5	SMO, NDST1, CDON, IFT52, GLI2	0.0452369	up
GO:0048483	autonomic nervous system development	5	HES1, SMO, EDNRB, ERBB2, NF1	0.0452369	up
GO:0070169	positive regulation of biomineral formation	5	ACVR2B, PLA2G4A, CD276, TGFB3, SMAD3	0.0452369	up
GO:0008154	actin polymerization or depolymerization	5	PREX1, EVL, WASL, GAS7, DSTN	0.0452369	up
GO:0006022	aminoglycan metabolic process	10	CSGALNACT1, GNS, XYLT2, NDST1, XYLT1, B3GNT1, EXT1, EXT2, FUCA1, CHST1	0.0454268	up
GO:0051642	centrosome localization	3	SEMA6A, NIN, PLXNA2	0.0458501	up
GO:0051895	negative regulation of focal adhesion formation	3	ACVRL1, THBS1, PTEN	0.0458501	up
GO:0031053	primary microRNA processing	3	SMAD3, SMAD2, SMAD1	0.0458501	up
GO:0048285	organelle fission	25	HAUS4, FZR1, LZTS2, TIPIN, KATNB1, LATS1, NDE1, CLASP1, CDCA3, ARHGEF2, KIF11, PDS5B, MAP2K1, CKAP5, PAPD7, CDC20, NDC80, SMC3, WEE1, CDK2, NCAPD2, MAD2L1, CDK11B, HAUS8, NEK6	0.0462815	up
GO:0044092	negative regulation of molecular function	34	ADCY3, FZR1, THRA, GNAI3, PRDX2, LATS1, SPRY4, S1PR3, EDNRB, SPRY2, CASP3, SPRY1, PKD2, PEX14, SPRED1, PSMD5, DHCR24, NF2, SMAD7, NF1, TP53, IGF2, CDC20, PKIA, THY1, SMO, HDAC2, MAD2L1, ID1, PSMD10, RGS4, PBX1, CAND1, ENG	0.0466473	up
GO:0043010	camera-type eye development	14	PTPRM, NF1, SIX5, ZEB1, THY1, EPHB2, TULP3, SP3, PVRL3, ALDH1A3, VEGFA, TGIF2, MAB21L1, MYH10	0.0474582	up
GO:0007017	microtubule-based process	27	HAUS4, APP, PTK2, NDE1, MACF1, CEP250, TUBB6, CLASP1, TUBA1A, TUBA1C, KIF2A, KIF11, MAP2K1, CKAP5, HTT, MAP1B, NDC80, PCM1, KIF3C, SMC3, SS18, BBS2, STMN1, HAUS8, KPNA2, DYNC1I2, MAP3K11	0.0480286	up
GO:0033273	response to vitamin	10	PLA2G4A, CCND1, CD44, BCHE, MAP1B, RARA, TIE1, IGFBP2, SPP1, MEST	0.0493458	up
GO:0045740	positive regulation of DNA replication	6	PDGFB, TGFB3, IGF2, SHC1, GLI2, CALR	0.0494406	up
